# Supplementary material for: Fitness effects of altering gene expression noise in Saccharomyces cerevisiae
Source: eLife. 2018 Aug 20;7:e37272. doi: 10.7554/eLife.37272 (PMC6133559; doi:10.7554/eLife.37272)
Supplement: Figure 2—figure supplement 1—source data 1. — The median and noise of activity of the 20 PTDH3 alleles were measured by flow cytometry and analyzed using the R script provided in Supplementary file 3. Data used to make Figure 2—figure supplement 1A–B. [file elife-37272-fig2-figsupp1-data1.xlsx]

## Sheet: Legend
Figure 2 - figure supplement 1 - Source Data 1
Activity of 20 PTDH3 alleles driving expression of YFP at the HO locus compared to the activity of the same alleles driving expression of TDH3-YFP at the native TDH3 locus.
The median and noise of activity of the 20 PTDH3 alleles were measured by flow cytometry and analyzed using the R script provided in Supplementary File 3.
These data were used to make Figure 2 - figure supplement 1A-B.
Headers	Description
VARIANT.ID	Unique name for each PTDH3 allele. See Figure 2-3 - Source Data 1 for further details. Alleles not included in the final set are named "NA".
MUTATION	Arbitrary name referring to the mutation(s) carried by the PTDH3 allele.
YFP.CONSTRUCT	Indicates whether the PTDH3 allele is inserted at the native locus ("FUSION") or at the HO locus ("HO").
N.REP	Number of replicate populations of the same strain analyzed by flow cytometry.
HO.MEDIAN.ADJUST.MEAN	Mean of the median fluorescence level across all replicate populations. Fluorescence levels were transformed to scale linearly with YFP mRNA levels and the median fluorescence level of the non-fluorescent strain YPW978 was subtracted from all samples.
HO.SD.ADJUST.MEAN	Standard deviation of fluorescence levels among cells averaged across all replicate populations. Fluorescence levels were transformed to scale linearly with YFP mRNA levels and the standard deviation of fluorescence of the non-fluorescent strain YPW978 was subtracted from all samples.
HO.MEDIAN.RELATIVE.MEAN	Median fluorescence level of the sample divided by the median fluorescence level of the wild-type PTDH3 allele inserted at HO and averaged across all replicate populations.
HO.SD.SCALED.MEAN	Standard deviation of fluorescence levels among cells divided by the median fluorescence level of the the wild-type PTDH3 allele inserted at HO and averaged across all replicate populations.
HO.CV.MEAN	Standard deviation divided by the median fluorescence levels among cells averaged across all replicate populations. Fluorescence levels were transformed to scale linearly with YFP mRNA levels. The standard deviation and median of fluorescence of the non-fluorescent strain YPW978 was subtracted from all samples.
HO.FANO.MEAN	Variance divided by the median fluorescence levels among cells averaged across all replicate populations. Fluorescence levels were transformed to scale linearly with YFP mRNA levels. The variance and median of fluorescence of the non-fluorescent strain YPW978 was subtracted from all samples.
HO.LOG.CV.MEAN	Logarithm of the standard deviation divided by the median fluorescence levels among cells averaged across all replicate populations. Fluorescence levels were transformed to scale linearly with YFP mRNA levels. The standard deviation and median of fluorescence of the non-fluorescent strain YPW978 was subtracted from all samples.
HO.SD.RELATIVE.MEAN	Standard deviation of fluorescence levels among cells divided by the standard deviation of fluorescence levels for the wild-type PTDH3 allele inserted at HO and averaged across all replicate populations.
HO.CV.RELATIVE.MEAN	Standard deviation divided by the median fluorescence levels among cells divided by the same metric for the wild-type PTDH3 allele inserted at HO and averaged across all replicate populations.
HO.FANO.RELATIVE.MEAN	Variance divided by the median fluorescence levels among cells divided by the same metric for the wild-type PTDH3 allele inserted at HO and averaged across all replicate populations.
HO.LOG.CV.RELATIVE.MEAN	Logarithm of the standard deviation divided by the median fluorescence levels among cells divided by the same metric for the wild-type PTDH3 allele inserted at HO and averaged across all replicate populations.
NATIVE.MEDIAN.ADJUST.MEAN	Same as HO.MEDIAN.ADJUST.MEAN.
NATIVE.SD.ADJUST.MEAN	Same as HO.SD.ADJUST.MEAN.
NATIVE.MEDIAN.RELATIVE.MEAN	Median fluorescence level of the sample divided by the median fluorescence level of the wild-type PTDH3 allele inserted at the native TDH3 locus and averaged across all replicate populations.
NATIVE.SD.SCALED.MEAN	Standard deviation of fluorescence levels among cells divided by the median fluorescence level of the the wild-type PTDH3 allele inserted at the native TDH3 locus and averaged across all replicate populations.
NATIVE.CV.MEAN	Same as HO.CV.MEAN.
NATIVE.FANO.MEAN	Same as HO.FANO.MEAN.
NATIVE.LOG.CV.MEAN	Same as HO.LOG.CV.MEAN.
NATIVE.SD.RELATIVE.MEAN	Standard deviation of fluorescence levels among cells divided by the standard deviation of fluorescence levels for the wild-type PTDH3 allele inserted at the native TDH3 locus and averaged across all replicate populations.
NATIVE.CV.RELATIVE.MEAN	Standard deviation divided by the median fluorescence levels among cells divided by the same metric for the wild-type PTDH3 allele inserted at the native TDH3 locus and averaged across all replicate populations.
NATIVE.FANO.RELATIVE.MEAN	Variance divided by the median fluorescence levels among cells divided by the same metric for the wild-type PTDH3 allele inserted at the native TDH3 locus and averaged across all replicate populations.
NATIVE.LOG.CV.RELATIVE.MEAN	Logarithm of the standard deviation divided by the median fluorescence levels among cells divided by the same metric for the wild-type PTDH3 allele inserted at the native TDH3 locus and averaged across all replicate populations.
HO.MEDIAN.ADJUST.SD	Similar to HO.MEDIAN.ADJUST.MEAN, but this is the standard deviation across replicate populations instead of the mean.
HO.SD.ADJUST.SD	Similar to HO.SD.ADJUST.MEAN, but this is the standard deviation across replicate populations instead of the mean.
HO.MEDIAN.RELATIVE.SD	Similar to HO.MEDIAN.RELATIVE.MEAN, but this is the standard deviation across replicate populations instead of the mean.
HO.SD.SCALED.SD	Similar to HO.SD.SCALED.MEAN, but this is the standard deviation across replicate populations instead of the mean.
HO.CV.SD	Similar to HO.CV.MEAN, but this is the standard deviation across replicate populations instead of the mean.
HO.FANO.SD	Similar to HO.FANO.MEAN, but this is the standard deviation across replicate populations instead of the mean.
HO.LOG.CV.SD	Similar to HO.LOG.CV.MEAN, but this is the standard deviation across replicate populations instead of the mean.
HO.SD.RELATIVE.SD	Similar to HO.SD.RELATIVE.MEAN, but this is the standard deviation across replicate populations instead of the mean.
HO.CV.RELATIVE.SD	Similar to HO.CV.RELATIVE.MEAN, but this is the standard deviation across replicate populations instead of the mean.
HO.FANO.RELATIVE.SD	Similar to HO.FANO.RELATIVE.MEAN, but this is the standard deviation across replicate populations instead of the mean.
HO.LOG.CV.RELATIVE.SD	Similar to HO.LOG.CV.RELATIVE.MEAN, but this is the standard deviation across replicate populations instead of the mean.
NATIVE.MEDIAN.ADJUST.SD	Similar to NATIVE.MEDIAN.ADJUST.MEAN, but this is the standard deviation across replicate populations instead of the mean.
NATIVE.SD.ADJUST.SD	Similar to NATIVE.SD.ADJUST.MEAN, but this is the standard deviation across replicate populations instead of the mean.
NATIVE.MEDIAN.RELATIVE.SD	Similar to NATIVE.MEDIAN.RELATIVE.MEAN, but this is the standard deviation across replicate populations instead of the mean.
NATIVE.SD.SCALED.SD	Similar to NATIVE.SD.SCALED.MEAN, but this is the standard deviation across replicate populations instead of the mean.
NATIVE.CV.SD	Similar to NATIVE.CV.MEAN, but this is the standard deviation across replicate populations instead of the mean.
NATIVE.FANO.SD	Similar to NATIVE.FANO.MEAN, but this is the standard deviation across replicate populations instead of the mean.
NATIVE.LOG.CV.SD	Similar to NATIVE.LOG.CV.MEAN, but this is the standard deviation across replicate populations instead of the mean.
NATIVE.SD.RELATIVE.SD	Similar to NATIVE.SD.RELATIVE.MEAN, but this is the standard deviation across replicate populations instead of the mean.
NATIVE.CV.RELATIVE.SD	Similar to NATIVE.CV.RELATIVE.MEAN, but this is the standard deviation across replicate populations instead of the mean.
NATIVE.FANO.RELATIVE.SD	Similar to NATIVE.FANO.RELATIVE.MEAN, but this is the standard deviation across replicate populations instead of the mean.
NATIVE.LOG.CV.RELATIVE.SD	Similar to NATIVE.LOG.CV.RELATIVE.MEAN, but this is the standard deviation across replicate populations instead of the mean.

## Sheet: Data
VARIANT.ID	MUTATION	YFP.CONSTRUCT	N.REP	HO.MEDIAN.ADJUST.MEAN	HO.SD.ADJUST.MEAN	HO.MEDIAN.RELATIVE.MEAN	HO.SD.SCALED.MEAN	HO.CV.MEAN	HO.FANO.MEAN	HO.LOG.CV.MEAN	HO.SD.RELATIVE.MEAN	HO.CV.RELATIVE.MEAN	HO.FANO.RELATIVE.MEAN	HO.LOG.CV.RELATIVE.MEAN	NATIVE.MEDIAN.ADJUST.MEAN	NATIVE.SD.ADJUST.MEAN	NATIVE.MEDIAN.RELATIVE.MEAN	NATIVE.SD.SCALED.MEAN	NATIVE.CV.MEAN	NATIVE.FANO.MEAN	NATIVE.LOG.CV.MEAN	NATIVE.SD.RELATIVE.MEAN	NATIVE.CV.RELATIVE.MEAN	NATIVE.FANO.RELATIVE.MEAN	NATIVE.LOG.CV.RELATIVE.MEAN	NATIVE.CV2.RELATIVE.MEAN	NATIVE.LOG.CV2.RELATIVE.MEAN	HO.MEDIAN.ADJUST.SD	HO.SD.ADJUST.SD	HO.MEDIAN.RELATIVE.SD	HO.SD.SCALED.SD	HO.CV.SD	HO.FANO.SD	HO.LOG.CV.SD	HO.SD.RELATIVE.SD	HO.CV.RELATIVE.SD	HO.FANO.RELATIVE.SD	HO.LOG.CV.RELATIVE.SD	NATIVE.MEDIAN.ADJUST.SD	NATIVE.SD.ADJUST.SD	NATIVE.MEDIAN.RELATIVE.SD	NATIVE.SD.SCALED.SD	NATIVE.CV.SD	NATIVE.FANO.SD	NATIVE.LOG.CV.SD	NATIVE.SD.RELATIVE.SD	NATIVE.CV.RELATIVE.SD	NATIVE.FANO.RELATIVE.SD	NATIVE.LOG.CV.RELATIVE.SD
NA	m123	FUSION	4	0.589571	0.0599605	1.47065	0.149568	0.10171	0.0152128	-3.29754	1.41005	0.958866	1.35207	-0.0606661	0.589571	0.0599605	0.988267	0.100509	0.10171	0.0102229	-3.29754	0.963387	0.974898	0.93922	-0.0367434	0.950515	-0.0734868	0.00658881	0.000408624	0.0164354	0.00101929	0.00113262	0.000224419	0.0160064	0.00960932	0.0106778	0.0199458	0.0160064	0.00658881	0.000408624	0.0110445	0.000684954	0.00113262	0.000150808	0.0160064	0.00656536	0.0108563	0.0138554	0.0160064
NA	m142	FUSION	4	0.582316	0.0610211	1.45255	0.152213	0.1048	0.0159606	-3.25474	1.43499	0.988	1.41854	-0.017871	0.582316	0.0610211	0.976104	0.102286	0.1048	0.0107254	-3.25474	0.980426	1.00452	0.985391	0.00605171	1.0097	0.0121034	0.00883087	0.00174801	0.0220281	0.0043603	0.00304375	0.000892451	0.0417527	0.0411067	0.0286949	0.0793188	0.0417527	0.00883087	0.00174801	0.0148027	0.00293009	0.00304375	0.00059972	0.0417527	0.0280852	0.0291747	0.0550989	0.0417527
NA	m153	FUSION	4	0.647028	0.067708	1.61397	0.168894	0.104636	0.0176926	-3.25732	1.59224	0.986451	1.57247	-0.020445	0.647028	0.067708	1.08458	0.113495	0.104636	0.0118893	-3.25732	1.08787	1.00294	1.09232	0.00347767	1.00697	0.00695534	0.00536213	0.00279518	0.0133755	0.00697241	0.00394722	0.00139395	0.054129	0.0657323	0.0372123	0.123891	0.054129	0.00536213	0.00279518	0.00898825	0.00468541	0.00394722	0.000936724	0.054129	0.0449102	0.0378345	0.086061	0.054129
NA	m154	FUSION	8	0.642774	0.068517	1.60336	0.170912	0.106582	0.0182256	-3.23024	1.61127	1.0048	1.61984	0.00663611	0.642774	0.068517	1.07745	0.114851	0.106582	0.0122475	-3.23024	1.10086	1.02161	1.12523	0.0305588	1.04408	0.0611175	0.00771202	0.00203243	0.0192372	0.00506977	0.00224709	0.000916878	0.0303239	0.0477952	0.0211844	0.0814898	0.0303239	0.00771202	0.00203243	0.0129272	0.00340685	0.00224709	0.000616135	0.0303239	0.0326551	0.0215386	0.0566071	0.0303239
NA	m156	FUSION	8	0.652423	0.0685376	1.62743	0.170963	0.105081	0.0179948	-3.25184	1.61175	0.990648	1.59933	-0.0149707	0.652423	0.0685376	1.09362	0.114886	0.105081	0.0120924	-3.25184	1.10119	1.00721	1.11098	0.00895196	1.01646	0.0179039	0.01107	0.00295539	0.0276136	0.00737206	0.00497063	0.00159137	0.0683471	0.0695	0.0468605	0.141437	0.0683471	0.01107	0.00295539	0.0185561	0.00495397	0.00497063	0.00106939	0.0683471	0.0474843	0.047644	0.0982493	0.0683471
NA	m160	FUSION	4	0.57957	0.0626416	1.4457	0.156256	0.108102	0.0169015	-3.21009	1.4731	1.01913	1.50216	0.0267841	0.57957	0.0626416	0.971502	0.105003	0.108102	0.0113577	-3.21009	1.00646	1.03617	1.04348	0.0507068	1.07447	0.101414	0.00796219	0.00169839	0.0198612	0.00423654	0.00345209	0.000968108	0.04617	0.0399399	0.0325446	0.086043	0.04617	0.00796219	0.00169839	0.0133466	0.00284692	0.00345209	0.000650561	0.04617	0.0272881	0.0330887	0.0597699	0.04617
NA	m184	FUSION	8	0.614919	0.0653059	1.53388	0.162902	0.106199	0.0173161	-3.23581	1.53575	1.00119	1.53902	0.00106344	0.614919	0.0653059	1.03076	0.109469	0.106199	0.0116363	-3.23581	1.04927	1.01793	1.06908	0.0249861	1.03712	0.0499722	0.00584407	0.00225081	0.0145777	0.00561452	0.00341351	0.00113667	0.046485	0.0529308	0.0321808	0.101024	0.046485	0.00584407	0.00225081	0.0097961	0.00377291	0.00341351	0.000763833	0.046485	0.0361638	0.0327188	0.0701768	0.046485
NA	m221	FUSION	3	0.605862	0.0651404	1.51129	0.162489	0.107517	0.0174731	-3.21748	1.53186	1.01361	1.55296	0.0193902	0.605862	0.0651404	1.01557	0.109191	0.107517	0.0117418	-3.21748	1.04661	1.03056	1.07877	0.0433129	1.06222	0.0866257	0.00444065	0.00112845	0.0110769	0.00281485	0.00165702	0.000559902	0.0221457	0.026537	0.0156215	0.0497627	0.0221457	0.00444065	0.00112845	0.00744363	0.00189156	0.00165702	0.00037625	0.0221457	0.0181308	0.0158827	0.0345677	0.0221457
Var5	m63	FUSION	8	0.485264	0.0523266	1.21046	0.130526	0.107845	0.0140909	-3.21379	1.23053	1.01671	1.25236	0.0230787	0.485264	0.0523266	0.813422	0.0877123	0.107845	0.00946898	-3.21379	0.840732	1.03371	0.869957	0.0470014	1.06977	0.0940028	0.00570011	0.00177945	0.0142186	0.00443872	0.00388989	0.000971848	0.0524314	0.041846	0.0366719	0.0863754	0.0524314	0.00570011	0.00177945	0.00955478	0.00298279	0.00388989	0.000653074	0.0524314	0.0285904	0.037285	0.0600008	0.0524314
Var4	m66	FUSION	8	0.391738	0.0491908	0.977167	0.122704	0.125575	0.0154135	-2.99364	1.15679	1.18386	1.36991	0.243236	0.391738	0.0491908	0.656649	0.0824559	0.125575	0.0103577	-2.99364	0.79035	1.20365	0.95161	0.267159	1.44929	0.534317	0.00867006	0.00140524	0.021627	0.00350529	0.00253516	0.000676151	0.029275	0.0330461	0.0239002	0.0600946	0.029275	0.00867006	0.00140524	0.0145332	0.00235553	0.00253516	0.000454368	0.029275	0.022578	0.0242998	0.0417448	0.029275
Var2	m75	FUSION	5	0.295009	0.0405223	0.735883	0.101081	0.137365	0.0138864	-2.86401	0.952935	1.29501	1.23419	0.372859	0.295009	0.0405223	0.494508	0.0679254	0.137365	0.00933157	-2.86401	0.651072	1.31666	0.857333	0.396781	1.73386	0.793563	0.00197027	0.000447357	0.00491472	0.00111591	0.00186274	0.000330724	0.0195246	0.0105202	0.017561	0.029394	0.0195246	0.00197027	0.000447357	0.00330265	0.000749881	0.00186274	0.000222244	0.0195246	0.00718769	0.0178546	0.0204186	0.0195246
Var3	m76	FUSION	8	0.174796	0.0320415	0.436019	0.0799258	0.183457	0.0146715	-2.44748	0.753499	1.72954	1.30397	0.789394	0.174796	0.0320415	0.293001	0.0537095	0.183457	0.00985915	-2.44748	0.514812	1.75846	0.905804	0.813316	3.09657	1.62663	0.00522485	0.000797509	0.0130331	0.00198934	0.00739043	0.000892941	0.056923	0.0187545	0.0696731	0.0793623	0.056923	0.00522485	0.000797509	0.00875813	0.00133682	0.00739043	0.000600049	0.056923	0.0128136	0.0708381	0.0551292	0.056923
Var6	m89	FUSION	8	0.523619	0.0548341	1.30614	0.13678	0.104724	0.0143349	-3.25589	1.2895	0.987287	1.27405	-0.0190194	0.523619	0.0548341	0.877714	0.0919154	0.104724	0.00963296	-3.25589	0.88102	1.00379	0.885023	0.00490323	1.00839	0.00980645	0.00574124	0.00167715	0.0143212	0.00418355	0.00312337	0.000849017	0.0430216	0.0394403	0.0294456	0.0754585	0.0430216	0.00574124	0.00167715	0.00962373	0.00281131	0.00312337	0.000570533	0.0430216	0.0269467	0.0299379	0.0524174	0.0430216
Var7	m90	FUSION	8	0.502223	0.0527039	1.25277	0.131467	0.104954	0.0138143	-3.2531	1.2394	0.989448	1.22778	-0.0162317	0.502223	0.0527039	0.84185	0.0883448	0.104954	0.00928312	-3.2531	0.846795	1.00599	0.852881	0.00769095	1.01334	0.0153819	0.00563033	0.00193202	0.0140445	0.00481932	0.00405428	0.00104105	0.0551221	0.045434	0.0382216	0.0925261	0.0551221	0.00563033	0.00193202	0.00943782	0.00323854	0.00405428	0.000699579	0.0551221	0.0310418	0.0388607	0.0642734	0.0551221
Var8	m91	FUSION	3	0.545901	0.0593808	1.36172	0.148122	0.108794	0.0161147	-3.20044	1.39642	1.02566	1.43223	0.036433	0.545901	0.0593808	0.915065	0.0995369	0.108794	0.0108289	-3.20044	0.954073	1.04281	0.994903	0.0603557	1.08762	0.120711	0.00959465	0.000366327	0.0239333	0.00091378	0.00168015	0.000254054	0.0223803	0.00861465	0.0158396	0.0225797	0.0223803	0.00959465	0.000366327	0.016083	0.000614054	0.00168015	0.000170722	0.0223803	0.00588577	0.0161045	0.015685	0.0223803
Var1.1	WT	FUSION	3	0.596842	0.0633992	1.48879	0.158146	0.106239	0.0168021	-3.23476	1.49091	1.00156	1.49333	0.00211469	0.596842	0.0633992	1.00045	0.106273	0.106239	0.0112909	-3.23476	1.01864	1.01831	1.03734	0.0260373	1.03715	0.0520747	0.00721633	0.000362099	0.0180007	0.000903235	0.00179531	0.000372909	0.0243606	0.00851524	0.0169253	0.0331432	0.0243606	0.00721633	0.000362099	0.0120963	0.000606967	0.00179531	0.000250592	0.0243606	0.00581785	0.0172082	0.023023	0.0243606
Var17	TATA.129	FUSION	8	0.421159	0.0441689	1.05056	0.110177	0.104866	0.0115699	-3.25433	1.03869	0.988626	1.0283	-0.0174618	0.421159	0.0441689	0.705966	0.0740379	0.104866	0.00777489	-3.25433	0.709662	1.00516	0.714313	0.00646084	1.01166	0.0129217	0.00274307	0.00183336	0.00684243	0.0045732	0.00405945	0.00091796	0.056435	0.0431138	0.0382704	0.081586	0.056435	0.00274307	0.00183336	0.00459806	0.00307316	0.00405945	0.000616862	0.056435	0.0294566	0.0389102	0.0566739	0.056435
Var23	m75.TATA.42	FUSION	8	0.149736	0.0120291	0.373509	0.030006	0.0804219	0.00243106	-3.6423	0.282881	0.758176	0.216066	-0.405423	0.149736	0.0120291	0.250995	0.0201638	0.0804219	0.00163365	-3.6423	0.193272	0.770853	0.150091	-0.3815	0.599227	-0.763	0.00419218	0.00108169	0.0104572	0.00269821	0.00789668	0.000457971	0.140635	0.0254373	0.0744458	0.0407033	0.140635	0.00419218	0.00108169	0.00702713	0.00181317	0.00789668	0.000307753	0.140635	0.0173795	0.0756906	0.0282746	0.140635
Var16	TATA.26	FUSION	6	0.192825	0.00943198	0.48099	0.0235275	0.0489564	0.00116313	-4.35999	0.221805	0.461536	0.103376	-1.12312	0.192825	0.00943198	0.323222	0.0158103	0.0489564	0.000781612	-4.35999	0.151544	0.469253	0.0718101	-1.0992	0.222548	-2.1984	0.00286538	0.000987197	0.00714753	0.00246251	0.00554007	0.00025324	0.162227	0.0232152	0.0522289	0.0225073	0.162227	0.00286538	0.000987197	0.00480308	0.00165479	0.00554007	0.000170175	0.162227	0.0158613	0.0531022	0.0156347	0.162227
Var22	TATA.81	FUSION	8	0.293837	0.0281261	0.732959	0.070159	0.0957326	0.00672173	-3.3855	0.661423	0.902517	0.597411	-0.148625	0.293837	0.0281261	0.492543	0.0471463	0.0957326	0.00451695	-3.3855	0.451903	0.917608	0.414993	-0.124702	0.842766	-0.249405	0.00296819	0.00081804	0.00740397	0.00204055	0.00307922	0.000408202	0.0463354	0.0192373	0.0290293	0.0362799	0.0463354	0.00296819	0.00081804	0.00497541	0.00137124	0.00307922	0.000274308	0.0463354	0.0131435	0.0295147	0.0252019	0.0463354
NA	m123	HO	4	0.392343	0.0429442	0.978677	0.107122	0.109454	0.0117406	-3.19255	1.00989	1.03188	1.04347	0.0443216	0.392343	0.0429442	0.657664	0.071985	0.109454	0.00788957	-3.19255	0.689985	1.04913	0.72485	0.0682443	1.10213	0.136489	0.00161896	0.00182704	0.00403841	0.00455744	0.0045968	0.000992021	0.060436	0.0429652	0.0433363	0.0881684	0.060436	0.00161896	0.00182704	0.00271378	0.00306256	0.0045968	0.000666631	0.060436	0.029355	0.0440609	0.0612463	0.060436
NA	m142	HO	4	0.393149	0.0431293	0.980687	0.107584	0.109705	0.0118099	-3.18876	1.01424	1.03425	1.04963	0.0481102	0.393149	0.0431293	0.659014	0.0722954	0.109705	0.00793615	-3.18876	0.69296	1.05154	0.729129	0.0720329	1.10645	0.144066	0.00122177	0.00122638	0.00304764	0.00305913	0.00323308	0.00068592	0.0424025	0.0288399	0.0304799	0.0609629	0.0424025	0.00122177	0.00122638	0.00204799	0.00205571	0.00323308	0.000460933	0.0424025	0.0197042	0.0309895	0.042348	0.0424025
NA	m153	HO	4	0.446164	0.0474626	1.11293	0.118393	0.106411	0.0126449	-3.23512	1.11615	1.00319	1.12385	0.00175754	0.446164	0.0474626	0.747881	0.079559	0.106411	0.00849727	-3.23512	0.762583	1.01996	0.780682	0.0256802	1.04447	0.0513604	0.00442903	0.00323207	0.011048	0.0080622	0.00775896	0.00180021	0.104102	0.0760063	0.0731475	0.159998	0.104102	0.00442903	0.00323207	0.00742414	0.00541774	0.00775896	0.00120973	0.104102	0.0519297	0.0743705	0.111143	0.104102
NA	m154	HO	8	0.45176	0.0474793	1.12689	0.118434	0.105077	0.0124842	-3.25265	1.11654	0.990615	1.10957	-0.0157745	0.45176	0.0474793	0.75726	0.079587	0.105077	0.0083893	-3.25265	0.762851	1.00718	0.770762	0.00814815	1.01743	0.0162963	0.00479926	0.00298479	0.0119715	0.00744539	0.006126	0.00149179	0.0848847	0.0701913	0.0577528	0.132587	0.0848847	0.00479926	0.00298479	0.00804475	0.00500324	0.006126	0.00100247	0.0848847	0.0479567	0.0587184	0.0921015	0.0848847
NA	m156	HO	12	0.453622	0.0497181	1.13153	0.124019	0.10963	0.0136417	-3.19187	1.16919	1.03354	1.21244	0.0449984	0.453622	0.0497181	0.760382	0.0833398	0.10963	0.00916714	-3.19187	0.798821	1.05082	0.842226	0.0689211	1.1082	0.137842	0.00358156	0.00291295	0.008934	0.00726618	0.00687201	0.00165091	0.0903671	0.0685018	0.0647857	0.146728	0.0903671	0.00358156	0.00291295	0.00600358	0.00488282	0.00687201	0.0011094	0.0903671	0.0468024	0.065869	0.101925	0.0903671
NA	m160	HO	4	0.380417	0.0418736	0.948929	0.104451	0.110068	0.0115003	-3.18372	0.984712	1.03767	1.02212	0.0531481	0.380417	0.0418736	0.637673	0.0701904	0.110068	0.00772814	-3.18372	0.672783	1.05502	0.710019	0.0770708	1.11337	0.154142	0.00194264	0.000926916	0.0048458	0.00231214	0.00209563	0.00046786	0.027687	0.0217976	0.0197566	0.0415822	0.027687	0.00194264	0.000926916	0.00325634	0.00155374	0.00209563	0.000314399	0.027687	0.0148928	0.0200869	0.0288852	0.027687
NA	m184	HO	8	0.423093	0.0460713	1.05538	0.114922	0.108923	0.0125287	-3.19946	1.08343	1.02687	1.11352	0.0374105	0.423093	0.0460713	0.709208	0.0772269	0.108923	0.00841919	-3.19946	0.740229	1.04404	0.773508	0.0613332	1.09128	0.122666	0.0100564	0.00162907	0.025085	0.00406361	0.00396341	0.000850866	0.052671	0.0383096	0.037365	0.0756229	0.052671	0.0100564	0.00162907	0.016857	0.00273072	0.00396341	0.000571776	0.052671	0.0261742	0.0379897	0.0525316	0.052671
NA	m221	HO	4	0.415046	0.0447691	1.03531	0.111674	0.10787	0.0120487	-3.21281	1.05281	1.01694	1.07086	0.0240588	0.415046	0.0447691	0.695719	0.0750441	0.10787	0.00809664	-3.21281	0.719306	1.03394	0.743874	0.0479814	1.0693	0.0959629	0.00233747	0.000713997	0.00583069	0.00178102	0.00193967	0.000403302	0.0260409	0.0167906	0.0182863	0.0358444	0.0260409	0.00233747	0.000713997	0.00391818	0.00119683	0.00193967	0.000271016	0.0260409	0.0114718	0.018592	0.0248994	0.0260409
Var5	m63	HO	8	0.28343	0.03562	0.707	0.088852	0.125728	0.0111915	-2.99326	0.837651	1.1853	0.994669	0.24361	0.28343	0.03562	0.475099	0.0597079	0.125728	0.00752058	-2.99326	0.572307	1.20512	0.690949	0.267533	1.45552	0.535065	0.00422335	0.0015242	0.0105349	0.00380203	0.00632567	0.00101906	0.0739968	0.0358436	0.0596352	0.0905714	0.0739968	0.00422335	0.0015242	0.00707937	0.00255493	0.00632567	0.0006848	0.0739968	0.0244893	0.0606323	0.0629156	0.0739968
Var4	m66	HO	4	0.223701	0.0358764	0.55801	0.0894916	0.160536	0.0143766	-2.64025	0.843681	1.51345	1.27775	0.596625	0.223701	0.0358764	0.374979	0.0601377	0.160536	0.00966094	-2.64025	0.576427	1.53876	0.887593	0.620548	2.37187	1.2411	0.00672065	0.000809835	0.0167643	0.00202009	0.00770513	0.000985228	0.0681074	0.0190443	0.07264	0.0875646	0.0681074	0.00672065	0.000809835	0.0112655	0.00135748	0.00770513	0.000662066	0.0681074	0.0130116	0.0738546	0.0608269	0.0681074
Var2	m75	HO	8	0.149655	0.0229894	0.373307	0.0573457	0.15439	0.00885156	-2.69883	0.540626	1.45551	0.786704	0.53804	0.149655	0.0229894	0.250859	0.0385359	0.15439	0.00594818	-2.69883	0.369371	1.47984	0.546486	0.561963	2.20108	1.12393	0.0137906	0.00113789	0.0343998	0.0028384	0.0117781	0.000785082	0.105706	0.026759	0.111037	0.0697762	0.105706	0.0137906	0.00113789	0.0231164	0.00190738	0.0117781	0.00052757	0.105706	0.0182825	0.112894	0.0484701	0.105706
Var3	m76	HO	8	0.0610391	0.0142437	0.152258	0.0355301	0.233964	0.00832698	-2.0988	0.334959	2.20569	0.740081	1.13808	0.0610391	0.0142437	0.102316	0.023876	0.233964	0.00559567	-2.0988	0.228854	2.24257	0.514099	1.162	5.0509	2.324	0.00422188	0.000899594	0.0105312	0.00224399	0.0164514	0.000939576	0.102303	0.0211551	0.155095	0.0835072	0.102303	0.00422188	0.000899594	0.00707691	0.00150794	0.0164514	0.000631388	0.102303	0.0144538	0.157689	0.0580084	0.102303
Var6	m89	HO	7	0.33245	0.0365902	0.829277	0.0912721	0.110079	0.0100488	-3.18362	0.860467	1.03776	0.893111	0.05325	0.33245	0.0365902	0.557268	0.0613342	0.110079	0.00675271	-3.18362	0.587895	1.05512	0.620401	0.0771726	1.11362	0.154345	0.00310666	0.00038659	0.00774939	0.000964327	0.00210299	0.000293761	0.0277869	0.00909118	0.0198259	0.0261087	0.0277869	0.00310666	0.00038659	0.00520753	0.000648021	0.00210299	0.000197405	0.0277869	0.00621135	0.0201574	0.0181365	0.0277869
Var7	m90	HO	7	0.309441	0.0341418	0.771882	0.0851646	0.110351	0.00940383	-3.18039	0.802888	1.04033	0.835789	0.0564787	0.309441	0.0341418	0.518699	0.05723	0.110351	0.0063193	-3.18039	0.548556	1.05772	0.580582	0.0804014	1.11965	0.160803	0.00482241	0.000952913	0.0120292	0.00237699	0.00332016	0.000524197	0.0435457	0.022409	0.0313008	0.0465893	0.0435457	0.00482241	0.000952913	0.00808354	0.00159732	0.00332016	0.000352256	0.0435457	0.0153105	0.0318241	0.0323634	0.0435457
Var8	m91	HO	7	0.351044	0.0385402	0.87566	0.0961363	0.109788	0.0105616	-3.18771	0.906324	1.03502	0.938693	0.0491667	0.351044	0.0385402	0.588437	0.0646029	0.109788	0.00709735	-3.18771	0.619226	1.05233	0.652065	0.0730894	1.10815	0.146179	0.0033631	0.00113145	0.00838906	0.00282233	0.00308506	0.000588095	0.0411159	0.0266075	0.0290844	0.0522684	0.0411159	0.0033631	0.00113145	0.00563739	0.00189658	0.00308506	0.000395196	0.0411159	0.018179	0.0295707	0.0363084	0.0411159
Var1.1	WT	HO	8	0.400891	0.0425237	1	0.106073	0.106087	0.0112641	-3.23748	1	1.00013	1.00112	-0.000604654	0.400891	0.0425237	0.671992	0.0712801	0.106087	0.00756939	-3.23748	0.683228	1.01686	0.695433	0.023318	1.03517	0.046636	0.00395062	0.00138942	0.00985459	0.00346583	0.00382642	0.000779374	0.0508539	0.032674	0.0360735	0.0692688	0.0508539	0.00395062	0.00138942	0.00662221	0.00232901	0.00382642	0.000523734	0.0508539	0.0223238	0.0366766	0.0481177	0.0508539
Var17	TATA.129	HO	3	0.249696	0.0255548	0.622851	0.063745	0.102348	0.00652488	-3.28855	0.600955	0.964888	0.579915	-0.051675	0.249696	0.0255548	0.418551	0.0428361	0.102348	0.00438467	-3.28855	0.410589	0.981021	0.402839	-0.0277523	0.962547	-0.0555047	0.00142443	0.000282262	0.00355315	0.000704087	0.00153608	0.000167649	0.0216321	0.00663777	0.0144814	0.0149003	0.0216321	0.00142443	0.000282262	0.00238769	0.000473141	0.00153608	0.000112659	0.0216321	0.00453512	0.0147235	0.0103505	0.0216321
Var23	m75.TATA.42	HO	3	0.052992	0.00462968	0.132186	0.0115485	0.0873303	0.00101268	-3.5201	0.108873	0.823305	0.0900045	-0.28323	0.052992	0.00462968	0.0888277	0.00776048	0.0873303	0.000680514	-3.5201	0.0743851	0.837071	0.0625218	-0.259307	0.70331	-0.518615	0.000748304	0.000385007	0.0018666	0.000960378	0.00654244	0.000157311	0.109001	0.00905395	0.0616787	0.0139814	0.109001	0.000748304	0.000385007	0.00125434	0.000645367	0.00654244	0.000105712	0.109001	0.00618591	0.06271	0.00971221	0.109001
Var16	TATA.26	HO	3	0.0829859	0.00220357	0.207004	0.00549668	0.0265512	0.00014648	-5.23763	0.0518199	0.250311	0.0130188	-2.00076	0.0829859	0.00220357	0.139105	0.00369373	0.0265512	9.84334e-05	-5.23763	0.0354048	0.254496	0.00904351	-1.97684	0.0650005	-3.95367	0.000151562	0.000165685	0.000378062	0.000413293	0.00194691	2.19333e-05	0.104764	0.00389631	0.0183545	0.00194938	0.104764	0.000151562	0.000165685	0.000254055	0.000277729	0.00194691	1.4739e-05	0.104764	0.00266207	0.0186614	0.00135414	0.104764
Var22	TATA.81	HO	3	0.159845	0.0126495	0.398723	0.0315534	0.0791415	0.0025032	-3.66118	0.297469	0.746105	0.222478	-0.42431	0.159845	0.0126495	0.267939	0.0212036	0.0791415	0.00168213	-3.66118	0.203239	0.75858	0.154545	-0.400387	0.576867	-0.800774	0.000848662	0.000752979	0.00211694	0.00187826	0.00482031	0.000304257	0.087019	0.0177073	0.0454434	0.0270416	0.087019	0.000848662	0.000752979	0.00142257	0.00126218	0.00482031	0.000204459	0.087019	0.0120981	0.0462032	0.0187845	0.087019
