# Supplementary material for: Fitness effects of altering gene expression noise in Saccharomyces cerevisiae
Source: eLife. 2018 Aug 20;7:e37272. doi: 10.7554/eLife.37272 (PMC6133559; doi:10.7554/eLife.37272)
Supplement: Figure 4—source data 1. — Competitive fitness was measured by pyrosequencing and analyzed using the R script provided in Supplementary file 3. Data used to make Figure 4. [file elife-37272-fig4-data1.xlsx]

## Sheet: Legend
Figure 4 - Source Data 1
Fitness measured in direct competition assays between strains with low and high values of expression noise.
Competitive fitness was measured by pyrosequencing and analyzed using the R script provided in Supplementary File 3.
These data were used to make Figure 4.
Headers	Description
PAIR	Identifier for the pair of PTDH3 alleles competed against each other.
UNIQUE.PAIR	Identifier for the pair of strains competed against each other. Pairs with the same letter have the same genotypes, but the strains were isolated from different colonies after transformation.
VARIANT.ID	Unique name for each PTDH3 allele. See Figure 2-3 - Source Data 1 for further details.
NICKNAME	Arbitrary name referring to the mutation(s) carried by the PTDH3 allele.
STRAIN	Name of yeast strain carrying the corresponding PTDH3 allele at the native TDH3 locus.
#COPY	Expected number of copies of the TDH3 gene.
MUTATION.TYPE	Type of mutation(s) in PTDH3.
PROMOTER.GENOTYPE	Short description of the PTDH3 alleles. Positions in PTDH3 are expressed relative to the start codon. Nucleotides written in capital letters correspond to WT alleles and lowercase letters correspond to mutant allele. Multiple mutations in the same TDH3 promoter are separated by ";". Different copies of the PTDH3-YFP-TCYC1 construct are separated by "_".
MEDIAN.EXPRESSION	Median expression level measured when the corresponding PTDH3-YFP allele was inserted at HO.
SD.EXPRESSION	Standard deviation of expression measured when the corresponding PTDH3-YFP allele was inserted at HO.
CV.EXPRESSION	Standard deviation divided by median expression measured when the corresponding PTDH3-YFP allele was inserted at HO.
FANO.EXPRESSION	Noise strength (variance divided by median expression) measured when the corresponding PTDH3-YFP allele was inserted at HO.
TARGET.SITE	Variable position in PTDH3 interrogated by pyrosequencing.
PCR	Identifier for the pair of primers used in the PCR reaction.
PRIMER.F	Forward primer used in the PCR reaction.
PRIMER.R	Reverse primer used in the PCR reaction.
PRIMER.S	Sequencing primer used for pyrosequencing.
TARGET.SEQUENCE	Expected sequence including nucleotides at variable site.
N.REP	Number of replicate populations for the pair of strains.
FITNESS_MEAN	Average fitness of the high noise strain relative to the low noise strain measured among all replicates sharing the same genotypes (same PAIR).
FITNESS_SD	Standard deviation of fitness of the high noise strain relative to the low noise strain measured among all replicates sharing the same genotypes (same PAIR).
P.VAL.FITNESS	P-value of a t-test used to compare the fitness among replicates to a value of 0.

## Sheet: Data
PAIR		LOW NOISE VARIANT										HIGH NOISE VARIANT										PYROSEQUENCING						FITNESS
PAIR	UNIQUE.PAIR	VARIANT.ID	NICKNAME	STRAIN	#COPY	MUTATION.TYPE	PROMOTER.GENOTYPE	MEDIAN.EXPRESSION	SD.EXPRESSION	CV.EXPRESSION	FANO.EXPRESSION	VARIANT.ID	NICKNAME	STRAIN	#COPY	MUTATION.TYPE	PROMOTER.GENOTYPE	MEDIAN.EXPRESSION	SD.EXPRESSION	CV.EXPRESSION	FANO.EXPRESSION	TARGET.SITE	PCR	PRIMER.F	PRIMER.R	PRIMER.S	TARGET.SEQUENCE	N.REP	FITNESS_MEAN	FITNESS_SD	P.VAL.FITNESS
A	A.1	Var23	m75.TATA.42	Y2888	Single	TFBS.TATA	GCR1.1(C485t); TATAbox(141TATcTAAA)	0.127636	0.283736	2.20818	0.622363	Var14	m63.m90	Y2865	Single	TFBS	RAP1(G510a); GCR1.2(C444t)	0.113094	0.542226	4.75593	2.55806	RAP1(G510a)	A	3166	3168	3172	GAC/TACCTACG	8	1.00371	0.000724819	1.10846e-11
A	A.2	Var23	m75.TATA.42	Y2850	Single	TFBS.TATA	GCR1.1(C485t); TATAbox(141TATcTAAA)	0.127636	0.283736	2.20818	0.622363	Var14	m63.m90	Y2866	Single	TFBS	RAP1(G510a); GCR1.2(C444t)	0.113094	0.542226	4.75593	2.55806	RAP1(G510a)	A	3166	3168	3172	GAC/TACCTACG	8	1.00371	0.000724819	1.10846e-11
B	B.1	Var16	TATA.26	Y2879	Single	TATA	TATAbox(141TcTcgttt)	0.192419	0.266042	1.37309	0.362784	Var15	m63.m89	Y2868	Single	TFBS	RAP1(G510a); GCR1.2(C447t)	0.184194	0.664098	3.57624	2.35575	RAP1(G510a)	A	3166	3168	3172	GAC/TACCTACG	8	1.00372	0.000691104	6.44084e-12
B	B.2	Var16	TATA.26	Y2880	Single	TATA	TATAbox(141TcTcgttt)	0.192419	0.266042	1.37309	0.362784	Var15	m63.m89	Y2869	Single	TFBS	RAP1(G510a); GCR1.2(C447t)	0.184194	0.664098	3.57624	2.35575	RAP1(G510a)	A	3166	3168	3172	GAC/TACCTACG	8	1.00372	0.000691104	6.44084e-12
C	C.1	Var17	TATA.129	Y2894	Single	TATA	TATAbox(141TATATAgA)	0.600103	0.670956	1.10926	0.738403	Var4	m66	Y1209	Single	TFBS	RAP1(G505a)	0.582976	0.867819	1.57719	1.45017	RAP1(G505a)	A	3166	3168	3173	C/TCAGACACCT	8	1.00189	0.00133233	0.000129344
C	C.2	Var17	TATA.129	Y2895	Single	TATA	TATAbox(141TATATAgA)	0.600103	0.670956	1.10926	0.738403	Var4	m66	Y1196	Single	TFBS	RAP1(G505a)	0.582976	0.867819	1.57719	1.45017	RAP1(G505a)	A	3166	3168	3173	C/TCAGACACCT	8	1.00189	0.00133233	0.000129344
D	D.1	Var48	m66_TATA.129	Y3064	Double	TFBS_TATA	RAP1(G505a)_TATAbox(141TATATAgA)	0.960112	1.10764	1.06294	1.08478	Var40	m63.m89_m63.m89	Y3047	Double	TFBS_TFBS	RAP1(G510a); GCR1.2(C447t)_RAP1(G510a); GCR1.2(C447t)	0.899645	1.37371	1.55423	2.17322	RAP1(G505a)	A	3166	3168	3173	C/TCAGAC/TACCT	16	0.999039	0.00119429	0.0113633
E	E.1	Var49	m184	Y1191	Single	OTHER	G220a	1.0131	0.907346	0.895614	0.812632	Var50	m154	Y1193	Single	OTHER	G295a	1.01804	1.07146	1.05247	1.12768	G220a	C	3176	3167	3177	TCTG/ACTCTCT	7	0.999012	0.00117266	0.0113633
E	E.2	Var49	m184	Y1192	Single	OTHER	G220a	1.0131	0.907346	0.895614	0.812632	Var50	m154	Y1194	Single	OTHER	G295a	1.01804	1.07146	1.05247	1.12768	G220a	C	3176	3167	3177	TCTG/ACTCTCT	8	0.999012	0.00117266	0.0113633
