# Supplementary material for: Fitness effects of altering gene expression noise in Saccharomyces cerevisiae
Source: eLife. 2018 Aug 20;7:e37272. doi: 10.7554/eLife.37272 (PMC6133559; doi:10.7554/eLife.37272)
Supplement: Figure 5—figure supplement 1—source data 1. — Doubling time was determined from time-lapse microscopy data. These data were used to make Figure 5—figure supplement 1. [file elife-37272-fig5-figsupp1-data1.xlsx]

## Sheet: Legend
Figure 5 - figure supplement 1 - Source Data 1
Single-cell measures of doubling time in four strains with different median levels and noise of TDH3 expression.
Doubling time was determined from time-lapse microscopy data.
These data were used to make Figure 5 - figure supplement 1.
Headers	Description
Strain	Name of yeast strain.
Position	Identifier for the pair of strains competed against each other. Pairs with the same letter have the same genotypes, but the strains were isolated from different colonies after transformation.
Cell	Unique name for each cell. Note that a new name is assigned to both mother and daughter cells after each division event.
Lineage	Name of ancestral cell on first frame.
Mother	Name of cell that produced the current cell by mitosis.
Status	Indicate whether the current cell is a mother cell or a daughter cell (bud).
Birth.Frame	Frame where the current cell first appeared by budding of a mother cell.
Division.Frame	Frame where the current cell started to bud and was assigned a new name.
Lost	Indicate whether the current cell disappeared from the field of view before budding and on which frame.

## Sheet: Data
Strain	Position	Cell	Lineage	Mother	Status	Birth.Frame	Division.Frame	Lost
YPW3064	1	1	1	NA	NA	NA	5	No
YPW3064	1	1001	1	1	Mother	5	24	No
YPW3064	1	1002	1	1	Daugther	5	28	No
YPW3064	1	1003	1	1001	Mother	24	40	No
YPW3064	1	1004	1	1001	Daugther	24	43	No
YPW3064	1	1005	1	1003	Mother	40	55	No
YPW3064	1	1006	1	1003	Daugther	40	55	No
YPW3064	1	1007	1	1005	Mother	55	69	No
YPW3064	1	1008	1	1005	Daugther	55	73	No
YPW3064	1	1009	1	1007	Mother	69	NA	No
YPW3064	1	1010	1	1007	Daugther	69	NA	No
YPW3064	1	1011	1	1008	Mother	73	NA	No
YPW3064	1	1012	1	1008	Daugther	73	NA	No
YPW3064	1	1013	1	1006	Mother	55	72	No
YPW3064	1	1014	1	1006	Daugther	55	76	No
YPW3064	1	1015	1	1013	Mother	72	NA	No
YPW3064	1	1016	1	1013	Daugther	72	NA	No
YPW3064	1	1017	1	1014	Mother	76	NA	No
YPW3064	1	1018	1	1014	Daugther	76	NA	No
YPW3064	1	1019	1	1004	Mother	43	61	No
YPW3064	1	1020	1	1004	Daugther	43	64	No
YPW3064	1	1021	1	1019	Mother	61	NA	No
YPW3064	1	1022	1	1019	Daugther	61	NA	No
YPW3064	1	1023	1	1020	Mother	64	NA	No
YPW3064	1	1024	1	1020	Daugther	64	NA	No
YPW3064	1	1025	1	1002	Mother	28	47	No
YPW3064	1	1026	1	1002	Daugther	28	49	No
YPW3064	1	1027	1	1025	Mother	47	64	No
YPW3064	1	1028	1	1025	Daugther	47	72	No
YPW3064	1	1029	1	1027	Mother	64	78	No
YPW3064	1	1030	1	1027	Daugther	64	NA	No
YPW3064	1	1031	1	1029	Mother	78	NA	No
YPW3064	1	1032	1	1029	Daugther	78	NA	No
YPW3064	1	1033	1	1028	Mother	72	NA	No
YPW3064	1	1034	1	1028	Daugther	72	NA	No
YPW3064	1	1035	1	1026	Mother	49	67	No
YPW3064	1	1036	1	1026	Daugther	49	78	No
YPW3064	1	1037	1	1035	Mother	67	NA	No
YPW3064	1	1038	1	1035	Daugther	67	NA	No
YPW3064	1	1039	1	1036	Mother	78	NA	No
YPW3064	1	1040	1	1036	Daugther	78	NA	No
YPW3064	1	2	2	NA	NA	NA	16	No
YPW3064	1	2001	2	2	Mother	16	33	No
YPW3064	1	2002	2	2	Daugther	16	39	No
YPW3064	1	2003	2	2001	Mother	33	50	No
YPW3064	1	2004	2	2001	Daugther	33	55	No
YPW3064	1	2005	2	2003	Mother	50	64	No
YPW3064	1	2006	2	2003	Daugther	50	72	No
YPW3064	1	2007	2	2005	Mother	64	NA	No
YPW3064	1	2008	2	2005	Daugther	64	NA	No
YPW3064	1	2009	2	2006	Mother	72	NA	No
YPW3064	1	2010	2	2006	Daugther	72	NA	No
YPW3064	1	2011	2	2004	Mother	55	70	No
YPW3064	1	2012	2	2004	Daugther	55	NA	No
YPW3064	1	2013	2	2011	Mother	70	NA	No
YPW3064	1	2014	2	2011	Daugther	70	NA	No
YPW3064	1	2015	2	2002	Mother	39	55	No
YPW3064	1	2016	2	2002	Daugther	39	68	No
YPW3064	1	2017	2	2015	Mother	55	74	No
YPW3064	1	2018	2	2015	Daugther	55	80	No
YPW3064	1	2019	2	2017	Mother	74	NA	No
YPW3064	1	2020	2	2017	Daugther	74	NA	No
YPW3064	1	2021	2	2018	Mother	80	NA	No
YPW3064	1	2022	2	2018	Daugther	80	NA	No
YPW3064	1	2023	2	2016	Mother	68	NA	No
YPW3064	1	2024	2	2016	Daugther	68	NA	No
YPW3064	1	3	3	NA	NA	NA	17	No
YPW3064	1	3001	3	3	Mother	17	30	No
YPW3064	1	3002	3	3	Daugther	17	31	No
YPW3064	1	3003	3	3001	Mother	30	43	No
YPW3064	1	3004	3	3001	Daugther	30	45	No
YPW3064	1	3005	3	3003	Mother	43	57	No
YPW3064	1	3006	3	3003	Daugther	43	57	No
YPW3064	1	3007	3	3005	Mother	57	72	No
YPW3064	1	3008	3	3005	Daugther	57	74	No
YPW3064	1	3009	3	3007	Mother	72	NA	No
YPW3064	1	3010	3	3007	Daugther	72	NA	No
YPW3064	1	3011	3	3008	Mother	74	NA	No
YPW3064	1	3012	3	3008	Daugther	74	NA	No
YPW3064	1	3013	3	3006	Mother	57	71	No
YPW3064	1	3014	3	3006	Daugther	57	NA	No
YPW3064	1	3015	3	3013	Mother	71	NA	No
YPW3064	1	3016	3	3013	Daugther	71	NA	No
YPW3064	1	3017	3	3021	Mother	73	NA	No
YPW3064	1	3018	3	3021	Daugther	73	NA	No
YPW3064	1	3019	3	3004	Mother	45	59	No
YPW3064	1	3020	3	3004	Daugther	45	64	No
YPW3064	1	3021	3	3019	Mother	59	73	No
YPW3064	1	3022	3	3019	Daugther	59	80	No
YPW3064	1	3023	3	3022	Mother	80	NA	No
YPW3064	1	3024	3	3022	Daugther	80	NA	No
YPW3064	1	3025	3	3020	Mother	64	77	No
YPW3064	1	3026	3	3020	Daugther	64	NA	No
YPW3064	1	3027	3	3025	Mother	77	NA	No
YPW3064	1	3028	3	3025	Daugther	77	NA	No
YPW3064	1	3029	3	3002	Mother	31	52	No
YPW3064	1	3030	3	3002	Daugther	31	64	No
YPW3064	1	3031	3	3029	Mother	52	66	No
YPW3064	1	3032	3	3029	Daugther	52	NA	No
YPW3064	1	3033	3	3031	Mother	66	NA	No
YPW3064	1	3034	3	3031	Daugther	66	NA	No
YPW3064	1	3035	3	3030	Mother	64	NA	No
YPW3064	1	3036	3	3030	Daugther	64	NA	No
YPW3064	1	4	4	NA	NA	NA	17	No
YPW3064	1	4001	4	4	Mother	17	31	No
YPW3064	1	4002	4	4	Daugther	17	36	No
YPW3064	1	4003	4	4001	Mother	31	46	No
YPW3064	1	4004	4	4001	Daugther	31	51	No
YPW3064	1	4005	4	4003	Mother	46	59	No
YPW3064	1	4006	4	4003	Daugther	46	63	No
YPW3064	1	4007	4	4005	Mother	59	71	No
YPW3064	1	4008	4	4005	Daugther	59	78	No
YPW3064	1	4009	4	4007	Mother	71	NA	No
YPW3064	1	4010	4	4007	Daugther	71	NA	No
YPW3064	1	4011	4	4008	Mother	78	NA	No
YPW3064	1	4012	4	4008	Daugther	78	NA	No
YPW3064	1	4013	4	4006	Mother	63	NA	No
YPW3064	1	4014	4	4006	Daugther	63	NA	No
YPW3064	1	4015	4	4004	Mother	51	66	No
YPW3064	1	4016	4	4004	Daugther	51	NA	No
YPW3064	1	4017	4	4015	Mother	66	NA	No
YPW3064	1	4018	4	4015	Daugther	66	NA	No
YPW3064	1	4019	4	4002	Mother	36	51	No
YPW3064	1	4020	4	4002	Daugther	36	62	No
YPW3064	1	4021	4	4019	Mother	51	64	No
YPW3064	1	4022	4	4019	Daugther	51	NA	No
YPW3064	1	4023	4	4021	Mother	64	77	No
YPW3064	1	4024	4	4021	Daugther	64	NA	No
YPW3064	1	4025	4	4023	Mother	77	NA	No
YPW3064	1	4026	4	4023	Daugther	77	NA	No
YPW3064	1	4027	4	4020	Mother	62	74	No
YPW3064	1	4028	4	4020	Daugther	62	NA	No
YPW3064	1	4029	4	4027	Mother	74	NA	No
YPW3064	1	4030	4	4027	Daugther	74	NA	No
YPW3064	1	5	5	NA	NA	NA	11	No
YPW3064	1	5001	5	5	Mother	11	25	No
YPW3064	1	5002	5	5	Daugther	11	29	No
YPW3064	1	5003	5	5001	Mother	25	38	No
YPW3064	1	5004	5	5001	Daugther	25	40	No
YPW3064	1	5005	5	5003	Mother	38	51	No
YPW3064	1	5006	5	5003	Daugther	38	56	No
YPW3064	1	5007	5	5005	Mother	51	64	No
YPW3064	1	5008	5	5005	Daugther	51	79	No
YPW3064	1	5009	5	5007	Mother	64	76	No
YPW3064	1	5010	5	5007	Daugther	64	NA	No
YPW3064	1	5011	5	5009	Mother	76	NA	No
YPW3064	1	5012	5	5009	Daugther	76	NA	No
YPW3064	1	5013	5	5008	Mother	79	NA	No
YPW3064	1	5014	5	5008	Daugther	79	NA	No
YPW3064	1	5015	5	5006	Mother	56	72	No
YPW3064	1	5016	5	5006	Daugther	56	78	No
YPW3064	1	5017	5	5015	Mother	72	NA	No
YPW3064	1	5018	5	5015	Daugther	72	NA	No
YPW3064	1	5019	5	5016	Mother	78	NA	No
YPW3064	1	5020	5	5016	Daugther	78	NA	No
YPW3064	1	5021	5	5004	Mother	40	54	No
YPW3064	1	5022	5	5004	Daugther	40	63	No
YPW3064	1	5023	5	5021	Mother	54	67	No
YPW3064	1	5024	5	5021	Daugther	54	NA	No
YPW3064	1	5025	5	5023	Mother	67	NA	No
YPW3064	1	5026	5	5023	Daugther	67	NA	No
YPW3064	1	5027	5	5022	Mother	63	77	No
YPW3064	1	5028	5	5022	Daugther	63	80	No
YPW3064	1	5029	5	5027	Mother	77	NA	No
YPW3064	1	5030	5	5027	Daugther	77	NA	No
YPW3064	1	5031	5	5028	Mother	80	NA	No
YPW3064	1	5032	5	5028	Daugther	80	NA	No
YPW3064	1	5033	5	5002	Mother	29	44	No
YPW3064	1	5034	5	5002	Daugther	29	52	No
YPW3064	1	5035	5	5033	Mother	44	59	No
YPW3064	1	5036	5	5033	Daugther	44	68	No
YPW3064	1	5037	5	5035	Mother	59	NA	No
YPW3064	1	5038	5	5035	Daugther	59	NA	No
YPW3064	1	5039	5	5036	Mother	68	NA	No
YPW3064	1	5040	5	5036	Daugther	68	NA	No
YPW3064	1	5041	5	5034	Mother	52	NA	No
YPW3064	1	5042	5	5034	Daugther	52	NA	No
YPW3064	1	6	6	NA	NA	NA	2	No
YPW3064	1	6001	6	6	Mother	2	18	No
YPW3064	1	6002	6	6	Daugther	2	30	No
YPW3064	1	6003	6	6001	Mother	18	33	No
YPW3064	1	6004	6	6001	Daugther	18	42	No
YPW3064	1	6005	6	6003	Mother	33	54	No
YPW3064	1	6006	6	6003	Daugther	33	53	No
YPW3064	1	6007	6	6005	Mother	54	74	No
YPW3064	1	6008	6	6005	Daugther	54	77	No
YPW3064	1	6009	6	6007	Mother	74	NA	No
YPW3064	1	6010	6	6007	Daugther	74	NA	No
YPW3064	1	6011	6	6008	Mother	77	NA	No
YPW3064	1	6012	6	6008	Daugther	77	NA	No
YPW3064	1	6013	6	6006	Mother	53	73	No
YPW3064	1	6014	6	6006	Daugther	53	76	No
YPW3064	1	6015	6	6013	Mother	73	NA	No
YPW3064	1	6016	6	6013	Daugther	73	NA	No
YPW3064	1	6017	6	6014	Mother	76	NA	No
YPW3064	1	6018	6	6014	Daugther	76	NA	No
YPW3064	1	6019	6	6004	Mother	42	59	No
YPW3064	1	6020	6	6004	Daugther	42	67	No
YPW3064	1	6021	6	6019	Mother	59	76	No
YPW3064	1	6022	6	6019	Daugther	59	NA	No
YPW3064	1	6023	6	6021	Mother	76	NA	No
YPW3064	1	6024	6	6021	Daugther	76	NA	No
YPW3064	1	6025	6	6020	Mother	67	NA	No
YPW3064	1	6026	6	6020	Daugther	67	NA	No
YPW3064	1	6027	6	6002	Mother	30	49	No
YPW3064	1	6028	6	6002	Daugther	30	50	No
YPW3064	1	6029	6	6027	Mother	49	64	No
YPW3064	1	6030	6	6027	Daugther	49	67	No
YPW3064	1	6031	6	6029	Mother	64	78	No
YPW3064	1	6032	6	6029	Daugther	64	NA	No
YPW3064	1	6033	6	6031	Mother	78	NA	No
YPW3064	1	6034	6	6031	Daugther	78	NA	No
YPW3064	1	6035	6	6030	Mother	67	NA	No
YPW3064	1	6036	6	6030	Daugther	67	NA	No
YPW3064	1	6037	6	6028	Mother	50	67	No
YPW3064	1	6038	6	6028	Daugther	50	NA	No
YPW3064	1	6039	6	6037	Mother	67	NA	No
YPW3064	1	6040	6	6037	Daugther	67	NA	No
YPW3064	1	7	7	NA	NA	NA	12	No
YPW3064	1	7001	7	7	Mother	12	26	No
YPW3064	1	7002	7	7	Daugther	12	26	No
YPW3064	1	7003	7	7001	Mother	26	40	No
YPW3064	1	7004	7	7001	Daugther	26	41	No
YPW3064	1	7005	7	7003	Mother	40	54	No
YPW3064	1	7006	7	7003	Daugther	40	55	No
YPW3064	1	7007	7	7005	Mother	54	69	No
YPW3064	1	7008	7	7005	Daugther	54	72	No
YPW3064	1	7009	7	7007	Mother	69	NA	No
YPW3064	1	7010	7	7007	Daugther	69	NA	No
YPW3064	1	7011	7	7008	Mother	72	NA	No
YPW3064	1	7012	7	7008	Daugther	72	NA	No
YPW3064	1	7013	7	7006	Mother	55	73	No
YPW3064	1	7014	7	7006	Daugther	55	77	No
YPW3064	1	7015	7	7013	Mother	73	NA	No
YPW3064	1	7016	7	7013	Daugther	73	NA	No
YPW3064	1	7017	7	7014	Mother	77	NA	No
YPW3064	1	7018	7	7014	Daugther	77	NA	No
YPW3064	1	7019	7	7004	Mother	41	68	No
YPW3064	1	7020	7	7004	Daugther	41	69	No
YPW3064	1	7021	7	7019	Mother	68	NA	No
YPW3064	1	7022	7	7019	Daugther	68	NA	No
YPW3064	1	7023	7	7020	Mother	69	NA	No
YPW3064	1	7024	7	7020	Daugther	69	NA	No
YPW3064	1	7025	7	7002	Mother	26	41	No
YPW3064	1	7026	7	7002	Daugther	26	46	No
YPW3064	1	7027	7	7025	Mother	41	55	No
YPW3064	1	7028	7	7025	Daugther	41	60	No
YPW3064	1	7029	7	7027	Mother	55	72	No
YPW3064	1	7030	7	7027	Daugther	55	77	No
YPW3064	1	7031	7	7029	Mother	72	NA	No
YPW3064	1	7032	7	7029	Daugther	72	NA	No
YPW3064	1	7033	7	7030	Mother	77	NA	No
YPW3064	1	7034	7	7030	Daugther	77	NA	No
YPW3064	1	7035	7	7028	Mother	60	80	No
YPW3064	1	7036	7	7028	Daugther	60	NA	No
YPW3064	1	7037	7	7035	Mother	80	NA	No
YPW3064	1	7038	7	7035	Daugther	80	NA	No
YPW3064	1	7039	7	7026	Mother	46	62	No
YPW3064	1	7040	7	7026	Daugther	46	74	No
YPW3064	1	7041	7	7039	Mother	62	NA	No
YPW3064	1	7042	7	7039	Daugther	62	NA	No
YPW3064	1	7043	7	7040	Mother	74	NA	No
YPW3064	1	7044	7	7040	Daugther	74	NA	No
YPW3064	1	8	8	NA	NA	NA	23	No
YPW3064	1	8001	8	8	Mother	23	37	No
YPW3064	1	8002	8	8	Daugther	23	40	No
YPW3064	1	8003	8	8001	Mother	37	52	No
YPW3064	1	8004	8	8001	Daugther	37	60	No
YPW3064	1	8005	8	8003	Mother	52	67	No
YPW3064	1	8006	8	8003	Daugther	52	NA	No
YPW3064	1	8007	8	8005	Mother	67	80	No
YPW3064	1	8008	8	8005	Daugther	67	NA	No
YPW3064	1	8009	8	8007	Mother	80	NA	No
YPW3064	1	8010	8	8007	Daugther	80	NA	No
YPW3064	1	8011	8	8004	Mother	60	78	No
YPW3064	1	8012	8	8004	Daugther	60	NA	No
YPW3064	1	8013	8	8011	Mother	78	NA	No
YPW3064	1	8014	8	8011	Daugther	78	NA	No
YPW3064	1	8015	8	8002	Mother	40	56	No
YPW3064	1	8016	8	8002	Daugther	40	65	No
YPW3064	1	8017	8	8015	Mother	56	73	No
YPW3064	1	8018	8	8015	Daugther	56	80	No
YPW3064	1	8019	8	8017	Mother	73	NA	No
YPW3064	1	8020	8	8017	Daugther	73	NA	No
YPW3064	1	8021	8	8018	Mother	80	NA	No
YPW3064	1	8022	8	8018	Daugther	80	NA	No
YPW3064	1	8023	8	8016	Mother	65	79	No
YPW3064	1	8024	8	8016	Daugther	65	NA	No
YPW3064	1	8025	8	8023	Mother	79	NA	No
YPW3064	1	8026	8	8023	Daugther	79	NA	No
YPW3064	2	1	1	NA	NA	NA	11	No
YPW3064	2	1001	1	1	Mother	11	26	No
YPW3064	2	1002	1	1	Daughter	11	29	No
YPW3064	2	1003	1	1001	Mother	26	39	No
YPW3064	2	1004	1	1001	Daughter	26	41	No
YPW3064	2	1005	1	1003	Mother	39	54	No
YPW3064	2	1006	1	1003	Daughter	39	56	No
YPW3064	2	1007	1	1005	Mother	54	68	No
YPW3064	2	1008	1	1005	Daughter	54	68	No
YPW3064	2	1009	1	1007	Mother	68	NA	No
YPW3064	2	1010	1	1007	Daughter	68	NA	No
YPW3064	2	1011	1	1008	Mother	68	NA	No
YPW3064	2	1012	1	1008	Daughter	68	NA	No
YPW3064	2	1013	1	1006	Mother	56	79	No
YPW3064	2	1014	1	1006	Daughter	56	NA	No
YPW3064	2	1015	1	1013	Mother	79	NA	No
YPW3064	2	1016	1	1013	Daughter	79	NA	No
YPW3064	2	1017	1	1004	Mother	41	58	No
YPW3064	2	1018	1	1004	Daughter	41	69	No
YPW3064	2	1019	1	1017	Mother	58	72	No
YPW3064	2	1020	1	1017	Daughter	58	NA	No
YPW3064	2	1021	1	1019	Mother	72	NA	No
YPW3064	2	1022	1	1019	Daughter	72	NA	No
YPW3064	2	1023	1	1018	Mother	69	NA	No
YPW3064	2	1024	1	1018	Daughter	69	NA	No
YPW3064	2	1025	1	1002	Mother	29	48	No
YPW3064	2	1026	1	1002	Daughter	29	56	No
YPW3064	2	1027	1	1025	Mother	48	67	No
YPW3064	2	1028	1	1025	Daughter	48	74	No
YPW3064	2	1029	1	1027	Mother	67	NA	No
YPW3064	2	1030	1	1027	Daughter	67	NA	No
YPW3064	2	1031	1	1028	Mother	74	NA	No
YPW3064	2	1032	1	1028	Daughter	74	NA	No
YPW3064	2	1033	1	1026	Mother	56	71	No
YPW3064	2	1034	1	1026	Daughter	56	77	No
YPW3064	2	1035	1	1033	Mother	71	NA	No
YPW3064	2	1036	1	1033	Daughter	71	NA	No
YPW3064	2	1037	1	1034	Mother	77	NA	No
YPW3064	2	1038	1	1034	Daughter	77	NA	No
YPW3064	2	2	2	NA	NA	NA	8	No
YPW3064	2	2001	2	2	Mother	8	23	No
YPW3064	2	2002	2	2	Daughter	8	27	No
YPW3064	2	2003	2	2001	Mother	23	41	No
YPW3064	2	2004	2	2001	Daughter	23	49	No
YPW3064	2	2005	2	2003	Mother	41	56	No
YPW3064	2	2006	2	2003	Daughter	41	68	No
YPW3064	2	2007	2	2005	Mother	56	69	No
YPW3064	2	2008	2	2005	Daughter	56	NA	No
YPW3064	2	2009	2	2007	Mother	69	NA	No
YPW3064	2	2010	2	2007	Daughter	69	NA	No
YPW3064	2	2011	2	2006	Mother	68	NA	No
YPW3064	2	2012	2	2006	Daughter	68	NA	No
YPW3064	2	2013	2	2004	Mother	49	64	No
YPW3064	2	2014	2	2004	Daughter	49	NA	No
YPW3064	2	2015	2	2013	Mother	64	NA	No
YPW3064	2	2016	2	2013	Daughter	64	NA	No
YPW3064	2	2017	2	2002	Mother	27	52	No
YPW3064	2	2018	2	2002	Daughter	27	NA	47
YPW3064	2	2019	2	2017	Mother	52	72	No
YPW3064	2	2020	2	2017	Daughter	52	NA	No
YPW3064	2	2021	2	2019	Mother	72	NA	No
YPW3064	2	2022	2	2019	Daughter	72	NA	No
YPW3064	2	3	3	NA	NA	NA	15	No
YPW3064	2	3001	3	3	Mother	15	41	No
YPW3064	2	3002	3	3	Daughter	15	41	No
YPW3064	2	3003	3	3001	Mother	41	57	No
YPW3064	2	3004	3	3001	Daughter	41	73	No
YPW3064	2	3005	3	3003	Mother	57	78	No
YPW3064	2	3006	3	3003	Daughter	57	NA	No
YPW3064	2	3007	3	3005	Mother	78	NA	No
YPW3064	2	3008	3	3005	Daughter	78	NA	No
YPW3064	2	3009	3	3004	Mother	73	NA	No
YPW3064	2	3010	3	3004	Daughter	73	NA	No
YPW3064	2	3011	3	3002	Mother	41	55	No
YPW3064	2	3012	3	3002	Daughter	41	63	No
YPW3064	2	3013	3	3011	Mother	55	67	No
YPW3064	2	3014	3	3011	Daughter	55	78	No
YPW3064	2	3015	3	3013	Mother	67	NA	No
YPW3064	2	3016	3	3013	Daughter	67	NA	No
YPW3064	2	3017	3	3014	Mother	78	NA	No
YPW3064	2	3018	3	3014	Daughter	78	NA	No
YPW3064	2	3019	3	3012	Mother	63	77	No
YPW3064	2	3020	3	3012	Daughter	63	NA	No
YPW3064	2	3021	3	3019	Mother	77	NA	No
YPW3064	2	3022	3	3019	Daughter	77	NA	No
YPW3064	2	4	4	NA	NA	NA	7	No
YPW3064	2	4001	4	4	Mother	7	23	No
YPW3064	2	4002	4	4	Daughter	7	26	No
YPW3064	2	4003	4	4001	Mother	23	38	No
YPW3064	2	4004	4	4001	Daughter	23	41	No
YPW3064	2	4005	4	4003	Mother	38	52	No
YPW3064	2	4006	4	4003	Daughter	38	63	No
YPW3064	2	4007	4	4005	Mother	52	67	No
YPW3064	2	4008	4	4005	Daughter	52	NA	78
YPW3064	2	4009	4	4007	Mother	67	80	No
YPW3064	2	4010	4	4007	Daughter	67	NA	78
YPW3064	2	4011	4	4009	Mother	80	NA	No
YPW3064	2	4012	4	4009	Daughter	80	NA	No
YPW3064	2	4013	4	4006	Mother	63	NA	No
YPW3064	2	4014	4	4006	Daughter	63	NA	78
YPW3064	2	4015	4	4004	Mother	41	58	No
YPW3064	2	4016	4	4004	Daughter	41	66	No
YPW3064	2	4017	4	4015	Mother	58	71	No
YPW3064	2	4018	4	4015	Daughter	58	NA	No
YPW3064	2	4019	4	4017	Mother	71	NA	78
YPW3064	2	4020	4	4017	Daughter	71	NA	78
YPW3064	2	4021	4	4016	Mother	66	NA	No
YPW3064	2	4022	4	4016	Daughter	66	NA	No
YPW3064	2	4023	4	4002	Mother	26	44	No
YPW3064	2	4024	4	4002	Daughter	26	NA	41
YPW3064	2	4025	4	4023	Mother	44	66	No
YPW3064	2	4026	4	4023	Daughter	44	72	No
YPW3064	2	4027	4	4025	Mother	66	NA	76
YPW3064	2	4028	4	4025	Daughter	66	NA	76
YPW3064	2	4029	4	4026	Mother	72	NA	No
YPW3064	2	4030	4	4026	Daughter	72	NA	No
YPW3064	2	5	5	NA	NA	NA	18	No
YPW3064	2	5001	5	5	Mother	18	32	No
YPW3064	2	5002	5	5	Daughter	18	35	No
YPW3064	2	5003	5	5001	Mother	32	46	No
YPW3064	2	5004	5	5001	Daughter	32	48	No
YPW3064	2	5005	5	5003	Mother	46	59	No
YPW3064	2	5006	5	5003	Daughter	46	65	No
YPW3064	2	5007	5	5005	Mother	59	73	No
YPW3064	2	5008	5	5005	Daughter	59	78	No
YPW3064	2	5009	5	5007	Mother	73	NA	No
YPW3064	2	5010	5	5007	Daughter	73	NA	No
YPW3064	2	5011	5	5008	Mother	78	NA	No
YPW3064	2	5012	5	5008	Daughter	78	NA	No
YPW3064	2	5013	5	5006	Mother	65	77	No
YPW3064	2	5014	5	5006	Daughter	65	NA	No
YPW3064	2	5015	5	5013	Mother	77	NA	No
YPW3064	2	5016	5	5013	Daughter	77	NA	No
YPW3064	2	5017	5	5004	Mother	48	68	No
YPW3064	2	5018	5	5004	Daughter	48	75	No
YPW3064	2	5019	5	5017	Mother	68	NA	No
YPW3064	2	5020	5	5017	Daughter	68	NA	No
YPW3064	2	5021	5	5018	Mother	75	NA	No
YPW3064	2	5022	5	5018	Daughter	75	NA	No
YPW3064	2	5023	5	5002	Mother	35	63	No
YPW3064	2	5024	5	5002	Daughter	35	64	No
YPW3064	2	5025	5	5023	Mother	63	NA	No
YPW3064	2	5026	5	5023	Daughter	63	NA	No
YPW3064	2	5027	5	5024	Mother	64	NA	No
YPW3064	2	5028	5	5025	Daughter	64	NA	No
YPW3064	2	6	6	NA	NA	NA	19	No
YPW3064	2	6001	6	6	Mother	19	34	No
YPW3064	2	6002	6	6	Daughter	19	36	No
YPW3064	2	6003	6	6001	Mother	34	49	No
YPW3064	2	6004	6	6001	Daughter	34	53	No
YPW3064	2	6005	6	6003	Mother	49	66	No
YPW3064	2	6006	6	6003	Daughter	49	72	No
YPW3064	2	6007	6	6005	Mother	66	79	No
YPW3064	2	6008	6	6005	Daughter	66	NA	No
YPW3064	2	6009	6	6007	Mother	79	NA	No
YPW3064	2	6010	6	6007	Daughter	79	NA	No
YPW3064	2	6011	6	6006	Mother	72	NA	No
YPW3064	2	6012	6	6006	Daughter	72	NA	No
YPW3064	2	6013	6	6004	Mother	53	66	No
YPW3064	2	6014	6	6004	Daughter	53	79	No
YPW3064	2	6015	6	6013	Mother	66	80	No
YPW3064	2	6016	6	6013	Daughter	66	NA	No
YPW3064	2	6017	6	6015	Mother	80	NA	No
YPW3064	2	6018	6	6015	Daughter	80	NA	No
YPW3064	2	6019	6	6014	Mother	79	NA	No
YPW3064	2	6020	6	6014	Daughter	79	NA	No
YPW3064	2	6021	6	6002	Mother	36	56	No
YPW3064	2	6022	6	6002	Daughter	36	65	No
YPW3064	2	6023	6	6021	Mother	56	68	No
YPW3064	2	6024	6	6021	Daughter	56	NA	No
YPW3064	2	6025	6	6023	Mother	68	NA	No
YPW3064	2	6026	6	6023	Daughter	68	NA	No
YPW3064	2	6027	6	6022	Mother	65	NA	No
YPW3064	2	6028	6	6022	Daughter	65	NA	No
YPW3064	2	7	7	NA	NA	NA	19	No
YPW3064	2	7001	7	7	Mother	19	33	No
YPW3064	2	7002	7	7	Daughter	19	NA	34
YPW3064	2	7003	7	7001	Mother	33	48	No
YPW3064	2	7004	7	7001	Daughter	33	54	No
YPW3064	2	7005	7	7003	Mother	48	63	No
YPW3064	2	7006	7	7003	Daughter	48	66	No
YPW3064	2	7007	7	7005	Mother	63	76	No
YPW3064	2	7008	7	7005	Daughter	63	NA	No
YPW3064	2	7009	7	7007	Mother	76	NA	No
YPW3064	2	7010	7	7007	Daughter	76	NA	No
YPW3064	2	7011	7	7006	Mother	66	NA	No
YPW3064	2	7012	7	7006	Daughter	66	NA	No
YPW3064	2	7013	7	7004	Mother	54	NA	75
YPW3064	2	7014	7	7004	Daughter	54	NA	75
YPW3064	2	8	8	NA	NA	NA	26	No
YPW3064	2	8001	8	8	Mother	26	NA	No
YPW3064	2	8002	8	8	Daughter	26	NA	No
YPW3064	8	1	1	NA	NA	NA	18	No
YPW3064	8	1001	1	1	Mother	18	32	No
YPW3064	8	1002	1	1	Daughter	18	37	No
YPW3064	8	1003	1	1001	Mother	32	48	No
YPW3064	8	1004	1	1001	Daughter	32	49	No
YPW3064	8	1005	1	1003	Mother	48	61	No
YPW3064	8	1006	1	1003	Daughter	48	73	No
YPW3064	8	1007	1	1005	Mother	61	74	No
YPW3064	8	1008	1	1005	Daughter	61	NA	No
YPW3064	8	1009	1	1007	Mother	74	NA	No
YPW3064	8	1010	1	1007	Daughter	74	NA	No
YPW3064	8	1011	1	1006	Mother	73	NA	No
YPW3064	8	1012	1	1006	Daughter	73	NA	No
YPW3064	8	1013	1	1004	Mother	49	68	No
YPW3064	8	1014	1	1004	Daughter	49	78	No
YPW3064	8	1015	1	1013	Mother	68	NA	No
YPW3064	8	1016	1	1013	Daughter	68	NA	No
YPW3064	8	1017	1	1014	Mother	78	NA	No
YPW3064	8	1018	1	1014	Daughter	78	NA	No
YPW3064	8	1019	1	1002	Mother	37	51	No
YPW3064	8	1020	1	1002	Daughter	37	56	No
YPW3064	8	1021	1	1019	Mother	51	66	No
YPW3064	8	1022	1	1019	Daughter	51	NA	No
YPW3064	8	1023	1	1021	Mother	66	78	No
YPW3064	8	1024	1	1021	Daughter	66	NA	No
YPW3064	8	1025	1	1023	Mother	78	NA	No
YPW3064	8	1026	1	1023	Daughter	78	NA	No
YPW3064	8	1027	1	1020	Mother	56	72	No
YPW3064	8	1028	1	1020	Daughter	56	NA	No
YPW3064	8	1029	1	1027	Mother	72	NA	No
YPW3064	8	1030	1	1027	Daughter	72	NA	No
YPW3064	8	2	2	NA	NA	NA	14	No
YPW3064	8	2001	2	2	Mother	14	28	No
YPW3064	8	2002	2	2	Daughter	14	31	No
YPW3064	8	2003	2	2001	Mother	28	50	No
YPW3064	8	2004	2	2001	Daughter	28	49	No
YPW3064	8	2005	2	2003	Mother	50	66	No
YPW3064	8	2006	2	2003	Daughter	50	NA	No
YPW3064	8	2007	2	2005	Mother	66	NA	No
YPW3064	8	2008	2	2005	Daughter	66	NA	No
YPW3064	8	2009	2	2004	Mother	49	62	No
YPW3064	8	2010	2	2004	Daughter	49	77	No
YPW3064	8	2011	2	2009	Mother	62	78	No
YPW3064	8	2012	2	2009	Daughter	62	NA	No
YPW3064	8	2013	2	2011	Mother	78	NA	No
YPW3064	8	2014	2	2011	Daughter	78	NA	No
YPW3064	8	2015	2	2010	Mother	77	NA	No
YPW3064	8	2016	2	2010	Daughter	77	NA	No
YPW3064	8	2017	2	2002	Mother	31	54	No
YPW3064	8	2018	2	2002	Daughter	31		No
YPW3064	8	2019	2	2017	Mother	54	74	No
YPW3064	8	2020	2	2017	Daughter	54	78	No
YPW3064	8	2021	2	2019	Mother	74	NA	No
YPW3064	8	2022	2	2019	Daughter	74	NA	No
YPW3064	8	2023	2	2020	Mother	78	NA	No
YPW3064	8	2024	2	2020	Daughter	78	NA	No
YPW3064	8	3	3	NA	NA	NA	4	No
YPW3064	8	3001	3	3	Mother	4	21	No
YPW3064	8	3002	3	3	Daughter	4	22	No
YPW3064	8	3003	3	3001	Mother	21	34	No
YPW3064	8	3004	3	3001	Daughter	21	37	No
YPW3064	8	3005	3	3003	Mother	34	48	No
YPW3064	8	3006	3	3003	Daughter	34	53	No
YPW3064	8	3007	3	3005	Mother	48	61	No
YPW3064	8	3008	3	3005	Daughter	48	73	No
YPW3064	8	3009	3	3007	Mother	61	75	No
YPW3064	8	3010	3	3007	Daughter	61	NA	No
YPW3064	8	3011	3	3009	Mother	75	NA	No
YPW3064	8	3012	3	3009	Daughter	75	NA	No
YPW3064	8	3013	3	3008	Mother	73	NA	No
YPW3064	8	3014	3	3008	Daughter	73	NA	No
YPW3064	8	3015	3	3006	Mother	53	69	No
YPW3064	8	3016	3	3006	Daughter	53	NA	No
YPW3064	8	3017	3	3015	Mother	69	NA	No
YPW3064	8	3018	3	3015	Daughter	69	NA	No
YPW3064	8	3019	3	3004	Mother	37	56	No
YPW3064	8	3020	3	3004	Daughter	37	59	No
YPW3064	8	3021	3	3019	Mother	56	77	No
YPW3064	8	3022	3	3019	Daughter	56	NA	No
YPW3064	8	3023	3	3021	Mother	77	NA	No
YPW3064	8	3024	3	3021	Daughter	77	NA	No
YPW3064	8	3025	3	3020	Mother	59	76	No
YPW3064	8	3026	3	3020	Daughter	59	NA	No
YPW3064	8	3027	3	3025	Mother	76	NA	No
YPW3064	8	3028	3	3025	Daughter	76	NA	No
YPW3064	8	3029	3	3002	Mother	22	38	No
YPW3064	8	3030	3	3002	Daughter	22	NA	35
YPW3064	8	3031	3	3029	Mother	38	52	No
YPW3064	8	3032	3	3029	Daughter	38	64	No
YPW3064	8	3033	3	3031	Mother	52	NA	No
YPW3064	8	3034	3	3031	Daughter	52	NA	No
YPW3064	8	3035	3	3032	Mother	64	NA	No
YPW3064	8	3036	3	3032	Daughter	64	NA	No
YPW3064	8	4	4	NA	NA	NA	4	No
YPW3064	8	4001	4	4	Mother	4	19	No
YPW3064	8	4002	4	4	Daughter	4	21	No
YPW3064	8	4003	4	4001	Mother	19	34	No
YPW3064	8	4004	4	4001	Daughter	19	45	No
YPW3064	8	4005	4	4003	Mother	34	49	No
YPW3064	8	4006	4	4003	Daughter	34	50	No
YPW3064	8	4007	4	4005	Mother	49	65	No
YPW3064	8	4008	4	4005	Daughter	49	75	No
YPW3064	8	4009	4	4007	Mother	65	78	No
YPW3064	8	4010	4	4007	Daughter	65	NA	No
YPW3064	8	4011	4	4009	Mother	78	NA	No
YPW3064	8	4012	4	4009	Daughter	78	NA	No
YPW3064	8	4013	4	4008	Mother	75	NA	No
YPW3064	8	4014	4	4008	Daughter	75	NA	No
YPW3064	8	4015	4	4006	Mother	50	69	No
YPW3064	8	4016	4	4006	Daughter	50	NA	No
YPW3064	8	4017	4	4015	Mother	69	NA	No
YPW3064	8	4018	4	4015	Daughter	69	NA	No
YPW3064	8	4019	4	4004	Mother	45	58	No
YPW3064	8	4020	4	4004	Daughter	45	68	No
YPW3064	8	4021	4	4019	Mother	58	71	No
YPW3064	8	4022	4	4019	Daughter	58	76	No
YPW3064	8	4023	4	4021	Mother	71	NA	No
YPW3064	8	4024	4	4021	Daughter	71	NA	No
YPW3064	8	4025	4	4022	Mother	76	NA	No
YPW3064	8	4026	4	4022	Daughter	76	NA	No
YPW3064	8	4027	4	4020	Mother	68	NA	No
YPW3064	8	4028	4	4020	Daughter	68	NA	No
YPW3064	8	4029	4	4002	Mother	21	39	No
YPW3064	8	4030	4	4002	Daughter	21	50	No
YPW3064	8	4031	4	4029	Mother	39	53	No
YPW3064	8	4032	4	4029	Daughter	39	55	No
YPW3064	8	4033	4	4031	Mother	53	73	No
YPW3064	8	4034	4	4031	Daughter	53	NA	No
YPW3064	8	4035	4	4033	Mother	73	NA	No
YPW3064	8	4036	4	4033	Daughter	73	NA	No
YPW3064	8	4037	4	4032	Mother	55	NA	No
YPW3064	8	4038	4	4032	Daughter	55	NA	No
YPW3064	8	4039	4	4030	Mother	50	NA	No
YPW3064	8	4040	4	4030	Daughter	50	NA	No
YPW3064	8	5	5	NA	NA	NA	13	No
YPW3064	8	5003	5	5	Mother	13	27	No
YPW3064	8	5004	5	5	Daughter	13	28	No
YPW3064	8	5005	5	5003	Mother	27	41	No
YPW3064	8	5006	5	5003	Daughter	27	43	No
YPW3064	8	5007	5	5005	Mother	41	54	No
YPW3064	8	5008	5	5005	Daughter	41	58	No
YPW3064	8	5009	5	5007	Mother	54	69	No
YPW3064	8	5010	5	5007	Daughter	54	77	No
YPW3064	8	5011	5	5009	Mother	69	NA	No
YPW3064	8	5012	5	5009	Daughter	69	NA	No
YPW3064	8	5013	5	5010	Mother	77	NA	No
YPW3064	8	5014	5	5010	Daughter	77	NA	No
YPW3064	8	5015	5	5008	Mother	58	72	No
YPW3064	8	5016	5	5008	Daughter	58	NA	No
YPW3064	8	5017	5	5015	Mother	72	NA	No
YPW3064	8	5018	5	5015	Daughter	72	NA	No
YPW3064	8	5019	5	5006	Mother	43	58	No
YPW3064	8	5020	5	5006	Daughter	43	73	No
YPW3064	8	5021	5	5019	Mother	58	NA	No
YPW3064	8	5022	5	5019	Daughter	58	NA	No
YPW3064	8	5023	5	5020	Mother	73	NA	No
YPW3064	8	5024	5	5020	Daughter	73	NA	No
YPW3064	8	5025	5	5004	Mother	28	47	No
YPW3064	8	5026	5	5004	Daughter	28	51	No
YPW3064	8	5027	5	5025	Mother	47	61	No
YPW3064	8	5028	5	5025	Daughter	47	73	No
YPW3064	8	5029	5	5027	Mother	61	78	No
YPW3064	8	5030	5	5027	Daughter	61	NA	No
YPW3064	8	5031	5	5029	Mother	78	NA	No
YPW3064	8	5032	5	5029	Daughter	78	NA	No
YPW3064	8	5033	5	5028	Mother	73	NA	No
YPW3064	8	5034	5	5028	Daughter	73	NA	No
YPW3064	8	5035	5	5026	Mother	51	67	No
YPW3064	8	5036	5	5026	Daughter	51	74	No
YPW3064	8	5037	5	5035	Mother	67	77	No
YPW3064	8	5038	5	5035	Daughter	67	NA	No
YPW3064	8	5039	5	5037	Mother	77	NA	No
YPW3064	8	5040	5	5037	Daughter	77	NA	No
YPW3064	8	5041	5	5036	Mother	74	NA	No
YPW3064	8	5042	5	5036	Daughter	74	NA	No
YPW3064	8	6	6	NA	NA	NA	13	No
YPW3064	8	6001	6	6	Mother	13	28	No
YPW3064	8	6002	6	6	Daughter	13	33	No
YPW3064	8	6003	6	6001	Mother	28	41	No
YPW3064	8	6004	6	6001	Daughter	28	48	No
YPW3064	8	6005	6	6003	Mother	41	54	No
YPW3064	8	6006	6	6003	Daughter	41	69	No
YPW3064	8	6007	6	6005	Mother	54	70	No
YPW3064	8	6008	6	6005	Daughter	54	NA	No
YPW3064	8	6009	6	6007	Mother	70	NA	No
YPW3064	8	6010	6	6007	Daughter	70	NA	No
YPW3064	8	6011	6	6006	Mother	69	NA	No
YPW3064	8	6012	6	6006	Daughter	69	NA	No
YPW3064	8	6013	6	6004	Mother	48	65	No
YPW3064	8	6014	6	6004	Daughter	48	69	No
YPW3064	8	6015	6	6013	Mother	65	NA	No
YPW3064	8	6016	6	6013	Daughter	65	NA	No
YPW3064	8	6017	6	6014	Mother	69	NA	No
YPW3064	8	6018	6	6014	Daughter	69	NA	No
YPW3064	8	6019	6	6002	Mother	33	53	No
YPW3064	8	6020	6	6002	Daughter	33	55	No
YPW3064	8	6021	6	6019	Mother	53	74	No
YPW3064	8	6022	6	6019	Daughter	53	78	No
YPW3064	8	6023	6	6021	Mother	74	NA	No
YPW3064	8	6024	6	6021	Daughter	74	NA	No
YPW3064	8	6025	6	6022	Mother	78	NA	No
YPW3064	8	6026	6	6022	Daughter	78	NA	No
YPW3064	8	6027	6	6020	Mother	55	77	No
YPW3064	8	6028	6	6020	Daughter	55	NA	No
YPW3064	8	6029	6	6027	Mother	77	NA	No
YPW3064	8	6030	6	6027	Daughter	77	NA	No
YPW3064	8	7	7	NA	NA	NA	9	No
YPW3064	8	7001	7	7	Mother	9	25	No
YPW3064	8	7002	7	7	Daughter	9	26	No
YPW3064	8	7003	7	7001	Mother	25	40	No
YPW3064	8	7004	7	7001	Daughter	25	40	No
YPW3064	8	7005	7	7003	Mother	40	58	No
YPW3064	8	7006	7	7003	Daughter	40	62	No
YPW3064	8	7007	7	7005	Mother	58	74	No
YPW3064	8	7008	7	7005	Daughter	58	NA	No
YPW3064	8	7009	7	7007	Mother	74	NA	No
YPW3064	8	7010	7	7007	Daughter	74	NA	No
YPW3064	8	7011	7	7006	Mother	62	NA	No
YPW3064	8	7012	7	7006	Daughter	62	NA	No
YPW3064	8	7013	7	7004	Mother	40	59	No
YPW3064	8	7014	7	7004	Daughter	40	62	No
YPW3064	8	7015	7	7013	Mother	59	80	No
YPW3064	8	7016	7	7016	Daughter	59	NA	No
YPW3064	8	7017	7	7015	Mother	80	NA	No
YPW3064	8	7018	7	7015	Daughter	80	NA	No
YPW3064	8	7019	7	7014	Mother	62	NA	No
YPW3064	8	7020	7	7014	Daughter	62	NA	No
YPW3064	8	7021	7	7002	Mother	26	63	No
YPW3064	8	7022	7	7002	Daughter	26	63	No
YPW3064	8	7023	7	7021	Mother	63	NA	77
YPW3064	8	7024	7	7021	Daughter	63	NA	77
YPW3064	8	7025	7	7022	Mother	63	NA	78
YPW3064	8	7026	7	7022	Daughter	63	NA	78
YPW3064	8	8	8	NA	NA	NA	16	No
YPW3064	8	8001	8	8	Mother	16	36	No
YPW3064	8	8002	8	8	Daughter	16	37	No
YPW3064	8	8003	8	8001	Mother	36	52	No
YPW3064	8	8004	8	8001	Daughter	36	63	No
YPW3064	8	8005	8	8003	Mother	52	67	No
YPW3064	8	8006	8	8003	Daughter	52	NA	No
YPW3064	8	8007	8	8005	Mother	67	NA	No
YPW3064	8	8008	8	8005	Daughter	67	NA	No
YPW3064	8	8009	8	8004	Mother	63	74	No
YPW3064	8	8010	8	8004	Daughter	63	NA	No
YPW3064	8	8011	8	8009	Mother	74	NA	No
YPW3064	8	8012	8	8009	Daughter	74	NA	No
YPW3064	8	8013	8	8002	Mother	37	55	No
YPW3064	8	8014	8	8002	Daughter	37	56	No
YPW3064	8	8015	8	8013	Mother	55	NA	No
YPW3064	8	8016	8	8013	Daughter	55	NA	No
YPW3064	8	8017	8	8014	Mother	56	73	No
YPW3064	8	8018	8	8014	Daughter	56	NA	No
YPW3064	8	8019	8	8017	Mother	73	NA	No
YPW3064	8	8020	8	8017	Daughter	73	NA	No
YPW3064	4	1	1	NA	NA	NA	7	No
YPW3064	4	1001	1	1	Mother	7	26	No
YPW3064	4	1002	1	1	Daughter	7	30	No
YPW3064	4	1003	1	1001	Mother	27	41	No
YPW3064	4	1004	1	1001	Daughter	27	43	No
YPW3064	4	1005	1	1002	Mother	30	46	No
YPW3064	4	1006	1	1002	Daughter	30	47	No
YPW3064	4	1007	1	1003	Mother	43	63	No
YPW3064	4	1008	1	1003	Daughter	43	67	No
YPW3064	4	1009	1	1004	Mother	44	NA	No
YPW3064	4	1010	1	1004	Daughter	44	NA	No
YPW3064	4	1011	1	1005	Mother	47	64	No
YPW3064	4	1012	1	1005	Daughter	47	NA	Yes
YPW3064	4	1013	1	1006	Mother	61	NA	No
YPW3064	4	1014	1	1006	Daughter	61	NA	No
YPW3064	4	1015	1	1002	Mother	63	NA	No
YPW3064	4	1016	1	1002	Daughter	63	NA	No
YPW3064	4	1017	1	1001	Mother	64	77	No
YPW3064	4	1018	1	1001	Daughter	64	NA	No
YPW3064	4	1019	1	1008	Mother	67	NA	No
YPW3064	4	1020	1	1008	Daughter	67	NA	No
YPW3064	4	2	2	NA	NA	NA	2	No
YPW3064	4	2001	2	2	Mother	2	31	No
YPW3064	4	2002	2	2	Daughter	2	29	No
YPW3064	4	2003	2	2002	Mother	29	43	No
YPW3064	4	2004	2	2002	Daughter	29	NA	No
YPW3064	4	2005	2	2001	Mother	31	44	No
YPW3064	4	2006	2	2001	Daughter	31	54	No
YPW3064	4	2007	2	2001	Mother	43	64	No
YPW3064	4	2008	2	2001	Daughter	43	NA	No
YPW3064	4	2009	2	2006	Mother	44	56	No
YPW3064	4	2010	2	2006	Daughter	44	NA	No
YPW3064	4	2011	2	2006	Mother	56	NA	No
YPW3064	4	2012	2	2006	Daughter	56	NA	No
YPW3064	4	2013	2	2001	Mother	64	NA	No
YPW3064	4	2014	2	2001	Daughter	64	NA	No
YPW3064	4	3	3	NA	NA	NA	11	No
YPW3064	4	3001	3	3	Mother	11	25	No
YPW3064	4	3002	3	3	Daughter	11	29	No
YPW3064	4	3003	3	3001	Mother	25	41	No
YPW3064	4	3004	3	3001	Daughter	25	41	No
YPW3064	4	3005	3	3002	Mother	29	44	No
YPW3064	4	3006	3	3002	Daughter	29	52	No
YPW3064	4	3007	3	3001	Mother	41	55	No
YPW3064	4	3008	3	3001	Daughter	41	57	No
YPW3064	4	3009	3	3002	Mother	44	61	No
YPW3064	4	3010	3	3002	Daughter	44	65	No
YPW3064	4	3011	3	3004	Mother	41	62	No
YPW3064	4	3012	3	3004	Daughter	41	70	No
YPW3064	4	3013	3	3006	Mother	52	71	No
YPW3064	4	3014	3	3006	Daughter	52	75	No
YPW3064	4	3015	3	3001	Mother	55	71	No
YPW3064	4	3016	3	3001	Daughter	55	76	No
YPW3064	4	3017	3	3008	Mother	57	NA	Yes
YPW3064	4	3018	3	3008	Daughter	57	NA	Yes
YPW3064	4	3019	3	3002	Mother	61	NA	No
YPW3064	4	3020	3	3002	Daughter	61	NA	No
YPW3064	4	3021	3	3004	Mother	62	75	No
YPW3064	4	3022	3	3004	Daughter	62	NA	Yes
YPW3064	4	3023	3	3010	Mother	65	NA	No
YPW3064	4	3024	3	3010	Daughter	65	NA	No
YPW3064	4	3025	3	3012	Mother	70	NA	No
YPW3064	4	3026	3	3012	Daughter	70	NA	No
YPW3064	4	3027	3	3006	Mother	71	NA	No
YPW3064	4	3028	3	3006	Daughter	71	NA	No
YPW3064	4	3029	3	3001	Mother	71	NA	No
YPW3064	4	3030	3	3001	Daughter	71	NA	No
YPW3064	4	3031	3	3014	Mother	75	NA	No
YPW3064	4	3032	3	3014	Daughter	75	NA	No
YPW3064	4	3033	3	3016	Mother	76	NA	No
YPW3064	4	3034	3	3016	Daughter	76	NA	No
YPW3064	4	3035	3	3004	Mother	75	NA	No
YPW3064	4	3036	3	3004	Daughter	75	NA	No
YPW3064	4	4	4	NA	NA	NA	14	No
YPW3064	4	4001	4	4	Mother	14	32	No
YPW3064	4	4002	4	4	Daughter	14	35	No
YPW3064	4	4003	4	4001	Mother	32	50	No
YPW3064	4	4004	4	4001	Daughter	32	50	No
YPW3064	4	4005	4	4002	Mother	35	50	No
YPW3064	4	4006	4	4002	Daughter	35	59	No
YPW3064	4	4007	4	4001	Mother	50	75	No
YPW3064	4	4008	4	4001	Daughter	50	75	No
YPW3064	4	4009	4	4004	Mother	50	67	No
YPW3064	4	4010	4	4004	Daughter	50	NA	No
YPW3064	4	4011	4	4002	Mother	50	65	No
YPW3064	4	4012	4	4002	Daughter	50	78	No
YPW3064	4	4013	4	4006	Mother	59	75	No
YPW3064	4	4014	4	4006	Daughter	59	NA	No
YPW3064	4	4015	4	4002	Mother	65	75	No
YPW3064	4	4016	4	4002	Daughter	65	NA	No
YPW3064	4	4017	4	4004	Mother	67	79	No
YPW3064	4	4018	4	4004	Daughter	67	NA	No
YPW3064	4	4019	4	4001	Mother	75	NA	No
YPW3064	4	4020	4	4001	Daughter	75	NA	No
YPW3064	4	4021	4	4008	Mother	75	NA	No
YPW3064	4	4022	4	4008	Daughter	75	NA	No
YPW3064	4	4023	4	4006	Mother	75	NA	No
YPW3064	4	4024	4	4006	Daughter	75	NA	No
YPW3064	4	4025	4	4002	Mother	75	NA	No
YPW3064	4	4026	4	4002	Daughter	75	NA	No
YPW3064	4	4027	4	4012	Mother	78	NA	No
YPW3064	4	4028	4	4012	Daughter	78	NA	No
YPW3064	4	4029	4	4004	Mother	79	NA	No
YPW3064	4	4030	4	4004	Daughter	79	NA	No
YPW3064	4	5	5	NA	NA	NA	11	No
YPW3064	4	5001	5	5	Mother	11	28	No
YPW3064	4	5002	5	5	Daughter	11	30	No
YPW3064	4	5003	5	5001	Mother	28	42	No
YPW3064	4	5004	5	5001	Daughter	28	45	No
YPW3064	4	5005	5	5002	Mother	30	46	No
YPW3064	4	5006	5	5002	Daughter	30	53	No
YPW3064	4	5007	5	5001	Mother	42	57	No
YPW3064	4	5008	5	5001	Daughter	42	65	No
YPW3064	4	5009	5	5002	Mother	46	67	No
YPW3064	4	5010	5	5002	Daughter	46	67	No
YPW3064	4	5011	5	5006	Mother	53	74	No
YPW3064	4	5012	5	5006	Daughter	53	NA	No
YPW3064	4	5013	5	5001	Mother	57	75	No
YPW3064	4	5014	5	5001	Daughter	57	76	No
YPW3064	4	5015	5	5008	Mother	65	NA	No
YPW3064	4	5016	5	5008	Daughter	65	NA	No
YPW3064	4	5017	5	5002	Mother	67	NA	No
YPW3064	4	5018	5	5002	Daughter	67	NA	No
YPW3064	4	5019	5	5010	Mother	67	NA	No
YPW3064	4	5020	5	5010	Daughter	67	NA	No
YPW3064	4	5021	5	5004	Mother	45	65	No
YPW3064	4	5022	5	5004	Daughter	45	67	No
YPW3064	4	5023	5	5006	Mother	74	NA	No
YPW3064	4	5024	5	5006	Daughter	74	NA	No
YPW3064	4	5025	5	5001	Mother	75	NA	No
YPW3064	4	5026	5	5001	Daughter	75	NA	No
YPW3064	4	5027	5	5014	Mother	76	NA	No
YPW3064	4	5028	5	5014	Daughter	76	NA	No
YPW3064	4	5029	5	5004	Mother	65	77	No
YPW3064	4	5030	5	5004	Daughter	65	NA	No
YPW3064	4	5031	5	5022	Mother	67	NA	No
YPW3064	4	5032	5	5022	Daughter	67	NA	No
YPW3064	4	5033	5	5004	Mother	77	NA	No
YPW3064	4	5034	5	5004	Daughter	77	NA	No
YPW3064	4	6	6	NA	NA	NA	7	No
YPW3064	4	6001	6	6	Mother	7	22	No
YPW3064	4	6002	6	6	Daughter	7	21	No
YPW3064	4	6003	6	6002	Mother	21	36	No
YPW3064	4	6004	6	6002	Daughter	21	44	No
YPW3064	4	6005	6	6001	Mother	22	34	No
YPW3064	4	6006	6	6001	Daughter	22	38	No
YPW3064	4	6007	6	6002	Mother	36	51	No
YPW3064	4	6008	6	6002	Daughter	36	63	No
YPW3064	4	6009	6	6001	Mother	34	47	No
YPW3064	4	6010	6	6001	Daughter	34	59	No
YPW3064	4	6011	6	6006	Mother	38	60	No
YPW3064	4	6012	6	6006	Daughter	38	57	No
YPW3064	4	6013	6	6004	Mother	44	61	No
YPW3064	4	6014	6	6004	Daughter	44	64	No
YPW3064	4	6015	6	6001	Mother	47	61	No
YPW3064	4	6016	6	6001	Daughter	47	69	No
YPW3064	4	6017	6	6002	Mother	51	66	No
YPW3064	4	6018	6	6002	Daughter	51	NA	No
YPW3064	4	6019	6	6012	Mother	57	75	No
YPW3064	4	6020	6	6012	Daughter	57	NA	No
YPW3064	4	6021	6	6010	Mother	59	NA	No
YPW3064	4	6022	6	6010	Daughter	59	NA	No
YPW3064	4	6023	6	6006	Mother	60	NA	No
YPW3064	4	6024	6	6006	Daughter	60	NA	No
YPW3064	4	6025	6	6004	Mother	61	74	No
YPW3064	4	6026	6	6004	Daughter	61	NA	No
YPW3064	4	6027	6	6001	Mother	61	NA	No
YPW3064	4	6028	6	6001	Daughter	61	NA	No
YPW3064	4	6029	6	6008	Mother	63	77	No
YPW3064	4	6030	6	6008	Daughter	63	NA	No
YPW3064	4	6031	6	6014	Mother	64	NA	No
YPW3064	4	6032	6	6014	Daughter	64	NA	No
YPW3064	4	6033	6	6001	Mother	66	77	No
YPW3064	4	6034	6	6001	Daughter	66	NA	No
YPW3064	4	6035	6	6016	Mother	69	NA	No
YPW3064	4	6036	6	6016	Daughter	69	NA	No
YPW3064	4	6037	6	6004	Mother	74	NA	No
YPW3064	4	6038	6	6004	Daughter	74	NA	No
YPW3064	4	6039	6	6006	Mother	75	NA	No
YPW3064	4	6040	6	6006	Daughter	75	NA	No
YPW3064	4	6041	6	6008	Mother	77	NA	No
YPW3064	4	6042	6	6008	Daughter	77	NA	No
YPW3064	4	6043	6	6002	Mother	77	NA	No
YPW3064	4	6044	6	6002	Daughter	77	NA	No
YPW3064	4	7	7	NA	NA	NA	2	No
YPW3064	4	7001	7	7	Mother	2	18	No
YPW3064	4	7002	7	7	Daughter	2	22	No
YPW3064	4	7003	7	7001	Mother	18	31	No
YPW3064	4	7004	7	7001	Daughter	18	39	No
YPW3064	4	7005	7	7002	Mother	22	37	No
YPW3064	4	7006	7	7002	Daughter	22	39	No
YPW3064	4	7007	7	7001	Mother	31	42	No
YPW3064	4	7008	7	7001	Daughter	31	48	No
YPW3064	4	7009	7	7004	Mother	39	53	No
YPW3064	4	7010	7	7004	Daughter	39	76	No
YPW3064	4	7011	7	7002	Mother	37	49	No
YPW3064	4	7012	7	7002	Daughter	37	61	No
YPW3064	4	7013	7	7006	Mother	39	53	No
YPW3064	4	7014	7	7006	Daughter	39	64	No
YPW3064	4	7015	7	7001	Mother	42	55	No
YPW3064	4	7016	7	7001	Daughter	42	60	No
YPW3064	4	7017	7	7008	Mother	48	61	No
YPW3064	4	7018	7	7008	Daughter	48	76	No
YPW3064	4	7019	7	7002	Mother	49	NA	No
YPW3064	4	7020	7	7002	Daughter	49	NA	No
YPW3064	4	7021	7	7006	Mother	53	66	No
YPW3064	4	7022	7	7006	Daughter	53	NA	No
YPW3064	4	7023	7	7004	Mother	53	67	No
YPW3064	4	7024	7	7004	Daughter	53	70	No
YPW3064	4	7025	7	7001	Mother	55	70	No
YPW3064	4	7026	7	7001	Daughter	55	NA	No
YPW3064	4	7027	7	7016	Mother	60	NA	Yes
YPW3064	4	7028	7	7016	Daughter	60	NA	Yes
YPW3064	4	7029	7	7012	Mother	61	NA	No
YPW3064	4	7030	7	7012	Daughter	61	NA	No
YPW3064	4	7031	7	7008	Mother	61	NA	No
YPW3064	4	7032	7	7008	Daughter	61	NA	No
YPW3064	4	7033	7	7014	Mother	64	NA	No
YPW3064	4	7034	7	7014	Daughter	64	NA	No
YPW3064	4	7035	7	7006	Mother	66	79	No
YPW3064	4	7036	7	7006	Daughter	66	NA	No
YPW3064	4	7037	7	7004	Mother	67	77	No
YPW3064	4	7038	7	7004	Daughter	67	NA	No
YPW3064	4	7039	7	7004	Mother	70	NA	No
YPW3064	4	7040	7	7004	Daughter	70	NA	No
YPW3064	4	7041	7	7001	Mother	70	NA	No
YPW3064	4	7042	7	7001	Daughter	70	NA	No
YPW3064	4	7043	7	7018	Mother	76	NA	No
YPW3064	4	7044	7	7018	Daughter	76	NA	No
YPW3064	4	7045	7	7010	Mother	76	NA	No
YPW3064	4	7046	7	7010	Daughter	76	NA	No
YPW3064	4	7047	7	7004	Mother	77	NA	No
YPW3064	4	7048	7	7004	Daughter	77	NA	No
YPW3064	4	7049	7	7006	Mother	79	NA	No
YPW3064	4	7050	7	7006	Daughter	79	NA	No
YPW3064	4	8	8	NA	NA	NA	6	No
YPW3064	4	8001	8	8	Mother	6	24	No
YPW3064	4	8002	8	8	Daughter	6	24	No
YPW3064	4	8003	8	8001	Mother	24	39	No
YPW3064	4	8004	8	8001	Daughter	24	41	No
YPW3064	4	8005	8	8002	Mother	24	40	No
YPW3064	4	8006	8	8002	Daughter	24	54	No
YPW3064	4	8007	8	8001	Mother	39	54	No
YPW3064	4	8008	8	8001	Daughter	39	57	No
YPW3064	4	8009	8	8002	Mother	40	65	No
YPW3064	4	8010	8	8002	Daughter	40	69	No
YPW3064	4	8011	8	8004	Mother	41	56	No
YPW3064	4	8012	8	8004	Daughter	41	66	No
YPW3064	4	8013	8	8006	Mother	54	74	No
YPW3064	4	8014	8	8006	Daughter	54	75	No
YPW3064	4	8015	8	8001	Mother	54	67	No
YPW3064	4	8016	8	8001	Daughter	54	71	No
YPW3064	4	8017	8	8004	Mother	56	73	No
YPW3064	4	8018	8	8004	Daughter	56	NA	No
YPW3064	4	8019	8	8008	Mother	57	71	No
YPW3064	4	8020	8	8008	Daughter	57	NA	Yes
YPW3064	4	8021	8	8002	Mother	65	77	No
YPW3064	4	8022	8	8002	Daughter	65	NA	No
YPW3064	4	8023	8	8012	Mother	66	NA	No
YPW3064	4	8024	8	8012	Daughter	66	NA	No
YPW3064	4	8025	8	8001	Mother	67	NA	No
YPW3064	4	8026	8	8001	Daughter	67	NA	No
YPW3064	4	8027	8	8010	Mother	69	NA	No
YPW3064	4	8028	8	8010	Daughter	69	NA	No
YPW3064	4	8029	8	8016	Mother	71	NA	No
YPW3064	4	8030	8	8016	Daughter	71	NA	No
YPW3064	4	8031	8	8008	Mother	71	NA	No
YPW3064	4	8032	8	8008	Daughter	71	NA	No
YPW3064	4	8033	8	8004	Mother	73	NA	No
YPW3064	4	8034	8	8004	Daughter	73	NA	No
YPW3064	4	8035	8	8006	Mother	74	NA	No
YPW3064	4	8036	8	8006	Daughter	74	NA	No
YPW3064	4	8037	8	8014	Mother	75	NA	No
YPW3064	4	8038	8	8014	Daughter	75	NA	No
YPW3064	4	8039	8	8002	Mother	77	NA	No
YPW3064	4	8040	8	8002	Daughter	77	NA	No
YPW2879	1	1	1	NA	NA	NA	21	No
YPW2879	1	1001	1	1	Mother	21	35	No
YPW2879	1	1002	1	1	Daughter	21	44	No
YPW2879	1	1003	1	1001	Mother	35	50	No
YPW2879	1	1004	1	1001	Daughter	35	NA	No
YPW2879	1	1005	1	1003	Mother	50	NA	No
YPW2879	1	1006	1	1003	Daughter	50	68	No
YPW2879	1	1007	1	1006	Mother	68	NA	No
YPW2879	1	1008	1	1006	Daughter	68	NA	No
YPW2879	1	1009	1	1002	Mother	44	59	No
YPW2879	1	1010	1	1002	Daughter	44	64	No
YPW2879	1	1011	1	1009	Mother	59	72	No
YPW2879	1	1012	1	1009	Daughter	59	73	No
YPW2879	1	1013	1	1011	Mother	72	NA	No
YPW2879	1	1014	1	1011	Daughter	72	NA	No
YPW2879	1	1015	1	1012	Mother	73	NA	No
YPW2879	1	1016	1	1012	Daughter	73	NA	No
YPW2879	1	1017	1	1010	Mother	64	NA	No
YPW2879	1	1018	1	1010	Daughter	64	NA	No
YPW2879	1	2	2	NA	NA	NA	3	No
YPW2879	1	2001	2	2	Mother	3	19	No
YPW2879	1	2002	2	2	Daughter	3	25	No
YPW2879	1	2003	2	2001	Mother	19	34	No
YPW2879	1	2004	2	2001	Daughter	19	39	No
YPW2879	1	2005	2	2003	Mother	34	48	No
YPW2879	1	2006	2	2003	Daughter	34	49	No
YPW2879	1	2007	2	2005	Mother	48	65	No
YPW2879	1	2008	2	2005	Daughter	48	64	No
YPW2879	1	2009	2	2007	Mother	65	74	No
YPW2879	1	2010	2	2007	Daughter	65	78	No
YPW2879	1	2011	2	2009	Mother	74	NA	No
YPW2879	1	2012	2	2009	Daughter	74	NA	No
YPW2879	1	2013	2	2010	Mother	78	NA	No
YPW2879	1	2014	2	2010	Daughter	78	NA	No
YPW2879	1	2015	2	2008	Mother	64	NA	No
YPW2879	1	2016	2	2008	Daughter	64	NA	No
YPW2879	1	2017	2	2006	Mother	49	78	No
YPW2879	1	2018	2	2006	Daughter	49	72	No
YPW2879	1	2019	2	2017	Mother	78	NA	No
YPW2879	1	2020	2	2017	Daughter	78	NA	No
YPW2879	1	2021	2	2018	Mother	72	NA	No
YPW2879	1	2022	2	2018	Daughter	72	NA	No
YPW2879	1	2023	2	2004	Mother	39	56	No
YPW2879	1	2024	2	2004	Daughter	39	60	No
YPW2879	1	2025	2	2023	Mother	56	NA	No
YPW2879	1	2026	2	2023	Daughter	56	74	No
YPW2879	1	2027	2	2026	Mother	74	NA	No
YPW2879	1	2028	2	2026	Daughter	74	NA	No
YPW2879	1	2029	2	2024	Mother	60	77	No
YPW2879	1	2030	2	2024	Daughter	60	NA	No
YPW2879	1	2031	2	2029	Mother	77	NA	No
YPW2879	1	2032	2	2029	Daughter	77	NA	No
YPW2879	1	2033	2	2002	Mother	25	42	No
YPW2879	1	2034	2	2002	Daughter	25	48	No
YPW2879	1	2035	2	2033	Mother	42	55	No
YPW2879	1	2036	2	2033	Daughter	42	NA	53
YPW2879	1	2037	2	2035	Mother	55	NA	No
YPW2879	1	2038	2	2035	Daughter	55	NA	No
YPW2879	1	2039	2	2034	Mother	48	62	No
YPW2879	1	2040	2	2034	Daughter	48	73	No
YPW2879	1	2041	2	2039	Mother	62	NA	No
YPW2879	1	2042	2	2039	Daughter	62	NA	No
YPW2879	1	2043	2	2040	Mother	73	NA	No
YPW2879	1	2044	2	2040	Daughter	73	NA	No
YPW2879	1	3	3	NA	NA	NA	23	No
YPW2879	1	3001	3	3	Mother	23	41	No
YPW2879	1	3002	3	3	Daughter	23	54	No
YPW2879	1	3003	3	3001	Mother	41	61	No
YPW2879	1	3004	3	3001	Daughter	41	60	No
YPW2879	1	3005	3	3003	Mother	61	77	No
YPW2879	1	3006	3	3003	Daughter	61	NA	No
YPW2879	1	3007	3	3005	Mother	77	NA	No
YPW2879	1	3008	3	3005	Daughter	77	NA	No
YPW2879	1	3009	3	3004	Mother	60	78	No
YPW2879	1	3010	3	3004	Daughter	60	NA	No
YPW2879	1	3011	3	3009	Mother	78	NA	No
YPW2879	1	3012	3	3009	Daughter	78	NA	No
YPW2879	1	3013	3	3002	Mother	54	69	No
YPW2879	1	3014	3	3002	Daughter	54	72	No
YPW2879	1	3015	3	3013	Mother	69	NA	No
YPW2879	1	3016	3	3013	Daughter	69	NA	No
YPW2879	1	3017	3	3014	Mother	72	NA	No
YPW2879	1	3018	3	3014	Daughter	72	NA	No
YPW2879	1	4	4	NA	NA	NA	7	No
YPW2879	1	4001	4	4	Mother	7	22	No
YPW2879	1	4002	4	4	Daughter	7	33	No
YPW2879	1	4003	4	4001	Mother	22	40	No
YPW2879	1	4004	4	4001	Daughter	22	44	No
YPW2879	1	4005	4	4003	Mother	40	NA	No
YPW2879	1	4006	4	4003	Daughter	40	NA	No
YPW2879	1	4007	4	4004	Mother	44	63	No
YPW2879	1	4008	4	4004	Daughter	44	66	No
YPW2879	1	4009	4	4007	Mother	63	NA	No
YPW2879	1	4010	4	4007	Daughter	63	NA	No
YPW2879	1	4011	4	4008	Mother	66	NA	No
YPW2879	1	4012	4	4008	Daughter	66	NA	No
YPW2879	1	4013	4	4002	Mother	33	52	No
YPW2879	1	4014	4	4002	Daughter	33	60	No
YPW2879	1	4015	4	4013	Mother	52	69	No
YPW2879	1	4016	4	4013	Daughter	52	72	No
YPW2879	1	4017	4	4015	Mother	69	NA	No
YPW2879	1	4018	4	4015	Daughter	69	NA	No
YPW2879	1	4019	4	4016	Mother	72	NA	No
YPW2879	1	4020	4	4016	Daughter	72	NA	No
YPW2879	1	4021	4	4014	Mother	60	78	No
YPW2879	1	4022	4	4014	Daughter	60	NA	No
YPW2879	1	4023	4	4021	Mother	78	NA	No
YPW2879	1	4024	4	4021	Daughter	78	NA	No
YPW2879	1	5	5	NA	NA	NA	15	No
YPW2879	1	5001	5	5	Mother	15	49	No
YPW2879	1	5002	5	5	Daughter	15	49	No
YPW2879	1	5003	5	5001	Mother	49	67	No
YPW2879	1	5004	5	5001	Daughter	49	NA	No
YPW2879	1	5005	5	5003	Mother	67	NA	No
YPW2879	1	5006	5	5003	Daughter	67	NA	No
YPW2879	1	5007	5	5002	Mother	49	69	No
YPW2879	1	5008	5	5002	Daughter	49	71	No
YPW2879	1	5009	5	5007	Mother	69	NA	No
YPW2879	1	5010	5	5007	Daughter	69	NA	No
YPW2879	1	5011	5	5008	Mother	71	NA	No
YPW2879	1	5012	5	5008	Daughter	71	NA	No
YPW2879	1	6	6	NA	NA	NA	14	No
YPW2879	1	6001	6	6	Mother	14	31	No
YPW2879	1	6002	6	6	Daughter	14	35	No
YPW2879	1	6003	6	6001	Mother	31	47	No
YPW2879	1	6004	6	6001	Daughter	31	51	No
YPW2879	1	6005	6	6003	Mother	47	NA	No
YPW2879	1	6006	6	6003	Daughter	47	NA	No
YPW2879	1	6007	6	6004	Mother	51	76	No
YPW2879	1	6008	6	6004	Daughter	51	78	No
YPW2879	1	6009	6	6007	Mother	76	NA	No
YPW2879	1	6010	6	6007	Daughter	76	NA	No
YPW2879	1	6011	6	6008	Mother	78	NA	No
YPW2879	1	6012	6	6008	Daughter	78	NA	No
YPW2879	1	6013	6	6002	Mother	35	51	No
YPW2879	1	6014	6	6002	Daughter	35	58	No
YPW2879	1	6015	6	6013	Mother	51	65	No
YPW2879	1	6016	6	6013	Daughter	51	71	No
YPW2879	1	6017	6	6015	Mother	65	80	No
YPW2879	1	6018	6	6015	Daughter	65	NA	No
YPW2879	1	6019	6	6017	Mother	80	NA	No
YPW2879	1	6020	6	6017	Daughter	80	NA	No
YPW2879	1	6021	6	6016	Mother	71	NA	No
YPW2879	1	6022	6	6016	Daughter	71	NA	No
YPW2879	1	6023	6	6014	Mother	58	76	No
YPW2879	1	6024	6	6014	Daughter	58	NA	No
YPW2879	1	6025	6	6023	Mother	76	NA	No
YPW2879	1	6026	6	6023	Daughter	76	NA	No
YPW2879	1	7	7	NA	NA	NA	3	No
YPW2879	1	7001	7	7	Mother	3	20	No
YPW2879	1	7002	7	7	Daughter	3	33	No
YPW2879	1	7003	7	7001	Mother	20	44	No
YPW2879	1	7004	7	7001	Daughter	20	43	No
YPW2879	1	7005	7	7003	Mother	44	57	No
YPW2879	1	7006	7	7003	Daughter	44	67	No
YPW2879	1	7007	7	7005	Mother	57	73	No
YPW2879	1	7008	7	7005	Daughter	57	80	No
YPW2879	1	7009	7	7007	Mother	73	NA	No
YPW2879	1	7010	7	7007	Daughter	73	NA	No
YPW2879	1	7011	7	7008	Mother	80	NA	No
YPW2879	1	7012	7	7008	Daughter	80	NA	No
YPW2879	1	7013	7	7006	Mother	67	NA	No
YPW2879	1	7014	7	7006	Daughter	67	NA	No
YPW2879	1	7015	7	7004	Mother	43	59	No
YPW2879	1	7016	7	7004	Daughter	43	67	No
YPW2879	1	7017	7	7015	Mother	59	71	No
YPW2879	1	7018	7	7015	Daughter	59	80	No
YPW2879	1	7019	7	7017	Mother	71	NA	No
YPW2879	1	7020	7	7017	Daughter	71	NA	No
YPW2879	1	7021	7	7018	Mother	80	NA	No
YPW2879	1	7022	7	7018	Daughter	80	NA	No
YPW2879	1	7023	7	7016	Mother	67	NA	No
YPW2879	1	7024	7	7016	Daughter	67	NA	No
YPW2879	1	7025	7	7002	Mother	33	49	No
YPW2879	1	7026	7	7002	Daughter	33	58	No
YPW2879	1	7027	7	7025	Mother	49	73	No
YPW2879	1	7028	7	7025	Daughter	49	74	No
YPW2879	1	7029	7	7027	Mother	73	NA	No
YPW2879	1	7030	7	7027	Daughter	73	NA	No
YPW2879	1	7031	7	7028	Mother	74	NA	No
YPW2879	1	7032	7	7028	Daughter	74	NA	No
YPW2879	1	7033	7	7026	Mother	58	78	No
YPW2879	1	7034	7	7026	Daughter	58	NA	No
YPW2879	1	7035	7	7033	Mother	78	NA	No
YPW2879	1	7036	7	7033	Daughter	78	NA	No
YPW2879	1	8	8	NA	NA	NA	15	No
YPW2879	1	8001	8	8	Mother	15	31	No
YPW2879	1	8002	8	8	Daughter	15	35	No
YPW2879	1	8003	8	8001	Mother	31	46	No
YPW2879	1	8004	8	8001	Daughter	31	49	No
YPW2879	1	8005	8	8003	Mother	46	62	No
YPW2879	1	8006	8	8003	Daughter	46	71	No
YPW2879	1	8007	8	8005	Mother	62	77	No
YPW2879	1	8008	8	8005	Daughter	62	NA	No
YPW2879	1	8009	8	8007	Mother	77	NA	No
YPW2879	1	8010	8	8007	Daughter	77	NA	No
YPW2879	1	8011	8	8006	Mother	71	78	No
YPW2879	1	8012	8	8006	Daughter	71	NA	No
YPW2879	1	8013	8	8011	Mother	78	NA	No
YPW2879	1	8014	8	8011	Daughter	78	NA	No
YPW2879	1	8015	8	8004	Mother	49	NA	53
YPW2879	1	8016	8	8004	Daughter	49	NA	53
YPW2879	1	8017	8	8002	Mother	35	52	No
YPW2879	1	8018	8	8002	Daughter	35	57	No
YPW2879	1	8019	8	8017	Mother	52	66	No
YPW2879	1	8020	8	8017	Daughter	52	70	No
YPW2879	1	8021	8	8019	Mother	66	79	No
YPW2879	1	8022	8	8019	Daughter	66	NA	No
YPW2879	1	8023	8	8021	Mother	79	NA	No
YPW2879	1	8024	8	8021	Daughter	79	NA	No
YPW2879	1	8025	8	8020	Mother	70	NA	No
YPW2879	1	8026	8	8020	Daughter	70	NA	No
YPW2879	1	8027	8	8018	Mother	57	77	No
YPW2879	1	8028	8	8018	Daughter	57	80	No
YPW2879	1	8029	8	8027	Mother	77	NA	No
YPW2879	1	8030	8	8027	Daughter	77	NA	No
YPW2879	1	8031	8	8028	Mother	80	NA	No
YPW2879	1	8032	8	8028	Daughter	80	NA	No
YPW2879	2	1	1	NA	NA	NA	15	No
YPW2879	2	1001	1	1	Mother	15	32	No
YPW2879	2	1002	1	1	Daughter	15	34	No
YPW2879	2	1003	1	1001	Mother	32	51	No
YPW2879	2	1004	1	1001	Daughter	32	50	No
YPW2879	2	1005	1	1003	Mother	51	66	No
YPW2879	2	1006	1	1003	Daughter	51	70	No
YPW2879	2	1007	1	1005	Mother	66	80	No
YPW2879	2	1008	1	1005	Daughter	66	NA	No
YPW2879	2	1009	1	1007	Mother	80	NA	No
YPW2879	2	1010	1	1007	Daughter	80	NA	No
YPW2879	2	1011	1	1009	Mother	70	NA	No
YPW2879	2	1012	1	1009	Daughter	70	NA	No
YPW2879	2	1013	1	1004	Mother	50	66	No
YPW2879	2	1014	1	1004	Daughter	50	77	No
YPW2879	2	1015	1	1013	Mother	66	80	No
YPW2879	2	1016	1	1013	Daughter	66	NA	No
YPW2879	2	1017	1	1015	Mother	80	NA	No
YPW2879	2	1018	1	1015	Daughter	80	NA	No
YPW2879	2	1019	1	1014	Mother	77	NA	No
YPW2879	2	1020	1	1014	Daughter	77	NA	No
YPW2879	2	1021	1	1002	Mother	34	52	No
YPW2879	2	1022	1	1002	Daughter	34	56	No
YPW2879	2	1023	1	1021	Mother	52	68	No
YPW2879	2	1024	1	1021	Daughter	52	71	No
YPW2879	2	1025	1	1023	Mother	68	NA	No
YPW2879	2	1026	1	1023	Daughter	68	NA	No
YPW2879	2	1027	1	1024	Mother	71	NA	No
YPW2879	2	1028	1	1024	Daughter	71	NA	No
YPW2879	2	1029	1	1022	Mother	56	79	No
YPW2879	2	1030	1	1022	Daughter	56	NA	No
YPW2879	2	1031	1	1029	Mother	79	NA	No
YPW2879	2	1032	1	1029	Daughter	79	NA	No
YPW2879	2	2	2	NA	NA	NA	5	No
YPW2879	2	2001	2	2	Mother	5	23	No
YPW2879	2	2002	2	2	Daughter	5	33	No
YPW2879	2	2003	2	2001	Mother	23	39	No
YPW2879	2	2004	2	2001	Daughter	23	43	No
YPW2879	2	2005	2	2003	Mother	39	61	No
YPW2879	2	2006	2	2003	Daughter	39	60	No
YPW2879	2	2007	2	2005	Mother	61	76	No
YPW2879	2	2008	2	2005	Daughter	61	79	No
YPW2879	2	2009	2	2007	Mother	76	NA	No
YPW2879	2	2010	2	2007	Daughter	76	NA	No
YPW2879	2	2011	2	2008	Mother	79	NA	No
YPW2879	2	2012	2	2008	Daughter	79	NA	No
YPW2879	2	2013	2	2006	Mother	60	NA	No
YPW2879	2	2014	2	2006	Daughter	60	NA	No
YPW2879	2	2015	2	2004	Mother	43	66	No
YPW2879	2	2016	2	2004	Daughter	43	66	No
YPW2879	2	2017	2	2015	Mother	66	NA	No
YPW2879	2	2018	2	2015	Daughter	66	NA	No
YPW2879	2	2019	2	2016	Mother	66	NA	No
YPW2879	2	2020	2	2016	Daughter	66	NA	No
YPW2879	2	2021	2	2002	Mother	33	57	No
YPW2879	2	2022	2	2002	Daughter	33	57	No
YPW2879	2	2023	2	2021	Mother	57	74	No
YPW2879	2	2024	2	2021	Daughter	57	79	No
YPW2879	2	2025	2	2023	Mother	74	NA	No
YPW2879	2	2026	2	2023	Daughter	74	NA	No
YPW2879	2	2027	2	2024	Mother	79	NA	No
YPW2879	2	2028	2	2024	Daughter	79	NA	No
YPW2879	2	2029	2	2022	Mother	57	74	No
YPW2879	2	2030	2	2022	Daughter	57	76	No
YPW2879	2	2031	2	2029	Mother	74	NA	No
YPW2879	2	2032	2	2029	Daughter	74	NA	No
YPW2879	2	2033	2	2030	Mother	76	NA	No
YPW2879	2	2034	2	2030	Daughter	76	NA	No
YPW2879	2	3	3	NA	NA	NA	3	No
YPW2879	2	3001	3	3	Mother	2	22	No
YPW2879	2	3002	3	3	Daughter	2	22	No
YPW2879	2	3003	3	3001	Mother	22	43	No
YPW2879	2	3004	3	3001	Daughter	22	46	No
YPW2879	2	3005	3	3003	Mother	43	66	No
YPW2879	2	3006	3	3004	Daughter	43	67	No
YPW2879	2	3007	3	3005	Mother	66	NA	No
YPW2879	2	3008	3	3005	Daughter	66	NA	No
YPW2879	2	3009	3	3006	Mother	67	NA	No
YPW2879	2	3010	3	3006	Daughter	67	NA	No
YPW2879	2	3011	3	3004	Mother	46	63	No
YPW2879	2	3012	3	3004	Daughter	46	69	No
YPW2879	2	3013	3	3011	Mother	63	NA	No
YPW2879	2	3014	3	3011	Daughter	63	NA	No
YPW2879	2	3015	3	3012	Mother	69	NA	No
YPW2879	2	3016	3	3012	Daughter	69	NA	No
YPW2879	2	3017	3	3002	Mother	22	38	No
YPW2879	2	3018	3	3002	Daughter	22	45	No
YPW2879	2	3019	3	3017	Mother	38	58	No
YPW2879	2	3020	3	3017	Daughter	38	61	No
YPW2879	2	3021	3	3019	Mother	58	NA	No
YPW2879	2	3022	3	3019	Daughter	58	79	No
YPW2879	2	3023	3	3022	Mother	79	NA	No
YPW2879	2	3024	3	3022	Daughter	79	NA	No
YPW2879	2	3025	3	3020	Mother	61	NA	74
YPW2879	2	3026	3	3020	Daughter	61	NA	74
YPW2879	2	3027	3	3018	Mother	45	64	No
YPW2879	2	3028	3	3018	Daughter	45	67	No
YPW2879	2	3029	3	3027	Mother	64	80	No
YPW2879	2	3030	3	3027	Daughter	64	NA	No
YPW2879	2	3031	3	3029	Mother	80	NA	No
YPW2879	2	3032	3	3029	Daughter	80	NA	No
YPW2879	2	3033	3	3028	Mother	67	NA	No
YPW2879	2	3034	3	3028	Daughter	67	NA	No
YPW2879	2	4	4	NA	NA	NA	12	No
YPW2879	2	4001	4	4	Mother	12	25	No
YPW2879	2	4002	4	4	Daughter	12	28	No
YPW2879	2	4003	4	4001	Mother	25	41	No
YPW2879	2	4004	4	4001	Daughter	25	46	No
YPW2879	2	4005	4	4003	Mother	41	61	No
YPW2879	2	4006	4	4003	Daughter	41	59	No
YPW2879	2	4007	4	4005	Mother	61	73	No
YPW2879	2	4008	4	4005	Daughter	61	75	No
YPW2879	2	4009	4	4007	Mother	73	NA	No
YPW2879	2	4010	4	4007	Daughter	73	NA	No
YPW2879	2	4011	4	4008	Mother	75	NA	No
YPW2879	2	4012	4	4008	Daughter	75	NA	No
YPW2879	2	4013	4	4006	Mother	59	73	No
YPW2879	2	4014	4	4006	Daughter	59	74	No
YPW2879	2	4015	4	4013	Mother	73	NA	No
YPW2879	2	4016	4	4013	Daughter	73	NA	No
YPW2879	2	4017	4	4014	Mother	74	NA	No
YPW2879	2	4018	4	4014	Daughter	74	NA	No
YPW2879	2	4019	4	4004	Mother	46	68	No
YPW2879	2	4020	4	4004	Daughter	46	70	No
YPW2879	2	4021	4	4019	Mother	68	NA	No
YPW2879	2	4022	4	4019	Daughter	68	NA	No
YPW2879	2	4023	4	4020	Mother	70	NA	No
YPW2879	2	4024	4	4020	Daughter	70	NA	No
YPW2879	2	4025	4	4002	Mother	28	47	No
YPW2879	2	4026	4	4002	Daughter	28	51	No
YPW2879	2	4027	4	4025	Mother	47	62	No
YPW2879	2	4028	4	4025	Daughter	47	68	No
YPW2879	2	4029	4	4027	Mother	62	NA	No
YPW2879	2	4030	4	4027	Daughter	62	NA	No
YPW2879	2	4031	4	4028	Mother	68	NA	No
YPW2879	2	4032	4	4028	Daughter	68	NA	No
YPW2879	2	4033	4	4026	Mother	51	66	No
YPW2879	2	4034	4	4026	Daughter	51	NA	No
YPW2879	2	4035	4	4033	Mother	66	NA	No
YPW2879	2	4036	4	4033	Daughter	66	NA	No
YPW2879	2	5	5	NA	NA	NA	13	No
YPW2879	2	5001	5	5	Mother	13	27	No
YPW2879	2	5002	5	5	Daughter	13	30	No
YPW2879	2	5003	5	5001	Mother	27	43	No
YPW2879	2	5004	5	5001	Daughter	27	44	No
YPW2879	2	5005	5	5003	Mother	43	58	No
YPW2879	2	5006	5	5003	Daughter	43	64	No
YPW2879	2	5007	5	5005	Mother	58	73	No
YPW2879	2	5008	5	5005	Daughter	58	78	No
YPW2879	2	5009	5	5007	Mother	73	NA	No
YPW2879	2	5010	5	5007	Daughter	73	NA	No
YPW2879	2	5011	5	5008	Mother	78	NA	No
YPW2879	2	5012	5	5008	Daughter	78	NA	No
YPW2879	2	5013	5	5006	Mother	64	80	No
YPW2879	2	5014	5	5006	Daughter	64	NA	No
YPW2879	2	5015	5	5013	Mother	80	NA	No
YPW2879	2	5016	5	5013	Daughter	80	NA	No
YPW2879	2	5017	5	5004	Mother	44	62	No
YPW2879	2	5018	5	5004	Daughter	44	67	No
YPW2879	2	5019	5	5017	Mother	62	78	No
YPW2879	2	5020	5	5017	Daughter	62	NA	No
YPW2879	2	5021	5	5019	Mother	78	NA	No
YPW2879	2	5022	5	5019	Daughter	78	NA	No
YPW2879	2	5023	5	5018	Mother	67	NA	No
YPW2879	2	5024	5	5018	Daughter	67	NA	No
YPW2879	2	5025	5	5002	Mother	30	51	No
YPW2879	2	5026	5	5002	Daughter	30	53	No
YPW2879	2	5027	5	5025	Mother	51	67	No
YPW2879	2	5028	5	5025	Daughter	51	68	No
YPW2879	2	5029	5	5027	Mother	67	NA	No
YPW2879	2	5030	5	5027	Daughter	67	NA	No
YPW2879	2	5031	5	5028	Mother	68	NA	No
YPW2879	2	5032	5	5028	Daughter	68	NA	No
YPW2879	2	5033	5	5026	Mother	53	71	No
YPW2879	2	5034	5	5026	Daughter	53	73	No
YPW2879	2	5035	5	5033	Mother	71	NA	No
YPW2879	2	5036	5	5033	Daughter	71	NA	No
YPW2879	2	5037	5	5034	Mother	73	NA	No
YPW2879	2	5038	5	5034	Daughter	73	NA	No
YPW2879	2	6	6	NA	NA	NA	13	No
YPW2879	2	6001	6	6	Mother	13	27	No
YPW2879	2	6002	6	6	Daughter	13	29	No
YPW2879	2	6003	6	6001	Mother	27	42	No
YPW2879	2	6004	6	6001	Daughter	27	47	No
YPW2879	2	6005	6	6003	Mother	42	61	No
YPW2879	2	6006	6	6003	Daughter	42	61	No
YPW2879	2	6007	6	6005	Mother	61	74	No
YPW2879	2	6008	6	6005	Daughter	61	NA	No
YPW2879	2	6009	6	6007	Mother	74	NA	No
YPW2879	2	6010	6	6007	Daughter	74	NA	No
YPW2879	2	6011	6	6006	Mother	61	77	No
YPW2879	2	6012	6	6006	Daughter	61	NA	No
YPW2879	2	6013	6	6011	Mother	77	NA	No
YPW2879	2	6014	6	6011	Daughter	77	NA	No
YPW2879	2	6015	6	6004	Mother	47	69	No
YPW2879	2	6016	6	6004	Daughter	47	73	No
YPW2879	2	6017	6	6015	Mother	69	NA	No
YPW2879	2	6018	6	6015	Daughter	69	NA	No
YPW2879	2	6019	6	6016	Mother	73	NA	No
YPW2879	2	6020	6	6016	Daughter	73	NA	No
YPW2879	2	6021	6	6002	Mother	29	40	No
YPW2879	2	6022	6	6002	Daughter	29	NA	No
YPW2879	2	6023	6	6021	Mother	40	NA	No
YPW2879	2	6024	6	6021	Daughter	40	60	No
YPW2879	2	6025	6	6024	Mother	60	79	No
YPW2879	2	6026	6	6024	Daughter	60	NA	No
YPW2879	2	6027	6	6025	Mother	79	NA	No
YPW2879	2	6028	6	6025	Daughter	79	NA	No
YPW2879	2	7	7	NA	NA	NA	21	No
YPW2879	2	7001	7	7	Mother	21	38	No
YPW2879	2	7002	7	7	Daughter	21	46	No
YPW2879	2	7003	7	7001	Mother	38	57	No
YPW2879	2	7004	7	7001	Daughter	38	57	No
YPW2879	2	7005	7	7003	Mother	57	71	No
YPW2879	2	7006	7	7003	Daughter	57	NA	No
YPW2879	2	7007	7	7005	Mother	71	NA	No
YPW2879	2	7008	7	7005	Daughter	71	NA	No
YPW2879	2	7009	7	7004	Mother	57	73	No
YPW2879	2	7010	7	7004	Daughter	57	77	No
YPW2879	2	7011	7	7009	Mother	73	NA	No
YPW2879	2	7012	7	7009	Daughter	73	NA	No
YPW2879	2	7013	7	7011	Mother	77	NA	No
YPW2879	2	7014	7	7011	Daughter	77	NA	No
YPW2879	2	7015	7	7002	Mother	46	63	No
YPW2879	2	7016	7	7002	Daughter	46	68	No
YPW2879	2	7017	7	7015	Mother	63	NA	No
YPW2879	2	7018	7	7015	Daughter	63	NA	No
YPW2879	2	7019	7	7016	Mother	68	NA	No
YPW2879	2	7020	7	7016	Daughter	68	NA	No
YPW2879	2	8	8	NA	NA	NA	13	No
YPW2879	2	8001	8	8	Mother	13	30	No
YPW2879	2	8002	8	8	Daughter	13	34	No
YPW2879	2	8003	8	8001	Mother	30	46	No
YPW2879	2	8004	8	8001	Daughter	30	NA	46
YPW2879	2	8005	8	8003	Mother	46	63	No
YPW2879	2	8006	8	8003	Daughter	46	65	No
YPW2879	2	8007	8	8005	Mother	63	78	No
YPW2879	2	8008	8	8005	Daughter	63	NA	No
YPW2879	2	8009	8	8007	Mother	78	NA	No
YPW2879	2	8010	8	8007	Daughter	78	NA	No
YPW2879	2	8011	8	8006	Mother	65	NA	No
YPW2879	2	8012	8	8006	Daughter	65	NA	No
YPW2879	2	8013	8	8002	Mother	34	51	No
YPW2879	2	8014	8	8002	Daughter	34	55	No
YPW2879	2	8015	8	8013	Mother	51	68	No
YPW2879	2	8016	8	8013	Daughter	51	75	No
YPW2879	2	8017	8	8015	Mother	68	NA	No
YPW2879	2	8018	8	8015	Daughter	68	NA	No
YPW2879	2	8019	8	8016	Mother	75	NA	No
YPW2879	2	8020	8	8016	Daughter	75	NA	No
YPW2879	2	8021	8	8014	Mother	55	72	No
YPW2879	2	8022	8	8014	Daughter	55	75	No
YPW2879	2	8023	8	8021	Mother	72	NA	No
YPW2879	2	8024	8	8021	Daughter	72	NA	No
YPW2879	2	8025	8	8022	Mother	75	NA	No
YPW2879	2	8026	8	8022	Daughter	75	NA	No
YPW2879	3	1	1	NA	NA	NA	18	No
YPW2879	3	1001	1	1	Mother	18	36	No
YPW2879	3	1002	1	1	Daughter	18	41	No
YPW2879	3	1003	1	1001	Mother	36	55	No
YPW2879	3	1004	1	1001	Daughter	36	57	No
YPW2879	3	1005	1	1003	Mother	55	75	No
YPW2879	3	1006	1	1003	Daughter	55	77	No
YPW2879	3	1007	1	1005	Mother	75	NA	No
YPW2879	3	1008	1	1005	Daughter	75	NA	No
YPW2879	3	1009	1	1006	Mother	77	NA	No
YPW2879	3	1010	1	1006	Daughter	77	NA	No
YPW2879	3	1011	1	1004	Mother	57	NA	No
YPW2879	3	1012	1	1004	Daughter	57	NA	No
YPW2879	3	1013	1	1002	Mother	41	56	No
YPW2879	3	1014	1	1002	Daughter	41	61	No
YPW2879	3	1015	1	1013	Mother	56	72	No
YPW2879	3	1016	1	1013	Daughter	56	74	No
YPW2879	3	1017	1	1015	Mother	72	NA	No
YPW2879	3	1018	1	1015	Daughter	72	NA	No
YPW2879	3	1019	1	1016	Mother	74	NA	No
YPW2879	3	1020	1	1016	Daughter	74	NA	No
YPW2879	3	1021	1	1014	Mother	61	75	No
YPW2879	3	1022	1	1014	Daughter	61	NA	No
YPW2879	3	1023	1	1021	Mother	75	NA	No
YPW2879	3	1024	1	1021	Daughter	75	NA	No
YPW2879	3	2	2	NA	NA	NA	12	No
YPW2879	3	2001	2	2	Mother	12	31	No
YPW2879	3	2002	2	2	Daughter	12	33	No
YPW2879	3	2003	2	2001	Mother	31	49	No
YPW2879	3	2004	2	2001	Daughter	31	54	No
YPW2879	3	2005	2	2003	Mother	49	70	No
YPW2879	3	2006	2	2003	Daughter	49	72	No
YPW2879	3	2007	2	2005	Mother	70	NA	No
YPW2879	3	2008	2	2005	Daughter	70	NA	No
YPW2879	3	2009	2	2006	Mother	72	NA	No
YPW2879	3	2010	2	2006	Daughter	72	NA	No
YPW2879	3	2011	2	2004	Mother	54	73	No
YPW2879	3	2012	2	2004	Daughter	54	75	No
YPW2879	3	2013	2	2011	Mother	73	NA	No
YPW2879	3	2014	2	2011	Daughter	73	NA	No
YPW2879	3	2015	2	2012	Mother	75	NA	No
YPW2879	3	2016	2	2012	Daughter	75	NA	No
YPW2879	3	2017	2	2002	Mother	33	51	No
YPW2879	3	2018	2	2002	Daughter	33	55	No
YPW2879	3	2019	2	2017	Mother	51	69	No
YPW2879	3	2020	2	2017	Daughter	51	75	No
YPW2879	3	2021	2	2019	Mother	69	NA	No
YPW2879	3	2022	2	2019	Daughter	69	NA	No
YPW2879	3	2023	2	2020	Mother	75	NA	No
YPW2879	3	2024	2	2020	Daughter	75	NA	No
YPW2879	3	2025	2	2018	Mother	55	NA	No
YPW2879	3	2026	2	2018	Daughter	55	NA	No
YPW2879	3	3	3	NA	NA	NA	17	No
YPW2879	3	3001	3	3	Mother	17	34	No
YPW2879	3	3002	3	3	Daughter	17	35	No
YPW2879	3	3003	3	3001	Mother	34	55	No
YPW2879	3	3004	3	3001	Daughter	34	54	No
YPW2879	3	3005	3	3003	Mother	55	71	No
YPW2879	3	3006	3	3003	Daughter	55	73	No
YPW2879	3	3007	3	3005	Mother	71	NA	No
YPW2879	3	3008	3	3005	Daughter	71	NA	No
YPW2879	3	3009	3	3006	Mother	73	NA	No
YPW2879	3	3010	3	3006	Daughter	73	NA	No
YPW2879	3	3011	3	3004	Mother	54	75	No
YPW2879	3	3012	3	3004	Daughter	54	79	No
YPW2879	3	3013	3	3011	Mother	75	NA	No
YPW2879	3	3014	3	3011	Daughter	75	NA	No
YPW2879	3	3015	3	3012	Mother	79	NA	No
YPW2879	3	3016	3	3012	Daughter	79	NA	No
YPW2879	3	3017	3	3002	Mother	35	56	No
YPW2879	3	3018	3	3002	Daughter	35	59	No
YPW2879	3	3019	3	3017	Mother	56	74	No
YPW2879	3	3020	3	3017	Daughter	56	74	No
YPW2879	3	3021	3	3019	Mother	74	NA	No
YPW2879	3	3022	3	3019	Daughter	74	NA	No
YPW2879	3	3023	3	3020	Mother	74	NA	No
YPW2879	3	3024	3	3020	Daughter	74	NA	No
YPW2879	3	3025	3	3018	Mother	59	75	No
YPW2879	3	3026	3	3018	Daughter	59	78	No
YPW2879	3	3027	3	3025	Mother	75	NA	No
YPW2879	3	3028	3	3025	Daughter	75	NA	No
YPW2879	3	3029	3	3026	Mother	78	NA	No
YPW2879	3	3030	3	3026	Daughter	78	NA	No
YPW2879	3	4	4	NA	NA	NA	5	No
YPW2879	3	4001	4	4	Mother	5	26	No
YPW2879	3	4002	4	4	Daughter	5	31	No
YPW2879	3	4003	4	4001	Mother	26	45	No
YPW2879	3	4004	4	4001	Daughter	26	49	No
YPW2879	3	4005	4	4003	Mother	45	63	No
YPW2879	3	4006	4	4003	Daughter	45	72	No
YPW2879	3	4007	4	4005	Mother	63	79	No
YPW2879	3	4008	4	4005	Daughter	63	NA	No
YPW2879	3	4009	4	4007	Mother	79	NA	No
YPW2879	3	4010	4	4007	Daughter	79	NA	No
YPW2879	3	4011	4	4006	Mother	72	NA	No
YPW2879	3	4012	4	4006	Daughter	72	NA	No
YPW2879	3	4013	4	4004	Mother	49	66	No
YPW2879	3	4014	4	4004	Daughter	49	71	No
YPW2879	3	4015	4	4013	Mother	66	NA	No
YPW2879	3	4016	4	4013	Daughter	66	NA	No
YPW2879	3	4017	4	4014	Mother	71	NA	No
YPW2879	3	4018	4	4014	Daughter	71	NA	No
YPW2879	3	4019	4	4002	Mother	31	52	No
YPW2879	3	4020	4	4002	Daughter	31	68	No
YPW2879	3	4021	4	4019	Mother	52	71	No
YPW2879	3	4022	4	4019	Daughter	52	73	No
YPW2879	3	4023	4	4021	Mother	71	NA	No
YPW2879	3	4024	4	4021	Daughter	71	NA	No
YPW2879	3	4025	4	4022	Mother	73	NA	No
YPW2879	3	4026	4	4022	Daughter	73	NA	No
YPW2879	3	4027	4	4020	Mother	68	NA	No
YPW2879	3	4028	4	4020	Daughter	68	NA	No
YPW2879	3	5	5	NA	NA	NA	21	No
YPW2879	3	5001	5	5	Mother	21	49	No
YPW2879	3	5002	5	5	Daughter	21	NA	No
YPW2879	3	5003	5	5001	Mother	49	NA	No
YPW2879	3	5004	5	5001	Daughter	49	NA	No
YPW2879	3	6	6	NA	NA	NA	20	No
YPW2879	3	6001	6	6	Mother	20	37	No
YPW2879	3	6002	6	6	Daughter	20	40	No
YPW2879	3	6003	6	6001	Mother	37	55	No
YPW2879	3	6004	6	6001	Daughter	37	57	No
YPW2879	3	6005	6	6003	Mother	55	74	No
YPW2879	3	6006	6	6003	Daughter	55	NA	No
YPW2879	3	6007	6	6005	Mother	74	NA	No
YPW2879	3	6008	6	6005	Daughter	74	NA	No
YPW2879	3	6009	6	6004	Mother	57	NA	No
YPW2879	3	6010	6	6004	Daughter	57	NA	No
YPW2879	3	6011	6	6002	Mother	40	57	No
YPW2879	3	6012	6	6002	Daughter	40	67	No
YPW2879	3	6013	6	6011	Mother	57	73	No
YPW2879	3	6014	6	6011	Daughter	57	NA	No
YPW2879	3	6015	6	6013	Mother	73	NA	No
YPW2879	3	6016	6	6013	Daughter	73	NA	No
YPW2879	3	6017	6	6012	Mother	67	NA	No
YPW2879	3	6018	6	6012	Daughter	67	NA	No
YPW2879	3	7	7	NA	NA	NA	2	No
YPW2879	3	7001	7	7	Mother	2	19	No
YPW2879	3	7002	7	7	Daughter	2	27	No
YPW2879	3	7003	7	7001	Mother	19	35	No
YPW2879	3	7004	7	7001	Daughter	19	36	No
YPW2879	3	7005	7	7003	Mother	35	54	No
YPW2879	3	7006	7	7003	Daughter	35	53	No
YPW2879	3	7007	7	7005	Mother	54	NA	No
YPW2879	3	7008	7	7005	Daughter	54	NA	No
YPW2879	3	7009	7	7006	Mother	53	70	No
YPW2879	3	7010	7	7006	Daughter	53	72	No
YPW2879	3	7011	7	7009	Mother	70	NA	No
YPW2879	3	7012	7	7009	Daughter	70	NA	No
YPW2879	3	7013	7	7010	Mother	72	NA	No
YPW2879	3	7014	7	7010	Daughter	72	NA	No
YPW2879	3	7015	7	7004	Mother	36	52	No
YPW2879	3	7016	7	7004	Daughter	36	59	No
YPW2879	3	7017	7	7015	Mother	52	66	No
YPW2879	3	7018	7	7015	Daughter	52	71	No
YPW2879	3	7019	7	7017	Mother	66	NA	No
YPW2879	3	7020	7	7017	Daughter	66	NA	No
YPW2879	3	7021	7	7018	Mother	71	NA	No
YPW2879	3	7022	7	7018	Daughter	71	NA	No
YPW2879	3	7023	7	7016	Mother	59	NA	No
YPW2879	3	7024	7	7016	Daughter	59	NA	No
YPW2879	3	7025	7	7002	Mother	27	45	No
YPW2879	3	7026	7	7002	Daughter	27	49	No
YPW2879	3	7027	7	7025	Mother	45	64	No
YPW2879	3	7028	7	7025	Daughter	45	67	No
YPW2879	3	7029	7	7027	Mother	64	NA	No
YPW2879	3	7030	7	7027	Daughter	64	NA	No
YPW2879	3	7031	7	7028	Mother	67	NA	No
YPW2879	3	7032	7	7028	Daughter	67	NA	No
YPW2879	3	7033	7	7026	Mother	49	NA	63
YPW2879	3	7034	7	7026	Daughter	49	NA	63
YPW2879	3	8	8	NA	NA	NA	15	No
YPW2879	3	8001	8	8	Mother	15	37	No
YPW2879	3	8002	8	8	Daughter	15	36	No
YPW2879	3	8003	8	8001	Mother	37	66	No
YPW2879	3	8004	8	8001	Daughter	37	64	No
YPW2879	3	8005	8	8003	Mother	66	NA	No
YPW2879	3	8006	8	8003	Daughter	66	NA	No
YPW2879	3	8007	8	8004	Mother	64	78	No
YPW2879	3	8008	8	8004	Daughter	64	NA	No
YPW2879	3	8009	8	8007	Mother	78	NA	No
YPW2879	3	8010	8	8007	Daughter	78	NA	No
YPW2879	3	8011	8	8002	Mother	36	53	No
YPW2879	3	8012	8	8002	Daughter	36	66	No
YPW2879	3	8013	8	8011	Mother	53	68	No
YPW2879	3	8014	8	8011	Daughter	53	NA	67
YPW2879	3	8015	8	8013	Mother	68	NA	No
YPW2879	3	8016	8	8013	Daughter	68	NA	No
YPW2879	3	8017	8	8012	Mother	66	NA	No
YPW2879	3	8018	8	8012	Daughter	66	NA	No
YPW2879	4	1	1	NA	NA	NA	22	No
YPW2879	4	1001	1	1	Mother	22	39	No
YPW2879	4	1002	1	1	Daughter	22	42	No
YPW2879	4	1003	1	1001	Mother	39	55	No
YPW2879	4	1004	1	1001	Daughter	39	58	No
YPW2879	4	1005	1	1003	Mother	55	71	No
YPW2879	4	1006	1	1003	Daughter	55	74	No
YPW2879	4	1007	1	1005	Mother	71	NA	No
YPW2879	4	1008	1	1005	Daughter	71	NA	No
YPW2879	4	1009	1	1006	Mother	74	NA	No
YPW2879	4	1010	1	1006	Daughter	74	NA	No
YPW2879	4	1011	1	1004	Mother	58	78	No
YPW2879	4	1012	1	1004	Daughter	58	NA	No
YPW2879	4	1013	1	1011	Mother	78	NA	No
YPW2879	4	1014	1	1011	Daughter	78	NA	No
YPW2879	4	1015	1	1002	Mother	42	59	No
YPW2879	4	1016	1	1002	Daughter	42	61	No
YPW2879	4	1017	1	1015	Mother	59	73	No
YPW2879	4	1018	1	1015	Daughter	59	NA	72
YPW2879	4	1019	1	1017	Mother	73	NA	No
YPW2879	4	1020	1	1017	Daughter	73	NA	No
YPW2879	4	1021	1	1016	Mother	61	77	No
YPW2879	4	1022	1	1016	Daughter	61	NA	No
YPW2879	4	1023	1	1021	Mother	77	NA	No
YPW2879	4	1024	1	1021	Daughter	77	NA	No
YPW2879	4	2	2	NA	NA	NA	15	No
YPW2879	4	2001	2	2	Mother	15	32	No
YPW2879	4	2002	2	2	Daughter	15	34	No
YPW2879	4	2003	2	2001	Mother	32	50	No
YPW2879	4	2004	2	2001	Daughter	32	53	No
YPW2879	4	2005	2	2003	Mother	50	65	No
YPW2879	4	2006	2	2003	Daughter	50	66	No
YPW2879	4	2007	2	2005	Mother	65	NA	No
YPW2879	4	2008	2	2005	Daughter	65	NA	No
YPW2879	4	2009	2	2006	Mother	66	NA	No
YPW2879	4	2010	2	2006	Daughter	66	NA	No
YPW2879	4	2011	2	2004	Mother	53	77	No
YPW2879	4	2012	2	2004	Daughter	53	NA	No
YPW2879	4	2013	2	2011	Mother	77	NA	No
YPW2879	4	2014	2	2011	Daughter	77	NA	No
YPW2879	4	2015	2	2002	Mother	34	52	No
YPW2879	4	2016	2	2002	Daughter	34	53	No
YPW2879	4	2017	2	2015	Mother	52	69	No
YPW2879	4	2018	2	2015	Daughter	52	77	No
YPW2879	4	2019	2	2017	Mother	69	NA	No
YPW2879	4	2020	2	2017	Daughter	69	NA	No
YPW2879	4	2021	2	2018	Mother	77	NA	No
YPW2879	4	2022	2	2018	Daughter	77	NA	No
YPW2879	4	2023	2	2016	Mother	53	67	No
YPW2879	4	2024	2	2016	Daughter	53	76	No
YPW2879	4	2025	2	2023	Mother	67	NA	No
YPW2879	4	2026	2	2023	Daughter	67	NA	No
YPW2879	4	2027	2	2024	Mother	76	NA	No
YPW2879	4	2028	2	2024	Daughter	76	NA	No
YPW2879	4	3	3	NA	NA	NA	12	No
YPW2879	4	3001	3	3	Mother	12	26	No
YPW2879	4	3002	3	3	Daughter	12	30	No
YPW2879	4	3003	3	3001	Mother	26	41	No
YPW2879	4	3004	3	3001	Daughter	26	43	No
YPW2879	4	3005	3	3003	Mother	41	62	No
YPW2879	4	3006	3	3003	Daughter	41	62	No
YPW2879	4	3007	3	3005	Mother	62	76	No
YPW2879	4	3008	3	3005	Daughter	62	76	No
YPW2879	4	3009	3	3007	Mother	76	NA	No
YPW2879	4	3010	3	3007	Daughter	76	NA	No
YPW2879	4	3011	3	3008	Mother	76	NA	No
YPW2879	4	3012	3	3008	Daughter	76	NA	No
YPW2879	4	3013	3	3006	Mother	62	75	No
YPW2879	4	3014	3	3006	Daughter	62	77	No
YPW2879	4	3015	3	3013	Mother	75	NA	No
YPW2879	4	3016	3	3013	Daughter	75	NA	No
YPW2879	4	3017	3	3014	Mother	77	NA	No
YPW2879	4	3018	3	3014	Daughter	77	NA	No
YPW2879	4	3019	3	3004	Mother	43	59	No
YPW2879	4	3020	3	3004	Daughter	43	64	No
YPW2879	4	3021	3	3019	Mother	59	78	No
YPW2879	4	3022	3	3019	Daughter	59	NA	No
YPW2879	4	3023	3	3021	Mother	78	NA	No
YPW2879	4	3024	3	3021	Daughter	78	NA	No
YPW2879	4	3025	3	3020	Mother	64	80	No
YPW2879	4	3026	3	3020	Daughter	64	NA	No
YPW2879	4	3027	3	3025	Mother	80	NA	No
YPW2879	4	3028	3	3025	Daughter	80	NA	No
YPW2879	4	3029	3	3002	Mother	30	48	No
YPW2879	4	3030	3	3002	Daughter	30	61	No
YPW2879	4	3031	3	3029	Mother	48	64	No
YPW2879	4	3032	3	3029	Daughter	48	68	No
YPW2879	4	3033	3	3031	Mother	64	80	No
YPW2879	4	3034	3	3031	Daughter	64	NA	No
YPW2879	4	3035	3	3033	Mother	80	NA	No
YPW2879	4	3036	3	3033	Daughter	80	NA	No
YPW2879	4	3037	3	3032	Mother	68	NA	No
YPW2879	4	3038	3	3032	Daughter	68	NA	No
YPW2879	4	3039	3	3030	Mother	61	79	No
YPW2879	4	3040	3	3030	Daughter	61	NA	No
YPW2879	4	3041	3	3039	Mother	79	NA	No
YPW2879	4	3042	3	3039	Daughter	79	NA	No
YPW2879	4	4	4	NA	NA	NA	15	No
YPW2879	4	4001	4	4	Mother	15	35	No
YPW2879	4	4002	4	4	Daughter	15	40	No
YPW2879	4	4003	4	4001	Mother	35	54	No
YPW2879	4	4004	4	4001	Daughter	35	57	No
YPW2879	4	4005	4	4003	Mother	54	72	No
YPW2879	4	4006	4	4003	Daughter	54	74	No
YPW2879	4	4007	4	4005	Mother	72	NA	No
YPW2879	4	4008	4	4005	Daughter	72	NA	No
YPW2879	4	4009	4	4006	Mother	74	NA	No
YPW2879	4	4010	4	4006	Daughter	74	NA	No
YPW2879	4	4011	4	4004	Mother	57	75	No
YPW2879	4	4012	4	4004	Daughter	57	76	No
YPW2879	4	4013	4	4011	Mother	75	NA	No
YPW2879	4	4014	4	4011	Daughter	75	NA	No
YPW2879	4	4015	4	4012	Mother	76	NA	No
YPW2879	4	4016	4	4012	Daughter	76	NA	No
YPW2879	4	4017	4	4002	Mother	40	60	No
YPW2879	4	4018	4	4002	Daughter	40	61	No
YPW2879	4	4019	4	4017	Mother	60	77	No
YPW2879	4	4020	4	4017	Daughter	60	80	No
YPW2879	4	4021	4	4019	Mother	77	NA	No
YPW2879	4	4022	4	4019	Daughter	77	NA	No
YPW2879	4	4023	4	4020	Mother	80	NA	No
YPW2879	4	4024	4	4020	Daughter	80	NA	No
YPW2879	4	4025	4	4018	Mother	61	76	No
YPW2879	4	4026	4	4018	Daughter	61	79	No
YPW2879	4	4027	4	4025	Mother	76	NA	No
YPW2879	4	4028	4	4025	Daughter	76	NA	No
YPW2879	4	4029	4	4026	Mother	79	NA	No
YPW2879	4	4030	4	4026	Daughter	79	NA	No
YPW2879	4	5	5	NA	NA	NA	19	No
YPW2879	4	5001	5	5	Mother	19	35	No
YPW2879	4	5002	5	5	Daughter	19	38	No
YPW2879	4	5003	5	5001	Mother	35	NA	No
YPW2879	4	5004	5	5001	Daughter	35	80	No
YPW2879	4	5005	5	5004	Mother	80	NA	No
YPW2879	4	5006	5	5004	Daughter	80	NA	No
YPW2879	4	5007	5	5002	Mother	38	NA	No
YPW2879	4	5008	5	5002	Daughter	38	NA	No
YPW2879	4	6	6	NA	NA	NA	13	No
YPW2879	4	6001	6	6	Mother	13	31	No
YPW2879	4	6002	6	6	Daughter	13	41	No
YPW2879	4	6003	6	6001	Mother	31	48	No
YPW2879	4	6004	6	6001	Daughter	31	49	No
YPW2879	4	6005	6	6003	Mother	48	66	No
YPW2879	4	6006	6	6003	Daughter	48	75	No
YPW2879	4	6007	6	6005	Mother	66	NA	No
YPW2879	4	6008	6	6005	Daughter	66	NA	No
YPW2879	4	6009	6	6006	Mother	75	NA	No
YPW2879	4	6010	6	6006	Daughter	75	NA	No
YPW2879	4	6011	6	6004	Mother	49	69	No
YPW2879	4	6012	6	6004	Daughter	49	73	No
YPW2879	4	6013	6	6011	Mother	69	NA	No
YPW2879	4	6014	6	6011	Daughter	69	NA	No
YPW2879	4	6015	6	6012	Mother	73	NA	No
YPW2879	4	6016	6	6012	Daughter	73	NA	No
YPW2879	4	6017	6	6002	Mother	41	58	No
YPW2879	4	6018	6	6002	Daughter	41	60	No
YPW2879	4	6019	6	6017	Mother	58	72	No
YPW2879	4	6020	6	6017	Daughter	58	74	No
YPW2879	4	6021	6	6019	Mother	72	NA	No
YPW2879	4	6022	6	6019	Daughter	72	NA	No
YPW2879	4	6023	6	6020	Mother	74	NA	No
YPW2879	4	6024	6	6020	Daughter	74	NA	No
YPW2879	4	6025	6	6018	Mother	60	NA	No
YPW2879	4	6026	6	6018	Daughter	60	NA	No
YPW2879	4	7	7	NA	NA	NA	18	No
YPW2879	4	7001	7	7	Mother	18	34	No
YPW2879	4	7002	7	7	Daughter	18	36	No
YPW2879	4	7003	7	7001	Mother	34	50	No
YPW2879	4	7004	7	7001	Daughter	34	55	No
YPW2879	4	7005	7	7003	Mother	50	66	No
YPW2879	4	7006	7	7003	Daughter	50	75	No
YPW2879	4	7007	7	7005	Mother	66	NA	No
YPW2879	4	7008	7	7005	Daughter	66	NA	No
YPW2879	4	7009	7	7006	Mother	75	NA	No
YPW2879	4	7010	7	7006	Daughter	75	NA	No
YPW2879	4	7011	7	7004	Mother	55	73	No
YPW2879	4	7012	7	7004	Daughter	55	77	No
YPW2879	4	7013	7	7011	Mother	73	NA	No
YPW2879	4	7014	7	7011	Daughter	73	NA	No
YPW2879	4	7015	7	7012	Mother	77	NA	No
YPW2879	4	7016	7	7012	Daughter	77	NA	No
YPW2879	4	7017	7	7002	Mother	36	54	No
YPW2879	4	7018	7	7002	Daughter	36	56	No
YPW2879	4	7019	7	7017	Mother	54	NA	No
YPW2879	4	7020	7	7017	Daughter	54	NA	No
YPW2879	4	7021	7	7018	Mother	56	78	No
YPW2879	4	7022	7	7018	Daughter	56	79	No
YPW2879	4	7023	7	7021	Mother	78	NA	No
YPW2879	4	7024	7	7021	Daughter	78	NA	No
YPW2879	4	7025	7	7022	Mother	79	NA	No
YPW2879	4	7026	7	7022	Daughter	79	NA	No
YPW2879	4	8	8	NA	NA	NA	14	No
YPW2879	4	8001	8	8	Mother	14	34	No
YPW2879	4	8002	8	8	Daughter	14	35	No
YPW2879	4	8003	8	8001	Mother	34	57	No
YPW2879	4	8004	8	8001	Daughter	34	57	No
YPW2879	4	8005	8	8003	Mother	57	79	No
YPW2879	4	8006	8	8003	Daughter	57	78	No
YPW2879	4	8007	8	8005	Mother	79	NA	No
YPW2879	4	8008	8	8005	Daughter	79	NA	No
YPW2879	4	8009	8	8006	Mother	78	NA	No
YPW2879	4	8010	8	8006	Daughter	78	NA	No
YPW2879	4	8011	8	8004	Mother	57	71	No
YPW2879	4	8012	8	8004	Daughter	57	79	No
YPW2879	4	8013	8	8011	Mother	71	NA	No
YPW2879	4	8014	8	8011	Daughter	71	NA	No
YPW2879	4	8015	8	8012	Mother	79	NA	No
YPW2879	4	8016	8	8012	Daughter	79	NA	No
YPW2879	4	8017	8	8002	Mother	35	57	No
YPW2879	4	8018	8	8002	Daughter	35	66	No
YPW2879	4	8019	8	8017	Mother	57	78	No
YPW2879	4	8020	8	8017	Daughter	57	NA	No
YPW2879	4	8021	8	8019	Mother	78	NA	No
YPW2879	4	8022	8	8019	Daughter	78	NA	No
YPW2879	4	8023	8	8018	Mother	66	NA	No
YPW2879	4	8024	8	8018	Daughter	66	NA	No
YPW2868	1	1	1	NA	NA	NA	9	No
YPW2868	1	1001	1	1	Mother	9	24	No
YPW2868	1	1002	1	1	Daughter	9	39	No
YPW2868	1	1003	1	1001	Mother	24	40	No
YPW2868	1	1004	1	1001	Daughter	24	44	No
YPW2868	1	1005	1	1003	Mother	40	60	No
YPW2868	1	1006	1	1003	Daughter	40	63	No
YPW2868	1	1007	1	1005	Mother	60	78	No
YPW2868	1	1008	1	1005	Daughter	60	77	No
YPW2868	1	1009	1	1007	Mother	78	NA	No
YPW2868	1	1010	1	1007	Daughter	78	NA	No
YPW2868	1	1011	1	1008	Mother	77	NA	No
YPW2868	1	1012	1	1008	Daughter	77	NA	No
YPW2868	1	1013	1	1006	Mother	63	NA	No
YPW2868	1	1014	1	1006	Daughter	63	80	No
YPW2868	1	1015	1	1014	Mother	80	NA	No
YPW2868	1	1016	1	1014	Daughter	80	NA	No
YPW2868	1	1017	1	1004	Mother	44	69	No
YPW2868	1	1018	1	1004	Daughter	44	74	No
YPW2868	1	1019	1	1017	Mother	69	NA	No
YPW2868	1	1020	1	1017	Daughter	69	NA	No
YPW2868	1	1021	1	1018	Mother	74	NA	No
YPW2868	1	1022	1	1018	Daughter	74	NA	No
YPW2868	1	1023	1	1002	Mother	39	57	No
YPW2868	1	1024	1	1002	Daughter	39	60	No
YPW2868	1	1025	1	1023	Mother	57	76	No
YPW2868	1	1026	1	1023	Daughter	57	77	No
YPW2868	1	1027	1	1025	Mother	76	NA	No
YPW2868	1	1028	1	1025	Daughter	76	NA	No
YPW2868	1	1029	1	1026	Mother	77	NA	No
YPW2868	1	1030	1	1026	Daughter	77	NA	No
YPW2868	1	1031	1	1024	Mother	60	76	No
YPW2868	1	1032	1	1024	Daughter	60	NA	No
YPW2868	1	1033	1	1031	Mother	76	NA	No
YPW2868	1	1034	1	1031	Daughter	76	NA	No
YPW2868	1	2	2	NA	NA	NA	13	No
YPW2868	1	2001	2	2	Mother	13	31	No
YPW2868	1	2002	2	2	Daughter	13	33	No
YPW2868	1	2003	2	2001	Mother	31	47	No
YPW2868	1	2004	2	2001	Daughter	31	51	No
YPW2868	1	2005	2	2003	Mother	47	64	No
YPW2868	1	2006	2	2003	Daughter	47	78	No
YPW2868	1	2007	2	2005	Mother	64	80	No
YPW2868	1	2008	2	2005	Daughter	64	NA	No
YPW2868	1	2009	2	2007	Mother	80	NA	No
YPW2868	1	2010	2	2007	Daughter	80	NA	No
YPW2868	1	2011	2	2006	Mother	78	NA	No
YPW2868	1	2012	2	2006	Daughter	78	NA	No
YPW2868	1	2013	2	2004	Mother	51	71	No
YPW2868	1	2014	2	2004	Daughter	51	71	No
YPW2868	1	2015	2	2013	Mother	71	NA	No
YPW2868	1	2016	2	2013	Daughter	71	NA	No
YPW2868	1	2017	2	2014	Mother	71	NA	No
YPW2868	1	2018	2	2014	Daughter	71	NA	No
YPW2868	1	2019	2	2002	Mother	33	58	No
YPW2868	1	2020	2	2002	Daughter	33	68	No
YPW2868	1	2021	2	2019	Mother	58	NA	No
YPW2868	1	2022	2	2019	Daughter	58	NA	No
YPW2868	1	2023	2	2020	Mother	68	NA	No
YPW2868	1	2024	2	2020	Daughter	68	NA	No
YPW2868	1	3	3	NA	NA	NA	11	No
YPW2868	1	3001	3	3	Mother	11	28	No
YPW2868	1	3002	3	3	Daughter	11	32	No
YPW2868	1	3003	3	3001	Mother	28	47	No
YPW2868	1	3004	3	3002	Daughter	28	56	No
YPW2868	1	3005	3	3003	Mother	47	65	No
YPW2868	1	3006	3	3003	Daughter	47	68	No
YPW2868	1	3007	3	3005	Mother	65	NA	No
YPW2868	1	3008	3	3005	Daughter	65	NA	No
YPW2868	1	3009	3	3006	Mother	68	NA	No
YPW2868	1	3010	3	3006	Daughter	68	NA	No
YPW2868	1	3011	3	3004	Mother	56	71	No
YPW2868	1	3012	3	3004	Daughter	56	NA	No
YPW2868	1	3013	3	3011	Mother	71	NA	No
YPW2868	1	3014	3	3011	Daughter	71	NA	No
YPW2868	1	3015	3	3002	Mother	32	50	No
YPW2868	1	3016	3	3002	Daughter	32	63	No
YPW2868	1	3017	3	3015	Mother	50	69	No
YPW2868	1	3018	3	3015	Daughter	50	76	No
YPW2868	1	3019	3	3017	Mother	69	NA	No
YPW2868	1	3020	3	3017	Daughter	69	NA	No
YPW2868	1	3021	3	3018	Mother	76	NA	No
YPW2868	1	3022	3	3018	Daughter	76	NA	No
YPW2868	1	3023	3	3016	Mother	63	NA	No
YPW2868	1	3024	3	3016	Daughter	63	NA	No
YPW2868	1	4	4	NA	NA	NA	8	No
YPW2868	1	4001	4	4	Mother	8	22	No
YPW2868	1	4002	4	4	Daughter	8	26	No
YPW2868	1	4003	4	4001	Mother	22	36	No
YPW2868	1	4004	4	4001	Daughter	22	42	No
YPW2868	1	4005	4	4003	Mother	36	52	No
YPW2868	1	4006	4	4003	Daughter	36	54	No
YPW2868	1	4007	4	4005	Mother	52	69	No
YPW2868	1	4008	4	4005	Daughter	52	70	No
YPW2868	1	4009	4	4007	Mother	69	NA	No
YPW2868	1	4010	4	4007	Daughter	69	NA	No
YPW2868	1	4011	4	4008	Mother	70	NA	No
YPW2868	1	4012	4	4008	Daughter	70	NA	No
YPW2868	1	4013	4	4006	Mother	54	69	No
YPW2868	1	4014	4	4006	Daughter	54	75	No
YPW2868	1	4015	4	4013	Mother	69	NA	No
YPW2868	1	4016	4	4013	Daughter	69	NA	No
YPW2868	1	4017	4	4014	Mother	75	NA	No
YPW2868	1	4018	4	4014	Daughter	75	NA	No
YPW2868	1	4019	4	4004	Mother	42	57	No
YPW2868	1	4020	4	4004	Daughter	42	63	No
YPW2868	1	4021	4	4019	Mother	57	74	No
[truncated: 1,637 more rows]
