# Supplementary material for: Fitness effects of altering gene expression noise in Saccharomyces cerevisiae
Source: eLife. 2018 Aug 20;7:e37272. doi: 10.7554/eLife.37272 (PMC6133559; doi:10.7554/eLife.37272)
Supplement: Figure 5—figure supplement 1—source data 2. — These data were used to make Figure 5—figure supplement 1. [file elife-37272-fig5-figsupp1-data2.xlsx]

## Sheet: Legend
Figure 5 - figure supplement 1 - Source Data 2
Summary statistics for comparing the distributions of single-cell doubling time between genotypes with different expression noise levels.
These data were used to make Figure 5 - figure supplement 1.
Headers	Description
Strain	Name of yeast strain.
Pair	Identifier for pair of genotypes with similar median TDH3 expression level but different levels of expression noise.
Median.Expression	Median TDH3 expression level as measured in Figure 4 - Source Data 1.
Noise.Expression	TDH3 expression noise as measured in Figure 4 - Source Data 1.
N.Cells	Number of cells for which doubling time was quantified.
Doubling.Mean	Mean doubling time among all cells sharing the same genotype.
Doubling.Median	Median doubling time among all cells sharing the same genotype.
Doubling.SD	Standard deviation of doubling time among all cells sharing the same genotype.
Doubling.CV	Coefficient of variation of doubling time among all cells sharing the same genotype.
Doubling.Fano	Noise strength of doubling time among all cells sharing the same genotype.
Pval.Mean	P-value of permutation tests used to compare mean doubling time between the two genotypes of same pair.
Pval.Median	P-value of permutation tests used to compare median doubling time between the two genotypes of same pair.
Pval.SD	P-value of permutation tests used to compare standard deviation of doubling time between the two genotypes of same pair.

## Sheet: Data
Strain	Pair	Median.Expression	Noise.Expression	N.Cells	Doubling.Mean	Doubling.Median	Doubling.SD	Doubling.CV	Doubling.Fano	Pval.Mean	Pval.Median	Pval.SD
YPW2879	B	0.192419	0.362784	392	115.653	114	25.242	0.218256	5.50922	0.83002	0.29208	0.01664
YPW2868	B	0.184194	2.35575	412	115.209	108	30.7316	0.266747	8.19758	0.83002	0.29208	0.01664
YPW3064	D	0.960112	1.08478	460	109.343	102	29.0556	0.265728	7.7209	0.4898	0.12514	0.01954
YPW3047	D	0.899645	2.17322	362	107.801	96	35.0364	0.32501	11.3872	0.4898	0.12514	0.01954
