# Supplementary material for: Fitness effects of altering gene expression noise in Saccharomyces cerevisiae
Source: eLife. 2018 Aug 20;7:e37272. doi: 10.7554/eLife.37272 (PMC6133559; doi:10.7554/eLife.37272)
Supplement: Figure 6—source data 1. — Data used to make Figure 6B and D and generated with the Matlab code provided in Supplementary file 5. [file elife-37272-fig6-data1.xlsx]

## Sheet: Legend
Figure 6 - Source Data 1
Fitness data obtained by modeling the growth of cell populations with different levels of mean expression and expression noise.
These data were used to make Figure 6B & 6D and were generated with the Matlab script provided in Supplementary File 5.
Spreadsheet	Noise range	Function relating the doubling time of single cells to their expression level.
Linear_FANO	Calculated as the variance divided by the mean level of expression.	Linear function of form DT = -40 x E + 160
Linear_SD	Calculated as the standard deviation of expression.	Linear function of form DT = -40 x E + 160
Linear_CV	Calculated as the standard deviation divided by the mean level of expression.	Linear function of form DT = -40 x E + 160
Peaked_FANO	Calculated as the variance divided by the mean level of expression.	Gaussian function of form DT = -160 x exp(-(E - 1)2/0.18)
Peaked_SD	Calculated as the standard deviation of expression.	Gaussian function of form DT = -160 x exp(-(E - 1)2/0.18)
Peaked_CV	Calculated as the standard deviation divided by the mean level of expression.	Gaussian function of form DT = -160 x exp(-(E - 1)2/0.18)
Headers	Description
Mean	Mean expression level of the population.
Noise (Fano)	Expression noise of the population calculated as the variance divided by the mean.
Noise (SD)	Expression noise of the population calculated as the standard deviation.
Noise (CV)	Expression noise of the population calculated as the standard deviation divided by the mean.
Iterations	Number of times the growth of the same population was simulated (number of replicates).
Fitness	Mean fitness observed across all iterations.
95% CI / 2	Half the size of the 95% confidence interval of fitness calculated from all iterations.

## Sheet: Linear_FANO
Mean	Noise (Fano)	Noise (SD)	Iterations	Fitness	95% CI / 2
0.1	0.05	0.070711	100	0.92747	0.00064851
0.1	0.1	0.1	100	0.92761	0.00064299
0.1	0.2	0.14142	100	0.92721	0.00066381
0.1	0.4	0.2	100	0.92716	0.00068484
0.1	0.6	0.24495	100	0.92704	0.00060057
0.1	0.8	0.28284	100	0.92735	0.00066567
0.1	1	0.31623	100	0.92721	0.00063476
0.1	1.5	0.3873	100	0.92781	0.00066632
0.1	2	0.44721	100	0.92779	0.00063517
0.2	0.05	0.1	100	0.9331	0.00066579
0.2	0.1	0.14142	100	0.93354	0.00068275
0.2	0.2	0.2	100	0.93311	0.00064984
0.2	0.4	0.28284	100	0.9334	0.00067073
0.2	0.6	0.34641	100	0.93372	0.00071021
0.2	0.8	0.4	100	0.93335	0.00066198
0.2	1	0.44721	100	0.93367	0.00064331
0.2	1.5	0.54772	100	0.93466	0.00064657
0.2	2	0.63246	100	0.93494	0.00071561
0.3	0.05	0.12247	100	0.93877	0.00068436
0.3	0.1	0.17321	100	0.93911	0.00067821
0.3	0.2	0.24495	100	0.93945	0.0006538
0.3	0.4	0.34641	100	0.93963	0.00065434
0.3	0.6	0.42426	100	0.94035	0.00065892
0.3	0.8	0.4899	100	0.9409	0.00068185
0.3	1	0.54772	100	0.94102	0.00066539
0.3	1.5	0.67082	100	0.94214	0.00062158
0.3	2	0.7746	100	0.94339	0.00067825
0.4	0.05	0.14142	100	0.94535	0.00064076
0.4	0.1	0.2	100	0.94556	0.00071006
0.4	0.2	0.28284	100	0.9466	0.00067322
0.4	0.4	0.4	100	0.94776	0.00066245
0.4	0.6	0.4899	100	0.9473	0.00069179
0.4	0.8	0.56569	100	0.9481	0.00076346
0.4	1	0.63246	100	0.94874	0.000699
0.4	1.5	0.7746	100	0.95029	0.00064998
0.4	2	0.89443	100	0.95181	0.00065755
0.5	0.05	0.15811	100	0.95327	0.00073947
0.5	0.1	0.22361	100	0.95334	0.00067887
0.5	0.2	0.31623	100	0.95377	0.00065702
0.5	0.4	0.44721	100	0.95507	0.00065143
0.5	0.6	0.54772	100	0.95582	0.00070631
0.5	0.8	0.63246	100	0.95636	0.00076496
0.5	1	0.70711	100	0.95727	0.0007681
0.5	1.5	0.86603	100	0.9599	0.00070811
0.5	2	1	100	0.96169	0.00064518
0.6	0.05	0.17321	100	0.96146	0.00071269
0.6	0.1	0.24495	100	0.96171	0.00070531
0.6	0.2	0.34641	100	0.96214	0.0007353
0.6	0.4	0.4899	100	0.96288	0.00070038
0.6	0.6	0.6	100	0.96421	0.00073879
0.6	0.8	0.69282	100	0.96562	0.00073102
0.6	1	0.7746	100	0.96661	0.00074803
0.6	1.5	0.94868	100	0.96985	0.00070908
0.6	2	1.0954	100	0.97228	0.00080585
0.7	0.05	0.18708	100	0.96996	0.00074664
0.7	0.1	0.26458	100	0.97	0.00067006
0.7	0.2	0.37417	100	0.97104	0.00075439
0.7	0.4	0.52915	100	0.97215	0.00076202
0.7	0.6	0.64807	100	0.97345	0.00074694
0.7	0.8	0.74833	100	0.97487	0.00079425
0.7	1	0.83666	100	0.97617	0.00076955
0.7	1.5	1.0247	100	0.97998	0.00078128
0.7	2	1.1832	100	0.98467	0.00078009
0.8	0.05	0.2	100	0.97856	0.00074678
0.8	0.1	0.28284	100	0.97934	0.00081925
0.8	0.2	0.4	100	0.98017	0.00081076
0.8	0.4	0.56569	100	0.98226	0.00078846
0.8	0.6	0.69282	100	0.98385	0.00080581
0.8	0.8	0.8	100	0.98532	0.00082279
0.8	1	0.89443	100	0.9874	0.0007358
0.8	1.5	1.0954	100	0.99274	0.00083793
0.8	2	1.2649	100	0.99754	0.00091581
0.9	0.05	0.21213	100	0.9885	0.00080434
0.9	0.1	0.3	100	0.98901	0.00086836
0.9	0.2	0.42426	100	0.99004	0.00087368
0.9	0.4	0.6	100	0.99235	0.0007733
0.9	0.6	0.73485	100	0.99441	0.00086738
0.9	0.8	0.84853	100	0.99617	0.00087191
0.9	1	0.94868	100	0.99926	0.00075971
0.9	1.5	1.1619	100	1.0066	0.00093339
0.9	2	1.3416	100	1.0139	0.00098764
1	0.05	0.22361	100	0.9993	0.00083929
1	0.1	0.31623	100	1	0
1	0.2	0.44721	100	1.0008	0.00088764
1	0.4	0.63246	100	1.0039	0.00087704
1	0.6	0.7746	100	1.0065	0.000864
1	0.8	0.89443	100	1.0092	0.00085531
1	1	1	100	1.0128	0.00093506
1	1.5	1.2247	100	1.0223	0.0010097
1	2	1.4142	100	1.0322	0.0011873

## Sheet: Linear_SD
Mean	Noise (SD)	Iterations	Fitness	95% CI / 2
0.1	0.05	100	0.92826	0.00066335
0.1	0.1	100	0.92838	0.00057726
0.1	0.2	100	0.9283	0.00063591
0.1	0.4	100	0.92853	0.000602
0.1	0.6	100	0.92979	0.0006559
0.1	0.8	100	0.93155	0.00064059
0.1	1	100	0.93356	0.00066845
0.1	1.5	100	0.94176	0.00068493
0.1	2	100	0.95687	0.00073668
0.2	0.05	100	0.93421	0.00060624
0.2	0.1	100	0.93418	0.00064777
0.2	0.2	100	0.93433	0.00065646
0.2	0.4	100	0.93456	0.00061485
0.2	0.6	100	0.93574	0.00062041
0.2	0.8	100	0.93752	0.00063487
0.2	1	100	0.94043	0.00063067
0.2	1.5	100	0.94901	0.00069323
0.2	2	100	0.9662	0.00072491
0.3	0.05	100	0.94042	0.0006761
0.3	0.1	100	0.93996	0.00059668
0.3	0.2	100	0.94031	0.00063347
0.3	0.4	100	0.94116	0.00067728
0.3	0.6	100	0.94249	0.00061759
0.3	0.8	100	0.94461	0.00065643
0.3	1	100	0.94716	0.00064906
0.3	1.5	100	0.95789	0.00074649
0.3	2	100	0.97599	0.00080083
0.4	0.05	100	0.94606	0.00062844
0.4	0.1	100	0.94601	0.0006822
0.4	0.2	100	0.94684	0.00071312
0.4	0.4	100	0.94857	0.00064771
0.4	0.6	100	0.94931	0.00069174
0.4	0.8	100	0.95178	0.00063208
0.4	1	100	0.95469	0.00070891
0.4	1.5	100	0.96572	0.00065597
0.4	2	100	0.98723	0.00080145
0.5	0.05	100	0.95434	0.00068036
0.5	0.1	100	0.95422	0.00071211
0.5	0.2	100	0.95412	0.00066777
0.5	0.4	100	0.95549	0.00063156
0.5	0.6	100	0.95714	0.00070506
0.5	0.8	100	0.95977	0.00064372
0.5	1	100	0.96255	0.0006701
0.5	1.5	100	0.97534	0.00075466
0.5	2	100	0.99938	0.00098274
0.6	0.05	100	0.96347	0.0007438
0.6	0.1	100	0.9627	0.00063395
0.6	0.2	100	0.96269	0.00073418
0.6	0.4	100	0.96347	0.00074098
0.6	0.6	100	0.96515	0.00064207
0.6	0.8	100	0.9681	0.00072678
0.6	1	100	0.97243	0.00073788
0.6	1.5	100	0.98633	0.00085588
0.6	2	100	1.0138	0.0011021
0.7	0.05	100	0.97143	0.00078965
0.7	0.1	100	0.97127	0.00081146
0.7	0.2	100	0.97154	0.00081667
0.7	0.4	100	0.97176	0.00069109
0.7	0.6	100	0.97417	0.00071209
0.7	0.8	100	0.9769	0.00071513
0.7	1	100	0.9808	0.00072808
0.7	1.5	100	0.99813	0.00095253
0.7	2	100	1.0289	0.0010791
0.8	0.05	100	0.979	0.0007532
0.8	0.1	100	0.97912	0.00069411
0.8	0.2	100	0.97984	0.00079506
0.8	0.4	100	0.98122	0.00079859
0.8	0.6	100	0.98375	0.00076071
0.8	0.8	100	0.98693	0.00077525
0.8	1	100	0.99201	0.00091407
0.8	1.5	100	1.0097	0.0010193
0.8	2	100	1.0478	0.0015185
0.9	0.05	100	0.98853	0.00086205
0.9	0.1	100	0.98835	0.00094025
0.9	0.2	100	0.98963	0.00068025
0.9	0.4	100	0.99081	0.00078868
0.9	0.6	100	0.99311	0.0007085
0.9	0.8	100	0.99719	0.00085017
0.9	1	100	1.0021	0.00093517
0.9	1.5	100	1.0233	0.00099666
0.9	2	100	1.0683	0.0013959
1	0.05	100	1.0004	0.00077778
1	0.1	100	1	0
1	0.2	100	0.99997	0.00084426
1	0.4	100	1.0019	0.00089211
1	0.6	100	1.0044	0.00087158
1	0.8	100	1.0081	0.00083973
1	1	100	1.0142	0.00091746
1	1.5	100	1.0381	0.0012129
1	2	100	1.0925	0.0019197

## Sheet: Linear_CV
Mean	Noise (CV)	Noise (SD)	Iterations	Fitness	95% CI / 2
0.1	0.05	0.005	100	0.92797	0.0006429
0.1	0.1	0.01	100	0.92859	0.00066691
0.1	0.2	0.02	100	0.9282	0.00063598
0.1	0.4	0.04	100	0.92841	0.00063187
0.1	0.6	0.06	100	0.92821	0.00068321
0.1	0.8	0.08	100	0.92785	0.00064587
0.1	1	0.1	100	0.9277	0.00061178
0.1	1.5	0.15	100	0.92845	0.00065604
0.1	2	0.2	100	0.92795	0.00067984
0.2	0.05	0.01	100	0.9343	0.00063903
0.2	0.1	0.02	100	0.93424	0.00064417
0.2	0.2	0.04	100	0.93412	0.00070663
0.2	0.4	0.08	100	0.93428	0.00066519
0.2	0.6	0.12	100	0.93423	0.00066739
0.2	0.8	0.16	100	0.93411	0.00067799
0.2	1	0.2	100	0.93396	0.00067446
0.2	1.5	0.3	100	0.93435	0.00066032
0.2	2	0.4	100	0.93463	0.00064771
0.3	0.05	0.015	100	0.94017	0.00067323
0.3	0.1	0.03	100	0.93991	0.00067208
0.3	0.2	0.06	100	0.94022	0.00069398
0.3	0.4	0.12	100	0.9402	0.00068493
0.3	0.6	0.18	100	0.94023	0.00062768
0.3	0.8	0.24	100	0.94067	0.00066729
0.3	1	0.3	100	0.94058	0.00070029
0.3	1.5	0.45	100	0.94132	0.00063998
0.3	2	0.6	100	0.94259	0.00065841
0.4	0.05	0.02	100	0.94592	0.00066795
0.4	0.1	0.04	100	0.94597	0.00065224
0.4	0.2	0.08	100	0.94613	0.00066422
0.4	0.4	0.16	100	0.94632	0.00067492
0.4	0.6	0.24	100	0.94703	0.00066315
0.4	0.8	0.32	100	0.94776	0.00075858
0.4	1	0.4	100	0.94785	0.00068486
0.4	1.5	0.6	100	0.94959	0.00072562
0.4	2	0.8	100	0.95167	0.00068775
0.5	0.05	0.025	100	0.95429	0.00076786
0.5	0.1	0.05	100	0.95353	0.00075894
0.5	0.2	0.1	100	0.95382	0.00065979
0.5	0.4	0.2	100	0.95437	0.00066052
0.5	0.6	0.3	100	0.95511	0.00074546
0.5	0.8	0.4	100	0.95531	0.00070804
0.5	1	0.5	100	0.95665	0.00072121
0.5	1.5	0.75	100	0.95849	0.00068203
0.5	2	1	100	0.9631	0.00069462
0.6	0.05	0.03	100	0.96262	0.0007309
0.6	0.1	0.06	100	0.9627	0.00068896
0.6	0.2	0.12	100	0.96245	0.0007447
0.6	0.4	0.24	100	0.96282	0.00068521
0.6	0.6	0.36	100	0.96297	0.00066562
0.6	0.8	0.48	100	0.96419	0.00077478
0.6	1	0.6	100	0.96491	0.00071726
0.6	1.5	0.9	100	0.96992	0.000722
0.6	2	1.2	100	0.97611	0.00077916
0.7	0.05	0.035	100	0.97054	0.0007376
0.7	0.1	0.07	100	0.97066	0.0007284
0.7	0.2	0.14	100	0.97114	0.000779
0.7	0.4	0.28	100	0.97108	0.00085012
0.7	0.6	0.42	100	0.97181	0.00077478
0.7	0.8	0.56	100	0.97331	0.00072453
0.7	1	0.7	100	0.97529	0.00077825
0.7	1.5	1.05	100	0.98202	0.00080363
0.7	2	1.4	100	0.99244	0.00095452
0.8	0.05	0.04	100	0.97916	0.00078156
0.8	0.1	0.08	100	0.97849	0.00073989
0.8	0.2	0.16	100	0.97934	0.00072168
0.8	0.4	0.32	100	0.98038	0.00081642
0.8	0.6	0.48	100	0.98181	0.00073738
0.8	0.8	0.64	100	0.98402	0.00076929
0.8	1	0.8	100	0.98642	0.00077357
0.8	1.5	1.2	100	0.99674	0.00089122
0.8	2	1.6	100	1.0139	0.0010422
0.9	0.05	0.045	100	0.98868	0.00085664
0.9	0.1	0.09	100	0.98865	0.00081127
0.9	0.2	0.18	100	0.98899	0.00079337
0.9	0.4	0.36	100	0.99076	0.00088688
0.9	0.6	0.54	100	0.99241	0.00082828
0.9	0.8	0.72	100	0.99513	0.00081466
0.9	1	0.9	100	0.99922	0.00093408
0.9	1.5	1.35	100	1.0156	0.0010203
0.9	2	1.8	100	1.0449	0.0014215

## Sheet: Peaked_FANO
Mean	Noise (Fano)	Noise (SD)	Iterations	Fitness	95% CI / 2
0.1	0	0	100	0.86124	0.00045916
0.1	0.05	0.070711	100	0.86158	0.0004069
0.1	0.1	0.1	100	0.86189	0.00041104
0.1	0.15	0.12247	100	0.86225	0.00043315
0.1	0.2	0.14142	100	0.86262	0.00042418
0.1	0.3	0.17321	100	0.86299	0.00042243
0.1	0.4	0.2	100	0.86417	0.00040655
0.1	0.6	0.24495	100	0.86528	0.00041619
0.1	0.8	0.28284	100	0.86759	0.00040745
0.1	1	0.31623	100	0.86901	0.00042396
0.1	1.2	0.34641	100	0.87069	0.00045982
0.1	1.4	0.37417	100	0.87228	0.00046004
0.2	0	0	100	0.86308	0.00042012
0.2	0.05	0.1	100	0.86408	0.0003962
0.2	0.1	0.14142	100	0.86525	0.00043077
0.2	0.15	0.17321	100	0.86628	0.00042515
0.2	0.2	0.2	100	0.86764	0.00040339
0.2	0.3	0.24495	100	0.87016	0.00043447
0.2	0.4	0.28284	100	0.87225	0.00042362
0.2	0.6	0.34641	100	0.87624	0.00045274
0.2	0.8	0.4	100	0.88006	0.00045247
0.2	1	0.44721	100	0.88282	0.00042345
0.2	1.2	0.4899	100	0.88462	0.0004478
0.2	1.4	0.52915	100	0.88619	0.00041456
0.3	0	0	100	0.86715	0.00042683
0.3	0.05	0.12247	100	0.86972	0.00040729
0.3	0.1	0.17321	100	0.87199	0.00044732
0.3	0.15	0.21213	100	0.87447	0.00041029
0.3	0.2	0.24495	100	0.87694	0.00040814
0.3	0.3	0.3	100	0.88161	0.00043569
0.3	0.4	0.34641	100	0.88536	0.00042174
0.3	0.6	0.42426	100	0.8899	0.00045153
0.3	0.8	0.4899	100	0.89291	0.00047608
0.3	1	0.54772	100	0.89419	0.00046086
0.3	1.2	0.6	100	0.89514	0.00045342
0.3	1.4	0.64807	100	0.89487	0.00045752
0.4	0	0	100	0.87455	0.0004486
0.4	0.05	0.14142	100	0.87963	0.00044496
0.4	0.1	0.2	100	0.88423	0.00045002
0.4	0.15	0.24495	100	0.88868	0.00043622
0.4	0.2	0.28284	100	0.89179	0.00046025
0.4	0.3	0.34641	100	0.89678	0.00049309
0.4	0.4	0.4	100	0.89975	0.00043995
0.4	0.6	0.4899	100	0.90192	0.00043839
0.4	0.8	0.56569	100	0.9019	0.00045645
0.4	1	0.63246	100	0.90103	0.00047489
0.4	1.2	0.69282	100	0.90023	0.00046594
0.4	1.4	0.74833	100	0.89888	0.00047516
0.5	0	0	100	0.88692	0.00041527
0.5	0.05	0.15811	100	0.89733	0.0004365
0.5	0.1	0.22361	100	0.9042	0.00043363
0.5	0.15	0.27386	100	0.90793	0.00046599
0.5	0.2	0.31623	100	0.91074	0.00045995
0.5	0.3	0.3873	100	0.91312	0.00044922
0.5	0.4	0.44721	100	0.91332	0.00048254
0.5	0.6	0.54772	100	0.91106	0.00047842
0.5	0.8	0.63246	100	0.908	0.00050308
0.5	1	0.70711	100	0.90491	0.0004831
0.5	1.2	0.7746	100	0.90199	0.0005069
0.5	1.4	0.83666	100	0.89985	0.00048742
0.6	0	0	100	0.91426	0.00048189
0.6	0.05	0.17321	100	0.92585	0.00048007
0.6	0.1	0.24495	100	0.93016	0.00051864
0.6	0.15	0.3	100	0.93131	0.00059112
0.6	0.2	0.34641	100	0.93042	0.00049616
0.6	0.3	0.42426	100	0.92673	0.00054879
0.6	0.4	0.4899	100	0.92302	0.00050983
0.6	0.6	0.6	100	0.91607	0.00048883
0.6	0.8	0.69282	100	0.9103	0.00046965
0.6	1	0.7746	100	0.90606	0.00046353
0.6	1.2	0.84853	100	0.90255	0.00050488
0.6	1.4	0.91652	100	0.89964	0.0004642
0.7	0	0	100	0.95803	0.00052988
0.7	0.05	0.18708	100	0.96478	0.00060924
0.7	0.1	0.26458	100	0.95973	0.00064256
0.7	0.15	0.32404	100	0.95349	0.00056563
0.7	0.2	0.37417	100	0.94712	0.00053015
0.7	0.3	0.45826	100	0.93729	0.00052639
0.7	0.4	0.52915	100	0.92894	0.00046285
0.7	0.6	0.64807	100	0.91778	0.00049598
0.7	0.8	0.74833	100	0.91034	0.00045272
0.7	1	0.83666	100	0.90561	0.00051823
0.7	1.2	0.91652	100	0.90119	0.00050019
0.7	1.4	0.98995	100	0.89815	0.00047824
0.8	0	0	100	1.0334	0.00080483
0.8	0.05	0.2	100	1.0079	0.00073601
0.8	0.1	0.28284	100	0.98611	0.00063118
0.8	0.15	0.34641	100	0.96953	0.00067692
0.8	0.2	0.4	100	0.95792	0.00059341
0.8	0.3	0.4899	100	0.94233	0.00055069
0.8	0.4	0.56569	100	0.93134	0.00047028
0.8	0.6	0.69282	100	0.91806	0.00055036
0.8	0.8	0.8	100	0.90949	0.00050056
0.8	1	0.89443	100	0.90417	0.00046614
0.8	1.2	0.9798	100	0.89977	0.00045195
0.8	1.4	1.0583	100	0.89658	0.00046979
0.9	0	0	100	1.1329	0.0024686
0.9	0.05	0.21213	100	1.0409	0.00099176
0.9	0.1	0.3	100	1.0004	0.00064071
0.9	0.15	0.36742	100	0.97761	0.00056296
0.9	0.2	0.42426	100	0.96169	0.00057681
0.9	0.3	0.51962	100	0.94262	0.00052896
0.9	0.4	0.6	100	0.92999	0.00050153
0.9	0.6	0.73485	100	0.91609	0.0005163
0.9	0.8	0.84853	100	0.90791	0.00047115
0.9	1	0.94868	100	0.90202	0.00045229
0.9	1.2	1.0392	100	0.89798	0.00042384
0.9	1.4	1.1225	100	0.8946	0.00043539
1	0	0	100	1.1891	0.0046461
1	0.05	0.22361	100	1.0484	0.00098739
1	0.1	0.31623	100	1	0
1	0.15	0.3873	100	0.97494	0.00067209
1	0.2	0.44721	100	0.95939	0.00059516
1	0.3	0.54772	100	0.93915	0.00050692
1	0.4	0.63246	100	0.92737	0.00046066
1	0.6	0.7746	100	0.91317	0.00047624
1	0.8	0.89443	100	0.90526	0.00045196
1	1	1	100	0.89962	0.00046314
1	1.2	1.0954	100	0.89588	0.00044798
1	1.4	1.1832	100	0.89314	0.00045458

## Sheet: Peaked_SD
Mean	Noise (SD)	Iterations	Fitness	95% CI / 2
0.1	0	100	0.75747	0.0016464
0.1	0.05	100	0.75729	0.0016648
0.1	0.1	100	0.7582	0.0016495
0.1	0.15	100	0.75867	0.0016529
0.1	0.2	100	0.75964	0.0016669
0.1	0.3	100	0.76338	0.0016771
0.1	0.4	100	0.76823	0.0017094
0.1	0.6	100	0.77615	0.0017116
0.1	0.8	100	0.77903	0.0017247
0.1	1	100	0.77873	0.0017127
0.1	1.2	100	0.77691	0.0017089
0.1	1.4	100	0.77515	0.0017192
0.2	0	100	0.75897	0.0017085
0.2	0.05	100	0.75924	0.0016894
0.2	0.1	100	0.75979	0.0016429
0.2	0.15	100	0.76135	0.0016729
0.2	0.2	100	0.76299	0.0016869
0.2	0.3	100	0.768	0.0016863
0.2	0.4	100	0.77364	0.001707
0.2	0.6	100	0.7812	0.00172
0.2	0.8	100	0.7823	0.001707
0.2	1	100	0.78082	0.0017148
0.2	1.2	100	0.77858	0.0017206
0.2	1.4	100	0.77608	0.0016827
0.3	0	100	0.76231	0.0016715
0.3	0.05	100	0.76277	0.0016624
0.3	0.1	100	0.76384	0.0016992
0.3	0.15	100	0.76536	0.0016386
0.3	0.2	100	0.76857	0.0017164
0.3	0.3	100	0.77546	0.0017131
0.3	0.4	100	0.78148	0.0017622
0.3	0.6	100	0.7866	0.001732
0.3	0.8	100	0.78571	0.0017645
0.3	1	100	0.78257	0.0017141
0.3	1.2	100	0.77986	0.0016943
0.3	1.4	100	0.77679	0.0017076
0.4	0	100	0.76878	0.0016958
0.4	0.05	100	0.76946	0.0017329
0.4	0.1	100	0.7709	0.0016927
0.4	0.15	100	0.77387	0.0017261
0.4	0.2	100	0.77772	0.0017048
0.4	0.3	100	0.78577	0.0017468
0.4	0.4	100	0.79104	0.0016936
0.4	0.6	100	0.79302	0.0017308
0.4	0.8	100	0.78902	0.0017411
0.4	1	100	0.7846	0.0017269
0.4	1.2	100	0.78084	0.0017318
0.4	1.4	100	0.778	0.0017134
0.5	0	100	0.77994	0.0017299
0.5	0.05	100	0.78185	0.0017288
0.5	0.1	100	0.78469	0.0017392
0.5	0.15	100	0.7884	0.0017412
0.5	0.2	100	0.79301	0.0017533
0.5	0.3	100	0.80009	0.0017883
0.5	0.4	100	0.80275	0.001752
0.5	0.6	100	0.79928	0.0017967
0.5	0.8	100	0.79228	0.0017394
0.5	1	100	0.78652	0.0017497
0.5	1.2	100	0.78201	0.001728
0.5	1.4	100	0.77837	0.0017268
0.6	0	100	0.80392	0.0017723
0.6	0.05	100	0.80506	0.001799
0.6	0.1	100	0.80803	0.0017861
0.6	0.15	100	0.81206	0.0017576
0.6	0.2	100	0.81567	0.0018106
0.6	0.3	100	0.81893	0.0018799
0.6	0.4	100	0.81629	0.0018106
0.6	0.6	100	0.80555	0.0018557
0.6	0.8	100	0.79514	0.0017526
0.6	1	100	0.78783	0.0017261
0.6	1.2	100	0.78278	0.0017404
0.6	1.4	100	0.77913	0.0017158
0.7	0	100	0.84231	0.0018584
0.7	0.05	100	0.84471	0.0018883
0.7	0.1	100	0.84663	0.0019046
0.7	0.15	100	0.84783	0.0018698
0.7	0.2	100	0.84732	0.00188
0.7	0.3	100	0.84059	0.0018596
0.7	0.4	100	0.82977	0.0018108
0.7	0.6	100	0.81057	0.0018093
0.7	0.8	100	0.79823	0.0018126
0.7	1	100	0.78915	0.0017205
0.7	1.2	100	0.78371	0.0017344
0.7	1.4	100	0.77961	0.0017309
0.8	0	100	0.90826	0.0020499
0.8	0.05	100	0.90797	0.0021145
0.8	0.1	100	0.90383	0.002054
0.8	0.15	100	0.89657	0.0019831
0.8	0.2	100	0.88572	0.0019841
0.8	0.3	100	0.86206	0.0019572
0.8	0.4	100	0.84219	0.0018236
0.8	0.6	100	0.81482	0.0017804
0.8	0.8	100	0.79957	0.0017524
0.8	1	100	0.79026	0.0017681
0.8	1.2	100	0.78433	0.0017642
0.8	1.4	100	0.77967	0.0017167
0.9	0	100	0.99538	0.0028816
0.9	0.05	100	0.98742	0.0029979
0.9	0.1	100	0.96881	0.0028028
0.9	0.15	100	0.9442	0.002285
0.9	0.2	100	0.91975	0.0021577
0.9	0.3	100	0.87872	0.001996
0.9	0.4	100	0.85075	0.0018954
0.9	0.6	100	0.81788	0.0017882
0.9	0.8	100	0.80076	0.0017758
0.9	1	100	0.79052	0.0017241
0.9	1.2	100	0.78476	0.0017524
0.9	1.4	100	0.78026	0.0017318
1	0	100	1.0442	0.0047054
1	0.05	100	1.0314	0.0034844
1	0.1	100	1	0
1	0.15	100	0.96507	0.0024365
1	0.2	100	0.93351	0.002156
1	0.3	100	0.88502	0.0020007
1	0.4	100	0.85378	0.0019071
1	0.6	100	0.81849	0.0018223
1	0.8	100	0.80113	0.0018015
1	1	100	0.79125	0.0017856
1	1.2	100	0.78449	0.0017141
1	1.4	100	0.77984	0.0017201

## Sheet: Peaked_CV
Mean	Noise (CV)	Noise (SD)	Iterations	Fitness	95% CI / 2
0.1	0	0	100	0.75747	0.0016464
0.1	0.05	0.005	100	0.75758	0.0016584
0.1	0.1	0.01	100	0.75743	0.0016949
0.1	0.15	0.015	100	0.75717	0.0016751
0.1	0.2	0.02	100	0.75751	0.0016895
0.1	0.3	0.03	100	0.75724	0.0016576
0.1	0.4	0.04	100	0.75729	0.0016699
0.1	0.6	0.06	100	0.75781	0.0016699
0.1	0.8	0.08	100	0.75762	0.0016754
0.1	1	0.1	100	0.75796	0.0016658
0.1	1.2	0.12	100	0.75826	0.0016613
0.1	1.4	0.14	100	0.75843	0.0016725
0.2	0	0	100	0.75897	0.0017085
0.2	0.05	0.01	100	0.75898	0.0016695
0.2	0.1	0.02	100	0.7592	0.0016714
0.2	0.15	0.03	100	0.7594	0.0016745
0.2	0.2	0.04	100	0.75902	0.0016786
0.2	0.3	0.06	100	0.75947	0.0016879
0.2	0.4	0.08	100	0.75914	0.001651
0.2	0.6	0.12	100	0.76004	0.0016964
0.2	0.8	0.16	100	0.76137	0.0016836
0.2	1	0.2	100	0.76294	0.0016868
0.2	1.2	0.24	100	0.76444	0.0016793
0.2	1.4	0.28	100	0.76688	0.0016904
0.3	0	0	100	0.76231	0.0016715
0.3	0.05	0.015	100	0.76209	0.001675
0.3	0.1	0.03	100	0.76254	0.001663
0.3	0.15	0.045	100	0.76266	0.001671
0.3	0.2	0.06	100	0.7627	0.0016822
0.3	0.3	0.09	100	0.76384	0.0017086
0.3	0.4	0.12	100	0.76441	0.0017039
0.3	0.6	0.18	100	0.76725	0.0016828
0.3	0.8	0.24	100	0.77095	0.0017063
0.3	1	0.3	100	0.77507	0.0017067
0.3	1.2	0.36	100	0.77933	0.0017389
0.3	1.4	0.42	100	0.78226	0.0017516
0.4	0	0	100	0.76878	0.0016958
0.4	0.05	0.02	100	0.76914	0.0017052
0.4	0.1	0.04	100	0.76971	0.0017209
0.4	0.15	0.06	100	0.7698	0.001696
0.4	0.2	0.08	100	0.77044	0.0016962
0.4	0.3	0.12	100	0.77215	0.0017044
0.4	0.4	0.16	100	0.77452	0.0016921
0.4	0.6	0.24	100	0.78073	0.0017079
0.4	0.8	0.32	100	0.78694	0.0017392
0.4	1	0.4	100	0.79116	0.0017549
0.4	1.2	0.48	100	0.7928	0.0016945
0.4	1.4	0.56	100	0.79341	0.0017886
0.5	0	0	100	0.77994	0.0017299
0.5	0.05	0.025	100	0.78068	0.0016887
0.5	0.1	0.05	100	0.78173	0.0017172
0.5	0.15	0.075	100	0.783	0.0017165
0.5	0.2	0.1	100	0.78464	0.0017343
0.5	0.3	0.15	100	0.78841	0.0017435
0.5	0.4	0.2	100	0.79273	0.0017435
0.5	0.6	0.3	100	0.80022	0.0018121
0.5	0.8	0.4	100	0.80284	0.0017877
0.5	1	0.5	100	0.80187	0.001775
0.5	1.2	0.6	100	0.79893	0.0017384
0.5	1.4	0.7	100	0.79596	0.0017644
0.6	0	0	100	0.80392	0.0017723
0.6	0.05	0.03	100	0.80406	0.0017739
0.6	0.1	0.06	100	0.80542	0.0017786
0.6	0.15	0.09	100	0.80721	0.0017821
0.6	0.2	0.12	100	0.80961	0.0017658
0.6	0.3	0.18	100	0.81436	0.0017966
0.6	0.4	0.24	100	0.8176	0.001823
0.6	0.6	0.36	100	0.8176	0.0018142
0.6	0.8	0.48	100	0.81204	0.0018115
0.6	1	0.6	100	0.80525	0.0017888
0.6	1.2	0.72	100	0.79883	0.0018395
0.6	1.4	0.84	100	0.79373	0.0017362
0.7	0	0	100	0.84231	0.0018584
0.7	0.05	0.035	100	0.84394	0.0018742
0.7	0.1	0.07	100	0.84526	0.001887
0.7	0.15	0.105	100	0.84706	0.0018761
0.7	0.2	0.14	100	0.84774	0.0019011
0.7	0.3	0.21	100	0.84724	0.0018546
0.7	0.4	0.28	100	0.84245	0.0018989
0.7	0.6	0.42	100	0.82772	0.0018478
0.7	0.8	0.56	100	0.81377	0.0017946
0.7	1	0.7	100	0.80365	0.0017904
0.7	1.2	0.84	100	0.79585	0.0017585
0.7	1.4	0.98	100	0.78983	0.0017244
0.8	0	0	100	0.90826	0.0020499
0.8	0.05	0.04	100	0.90844	0.0020871
0.8	0.1	0.08	100	0.90621	0.0021517
0.8	0.15	0.12	100	0.90195	0.0021051
0.8	0.2	0.16	100	0.89468	0.0020364
0.8	0.3	0.24	100	0.87659	0.0019175
0.8	0.4	0.32	100	0.85784	0.0019274
0.8	0.6	0.48	100	0.82927	0.0018268
0.8	0.8	0.64	100	0.81115	0.0018137
0.8	1	0.8	100	0.79972	0.0017548
0.8	1.2	0.96	100	0.79186	0.0017249
0.8	1.4	1.12	100	0.78631	0.0017503
0.9	0	0	100	0.99538	0.0028816
0.9	0.05	0.045	100	0.98894	0.0029849
0.9	0.1	0.09	100	0.97317	0.002428
0.9	0.15	0.135	100	0.95161	0.002488
0.9	0.2	0.18	100	0.92962	0.0022145
0.9	0.3	0.27	100	0.88985	0.0019886
0.9	0.4	0.36	100	0.86089	0.0019771
0.9	0.6	0.54	100	0.82565	0.001856
0.9	0.8	0.72	100	0.80646	0.0017625
0.9	1	0.9	100	0.79506	0.0017475
0.9	1.2	1.08	100	0.78817	0.0017674
0.9	1.4	1.26	100	0.78309	0.0017528
1	0	0	100	1.0442	0.0047054
1	0.05	0.05	100	1.0314	0.0034844
1	0.1	0.1	100	1	0
1	0.15	0.15	100	0.96507	0.0024365
1	0.2	0.2	100	0.93351	0.002156
1	0.3	0.3	100	0.88502	0.0020007
1	0.4	0.4	100	0.85378	0.0019071
1	0.6	0.6	100	0.81849	0.0018223
1	0.8	0.8	100	0.80113	0.0018015
1	1	1	100	0.79125	0.0017856
1	1.2	1.2	100	0.78449	0.0017141
1	1.4	1.4	100	0.77984	0.0017201
