# Supplementary material for: Fitness effects of altering gene expression noise in Saccharomyces cerevisiae
Source: eLife. 2018 Aug 20;7:e37272. doi: 10.7554/eLife.37272 (PMC6133559; doi:10.7554/eLife.37272)
Supplement: Source data 1. — Fluorescence levels and competitive fitness were measured by flow cytometry and analyzed using the R script provided in Supplementary file 3. Data used to make Figure 1D, Figure 2C and Figure 3. [file elife-37272-data1.xls]

## Sheet: Legend
Figure 1-3 - Source Data 1
Expression and fitness data for the final set of 43 TDH3 promoter alleles.
Fluorescence levels and competitive fitness were measured by flow cytometry and analyzed using the R script provided in Supplementary File 3.
These data were used to make Figure 1D, Figure 2C and all panels of Figure 3.
Headers	Description
VARIANT.ID	Unique name for each PTDH3 allele.
NICKNAME	Arbitrary name referring to the mutation(s) carried by the PTDH3 allele.
#COPY	Expected number of copies of the PTDH3-YFP-TCYC1 construct (Expression) or TDH3 gene (Fitness).
AUXOTROPHY	Presence or absence of a URA3 deletion in the strain.
CONSTRUCT.1	PTDH3 allele present in the left copy of PTDH3-YFP-TCYC1 or at the native TDH3 locus (Fitness).
CONSTRUCT.2	PTDH3 allele present in the right copy of PTDH3-YFP-TCYC1 or at the native TDH3 locus (Fitness).
MUTATION.TYPE	Type of mutation(s) in PTDH3.
PROMOTER.GENOTYPE	Short description of the PTDH3 alleles. Positions in PTDH3 are expressed relative to the start codon. Nucleotides written in capital letters correspond to WT alleles and lowercase letters correspond to mutant allele. Multiple mutations in the same TDH3 promoter are separated by ";". Different copies of the PTDH3-YFP-TCYC1 construct are separated by "_".
STRAIN	Name of yeast strain carrying the corresponding PTDH3 allele(s) at HO (Expression) or native TDH3 locus (Fitness).
#CLONES	Number of independent clones with the same genotype, isolated from different colonies in the same transformation.
EXTRA.MUTATION	Identity of additional mutations in PTDH3. Position is expressed relative to start codon.
#PYRO.COPIES	Number of copies of PTDH3-YFP-TCYC1 (Expression) or PTDH3-TDH3 (Fitness) constructs quantified by pyrosequencing.
mRNA	Indicate if the allele was included in the assay to determine the relationship between fluorescence intensity and YFP mRNA level.
PROTEIN.FUSION	If constructed, name of the strain expressing the TDH3-YFP gene fusion under control of the corresponding PTDH3 allele.
N.REP	Number of replicate populations of the same strain analyzed by flow cytometry.
YFP.MEDIAN.ADJUST.MEAN	Mean of the median fluorescence level across all replicate populations. Fluorescence levels were transformed to scale linearly with YFP mRNA levels and the median fluorescence level of the non-fluorescent strain YPW978 was subtracted from all samples.
YFP.SD.ADJUST.MEAN	Standard deviation of fluorescence levels among cells averaged across all replicate populations. Fluorescence levels were transformed to scale linearly with YFP mRNA levels and the standard deviation of fluorescence of the non-fluorescent strain YPW978 was subtracted from all samples.
YFP.SD.SCALED.MEAN	Standard deviation of fluorescence levels divided by the median fluorescence level of the reference strain averaged across all replicate populations. Fluorescence levels were transformed to scale linearly with YFP mRNA levels.
YFP.CV.MEAN	Standard deviation divided by the median fluorescence levels among cells averaged across all replicate populations. Fluorescence levels were transformed to scale linearly with YFP mRNA levels. The standard deviation and median of fluorescence of the non-fluorescent strain YPW978 was subtracted from all samples.
YFP.FANO.MEAN	Variance divided by the median fluorescence levels among cells averaged across all replicate populations. Fluorescence levels were transformed to scale linearly with YFP mRNA levels. The variance and median of fluorescence of the non-fluorescent strain YPW978 was subtracted from all samples.
YFP.LOG.CV.MEAN	Logarithm of YFP.CV.MEAN averaged across replicate populations.
YFP.MEDIAN.RELATIVE.MEAN	Same as YFP.MEDIAN.ADJUST.MEAN, but the median fluorescence levels of each replicate population was first divided by the median fluorescence levels of the reference strain averaged across replicates.
YFP.SD.RELATIVE.MEAN	Same as YFP.SD.ADJUST.MEAN, but the standard deviation of fluorescence levels of each replicate population was first divided by the standard deviation of fluorescence levels of the reference strain averaged across replicates.
YFP.CV.RELATIVE.MEAN	Same as YFP.CV.MEAN, but calculated relative to the standard deviation divided by the median fluorescence levels of the reference strain averaged across replicates.
YFP.FANO.RELATIVE.MEAN	Same as YFP.FANO.MEAN, but calculated relative to the variance divided by the median fluorescence levels of the reference strain averaged across replicates.
YFP.LOG.CV.RELATIVE.MEAN	Same as YFP.LOG.CV.MEAN, but calculated relative to the logarithm of the standard deviation divided by the median fluorescence levels of the reference strain averaged across replicates.
YFP.MEDIAN.ADJUST.SD	Standard deviation of the median fluorescence level across all replicate populations. Fluorescence levels were transformed to scale linearly with YFP mRNA levels and the median fluorescence level of the non-fluorescent strain YPW978 was subtracted from all samples.
YFP.SD.ADJUST.SD	Similar to YFP.SD.ADJUST.MEAN, but this is the standard deviation across replicate populations instead of the mean.
YFP.SD.SCALED.SD	Similar to YFP.SD.SCALED.MEAN, but this is the standard deviation across replicate populations instead of the mean.
YFP.CV.SD	Similar to YFP.CV.MEAN, but this is the standard deviation across replicate populations instead of the mean.
YFP.FANO.SD	Similar to YFP.FANO.MEAN, but this is the standard deviation across replicate populations instead of the mean.
YFP.LOG.CV.SD	Similar to YFP.LOG.CV.MEAN, but this is the standard deviation across replicate populations instead of the mean.
YFP.MEDIAN.RELATIVE.SD	Similar to YFP.MEDIAN.RELATIVE.MEAN, but this is the standard deviation across replicate populations instead of the mean.
YFP.SD.RELATIVE.SD	Similar to YFP.SD.RELATIVE.MEAN, but this is the standard deviation across replicate populations instead of the mean.
YFP.CV.RELATIVE.SD	Similar to YFP.CV.RELATIVE.MEAN, but this is the standard deviation across replicate populations instead of the mean.
YFP.FANO.RELATIVE.SD	Similar to YFP.FANO.RELATIVE.MEAN, but this is the standard deviation across replicate populations instead of the mean.
YFP.LOG.CV.RELATIVE.SD	Similar to YFP.LOG.CV.RELATIVE.MEAN, but this is the standard deviation across replicate populations instead of the mean.
DELTA.SD	Value of ΔNoise for each PTDH3 allele calculated as the residual of a LOESS regression of the standard deviation of expression on the median expression levels among all alleles (except Var36 and Var42).
SD.CLASS	Indicate whether a PTDH3 allele belongs to the class with "HIGH" (positive) or "LOW" (negative) DELTA.SD (ΔNoise). "UNCLEAR" is assigned when the ΔNoise value is comprised between -0.01 and 0.01.
DELTA.CV	Value of ΔNoise for each PTDH3 allele calculated as the residual of a LOESS regression of the standard deviation divided by the median expression on the median expression levels among all alleles (except Var0, Var36 and Var42).
CV.CLASS	Indicate whether a PTDH3 allele belongs to the class with "HIGH" (positive) or "LOW" (negative) DELTA.CV (ΔNoise). "UNCLEAR" is assigned when the ΔNoise value is comprised between -0.01 and 0.01.
DELTA.FANO	Value of ΔNoise for each PTDH3 allele calculated as the residual of a LOESS regression of the variance divided by the median expression on the median expression levels among all alleles (except Var0, Var36 and Var42).
FANO.CLASS	Indicate whether a PTDH3 allele belongs to the class with "HIGH" (positive) or "LOW" (negative) DELTA.FANO (ΔNoise). "UNCLEAR" is assigned when the ΔNoise value is comprised between -0.01 and 0.01.
DELTA.LOG.CV	Value of ΔNoise for each PTDH3 allele calculated as the residual of a LOESS regression of the logarithm of the standard deviation divided by the median expression on the median expression levels among all alleles (except Var0, Var36 and Var42).
LOG.CV.CLASS	Indicate whether a PTDH3 allele belongs to the class with "HIGH" (positive) or "LOW" (negative) DELTA.LOG.CV (ΔNoise). "UNCLEAR" is assigned when the ΔNoise value is comprised between -0.01 and 0.01.
W.ESTIMATE_MEAN	Fitness expressed relative to the common competitor YPW1160 and averaged across replicate populations.
FITNESS_MEAN	Fitness expressed relative to the reference strain YPW1189 (if tested strain has ura3d0 deletion) or YPW2682 (if tested strain has a functional URA3 allele). Fitness is averaged across replicate populations.
W.ESTIMATE_SD	Standard deviation of fitness relative to the common competitor YPW1160 across replicate populations.
FITNESS_SD	Standard deviation of fitness relative to the reference strain across replicate populations.
POWER	Minimal difference in fitness that can be detected as significant in a t-test with a power of 0.95 and a p-value of 0.05. Calculated with the function power.t.test in R.
FITNESS_SE	Standard error of the mean fitness (FITNESS_MEAN) used to represent 95% confidence intervals on figures.
DELTA.FITNESS	Value of ΔFitness for each PTDH3 allele calculated as the residual of a LOESS regression of the relative fitness on the median expression levels among all alleles (except Var36 and Var42).

## Sheet: Data
TDH3 PROMOTER VARIANT								EXPRESSION																																					FITNESS
VARIANT.ID	NICKNAME	#COPY	AUXOTROPHY	CONSTRUCT.1	CONSTRUCT.2	MUTATION.TYPE	PROMOTER.GENOTYPE	STRAIN	#CLONES	EXTRA.MUTATION	#PYRO.COPIES	mRNA	PROTEIN.FUSION	N.REP	YFP.MEDIAN.ADJUST.MEAN	YFP.SD.ADJUST.MEAN	YFP.SD.SCALED.MEAN	YFP.CV.MEAN	YFP.FANO.MEAN	YFP.LOG.CV.MEAN	YFP.MEDIAN.RELATIVE.MEAN	YFP.SD.RELATIVE.MEAN	YFP.CV.RELATIVE.MEAN	YFP.FANO.RELATIVE.MEAN	YFP.LOG.CV.RELATIVE.MEAN	YFP.MEDIAN.ADJUST.SD	YFP.SD.ADJUST.SD	YFP.SD.SCALED.SD	YFP.CV.SD	YFP.FANO.SD	YFP.LOG.CV.SD	YFP.MEDIAN.RELATIVE.SD	YFP.SD.RELATIVE.SD	YFP.CV.RELATIVE.SD	YFP.FANO.RELATIVE.SD	YFP.LOG.CV.RELATIVE.SD	DELTA.SD	SD.CLASS	DELTA.CV	CV.CLASS	DELTA.FANO	FANO.CLASS	DELTA.LOG.CV	LOG.CV.CLASS	STRAIN	#CLONES	EXTRA.MUTATION	#PYRO.COPIES	N.REP
Var0	Null	None	ura3d0	Var36	None	Deletion	ΔPTDH3 (& CDS)	YPW978	2	None	NA	YES	NA	8	-2.77e-17	-1.35e-18	-1.49e-19	4.83089	0.0215372	1.47057	-7.36e-17	-1.7e-17	47.9401	2.12096	4.78144	0.000519576	0.00102774	0.00268993	5.92545	0.0330363	1.85128	0.0013599	0.0266939	58.8021	3.25338	1.85128	-0.031756	LOW	NA	NA	NA	NA	NA	NA	YPW1177	5	None	NA	6
Var1.1	WT	Single	ura3d0	Var1	None	WT	WT; TATAbox(-141TATATAAA)	YPW1002	2	None	NA	YES	YPW1964	28	0.382069	0.0385008	0.100769	0.100823	0.0101903	-3.3127	1	1	1.00053	1.00353	-0.00182874	0.00475647	0.00200834	0.00525648	0.00609076	0.00112241	0.0887575	0.0124492	0.0521635	0.0604426	0.110534	0.0887575	-0.147364	LOW	-0.131904	LOW	-0.337445	LOW	-0.181929	LOW	YPW1189	2	None	NA	27
Var2	m75	Single	ura3d0	Var2	None	TFBS	GCR1.1(C-485t)	YPW1898	2	None	NA	NO	YPW1984	4	0.136423	0.0212545	0.05563	0.155924	0.00869899	-2.68372	0.357064	0.552053	1.54733	0.856667	0.627147	0.00253901	0.00118157	0.00309255	0.0109495	0.00109591	0.10039	0.00664542	0.0306895	0.108659	0.107924	0.10039	0.162576	HIGH	0.632836	HIGH	0.277333	HIGH	0.725684	HIGH	YPW1200	2	None	NA	9
Var3	m76	Single	ura3d0	Var3	None	TFBS	GCR1.1(C-482t)	YPW1960	2	None	NA	NO	YPW1986	4	0.059126	0.0136542	0.0357375	0.231283	0.00828728	-2.11527	0.154752	0.354647	2.29517	0.816123	1.19561	0.00167238	0.000657083	0.0017198	0.0172423	0.0010104	0.107213	0.00437716	0.0170667	0.171107	0.0995029	0.107213	0.129464	HIGH	0.633964	HIGH	0.389533	HIGH	0.811794	HIGH	YPW1156	1	None	NA	9
Var4	m66	Single	ura3d0	Var4	None	TFBS	RAP1(G-505a)	YPW1897	3	None	NA	YES	YPW1927	4	0.222842	0.032375	0.0847359	0.145362	0.0123508	-2.78466	0.58325	0.84089	1.44252	1.21629	0.526211	0.00412851	0.00183566	0.00480452	0.00959767	0.00148481	0.0958807	0.0108057	0.0476785	0.0952439	0.146223	0.0958807	0.204411	HIGH	0.420604	HIGH	0.466364	HIGH	0.477725	HIGH	YPW1209	2	None	NA	9
Var5	m63	Single	ura3d0	Var5	None	TFBS	RAP1(G-510a)	YPW1896	2	None	NA	NO	YPW1923	3	0.274973	0.0339094	0.0887519	0.123345	0.0109478	-3.01943	0.719695	0.880743	1.22403	1.07812	0.291443	0.00432718	0.000171445	0.000448728	0.0024882	0.000272098	0.0292333	0.0113256	0.00445303	0.024692	0.0267959	0.0292333	0.082128	HIGH	0.151678	HIGH	0.189029	HIGH	0.170629	HIGH	YPW1188	2	None	NA	9
Var6	m89	Single	ura3d0	Var6	None	TFBS	GCR1.2(C-447t)	YPW1892	2	None	NA	NO	YPW1974	3	0.326385	0.0302134	0.0790784	0.0925892	0.00735347	-3.43624	0.854257	0.784747	0.918823	0.724162	-0.125366	0.00125126	0.00237539	0.00621718	0.00763906	0.00119568	0.117698	0.00327497	0.0616971	0.0758074	0.117749	0.117698	-0.170099	LOW	-0.17684	LOW	-0.358176	LOW	-0.270192	LOW	YPW1153	3	None	NA	8
Var7	m90	Single	ura3d0	Var7	None	TFBS	GCR1.2(C-444t)	YPW1901	2	None	NA	NO	YPW1976	4	0.295765	0.0290818	0.0761165	0.098383	0.00752187	-3.34907	0.774115	0.755354	0.976319	0.740746	-0.0381994	0.00329173	0.00211795	0.00554338	0.00804233	0.0011565	0.118134	0.00861553	0.0550106	0.0798093	0.113891	0.118134	-0.104906	LOW	-0.10251	LOW	-0.221571	LOW	-0.167785	LOW	YPW1215	2	None	NA	9
Var8	m91	Single	ura3d0	Var8	None	TFBS	GCR1.2(C-443t)	YPW1903	2	None	NA	NO	YPW1988	4	0.332459	0.0365008	0.0955345	0.110027	0.0105491	-3.18823	0.870155	0.948051	1.09187	1.03887	0.122647	0.0111036	0.0020168	0.00527862	0.00967922	0.00150489	0.12612	0.0290619	0.0523832	0.0960532	0.1482	0.12612	-0.0264933	LOW	-0.0074661	UNCLEAR	-0.069162	LOW	-0.0255553	LOW	YPW1217	2	None	NA	9
Var9	m76.m66	Single	ura3d0	Var9	None	TFBS	RAP1(G-505a); GCR1.1(C-482t)	YPW2455	2	None	NA	NO	NA	4	0.00147654	0.000997033	0.00260956	0.661746	0.00215287	-0.788927	0.00386459	0.0258964	6.56694	0.212013	2.52195	0.000272663	0.00062424	0.00163384	0.365326	0.00200698	0.890939	0.000713648	0.0162137	3.62537	0.197646	0.890939	-0.0117017	LOW	2.51584	HIGH	-0.0896754	LOW	0.778406	HIGH	YPW2854	3	None	NA	5
Var10	m76.m63	Single	ura3d0	Var10	None	TFBS	RAP1(G-510a); GCR1.1(C-482t)	YPW2458	2	None	NA	NO	NA	4	0.00293857	0.00196046	0.00513117	0.677852	0.00410738	-0.690079	0.00769119	0.05092	6.72677	0.404491	2.62079	0.000278917	0.000943521	0.0024695	0.343015	0.00408268	0.695188	0.000730018	0.0245065	3.40396	0.402058	0.695188	0.00758717	UNCLEAR	2.75704	HIGH	0.0994214	HIGH	0.922344	HIGH	YPW2855	3	None	NA	6
Var11	m75.m63	Single	ura3d0	Var11	None	TFBS	RAP1(G-510a); GCR1.1(C-485t)	YPW2465	2	del431A	NA	NO	NA	4	0.00494244	0.00342396	0.00896161	0.693496	0.00624838	-0.532845	0.012936	0.088932	6.88201	0.615334	2.77803	8.57e-05	0.000268772	0.000703464	0.0639233	0.00103318	0.137459	0.000224429	0.00698093	0.634353	0.101747	0.137459	0.0379139	HIGH	3.02159	HIGH	0.305696	HIGH	1.14034	HIGH	YPW2857	3	del431A	NA	5
Var12	m76.m90	Single	ura3d0	Var12	None	TFBS	GCR1.1(C-482t); GCR1.2(C-444t)	YPW2460	2	None	NA	NO	NA	4	0.0217173	0.00871395	0.0228073	0.402685	0.00946557	-1.33521	0.0568413	0.226332	3.9961	0.93216	1.97566	0.00053736	0.00165352	0.00432781	0.0868941	0.00402702	0.28992	0.00140645	0.0429477	0.862307	0.396576	0.28992	0.114964	HIGH	0.969017	HIGH	0.585273	HIGH	0.805582	HIGH	YPW2860	3	None	NA	4
Var13	m75.m90	Single	ura3d0	Var13	None	TFBS	GCR1.1(C-485t); GCR1.2(C-444t)	YPW2469	2	del431A	NA	NO	NA	4	0.0347444	0.00912702	0.0238884	0.26256	0.0063225	-1.93461	0.0909374	0.23706	2.60556	0.622634	1.37626	0.00093033	0.000997777	0.00261151	0.0264008	0.00132976	0.142333	0.00243498	0.0259157	0.261993	0.130953	0.142333	0.082803	HIGH	0.131115	HIGH	0.247573	HIGH	0.520452	HIGH	YPW2863	3	del431A	NA	6
Var14	m63.m90	Single	ura3d0	Var14	None	TFBS	RAP1(G-510a); GCR1.2(C-444t)	YPW2475	2	None	NA	YES	NA	3	0.043387	0.016656	0.0435941	0.383952	0.0167968	-1.38367	0.113558	0.432613	3.8102	1.65414	1.9272	0.000216898	0.00118725	0.00310741	0.0284265	0.00241755	0.107852	0.000567693	0.0308369	0.282095	0.238078	0.107852	0.25149	HIGH	1.66	HIGH	1.26052	HIGH	1.25705	HIGH	YPW2865	3	None	NA	4
Var15	m63.m89	Single	ura3d0	Var15	None	TFBS	RAP1(G-510a); GCR1.2(C-447t)	YPW2478	2	None	NA	NO	NA	3	0.0705412	0.0225397	0.0589938	0.319536	0.0188756	-1.64694	0.184629	0.585434	3.17097	1.85885	1.66393	0.000777941	0.00102324	0.00267815	0.0143961	0.00167191	0.0658847	0.00203613	0.0265771	0.142862	0.164648	0.0658847	0.329351	HIGH	1.80706	HIGH	1.40808	HIGH	1.45468	HIGH	YPW2868	3	None	NA	6
Var16	TATA.26	Single	ura3d0	Var16	None	TATA	TATAbox(-141TcTcgttt)	YPW2550	1	None	NA	NO	YPW3163	8	0.0736825	0.00332228	0.0086955	0.0452285	0.000403751	-4.48965	0.192851	0.0862912	0.448832	0.039761	-1.17878	0.00194956	0.000552475	0.00144601	0.00833879	0.000134578	0.281518	0.00510265	0.0143497	0.0827513	0.0132531	0.281518	-0.178239	LOW	-0.841473	LOW	-0.41771	LOW	-1.34502	LOW	YPW2879	4	None	NA	9
Var17	TATA.129	Single	ura3d0	Var17	None	TATA	TATAbox(-141TATATAgA)	YPW2651	1	ins432A	NA	NO	YPW3169	3	0.228651	0.0235578	0.0616585	0.103032	0.00635311	-3.27889	0.598455	0.611878	1.02245	0.625648	0.0319812	0.00278856	0.000324845	0.000850227	0.00108079	0.000134397	0.0151677	0.00729857	0.00843736	0.0107254	0.0132353	0.0151677	-0.0436681	LOW	-0.0113423	LOW	-0.135737	LOW	-0.0313229	LOW	YPW2894	4	ins432A	NA	7
Var18	TATA.135	Single	ura3d0	Var18	None	TATA	TATAbox(-141TATAcAAt)	YPW2656	1	None	NA	NO	NA	4	0.116275	0.00854416	0.0223629	0.0734959	0.00164867	-3.7686	0.30433	0.221922	0.729348	0.162359	-0.45773	0.00159928	0.000543366	0.00142217	0.004876	0.000209976	0.0965384	0.00418584	0.0141131	0.0483877	0.0206782	0.0965384	-0.130858	LOW	-0.152108	LOW	-0.378511	LOW	-0.355528	LOW	YPW2883	1	None	NA	9
Var19	TATA.22	Single	ura3d0	Var19	None	TATA	TATAbox(-141TATATAcA)	YPW2546	1	None	NA	NO	NA	4	0.191577	0.0213358	0.0558427	0.111448	0.00625124	-3.1692	0.501419	0.554164	1.10597	0.615616	0.141668	0.00277113	0.00153737	0.0040238	0.00923376	0.000980489	0.117984	0.00725296	0.0399308	0.0916326	0.0965576	0.117984	0.0197265	HIGH	0.138793	HIGH	-0.0779338	LOW	0.171963	HIGH	YPW2884	1	None	NA	9
Var20	TATA.2	Single	ura3d0	Var20	None	TATA	TATAbox(-141TAcATAAA)	YPW2528	1	None	NA	NO	NA	4	0.261155	0.0281838	0.0737663	0.107959	0.00797589	-3.21284	0.683528	0.732031	1.07134	0.785458	0.0980352	0.00397748	0.00119935	0.00313909	0.0054054	0.000719178	0.0734617	0.0104104	0.0311513	0.0536413	0.0708239	0.0734617	-0.0258043	LOW	-0.000630775	UNCLEAR	-0.0582946	LOW	-0.0175951	LOW	YPW2885	3	None	NA	9
Var21	TATA.42	Single	ura3d0	Var21	None	TATA	TATAbox(-141TATcTAAA)	YPW2566	1	None	NA	YES	NA	3	0.108423	0.00819204	0.0214413	0.0755559	0.0016201	-3.72635	0.283779	0.212776	0.74979	0.159546	-0.415477	0.00058917	9.01e-05	0.000235879	0.000654199	3.08e-05	0.0125178	0.00154205	0.00234078	0.00649205	0.00303455	0.0125178	-0.125925	LOW	-0.14388	LOW	-0.36652	LOW	-0.327822	LOW	YPW2889	2	None	NA	9
Var22	TATA.81	Single	ura3d0	Var22	None	TATA	TATAbox(-141TATAcAAA)	YPW2605	1	None	NA	NO	YPW3166	4	0.145498	0.0125184	0.0327647	0.0860453	0.00283113	-3.54186	0.380817	0.325146	0.853884	0.278807	-0.230989	0.000795972	0.000931079	0.00243694	0.00651682	0.000423843	0.109194	0.00208332	0.0241834	0.0646707	0.0417396	0.109194	-0.0825448	LOW	-0.0873613	LOW	-0.318539	LOW	-0.144689	LOW	YPW2891	3	None	NA	6
Var23	m75.TATA.42	Single	ura3d0	Var23	None	TFBS.TATA	GCR1.1(C-485t); TATAbox(-141TATcTAAA)	YPW2653	1	None	NA	NO	YPW3171	4	0.0489409	0.00417652	0.0109313	0.0855809	0.000947037	-3.55741	0.128094	0.108479	0.849276	0.0932632	-0.246542	0.00168079	0.000489396	0.00128091	0.0121786	0.000245089	0.203757	0.00439918	0.0127113	0.120857	0.0241361	0.203757	-0.0887142	LOW	-1.11508	LOW	-0.312046	LOW	-0.808611	LOW	YPW2888	1	None	NA	9
Var24	m75.m63.TATA.26	Single	ura3d0	Var24	None	TFBS.TATA	RAP1(G-510a); GCR1.1(C-485t); TATAbox(-141TcTcgttt)	YPW2812	1	del431A	NA	NO	NA	4	0.000467374	-0.000423468	-0.00110835	0.545518	0.00096692	-0.874301	0.00122327	-0.0109989	5.41354	0.0952213	2.43657	0.000569165	0.000836249	0.00218874	NA	NA	NA	0.00148969	0.0217203	NA	NA	NA	-0.0446064	LOW	1.30569	HIGH	-0.204132	LOW	0.661607	HIGH	YPW2925	2	del431A	NA	6
Var25	m76.m90.TATA.26	Single	ura3d0	Var25	None	TFBS.TATA	GCR1.1(C-482t); GCR1.2(C-444t); TATAbox(-141TcTcgttt)	YPW2814	3	None	NA	NO	NA	3	0.00547081	0.0010922	0.00285864	0.328467	0.00160969	-1.64217	0.0143189	0.0283682	3.2596	0.158521	1.6687	5.61e-05	0.00126384	0.00330789	0.102486	0.000955481	0.457664	0.000146906	0.0328264	1.01704	0.0940948	0.457664	-0.0246414	LOW	-0.572547	LOW	-0.152299	LOW	0.046803	HIGH	YPW2928	3	None	NA	6
Var26	m75.m90.TATA.26	Single	ura3d0	Var26	None	TFBS.TATA	GCR1.1(C-485t); GCR1.2(C-444t); TATAbox(-141TcTcgttt)	YPW2820	3	del431A	NA	NO	NA	4	0.00955607	0.00063501	0.00166203	0.102818	0.000337381	-3.63562	0.0250114	0.0164934	1.02034	0.033225	-0.324748	0.000459481	0.000856081	0.00224064	0.0678105	0.000293942	1.39545	0.00120261	0.0222354	0.672928	0.0289471	1.39545	-0.0518797	LOW	-2.59748	LOW	-0.286744	LOW	-1.82685	LOW	YPW2930	3	del431A	NA	5
Var27	m76.TATA.26	Single	ura3d0	Var27	None	TFBS.TATA	GCR1.1(C-482t); TATAbox(-141TcTcgttt)	YPW2816	3	None	NA	YES	NA	8	0.0166844	0.00190483	0.00498556	0.114632	0.000621678	-3.19139	0.0436686	0.049475	1.13757	0.0612222	0.119478	0.000423379	0.000590799	0.00154631	0.0371785	0.000381438	0.468255	0.00110812	0.0153451	0.368946	0.0375636	0.468255	-0.0445427	LOW	-2.12459	LOW	-0.274668	LOW	-1.18329	LOW	YPW2934	4	None	NA	6
Var28	m63.m89.TATA.26	Single	ura3d0	Var28	None	TFBS.TATA	RAP1(G-510a); GCR1.2(C-447t); TATAbox(-141TcTcgttt)	YPW2824	3	None	NA	NO	NA	4	0.0112645	0.00270844	0.00708887	0.24016	0.00177896	-2.0902	0.0294829	0.0703475	2.38326	0.17519	1.22067	0.000313553	0.000673139	0.00176183	0.0581888	0.000836537	0.353171	0.000820672	0.0174838	0.577446	0.0823813	0.353171	-0.0043181	UNCLEAR	-1.14705	LOW	-0.148621	LOW	-0.232485	LOW	YPW2939	2	None	NA	6
Var29	m75.TATA.26	Single	ura3d0	Var29	None	TFBS.TATA	GCR1.1(C-485t); TATAbox(-141TcTcgttt)	YPW2826	3	None	NA	NO	NA	4	0.036914	0.00223244	0.00584302	0.0605251	0.000366851	-4.07775	0.0966161	0.0579841	0.60063	0.0361271	-0.766875	0.000964527	0.000500388	0.00130968	0.013532	0.000146791	0.360757	0.00252448	0.0129968	0.134287	0.0144559	0.360757	-0.103225	LOW	-1.78848	LOW	-0.34363	LOW	-1.5741	LOW	YPW2940	1	del431A;ins187A	NA	6
Var30	m75.m63.TATA.22	Single	ura3d0	Var30	None	TFBS.TATA	RAP1(G-510a); GCR1.1(C-485t); TATAbox(-141TATATAcA)	YPW2828	3	del431A	NA	NO	NA	4	0.00139409	-5.61e-05	-0.000146797	0.446967	0.000711088	-1.16452	0.00364878	-0.00145676	4.43555	0.0700272	2.14635	0.000390372	0.000821625	0.00215046	0.0390948	0.000213475	0.126349	0.00102173	0.0213404	0.387963	0.0210228	0.126349	-0.0387295	LOW	0.379823	HIGH	-0.23147	LOW	0.400249	HIGH	YPW2941	2	del431A	NA	6
Var31	m76.m90.TATA.22	Single	ura3d0	Var31	None	TFBS.TATA	GCR1.1(C-482t); GCR1.2(C-444t); TATAbox(-141TATATAcA)	YPW2832	2	None	NA	NO	NA	4	0.00567531	0.00120414	0.00315162	0.213499	0.000734066	-2.31382	0.0148542	0.0312756	2.11869	0.0722901	0.997048	0.000295328	0.000411212	0.00107628	0.0770436	0.000430621	0.605434	0.000772971	0.0106806	0.764554	0.0424071	0.605434	-0.0225056	LOW	-1.70257	LOW	-0.238984	LOW	-0.618761	LOW	YPW2943	4	None	NA	6
Var32	m75.m90.TATA.22	Single	ura3d0	Var32	None	TFBS.TATA	GCR1.1(C-485t); GCR1.2(C-444t); TATAbox(-141TATATAcA)	YPW2834	3	del431A	NA	NO	NA	4	0.0103044	0.00141873	0.0037133	0.139444	0.000600452	-2.97549	0.02697	0.0368495	1.38379	0.0591319	0.335384	0.000395987	0.00063149	0.00165282	0.06677	0.000489388	0.72563	0.00103643	0.016402	0.662603	0.0481945	0.72563	-0.0342959	LOW	-2.19553	LOW	-0.26252	LOW	-1.14519	LOW	YPW3001	2	del431A	NA	6
Var33	m76.TATA.22	Single	ura3d0	Var33	None	TFBS.TATA	GCR1.1(C-482t); TATAbox(-141TATATAcA)	YPW2836	3	None	NA	NO	NA	3	0.019459	0.00349269	0.00914152	0.179483	0.00165273	-2.4835	0.0509307	0.0907173	1.78113	0.162759	0.827371	3.47e-05	0.000366587	0.000959479	0.0187316	0.000336274	0.154428	9.09e-05	0.00952154	0.185886	0.0331159	0.154428	-0.0129321	LOW	-1.34979	LOW	-0.179208	LOW	-0.401422	LOW	YPW2947	4	None	NA	6
Var34	m63.m89.TATA.22	Single	ura3d0	Var34	None	TFBS.TATA	RAP1(G-510a); GCR1.2(C-447t); TATAbox(-141TATATAcA)	YPW2840	3	None	NA	NO	NA	4	0.0227546	0.00660728	0.0172934	0.290497	0.00502662	-1.78413	0.0595562	0.171614	2.88279	0.495017	1.52674	0.000463697	0.000163822	0.000428775	0.0106972	0.000300924	0.0528456	0.00121365	0.00425502	0.106155	0.0296347	0.0528456	0.0567351	HIGH	-0.0974683	LOW	0.145876	HIGH	0.383183	HIGH	YPW2951	3	del431A	NA	6
Var35	m75.TATA.22	Single	ura3d0	Var35	None	TFBS.TATA	GCR1.1(C-485t); TATAbox(-141TATATAcA)	YPW2842	3	del431A	NA	NO	NA	4	0.0527092	0.00628648	0.0164538	0.119591	0.00199558	-3.07611	0.137957	0.163282	1.18678	0.196522	0.234767	0.0013308	0.000793751	0.00207751	0.017913	0.000541454	0.217909	0.00348314	0.0206165	0.177763	0.0533218	0.217909	-0.0444294	LOW	-0.660254	LOW	-0.216665	LOW	-0.258525	LOW	YPW2952	2	del431A	NA	6
Var1.2	WT(URA3)	Single	URA3	Var37	None	WT(URA3)	WT; TATAbox(-141TATATAAA)	YPW2675	2	None	NA	YES	NA	7	0.379809	0.0425633	0.111378	0.112095	0.0126371	-3.16565	0.993872	1.01941	1.02597	1.05864	0.0285561	0.00272143	0.00501578	0.0131251	0.0135473	0.00316215	0.165788	0.00712133	0.120131	0.123995	0.264901	0.165788	-0.18429	LOW	-0.168346	LOW	-0.413016	LOW	-0.232941	LOW	YPW2682	1	None	NA	8
Var36	WT_WT	Double	URA3	Var1	Var1	WT_WT	WT_WT	YPW2671	1	None	2	YES	NA	12	0.792456	0.115523	0.302296	0.145778	0.0168407	-2.77815	2.07367	2.76683	1.33978	3.70835	0.275973	0.0122878	0.00679857	0.0177903	0.0056444	0.00519767	0.054794	0.0321544	0.162829	0.0516617	0.435422	0.054794	NA	NA	NA	NA	NA	NA	NA	NA	YPW2679	3	None	2	8
Var37	TATA.26_TATA.26	Double	URA3	Var16	Var16	TATA_TATA	TATAbox(-141TcTcgttt)_TATAbox(-141TcTcgttt)	YPW3019	1	None	2	NO	NA	4	0.168795	0.0149864	0.0392158	0.0888537	0.00349366	-3.49484	0.441696	0.358932	0.813254	0.292673	-0.300641	0.00349749	0.000803186	0.00210175	0.00603025	0.000427961	0.0957729	0.0091521	0.0192367	0.0551932	0.0358514	0.0957729	-0.105905	LOW	-0.156337	LOW	-0.354628	LOW	-0.240846	LOW	YPW3043	2	del54T_del54T	2	8
Var38	m63.m90_TATA.26	Double	URA3	Var14	Var16	TFBS_TATA	RAP1(G-510a); GCR1.2(C-444t)_TATAbox(-141TcTcgttt)	YPW3021	2	None	2	NO	NA	4	0.213786	0.0265288	0.0694196	0.124118	0.00861906	-3.01062	0.559427	0.635379	1.13601	0.72204	0.183584	0.00274586	0.000474693	0.00124216	0.00334761	0.000378021	0.0391896	0.00718527	0.0113692	0.0306397	0.0316678	0.0391896	0.0288797	HIGH	0.132959	HIGH	-0.0109907	LOW	0.159298	HIGH	YPW3045	2	None_del54T	2	4
Var39	m63.m89_m63.m89	Double	URA3	Var15	Var15	TFBS_TFBS	RAP1(G-510a); GCR1.2(C-447t)_RAP1(G-510a); GCR1.2(C-447t)	YPW3022	3	None	2	NO	NA	4	0.343801	0.0597962	0.156472	0.174016	0.0272495	-2.52362	0.899645	1.43215	1.59272	2.28276	0.670578	0.00668136	0.00159721	0.00417951	0.00716252	0.00182515	0.0593073	0.0174835	0.0382539	0.0655566	0.152898	0.0593073	0.419953	HIGH	0.486799	HIGH	1.1253	HIGH	0.515786	HIGH	YPW3047	1	None	2	8
Var40	m63.m89_TATA.42	Double	URA3	Var15	Var21	TFBS_TATA	RAP1(G-510a); GCR1.2(C-447t)_TATAbox(-141TATcTAAA)	YPW3010	1	None	3	NO	NA	3	0.469033	0.0637629	0.166853	0.136004	0.0227212	-2.87949	1.22735	1.52716	1.2448	1.90341	0.314709	0.00603985	0.0023958	0.00626925	0.00686701	0.00201418	0.0721286	0.0158049	0.0573807	0.0628519	0.168733	0.0721286	0.0409178	HIGH	0.0168438	HIGH	0.0642613	HIGH	0.0606047	HIGH	YPW3051	2	None	3	3
Var41	m75_m75	Double	URA3	Var2	Var2	TFBS_TFBS	GCR1.1(C-485t)_GCR1.1(C-485t)	YPW3028	2	del431A_del431A	2	NO	NA	3	0.441284	0.0629486	0.164722	0.142614	0.0235088	-2.81017	1.15474	1.50765	1.30531	1.96939	0.384033	0.00697051	0.00259124	0.00678066	0.00388419	0.00158363	0.0395644	0.0182402	0.0620616	0.0355509	0.132665	0.0395644	0.134635	HIGH	0.113017	HIGH	0.301634	HIGH	0.156169	HIGH	YPW3055	3	None	2	7
Var42	m66_m66	Double	URA3	Var4	Var4	TFBS_TFBS	RAP1(G-505a)_RAP1(G-505a)	YPW3034	2	None_A189g;C238t	2	NO	NA	4	0.669137	0.0860072	0.225061	0.128438	0.0289568	-2.96153	1.75097	2.05992	1.17556	2.42579	0.23267	0.0650262	0.00969009	0.0253567	0.00456917	0.00399018	0.050606	0.170158	0.232083	0.0418204	0.334267	0.050606	NA	NA	NA	NA	NA	NA	NA	NA	YPW3059	2	None	2	6
Var43	m66_TATA.129	Double	URA3	Var4	Var17	TFBS_TATA	RAP1(G-505a)_TATAbox(-141TATATAgA)	YPW3040	5	None_ins432A	2	NO	NA	4	0.405123	0.0463989	0.121415	0.114521	0.0139094	-3.12651	1.06011	1.11128	1.04818	1.16523	0.067696	0.00433238	0.00121275	0.00317348	0.00216592	0.000614553	0.0273666	0.0113368	0.029046	0.0198241	0.0514826	0.0273666	-0.121241	LOW	-0.104835	LOW	-0.29643	LOW	-0.129671	LOW	YPW3064	1	None_ins432AA	2	4
[truncated: 7 more columns]
