# Supplementary material for: Fitness effects of altering gene expression noise in Saccharomyces cerevisiae
Source: eLife journal article supplement (doi:10.7554/elife.37272), 2018-08-20
Supplement: supp [file elife_poa_e37272_Figure_1_figure_supplement_1_source_data_1.xls]

## Sheet: Legend
Figure 1 - figure supplement 1 - Source Data 1
Expression data for an initial set of 171 TDH3 promoter alleles.
Fluorescence levels were measured by flow cytometry and analyzed using the R script provided in Supplementary File 3.
These data were used to make Figure 1 - figure supplement 1.
Headers	Description
VARIANT.ID	Name of PTDH3 alleles that were included in the final set described in Figure 1-3 - Source Data 1. Alleles not included in the final set are named "NA".
STRAIN	Name of yeast strain carrying the corresponding PTDH3-YFP allele at HO locus.
#CLONES	Number of independent clones with the same genotype, isolated from different colonies in the same transformation.
NICKNAME	Arbitrary name referring to the mutation(s) carried by the PTDH3 allele.
#COPY	Number of copies of the PTDH3-YFP-TCYC1 construct.
AUXOTROPHY	Presence or absence of a URA3 deletion in the strain.
TYPE	Type of mutation(s) in PTDH3.
TATA.SEQUENCE	Sequence of the TATA box in PTDH3. The wild type sequence is TATATAAA. When two copies of PTDH3 are present, the two TATA box sequences are separated by "_".
GENOTYPE	Short description of the PTDH3 alleles. Positions in PTDH3 are expressed relative to the start codon. Nucleotides written in capital letters correspond to WT alleles and lowercase letters correspond to mutant allele. Multiple mutations in the same TDH3 promoter are separated by ";". Different copies of the PTDH3-YFP-TCYC1 construct are separated by "_".
N.REP	Number of replicate populations of the same strain analyzed by flow cytometry.
YFP.MEDIAN.ADJUST.MEAN	Mean of the median fluorescence level across all replicate populations. Fluorescence levels were transformed to scale linearly with YFP mRNA levels and the median fluorescence level of the non-fluorescent strain YPW978 was subtracted from all samples.
YFP.SD.ADJUST.MEAN	Standard deviation of fluorescence levels among cells averaged across all replicate populations. Fluorescence levels were transformed to scale linearly with YFP mRNA levels and the standard deviation of fluorescence of the non-fluorescent strain YPW978 was subtracted from all samples.
YFP.SD.SCALED.MEAN	Standard deviation of fluorescence levels divided by the median fluorescence level of the reference strain averaged across all replicate populations. Fluorescence levels were transformed to scale linearly with YFP mRNA levels.
YFP.CV.MEAN	Standard deviation divided by the median fluorescence levels among cells averaged across all replicate populations. Fluorescence levels were transformed to scale linearly with YFP mRNA levels. The standard deviation and median of fluorescence of the non-fluorescent strain YPW978 was subtracted from all samples.
YFP.FANO.MEAN	Variance divided by the median fluorescence levels among cells averaged across all replicate populations. Fluorescence levels were transformed to scale linearly with YFP mRNA levels. The variance and median of fluorescence of the non-fluorescent strain YPW978 was subtracted from all samples.
YFP.LOG.CV.MEAN	Logarithm of YFP.CV.MEAN averaged across replicate populations.
YFP.MEDIAN.RELATIVE.MEAN	Same as YFP.MEDIAN.ADJUST.MEAN, but the median fluorescence levels of each replicate population was first divided by the median fluorescence levels of the reference strain averaged across replicates.
YFP.SD.RELATIVE.MEAN	Same as YFP.SD.ADJUST.MEAN, but the standard deviation of fluorescence levels of each replicate population was first divided by the standard deviation of fluorescence levels of the reference strain averaged across replicates.
YFP.CV.RELATIVE.MEAN	Same as YFP.CV.MEAN, but calculated relative to the standard deviation divided by the median fluorescence levels of the reference strain averaged across replicates.
YFP.FANO.RELATIVE.MEAN	Same as YFP.FANO.MEAN, but calculated relative to the variance divided by the median fluorescence levels of the reference strain averaged across replicates.
YFP.LOG.CV.RELATIVE.MEAN	Same as YFP.LOG.CV.MEAN, but calculated relative to the logarithm of the standard deviation divided by the median fluorescence levels of the reference strain averaged across replicates.
YFP.MEDIAN.ADJUST.SD	Standard deviation of the median fluorescence level across all replicate populations. Fluorescence levels were transformed to scale linearly with YFP mRNA levels and the median fluorescence level of the non-fluorescent strain YPW978 was subtracted from all samples.
YFP.SD.ADJUST.SD	Similar to YFP.SD.ADJUST.MEAN, but this is the standard deviation across replicate populations instead of the mean.
YFP.SD.SCALED.SD	Similar to YFP.SD.SCALED.MEAN, but this is the standard deviation across replicate populations instead of the mean.
YFP.CV.SD	Similar to YFP.CV.MEAN, but this is the standard deviation across replicate populations instead of the mean.
YFP.FANO.SD	Similar to YFP.FANO.MEAN, but this is the standard deviation across replicate populations instead of the mean.
YFP.LOG.CV.SD	Similar to YFP.LOG.CV.MEAN, but this is the standard deviation across replicate populations instead of the mean.
YFP.MEDIAN.RELATIVE.SD	Similar to YFP.MEDIAN.RELATIVE.MEAN, but this is the standard deviation across replicate populations instead of the mean.
YFP.SD.RELATIVE.SD	Similar to YFP.SD.RELATIVE.MEAN, but this is the standard deviation across replicate populations instead of the mean.
YFP.CV.RELATIVE.SD	Similar to YFP.CV.RELATIVE.MEAN, but this is the standard deviation across replicate populations instead of the mean.
YFP.FANO.RELATIVE.SD	Similar to YFP.FANO.RELATIVE.MEAN, but this is the standard deviation across replicate populations instead of the mean.
YFP.LOG.CV.RELATIVE.SD	Similar to YFP.LOG.CV.RELATIVE.MEAN, but this is the standard deviation across replicate populations instead of the mean.

## Sheet: Data
VARIANT.ID	STRAIN	#CLONES	NICKNAME	#COPY	AUXOTROPHY	TYPE	TATA.SEQUENCE	GENOTYPE	N.REP	YFP.MEDIAN.ADJUST.MEAN	YFP.SD.ADJUST.MEAN	YFP.SD.SCALED.MEAN	YFP.CV.MEAN	YFP.FANO.MEAN	YFP.LOG.CV.MEAN	YFP.MEDIAN.RELATIVE.MEAN	YFP.SD.RELATIVE.MEAN	YFP.CV.RELATIVE.MEAN	YFP.FANO.RELATIVE.MEAN	YFP.LOG.CV.RELATIVE.MEAN	YFP.MEDIAN.ADJUST.SD	YFP.SD.ADJUST.SD	YFP.SD.SCALED.SD	YFP.CV.SD	YFP.FANO.SD	YFP.LOG.CV.SD	YFP.MEDIAN.RELATIVE.SD	YFP.SD.RELATIVE.SD	YFP.CV.RELATIVE.SD	YFP.FANO.RELATIVE.SD	YFP.LOG.CV.RELATIVE.SD
NA	YPW2365	2	GCN4_1	Single	ura3d0	GCN4	TATATAAA	T-494G; T-492C; C-489A	12	0.592207	0.067263	0.110231	0.113591	0.012542	-3.13931	0.970513	0.994278	1.02459	1.02041	0.0338037	0.00691437	0.00288471	0.00472749	0.00496187	0.00109472	0.0620705	0.0113313	0.0426417	0.0447558	0.0890658	0.0620705
NA	YPW2383	2	GCN4_10	Single	ura3d0	GCN4	TATATAAA	T-118C; G-116C; T-115A	12	0.619193	0.0663942	0.108807	0.107247	0.0116799	-3.22177	1.01474	0.981435	0.967366	0.950267	-0.0486489	0.0100281	0.00214288	0.00351177	0.00370475	0.000764178	0.0495491	0.0164342	0.0316759	0.0334167	0.062173	0.0495491
NA	YPW2367	2	GCN4_2	Single	ura3d0	GCN4	TATATAAA	T-406G; C-405A; T-404C	11	0.600848	0.0664744	0.108939	0.110585	0.0120688	-3.17776	0.984674	0.982621	0.997468	0.981909	-0.00464371	0.0107661	0.00352096	0.00577017	0.004282	0.00109669	0.0560143	0.0176436	0.0520466	0.0386234	0.0892263	0.0560143
NA	YPW2369	2	GCN4_3	Single	ura3d0	GCN4	TATATAAA	A-370G; G-369A; G-367T	10	0.594145	0.0674922	0.110607	0.113605	0.0125733	-3.1384	0.973689	0.997666	1.02471	1.02295	0.0347162	0.00650616	0.00179722	0.0029453	0.00317862	0.000678582	0.040129	0.0106623	0.0265664	0.0286709	0.055209	0.040129
NA	YPW2371	2	GCN4_4	Single	ura3d0	GCN4	TATATAAA	A-323T; A-322G; C-321A	10	0.608489	0.0676176	0.110812	0.111114	0.0123251	-3.17056	0.997195	0.99952	1.00224	1.00276	0.00256323	0.00637037	0.00246721	0.00404328	0.00353405	0.000829894	0.0461527	0.0104398	0.0364701	0.0318769	0.0675196	0.0461527
NA	YPW2373	2	GCN4_5.6	Single	ura3d0	GCN4	TATATAAA	G-293A; A-280T; C-266T	12	0.537922	0.0628674	0.103027	0.116898	0.0120599	-3.0978	0.881551	0.929302	1.05441	0.981187	0.0753214	0.0112623	0.00255735	0.004191	0.00484352	0.000975167	0.0589474	0.0184568	0.0378026	0.0436882	0.0793389	0.0589474
NA	YPW2375	2	GCN4_5.6.7	Single	ura3d0	GCN4	TATATAAA	A-280T; C-266T; A-252G; T-251A	10	0.326118	0.0579853	0.0950266	0.178075	0.0169148	-2.49025	0.534444	0.857135	1.60622	1.37618	0.682867	0.0285504	0.00435521	0.00713734	0.00628018	0.00131183	0.0508298	0.0467886	0.0643784	0.0566469	0.106729	0.0508298
NA	YPW2377	2	GCN4_6.7	Single	ura3d0	GCN4	TATATAAA	C-266T; A-252G; T-251A	12	0.575211	0.06781	0.111127	0.117832	0.0131266	-3.08662	0.94266	1.00236	1.06284	1.06797	0.0864999	0.0164413	0.00432812	0.00709295	0.00548989	0.00142625	0.0667949	0.0269442	0.063978	0.0495185	0.116039	0.0667949
NA	YPW2379	2	GCN4_8	Single	ura3d0	GCN4	TATATAAA	A-181C; A-180T; C-178A	12	0.579846	0.0647041	0.106038	0.111593	0.0118456	-3.16447	0.950255	0.956452	1.00656	0.96375	0.00864766	0.00539576	0.00224038	0.00367155	0.00387083	0.000817313	0.0497625	0.00884261	0.0331171	0.0349147	0.0664961	0.0497625
NA	YPW2381	2	GCN4_9	Single	ura3d0	GCN4	TATATAAA	A-147C	12	0.594992	0.0668226	0.109509	0.112316	0.0123171	-3.15542	0.975077	0.987768	1.01309	1.00211	0.0176978	0.00658898	0.00266244	0.00436323	0.00453569	0.000990488	0.0574378	0.0107981	0.0393561	0.0409117	0.0805855	0.0574378
NA	YPW1931	1	m123	Single	ura3d0	NOT.TFBS	TATATAAA	G-358a	12	0.595049	0.065476	0.107303	0.110039	0.0118165	-3.1845	0.97517	0.967863	0.992546	0.961381	-0.0113781	0.00936096	0.00210791	0.00345445	0.00326975	0.000703031	0.0429169	0.0153408	0.0311589	0.0294929	0.0571982	0.0429169
NA	YPW1932	1	m131	Single	ura3d0	NOT.TFBS	TATATAAA	C-345t	11	0.597445	0.067677	0.110909	0.113304	0.0125825	-3.14281	0.979097	1.0004	1.022	1.0237	0.030312	0.00613661	0.00238197	0.00390359	0.00461996	0.000956979	0.0583307	0.0100567	0.0352102	0.0416717	0.0778592	0.0583307
NA	YPW1949	1	m142	Single	ura3d0	NOT.TFBS	TATATAAA	C-321t	12	0.601669	0.0660066	0.108172	0.109699	0.0118859	-3.18951	0.986019	0.975705	0.989482	0.967032	-0.0163928	0.00910079	0.00299633	0.00491041	0.00458212	0.00102488	0.0596757	0.0149144	0.0442916	0.0413305	0.0833837	0.0596757
NA	YPW1996	1	m153	Single	ura3d0	NOT.TFBS	TATATAAA	C-297t	12	0.658564	0.0692299	0.113454	0.105127	0.0119472	-3.25101	1.07926	1.02335	0.948239	0.972018	-0.077894	0.0104087	0.00312223	0.00511673	0.0045573	0.00105796	0.0615994	0.0170579	0.0461526	0.0411066	0.0860746	0.0615994
NA	YPW1998	1	m154	Single	ura3d0	NOT.TFBS	TATATAAA	G-295a	12	0.635735	0.0666853	0.109284	0.104902	0.0114687	-3.25323	1.04185	0.985739	0.946208	0.933088	-0.0801108	0.00662199	0.00144434	0.002367	0.00237381	0.000489953	0.0327531	0.0108522	0.0213502	0.0214117	0.0398623	0.0327531
NA	YPW1991	1	m156	Single	ura3d0	NOT.TFBS	TATATAAA	G-293a	6	0.649299	0.0658273	0.107878	0.101383	0.0109449	-3.30264	1.06408	0.973055	0.914472	0.89047	-0.129522	0.00548329	0.00199216	0.00326476	0.0030005	0.000642568	0.0430793	0.00898605	0.0294479	0.0270643	0.0522789	0.0430793
NA	YPW1954	1	m160	Single	ura3d0	NOT.TFBS	TATATAAA	C-281t	17	0.588324	0.0642859	0.105352	0.109268	0.0115158	-3.19431	0.96415	0.950271	0.985591	0.936918	-0.0211889	0.00701891	0.00149787	0.00245472	0.00210034	0.000473353	0.0277011	0.0115026	0.0221414	0.0189449	0.0385117	0.0277011
NA	YPW1956	1	m221	Single	ura3d0	NOT.TFBS	TATATAAA	C-102t	11	0.637374	0.0700937	0.11487	0.109962	0.0126484	-3.18581	1.04453	1.03612	0.991854	1.02907	-0.012687	0.0100229	0.00301152	0.0049353	0.00406414	0.0010082	0.0528946	0.0164256	0.0445161	0.0366583	0.0820262	0.0528946
Var5	YPW1896	1	m63	Single	ura3d0	SINGLE.TFBS	TATATAAA	RAP1(G-510a)	11	0.46867	0.0657616	0.107771	0.140269	0.0151321	-2.83421	0.768059	0.972084	1.26522	1.23114	0.338909	0.0130962	0.00315232	0.00516605	0.00381414	0.00111086	0.0387637	0.0214621	0.0465974	0.0344033	0.0903788	0.0387637
Var15	YPW2478	2	m63.m89	Single	ura3d0	DOUBLE.TFBS	TATATAAA	RAP1(G-510a); GCR1.2(C-447t)	11	0.18998	0.0556737	0.0912384	0.292897	0.0267887	-1.77289	0.311341	0.822965	2.64192	2.17951	1.40023	0.00881873	0.00417065	0.00683488	0.013352	0.00311868	0.065464	0.0144522	0.0616502	0.120434	0.253734	0.065464
Var14	YPW2475	2	m63.m90	Single	ura3d0	DOUBLE.TFBS	TATATAAA	RAP1(G-510a); GCR1.2(C-444t)	12	0.1229	0.0468666	0.0768053	0.383337	0.0294105	-1.38627	0.20141	0.69278	3.45768	2.39282	1.78685	0.0154443	0.00423949	0.00694771	0.0260756	0.00296686	0.0956874	0.0253102	0.0626679	0.235201	0.241382	0.0956874
Var4	YPW1897	1	m66	Single	ura3d0	SINGLE.TFBS	TATATAAA	RAP1(G-505a)	18	0.397612	0.0684023	0.112098	0.1721	0.0193414	-2.5408	0.65161	1.01112	1.55233	1.5736	0.632321	0.00924177	0.00362915	0.00594748	0.00961953	0.00206533	0.0803171	0.0151455	0.0536459	0.0867676	0.168034	0.0803171
NA	YPW2473	2	m66.m89	Single	ura3d0	DOUBLE.TFBS	TATATAAA	RAP1(G-505a); GCR1.2(C-447t)	11	0.0964774	0.0489149	0.080162	0.514092	0.0411714	-0.968872	0.158108	0.723057	4.63708	3.34968	2.20425	0.0154062	0.00413823	0.00678176	0.0588816	0.00561345	0.170543	0.0252478	0.061171	0.531108	0.456707	0.170543
NA	YPW2471	2	m66.m90	Single	ura3d0	DOUBLE.TFBS	TATATAAA	RAP1(G-505a); GCR1.2(C-444t)	12	0.0514384	0.0312923	0.051282	0.613259	0.0313398	-0.708942	0.0842976	0.462561	5.53156	2.54979	2.46418	0.00994562	0.00507739	0.00832085	0.0442532	0.00483378	0.105696	0.0162989	0.0750536	0.399162	0.393273	0.105696
Var2	YPW1898	1	m75	Single	ura3d0	SINGLE.TFBS	TATATAAA	GCR1.1(C-485t)	12	0.278116	0.0539412	0.0883992	0.194372	0.0171814	-2.36461	0.455778	0.797356	1.75322	1.39787	0.808506	0.0161896	0.00162727	0.00266678	0.00929197	0.000966338	0.0686616	0.0265316	0.0240542	0.083813	0.0786206	0.0686616
Var11	YPW2465	2	m75.m63	Single	ura3d0	DOUBLE.TFBS	TATATAAA	RAP1(G-510a); GCR1.1(C-485t)	11	0.0254366	0.0172569	0.0282807	0.68004	0.0192377	-0.558241	0.0416857	0.25509	6.13393	1.56517	2.61488	0.00279908	0.0017654	0.00289315	0.0366955	0.00232436	0.0785793	0.00458716	0.0260961	0.330992	0.189108	0.0785793
NA	YPW2463	2	m75.m66	Single	ura3d0	DOUBLE.TFBS	TATATAAA	RAP1(G-505a); GCR1.1(C-485t)	12	0.0147879	0.0110951	0.0181827	0.751265	0.0136947	-0.415398	0.0242346	0.164007	6.77637	1.11419	2.75772	0.00191016	0.00151699	0.00248605	0.0485146	0.00232978	0.0940577	0.00313038	0.022424	0.437599	0.18955	0.0940577
NA	YPW2467	2	m75.m89	Single	ura3d0	DOUBLE.TFBS	TATATAAA	GCR1.1(C-485t); GCR1.2(C-447t)	10	0.0998281	0.0269263	0.044127	0.269896	0.0119129	-1.89016	0.163599	0.398023	2.43445	0.969224	1.28295	0.0045359	0.00109698	0.00179774	0.00851302	0.000679957	0.0453234	0.00743347	0.0162155	0.0767869	0.0553209	0.0453234
Var13	YPW2469	2	m75.m90	Single	ura3d0	DOUBLE.TFBS	TATATAAA	GCR1.1(C-485t); GCR1.2(C-444t)	12	0.0752294	0.0279183	0.0457527	0.377034	0.0175255	-1.43007	0.123286	0.412686	3.40082	1.42587	1.74304	0.00801699	0.00310284	0.00508495	0.0740822	0.00527984	0.261184	0.0131383	0.045866	0.668218	0.429565	0.261184
Var3	YPW1960	1	m76	Single	ura3d0	SINGLE.TFBS	TATATAAA	GCR1.1(C-482t)	11	0.12629	0.0357536	0.0585932	0.283082	0.0166165	-1.82195	0.206964	0.528507	2.55338	1.35191	1.35117	0.00454188	0.0020799	0.00340855	0.012225	0.00158903	0.0628717	0.00744326	0.0307449	0.110269	0.129283	0.0628717
Var10	YPW2458	2	m76.m63	Single	ura3d0	DOUBLE.TFBS	TATATAAA	RAP1(G-510a); GCR1.1(C-482t)	12	0.0150223	0.0112669	0.0184643	0.752023	0.0139086	-0.414457	0.0246187	0.166547	6.78321	1.13159	2.75866	0.00301315	0.0022536	0.00369322	0.0543494	0.00307351	0.100927	0.00493797	0.0333127	0.490228	0.250059	0.100927
Var9	YPW2455	2	m76.m66	Single	ura3d0	DOUBLE.TFBS	TATATAAA	RAP1(G-505a); GCR1.1(C-482t)	12	0.00638939	0.00514069	0.00842459	0.80149	0.00688812	-0.329599	0.010471	0.0759894	7.22939	0.560413	2.84352	0.00119591	0.00128876	0.00211202	0.10282	0.00255248	0.17848	0.00195986	0.0190503	0.927434	0.207668	0.17848
NA	YPW2461	2	m76.m89	Single	ura3d0	DOUBLE.TFBS	TATATAAA	GCR1.1(C-482t); GCR1.2(C-447t)	12	0.0690887	0.0272551	0.0446658	0.399196	0.0179921	-1.33982	0.113223	0.402883	3.60073	1.46383	1.8333	0.00717983	0.00241316	0.0039547	0.0621521	0.00418627	0.213664	0.0117664	0.0356711	0.560609	0.340592	0.213664
Var12	YPW2460	2	m76.m90	Single	ura3d0	DOUBLE.TFBS	TATATAAA	GCR1.1(C-482t); GCR1.2(C-444t)	11	0.0516154	0.0245242	0.0401904	0.476654	0.019174	-1.07185	0.0845876	0.362515	4.29939	1.55998	2.10127	0.00394254	0.00132482	0.00217112	0.0323413	0.00192051	0.0940779	0.00646106	0.0195834	0.291716	0.156251	0.0940779
Var6	YPW1892	1	m89	Single	ura3d0	SINGLE.TFBS	TATATAAA	GCR1.2(C-447t)	12	0.522387	0.0632505	0.103655	0.121073	0.0125815	-3.04788	0.856091	0.934965	1.09207	1.02362	0.125243	0.00919852	0.00350924	0.00575096	0.0062977	0.00130955	0.0761836	0.0150746	0.0518734	0.0568049	0.106544	0.0761836
Var7	YPW1901	1	m90	Single	ura3d0	SINGLE.TFBS	TATATAAA	GCR1.2(C-444t)	11	0.48158	0.0588651	0.0964685	0.122246	0.0118095	-3.03322	0.789217	0.87014	1.10265	0.960817	0.139894	0.00867198	0.00247227	0.00405158	0.00499657	0.000962326	0.0584621	0.0142117	0.036545	0.0450688	0.0782942	0.0584621
Var8	YPW1903	1	m91	Single	ura3d0	SINGLE.TFBS	TATATAAA	GCR1.2(C-443t)	12	0.549235	0.0645625	0.105805	0.117545	0.012468	-3.09051	0.90009	0.954359	1.06025	1.01439	0.0826104	0.00883207	0.00357939	0.00586593	0.00607981	0.00131466	0.0752897	0.0144741	0.0529104	0.0548396	0.10696	0.0752897
Var1.1	YPW1002	2	REFERENCE	Single	ura3d0	REF	TATATAAA	WT	23	0.612457	0.0679742	0.111397	0.11097	0.012393	-3.17343	1.0037	1.00479	1.00094	1.00829	-0.000308359	0.00890285	0.00375184	0.00614855	0.00552654	0.0013248	0.0703469	0.01459	0.0554595	0.0498491	0.107785	0.0703469
NA	YPW2527	1	TATA.1	Single	ura3d0	TATA	CATAGAAT	TATAbox(-141CATAGAAT)	6	0.124228	0.0139257	0.030579	0.111785	0.00344266	-3.16419	0.272788	0.263456	0.963092	0.255543	-0.0572379	0.00632699	0.00170414	0.00374206	0.00794188	0.000678762	0.101221	0.0138932	0.0322401	0.068424	0.0503834	0.101221
Var20	YPW2528	1	TATA.2	Single	ura3d0	TATA	TACATAAA	TATAbox(-141TACATAAA)	5	0.325621	0.0386044	0.0847701	0.118555	0.0100512	-3.07646	0.71502	0.730344	1.02142	0.746085	0.0304916	0.00413497	0.000704458	0.00154689	0.00144904	0.000284114	0.0176322	0.00907984	0.0133274	0.0124843	0.0210893	0.0176322
NA	YPW2529	1	TATA.3	Single	ura3d0	TATA	TGTACAAG	TATAbox(-141TGTACAAG)	5	0.136352	0.0153809	0.0337743	0.112789	0.00381236	-3.14879	0.299411	0.290985	0.971745	0.282985	-0.0418409	0.00222118	0.000571648	0.00125526	0.00327427	0.000243734	0.042134	0.00487742	0.0108148	0.0282097	0.018092	0.042134
NA	YPW2530	1	TATA.5	Single	ura3d0	TATA	TATCTAAA	TATAbox(-141TATCTAAA)	6	0.153478	0.0169402	0.0371983	0.110242	0.00411812	-3.18342	0.337017	0.320485	0.949799	0.305682	-0.0764722	0.00520855	0.00149083	0.00327367	0.00660251	0.000604198	0.0867137	0.0114373	0.0282046	0.0568845	0.0448486	0.0867137
NA	YPW2531	1	TATA.7	Single	ura3d0	TATA	AATATAAA	TATAbox(-141AATATAAA)	6	0.337482	0.0432771	0.0950306	0.128122	0.0122193	-2.96633	0.741065	0.818745	1.10384	0.907016	0.14062	0.00688416	0.00330828	0.00726454	0.00727863	0.00164404	0.0811422	0.0151167	0.0625883	0.0627097	0.122034	0.0811422
NA	YPW2532	1	TATA.8	Single	ura3d0	TATA	TATAGATA	TATAbox(-141TATAGATA)	6	0.215919	0.0283614	0.0622778	0.131077	0.00820474	-2.9336	0.474128	0.53656	1.1293	0.609025	0.173346	0.00967694	0.0029462	0.00646946	0.00778642	0.0013547	0.0846238	0.0212492	0.0557382	0.0670846	0.100557	0.0846238
NA	YPW2533	1	TATA.9	Single	ura3d0	TATA	TATATTAA	TATAbox(-141TATATTAA)	6	0.34038	0.0413051	0.0907005	0.121338	0.0110195	-3.04376	0.747428	0.781438	1.0454	0.817959	0.0631908	0.00251766	0.00170159	0.00373645	0.00457195	0.00085429	0.0550556	0.00552844	0.0321917	0.0393901	0.0634125	0.0550556
NA	YPW2534	1	TATA.10	Single	ura3d0	TATA	TATATAAA	TATAbox(-141TATATAAA)	6	0.451756	0.0556226	0.12214	0.123037	0.0150526	-3.0235	0.991995	1.05231	1.06004	1.11733	0.0834483	0.01228	0.00334167	0.00733786	0.00411481	0.00140999	0.0481617	0.0269652	0.06322	0.0354515	0.104661	0.0481617
NA	YPW2535	1	TATA.11	Single	ura3d0	TATA	ACTATACA	TATAbox(-141ACTATACA)	6	0.12312	0.0134933	0.0296294	0.109483	0.00325612	-3.1932	0.270354	0.255275	0.943261	0.241696	-0.0862466	0.00296767	0.00107599	0.00236273	0.00626918	0.000444836	0.0827338	0.00651659	0.0203563	0.0540127	0.0330195	0.0827338
NA	YPW2536	1	TATA.12	Single	ura3d0	TATA	TATCTAAT	TATAbox(-141TATCTAAT)	6	0.134701	0.0150015	0.0329413	0.111315	0.00367243	-3.16803	0.295784	0.283809	0.959048	0.272599	-0.0610754	0.00438634	0.000877363	0.00192657	0.00393632	0.000332957	0.05098	0.0096318	0.0165985	0.0339137	0.0247149	0.05098
NA	YPW2537	1	TATA.13	Single	ura3d0	TATA	CATAGACA	TATAbox(-141CATAGACA)	6	0.123027	0.0135025	0.0296496	0.109711	0.00325546	-3.18853	0.270151	0.255449	0.945229	0.241648	-0.0815802	0.00335089	0.000618702	0.00135859	0.00248457	0.000214097	0.0332626	0.0073581	0.011705	0.021406	0.015892	0.0332626
NA	YPW2538	1	TATA.14	Single	ura3d0	TATA	TTTATAAA	TATAbox(-141TTTATAAA)	6	0.32955	0.0405427	0.0890263	0.122978	0.0109661	-3.02443	0.723647	0.767014	1.05953	0.813994	0.0825227	0.00649479	0.00214441	0.00470883	0.00475534	0.000989021	0.0560687	0.0142617	0.0405694	0.0409701	0.0734135	0.0560687
NA	YPW2539	1	TATA.15	Single	ura3d0	TATA	TTTACGCA	TATAbox(-141TTTACGCA)	6	0.114962	0.0128932	0.0283117	0.111822	0.00318946	-3.16386	0.25244	0.243922	0.963409	0.236748	-0.0569064	0.00588379	0.00159746	0.00350781	0.00813928	0.000635384	0.103581	0.01292	0.0302219	0.0701247	0.0471636	0.103581
NA	YPW2540	1	TATA.16	Single	ura3d0	TATA	TATGTGAA	TATAbox(-141TATGTGAA)	6	0.152725	0.0177185	0.0389075	0.115795	0.0045333	-3.11346	0.335364	0.335211	0.997638	0.3365	-0.00651436	0.00511204	0.0018486	0.00405927	0.00832628	0.000797008	0.103608	0.0112253	0.034973	0.0717359	0.0591606	0.103608
NA	YPW2541	1	TATA.17	Single	ura3d0	TATA	TATCTGAA	TATAbox(-141TATCTGAA)	6	0.141423	0.0159548	0.0350345	0.112767	0.00395662	-3.14936	0.310546	0.301843	0.971556	0.293694	-0.0424097	0.00338214	0.000851717	0.00187025	0.00404125	0.000343334	0.0520558	0.00742673	0.0161133	0.0348178	0.0254851	0.0520558
NA	YPW2542	1	TATA.18	Single	ura3d0	TATA	TATTTCCA	TATAbox(-141TATTTCCA)	6	0.137143	0.0159291	0.0349782	0.115995	0.00406972	-3.10912	0.301147	0.301358	0.999367	0.302088	-0.00217324	0.00518631	0.00129966	0.00285387	0.00530319	0.000513188	0.066096	0.0113884	0.0245878	0.0456901	0.0380932	0.066096
NA	YPW2543	1	TATA.19	Single	ura3d0	TATA	TATATCAA	TATAbox(-141TATATCAA)	5	0.266401	0.0328456	0.0721245	0.123271	0.00891819	-3.02221	0.584979	0.621395	1.06205	0.661983	0.0847423	0.0019574	0.0021083	0.00462954	0.00742183	0.0010977	0.0873577	0.00429819	0.0398863	0.0639435	0.0814806	0.0873577
NA	YPW2544	1	TATA.20	Single	ura3d0	TATA	AATATCAG	TATAbox(-141AATATCAG)	6	0.151699	0.0182414	0.0400556	0.120148	0.00483574	-3.05986	0.33311	0.345102	1.03514	0.35895	0.0470857	0.00256209	0.00154201	0.00338605	0.00825377	0.000760633	0.0967097	0.00562601	0.0291728	0.0711111	0.0564606	0.0967097
Var19	YPW2546	1	TATA.22	Single	ura3d0	TATA	TATATACA	TATAbox(-141TATATACA)	6	0.222845	0.024427	0.0536384	0.109559	0.00588927	-3.19139	0.489338	0.462127	0.943912	0.437151	-0.0844441	0.00682037	0.00157183	0.00345153	0.00486835	0.000633298	0.063342	0.0149766	0.0297369	0.0419437	0.0470087	0.063342
NA	YPW2549	1	TATA.25	Single	ura3d0	TATA	TTTAAAAA	TATAbox(-141TTTAAAAA)	6	0.284819	0.0336391	0.073867	0.118078	0.00873969	-3.08349	0.625425	0.636407	1.01731	0.648733	0.0234556	0.00408511	0.00182508	0.00400762	0.00544021	0.000860686	0.0675688	0.00897035	0.034528	0.0468706	0.0638873	0.0675688
Var16	YPW2550	1	TATA.26	Single	ura3d0	TATA	TCTCGTTT	TATAbox(-141TCTCGTTT)	5	0.105663	0.00895743	0.0196693	0.0847567	0.00166839	-3.56094	0.232021	0.169463	0.730229	0.123842	-0.453992	0.00131894	0.000330909	0.000726632	0.00226863	0.000105547	0.038536	0.00289621	0.00626037	0.0195456	0.00783459	0.038536
NA	YPW2551	1	TATA.27	Single	ura3d0	TATA	TATATAAG	TATAbox(-141TATATAAG)	6	0.462274	0.0528046	0.115952	0.114223	0.0132529	-3.13051	1.01509	0.998993	0.984098	0.98374	-0.0235617	0.00263102	0.00154583	0.00339443	0.00306861	0.000737875	0.0388562	0.00577737	0.029245	0.0264378	0.0547712	0.0388562
NA	YPW2553	1	TATA.29	Single	ura3d0	TATA	TATTTAAG	TATAbox(-141TATTTAAG)	6	0.44148	0.0513534	0.112765	0.116326	0.0131303	-3.10449	0.96943	0.971538	1.00222	0.974642	0.00246224	0.00531617	0.00182634	0.00401039	0.00406021	0.00090818	0.0506774	0.0116736	0.0345519	0.0349811	0.0674127	0.0506774
NA	YPW2554	1	TATA.30	Single	ura3d0	TATA	TATATACA	TATAbox(-141TATATACA)	6	0.206458	0.0261414	0.0574029	0.125837	0.00744281	-3.00883	0.453353	0.494559	1.08416	0.552468	0.0981204	0.00911638	0.00556477	0.0122195	0.0215805	0.00274134	0.255518	0.0200183	0.105278	0.185928	0.203485	0.255518
NA	YPW2555	1	TATA.31	Single	ura3d0	TATA	CATAAAAA	TATAbox(-141CATAAAAA)	6	0.292199	0.0357891	0.0785879	0.122442	0.00963941	-3.03086	0.641628	0.677081	1.05491	0.715518	0.0760927	0.00623341	0.00196379	0.00431221	0.00505663	0.000918653	0.059522	0.0136877	0.0371522	0.0435658	0.0681901	0.059522
NA	YPW2556	1	TATA.32	Single	ura3d0	TATA	TAGATAAC	TATAbox(-141TAGATAAC)	6	0.172396	0.0201435	0.0442324	0.116822	0.00517446	-3.09848	0.378558	0.381088	1.00649	0.384092	0.00846908	0.00282918	0.000938708	0.00206128	0.00440446	0.000429984	0.0545824	0.0062125	0.0177591	0.037947	0.031917	0.0545824
NA	YPW2557	1	TATA.33	Single	ura3d0	TATA	GCTATAAA	TATAbox(-141GCTATAAA)	6	0.304376	0.0382318	0.0839518	0.125624	0.0105478	-2.99301	0.668368	0.723294	1.08233	0.782948	0.11394	0.00373454	0.000468295	0.00102831	0.00227268	0.000297281	0.0261779	0.00820055	0.00885952	0.0195805	0.0220667	0.0261779
NA	YPW2558	1	TATA.34	Single	ura3d0	TATA	TATATAAA	TATAbox(-141TATATAAA)	6	0.462814	0.0533505	0.11715	0.115269	0.0135108	-3.11727	1.01628	1.00932	0.993106	1.00288	-0.0103223	0.00229659	0.00142187	0.00312224	0.00273901	0.000674656	0.034508	0.005043	0.0268999	0.0235982	0.0500786	0.034508
NA	YPW2559	1	TATA.35	Single	ura3d0	TATA	TAAATGAA	TATAbox(-141TAAATGAA)	6	0.146875	0.0165188	0.0362731	0.112397	0.00408622	-3.15449	0.322518	0.312514	0.968367	0.303314	-0.0475434	0.00298548	0.00103697	0.00227705	0.00495207	0.000436707	0.0636451	0.00655572	0.0196181	0.042665	0.0324161	0.0636451
NA	YPW2560	1	TATA.36	Single	ura3d0	TATA	TACAGAAA	TATAbox(-141TACAGAAA)	6	0.167301	0.0194432	0.0426946	0.116137	0.00496898	-3.10716	0.36737	0.367839	1.00059	0.36884	-0.000214102	0.0053319	0.00128886	0.00283016	0.00485946	0.000522283	0.060793	0.0117081	0.0243835	0.0418671	0.0387682	0.060793
NA	YPW2561	1	TATA.37	Single	ura3d0	TATA	TGTATAAA	TATAbox(-141TGTATAAA)	6	0.294118	0.0373635	0.0820452	0.126983	0.010434	-2.97806	0.645843	0.706868	1.09403	0.774496	0.128891	0.00464689	0.00189302	0.0041568	0.00455974	0.000912241	0.0511825	0.0102039	0.0358133	0.0392848	0.0677142	0.0511825
NA	YPW2562	1	TATA.38	Single	ura3d0	TATA	TCTAAAAA	TATAbox(-141TCTAAAAA)	6	0.161535	0.0192113	0.0421853	0.11876	0.0050238	-3.07482	0.354708	0.363451	1.02319	0.372908	0.032129	0.00837771	0.00170602	0.0037462	0.00470499	0.000645029	0.0569266	0.0183963	0.0322757	0.0405363	0.0478795	0.0569266
NA	YPW2563	1	TATA.39	Single	ura3d0	TATA	TGGAAAAG	TATAbox(-141TGGAAAAG)	5	0.14269	0.0161082	0.0353715	0.112903	0.00399387	-3.14698	0.313328	0.304746	0.972729	0.296459	-0.0400332	0.00280927	0.000297326	0.000652888	0.00177016	0.000112161	0.022687	0.00616876	0.00562502	0.015251	0.00832557	0.022687
NA	YPW2564	1	TATA.40	Single	ura3d0	TATA	GATGGAAA	TATAbox(-141GATGGAAA)	5	0.140653	0.0151837	0.0333413	0.107922	0.00360151	-3.21241	0.308856	0.287255	0.929808	0.267334	-0.105465	0.00172665	0.000609361	0.00133807	0.00305326	0.000242696	0.0413065	0.00379149	0.0115283	0.0263057	0.018015	0.0413065
NA	YPW2565	1	TATA.41	Single	ura3d0	TATA	CGTATAGA	TATAbox(-141CGTATAGA)	5	0.12708	0.0139153	0.0305561	0.109492	0.00334747	-3.19144	0.279051	0.263259	0.94334	0.248478	-0.0844904	0.002217	0.000459317	0.0010086	0.00264678	0.000184305	0.0350905	0.00486823	0.00868966	0.0228036	0.0136806	0.0350905
Var21	YPW2566	1	TATA.42	Single	ura3d0	TATA	TATCTAAA	TATAbox(-141TATCTAAA)	6	0.152501	0.0166973	0.0366651	0.109492	0.0040156	-3.19131	0.334872	0.315891	0.943338	0.298072	-0.0843582	0.00351959	0.000480447	0.001055	0.00202227	0.000171343	0.026618	0.00772854	0.00908942	0.017423	0.0127185	0.026618
NA	YPW2567	1	TATA.43	Single	ura3d0	TATA	TAGATACA	TATAbox(-141TAGATACA)	6	0.166088	0.0194301	0.042666	0.116903	0.00500015	-3.09785	0.364707	0.367592	1.00719	0.371153	0.00909554	0.00409075	0.00130281	0.00286079	0.00534703	0.000566792	0.0654181	0.00898272	0.0246474	0.0460678	0.0420721	0.0654181
NA	YPW2568	1	TATA.44	Single	ura3d0	TATA	TATCTAAC	TATAbox(-141TATCTAAC)	6	0.128762	0.0130237	0.0285983	0.101027	0.00289966	-3.30889	0.282743	0.246392	0.870406	0.215237	-0.201941	0.00463418	0.00110531	0.00242711	0.0054141	0.000404457	0.0764679	0.010176	0.020911	0.0466457	0.0300222	0.0764679
NA	YPW2569	1	TATA.45	Single	ura3d0	TATA	TATATAAA	TATAbox(-141TATATAAA)	6	0.462541	0.0562864	0.123597	0.121635	0.0150589	-3.04022	1.01568	1.06486	1.04796	1.1178	0.066729	0.00782636	0.00301314	0.00661645	0.00463787	0.00140497	0.0539378	0.0171856	0.0570046	0.039958	0.104289	0.0539378
NA	YPW2570	1	TATA.46	Single	ura3d0	TATA	TAAATATC	TATAbox(-141TAAATATC)	4	0.127144	0.013519	0.0296859	0.106371	0.00315853	-3.23329	0.27919	0.255762	0.916452	0.234453	-0.126343	0.00311147	0.000275657	0.000605305	0.00314943	0.00013976	0.0427383	0.00683236	0.00521506	0.0271342	0.0103742	0.0427383
NA	YPW2571	1	TATA.47	Single	ura3d0	TATA	TTTATCAA	TATAbox(-141TTTATCAA)	6	0.14836	0.0179054	0.0393178	0.120398	0.00477148	-3.05804	0.325779	0.338746	1.0373	0.354179	0.0489077	0.00610095	0.002138	0.00469475	0.00977318	0.000960514	0.11633	0.0133969	0.0404481	0.0842017	0.0712974	0.11633
NA	YPW2572	1	TATA.48	Single	ura3d0	TATA	TATATACC	TATAbox(-141TATATACC)	6	0.152999	0.0193324	0.0424513	0.125977	0.00539066	-2.99237	0.335965	0.365743	1.08537	0.40014	0.114575	0.00805097	0.00244522	0.00536938	0.00974602	0.00108903	0.111794	0.0176788	0.0462604	0.0839677	0.080837	0.111794
NA	YPW2574	1	TATA.50	Single	ura3d0	TATA	GATATAGA	TATAbox(-141GATATAGA)	6	0.160656	0.0190566	0.0418456	0.118255	0.00498501	-3.08301	0.352779	0.360525	1.01884	0.370029	0.0239378	0.00861402	0.00238675	0.00524097	0.00842566	0.000995331	0.101114	0.0189152	0.045154	0.072592	0.0738818	0.101114
NA	YPW2575	1	TATA.51	Single	ura3d0	TATA	TAGAAAAA	TATAbox(-141TAGAAAAA)	6	0.220586	0.0288873	0.0634326	0.130595	0.00834005	-2.93967	0.484376	0.546509	1.12515	0.619069	0.167284	0.0109644	0.00342699	0.00752519	0.00899623	0.00157107	0.0989229	0.0240762	0.064834	0.0775078	0.116618	0.0989229
NA	YPW2576	1	TATA.52	Single	ura3d0	TATA	TATATAAA	TATAbox(-141TATATAAA)	6	0.454257	0.0539002	0.118357	0.118627	0.0140571	-3.07615	0.997485	1.01972	1.02204	1.04344	0.0307947	0.0115103	0.00264993	0.00581889	0.00396071	0.00115081	0.0474089	0.025275	0.0501332	0.0341238	0.0854225	0.0474089
NA	YPW2577	1	TATA.53	Single	ura3d0	TATA	TCTATTCG	TATAbox(-141TCTATTCG)	6	0.114014	0.0117068	0.0257065	0.102482	0.00265142	-3.28974	0.25036	0.221476	0.88294	0.196811	-0.182788	0.00451771	0.00127352	0.00279648	0.00749044	0.000485601	0.104533	0.00992028	0.0240934	0.0645345	0.0360454	0.104533
NA	YPW2578	1	TATA.54	Single	ura3d0	TATA	TGTTTCAA	TATAbox(-141TGTTTCAA)	6	0.125709	0.0135445	0.0297418	0.107492	0.00321725	-3.22038	0.27604	0.256243	0.926106	0.238812	-0.113432	0.00624266	0.00156136	0.00342853	0.00729847	0.000604788	0.0955913	0.013708	0.0295388	0.0628807	0.0448924	0.0955913
NA	YPW2580	1	TATA.56	Single	ura3d0	TATA	TGTATAAA	TATAbox(-141TGTATAAA)	6	0.294252	0.0373896	0.0821026	0.127026	0.0104363	-2.97706	0.646136	0.707362	1.09441	0.774667	0.129893	0.00681373	0.00155998	0.0034255	0.00263068	0.000645723	0.0297835	0.014962	0.0295127	0.0226648	0.047931	0.0297835
NA	YPW2581	1	TATA.57	Single	ura3d0	TATA	TATATAAA	TATAbox(-141TATATAAA)	6	0.462719	0.0564212	0.123893	0.121846	0.0151231	-3.03765	1.01607	1.06741	1.04978	1.12257	0.0692999	0.0136347	0.0035395	0.00777227	0.00437688	0.00147879	0.0521223	0.0299399	0.0669627	0.0377094	0.109768	0.0521223
NA	YPW2582	1	TATA.58	Single	ura3d0	TATA	TATCGCAA	TATAbox(-141TATCGCAA)	6	0.139512	0.0146093	0.0320799	0.104659	0.00336724	-3.25794	0.306348	0.276388	0.901698	0.249945	-0.150992	0.0032169	0.00100791	0.00221323	0.00555029	0.000406306	0.0770872	0.00706388	0.0190683	0.0478191	0.0301594	0.0770872
NA	YPW2583	1	TATA.59	Single	ura3d0	TATA	GAGGTATG	TATAbox(-141GAGGTATG)	6	0.147837	0.0154701	0.0339703	0.104511	0.0035606	-3.25944	0.32463	0.292674	0.900425	0.264297	-0.152494	0.00699666	0.00132331	0.00290581	0.00462204	0.00045626	0.0636867	0.0153637	0.0250353	0.0398216	0.0338675	0.0636867
NA	YPW2585	1	TATA.61	Single	ura3d0	TATA	TAAGTAAA	TATAbox(-141TAAGTAAA)	6	0.14942	0.017346	0.0380895	0.115886	0.00443031	-3.11056	0.328106	0.328163	0.99843	0.328855	-0.00360579	0.00675866	0.00161959	0.00355641	0.00551899	0.000634336	0.0677958	0.0148411	0.0306405	0.0475493	0.0470858	0.0677958
NA	YPW2586	1	TATA.62	Single	ura3d0	TATA	TATGAACC	TATAbox(-141TATGAACC)	4	0.149391	0.0165495	0.0363404	0.110806	0.00402661	-3.17404	0.328042	0.313094	0.954662	0.298889	-0.0670862	0.0031933	0.000148467	0.000326013	0.00183391	6.5583e-05	0.0239442	0.00701205	0.00280879	0.0158002	0.00486812	0.0239442
NA	YPW2587	1	TATA.63	Single	ura3d0	TATA	TATGCCAA	TATAbox(-141TATGCCAA)	6	0.135141	0.0156084	0.034274	0.115378	0.00396451	-3.11663	0.296751	0.295291	0.994054	0.294279	-0.00967605	0.0042719	0.00113676	0.00249617	0.00488584	0.000457117	0.0608337	0.00938052	0.021506	0.0420944	0.0339311	0.0608337
NA	YPW2588	1	TATA.64	Single	ura3d0	TATA	TACAGGAA	TATAbox(-141TACAGGAA)	5	0.16613	0.0191491	0.0420488	0.115269	0.00485197	-3.1177	0.3648	0.362275	0.993114	0.360154	-0.0107526	0.00525177	0.000911947	0.00200251	0.00423157	0.000379515	0.0532412	0.0115322	0.0172528	0.0364574	0.0281708	0.0532412
NA	YPW2589	1	TATA.65	Single	ura3d0	TATA	TATAAAAA	TATAbox(-141TATAAAAA)	6	0.488115	0.057643	0.126576	0.118048	0.0149991	-3.08504	1.07184	1.09053	1.01705	1.11336	0.0219099	0.0049579	0.00414477	0.00910135	0.00756624	0.00203401	0.0927619	0.0108869	0.0784135	0.0651877	0.150981	0.0927619
NA	YPW2590	1	TATA.66	Single	ura3d0	TATA	TAAATAGA	TATAbox(-141TAAATAGA)	6	0.142681	0.0171269	0.0376084	0.119437	0.00455247	-3.0716	0.313308	0.324018	1.02902	0.337922	0.0353469	0.00878404	0.00277109	0.00608493	0.0119869	0.00120518	0.142413	0.0192886	0.0524253	0.103274	0.0894589	0.142413
NA	YPW2591	1	TATA.67	Single	ura3d0	TATA	GTCATACT	TATAbox(-141GTCATACT)	6	0.122429	0.0128989	0.0283243	0.105164	0.00299202	-3.25111	0.268838	0.244031	0.906047	0.222093	-0.144158	0.00528806	0.00127008	0.00278893	0.00582867	0.000467838	0.0789532	0.0116119	0.0240283	0.0502174	0.0347268	0.0789532
NA	YPW2592	1	TATA.68	Single	ura3d0	TATA	TATATAAA	TATAbox(-141TATATAAA)	6	0.463019	0.0546031	0.119901	0.11791	0.0141514	-3.08482	1.01673	1.03302	1.01587	1.05043	0.0221255	0.00323489	0.00205523	0.004513	0.00369829	0.000986733	0.0447826	0.00710337	0.0388821	0.031863	0.0732436	0.0447826
NA	YPW2593	1	TATA.69	Single	ura3d0	TATA	TATTATTC	TATAbox(-141TATTATTC)	6	0.125797	0.0138131	0.0303317	0.109585	0.00333685	-3.19119	0.276232	0.261325	0.944139	0.247689	-0.0842409	0.00687992	0.00140848	0.00309283	0.00513806	0.000503377	0.0672962	0.0151074	0.0266466	0.0442674	0.0373649	0.0672962
NA	YPW2594	1	TATA.70	Single	ura3d0	TATA	CATATGCA	TATAbox(-141CATATGCA)	4	0.112186	0.0123203	0.0270536	0.109821	0.00297109	-3.18679	0.246345	0.233083	0.946175	0.220539	-0.0798378	0.00205279	0.000222826	0.000489296	0.000604511	5.80315e-05	0.00794217	0.00450765	0.00421557	0.00520822	0.00430758	0.00794217
NA	YPW2595	1	TATA.71	Single	ura3d0	TATA	TTGCTAAA	TATAbox(-141TTGCTAAA)	5	0.127899	0.0140506	0.0308531	0.109759	0.0033952	-3.18882	0.280849	0.265818	0.945642	0.25202	-0.0818692	0.00409714	0.00103225	0.00226668	0.00507576	0.000401422	0.0667464	0.00899675	0.0195288	0.0437306	0.0297969	0.0667464
NA	YPW2596	1	TATA.72	Single	ura3d0	TATA	CATGCGGA	TATAbox(-141CATGCGGA)	5	0.116081	0.0135518	0.0297579	0.116223	0.00349452	-3.1094	0.254897	0.256382	1.00133	0.259393	-0.00244856	0.00853718	0.00209649	0.00460361	0.0100414	0.000826967	0.126	0.0187465	0.0396628	0.0865125	0.0613845	0.126
NA	YPW2597	1	TATA.73	Single	ura3d0	TATA	TACGAAAA	TATAbox(-141TACGAAAA)	5	0.157779	0.0171434	0.0376446	0.10856	0.0040953	-3.20432	0.346462	0.32433	0.93531	0.303988	-0.097371	0.0049038	0.00117722	0.00258501	0.00425838	0.000440853	0.0565729	0.0107681	0.0222714	0.0366885	0.0327238	0.0565729
NA	YPW2599	1	TATA.75	Single	ura3d0	TATA	TATATAAA	TATAbox(-141TATATAAA)	5	0.461963	0.0525682	0.115433	0.11377	0.013143	-3.13622	1.01441	0.99452	0.980195	0.975583	-0.0292665	0.00523027	0.00193676	0.00425285	0.00304416	0.000840771	0.0382259	0.011485	0.0366408	0.0262273	0.062409	0.0382259
NA	YPW2601	1	TATA.77	Single	ura3d0	TATA	AATATAAA	TATAbox(-141AATATAAA)	5	0.331218	0.040943	0.0899053	0.123642	0.0111404	-3.0175	0.727309	0.774587	1.06525	0.826934	0.0894522	0.00494126	0.00211427	0.00464264	0.00683773	0.00118503	0.0787478	0.0108503	0.0399991	0.058911	0.0879626	0.0787478
NA	YPW2602	1	TATA.78	Single	ura3d0	TATA	TATCAGCA	TATAbox(-141TATCAGCA)	5	0.13151	0.0140222	0.0307908	0.10655	0.00328474	-3.23078	0.288779	0.265281	0.917987	0.243821	-0.123833	0.00575835	0.000923731	0.00202839	0.00272126	0.000294108	0.0370109	0.0126446	0.0174758	0.0234452	0.0218312	0.0370109
NA	YPW2603	1	TATA.79	Single	ura3d0	TATA	TACTAAAA	TATAbox(-141TACTAAAA)	5	0.215814	0.0243464	0.0534615	0.112742	0.00603638	-3.14954	0.473899	0.460602	0.971335	0.448071	-0.0425867	0.00527665	0.00139382	0.00306064	0.00372287	0.000546328	0.0475437	0.0115868	0.0263692	0.0320747	0.040553	0.0475437
NA	YPW2604	1	TATA.80	Single	ura3d0	TATA	GAGATTCG	TATAbox(-141GAGATTCG)	5	0.12971	0.0134337	0.0294985	0.103252	0.00306835	-3.2786	0.284825	0.254147	0.889573	0.227758	-0.17165	0.00895856	0.00183319	0.00402544	0.00739744	0.000658151	0.100036	0.0196718	0.0346816	0.0637333	0.0488535	0.100036
Var22	YPW2605	1	TATA.81	Single	ura3d0	TATA	TATACAAA	TATAbox(-141TATACAAA)	5	0.193788	0.0229406	0.0503745	0.118246	0.00597963	-3.082	0.425532	0.434006	1.01876	0.443858	0.0249506	0.00569791	0.00196022	0.00430437	0.00682084	0.000877928	0.0813117	0.0125118	0.0370847	0.0587656	0.0651672	0.0813117
NA	YPW2606	1	TATA.82	Single	ura3d0	TATA	GATATTAA	TATAbox(-141GATATTAA)	5	0.179988	0.0218297	0.047935	0.121056	0.00582825	-3.04797	0.395229	0.412988	1.04297	0.432622	0.0589821	0.00781782	0.00217302	0.00477166	0.00667896	0.000920695	0.0780955	0.0171669	0.0411107	0.0575432	0.0683417	0.0780955
NA	YPW2607	1	TATA.84	Single	ura3d0	TATA	AATATCAA	TATAbox(-141AATATCAA)	5	0.152393	0.0181199	0.0397889	0.118715	0.00474538	-3.07644	0.334634	0.342805	1.0228	0.352242	0.0305072	0.00517965	0.00173617	0.00381239	0.00719039	0.000770981	0.0844205	0.0113738	0.032846	0.0619494	0.0572287	0.0844205
NA	YPW2608	1	TATA.85	Single	ura3d0	TATA	TATCGAAA	TATAbox(-141TATCGAAA)	5	0.142291	0.0151639	0.0332979	0.10643	0.00355277	-3.23287	0.312451	0.286881	0.916961	0.263717	-0.125916	0.00687861	0.00128488	0.00282142	0.00408889	0.000435815	0.05526	0.0151045	0.0243082	0.0352282	0.0323498	0.05526
NA	YPW2609	1	TATA.86	Single	ura3d0	TATA	GATATAAA	TATAbox(-141GATATAAA)	5	0.389466	0.0465119	0.102134	0.119388	0.0122051	-3.06671	0.855214	0.879944	1.0286	0.905962	0.040239	0.00586388	0.00198203	0.00435228	0.00333544	0.000874263	0.0397435	0.0128763	0.0374974	0.0287368	0.0648951	0.0397435
NA	YPW2610	1	TATA.87	Single	ura3d0	TATA	TATAGCAG	TATAbox(-141TATAGCAG)	4	0.163362	0.0195071	0.042835	0.11938	0.00512367	-3.06759	0.358721	0.369048	1.02853	0.380322	0.0393585	0.00270505	0.00110562	0.00242779	0.00570021	0.000532783	0.068408	0.00593993	0.0209169	0.0491107	0.0395476	0.068408
NA	YPW2611	1	TATA.88	Single	ura3d0	TATA	TACAGAAA	TATAbox(-141TACAGAAA)	5	0.166945	0.0195539	0.0429377	0.116782	0.00505767	-3.10183	0.366588	0.369933	1.00615	0.375423	0.0051173	0.00767362	0.00257052	0.00564452	0.00962514	0.00113109	0.114366	0.0168502	0.0486309	0.0829263	0.0839591	0.114366
NA	YPW2612	1	TATA.89	Single	ura3d0	TATA	TATATAAC	TATAbox(-141TATATAAC)	4	0.334896	0.0408961	0.0898022	0.122115	0.0109668	-3.03373	0.735386	0.773699	1.05209	0.814049	0.0732243	0.00109522	0.000404428	0.00088807	0.000997038	0.000196045	0.011745	0.00240495	0.00765125	0.00859007	0.0145521	0.011745
NA	YPW2613	1	TATA.90	Single	ura3d0	TATA	TAAGTAAA	TATAbox(-141TAAGTAAA)	5	0.149208	0.0170349	0.0374064	0.113889	0.00429606	-3.13837	0.32764	0.322278	0.981225	0.31889	-0.0314189	0.00571486	0.0021153	0.00464492	0.00971912	0.00092376	0.120299	0.0125491	0.0400187	0.0837359	0.0685692	0.120299
NA	YPW2614	1	TATA.91	Single	ura3d0	TATA	TATGCAAT	TATAbox(-141TATGCAAT)	4	0.14155	0.0156205	0.0343005	0.110314	0.00379014	-3.18129	0.310824	0.295519	0.950418	0.281336	-0.074344	0.00163584	0.00082927	0.00182096	0.00463431	0.000353149	0.0617077	0.00359209	0.0156887	0.0399273	0.0262137	0.0617077
NA	YPW2615	1	TATA.92	Single	ura3d0	TATA	TGACTAAA	TATAbox(-141TGACTAAA)	5	0.125852	0.0139923	0.0307252	0.110795	0.00343757	-3.17812	0.276354	0.264716	0.954561	0.255165	-0.0711738	0.00662602	0.00198744	0.00436414	0.00961217	0.000826117	0.119464	0.0145498	0.0375996	0.0828145	0.0613213	0.119464
NA	YPW2617	1	TATA.94	Single	ura3d0	TATA	TATATAAG	TATAbox(-141TATATAAG)	6	0.47278	0.0553614	0.121566	0.11709	0.0142407	-3.0946	1.03816	1.04736	1.0088	1.05706	0.0123487	0.00230423	0.00141407	0.00310512	0.0025528	0.000667722	0.031651	0.00505978	0.0267524	0.0219939	0.0495639	0.031651
NA	YPW2618	1	TATA.95	Single	ura3d0	TATA	AAAATAAA	TATAbox(-141AAAATAAA)	5	0.145169	0.016243	0.0356675	0.111853	0.00399274	-3.16065	0.318772	0.307297	0.963681	0.296375	-0.0537035	0.00296887	0.000702203	0.00154194	0.00269811	0.000270906	0.0343993	0.00651922	0.0132847	0.0232458	0.0201089	0.0343993
NA	YPW2619	1	TATA.96	Single	ura3d0	TATA	CATAAAAA	TATAbox(-141CATAAAAA)	6	0.291021	0.0358917	0.0788133	0.123254	0.00974776	-3.02235	0.639043	0.679023	1.0619	0.72356	0.0846008	0.00429762	0.00256864	0.00564039	0.00720958	0.00126732	0.0842272	0.00943699	0.0485953	0.0621148	0.0940711	0.0842272
NA	YPW2620	1	TATA.97	Single	ura3d0	TATA	TAAATATA	TATAbox(-141TAAATATA)	6	0.154478	0.0184519	0.0405178	0.119376	0.00484673	-3.06748	0.339213	0.349084	1.02849	0.359765	0.039472	0.00379821	0.00113009	0.00248152	0.00500757	0.000491618	0.0606471	0.00834036	0.0213798	0.0431432	0.036492	0.0606471
NA	YPW2621	1	TATA.98	Single	ura3d0	TATA	TTTATAAA	TATAbox(-141TTTATAAA)	5	0.331109	0.0411339	0.0903245	0.124229	0.011222	-3.00898	0.72707	0.778198	1.07031	0.832994	0.0979652	0.00303905	0.000613977	0.00134821	0.00128774	0.000269502	0.0149932	0.00667333	0.0116156	0.0110946	0.0200047	0.0149932
NA	YPW2622	1	TATA.99	Single	ura3d0	TATA	TATATGAA	TATAbox(-141TATATGAA)	6	0.27244	0.0372334	0.0817594	0.136077	0.0112792	-2.88411	0.598241	0.704405	1.17238	0.83724	0.222838	0.0136053	0.00582908	0.0127999	0.0144284	0.00299738	0.150362	0.0298754	0.110278	0.124309	0.222491	0.150362
NA	YPW2623	1	TATA.100	Single	ura3d0	TATA	TATATAAA	TATAbox(-141TATATAAA)	5	0.453209	0.052138	0.114488	0.11503	0.0131777	-3.12029	0.995186	0.986381	0.991051	0.978159	-0.0133389	0.00305507	0.00160875	0.0035326	0.00291395	0.000740888	0.0364962	0.00670853	0.0304354	0.0251054	0.0549949	0.0364962
NA	YPW2624	1	TATA.101	Single	ura3d0	TATA	AATATATA	TATAbox(-141AATATATA)	6	0.262627	0.0329261	0.0723011	0.12536	0.00906815	-2.99613	0.576694	0.622917	1.08005	0.673115	0.110815	0.00259566	0.000930494	0.00204324	0.00274822	0.000452796	0.0314061	0.00569972	0.0176037	0.0236775	0.0336103	0.0314061
NA	YPW2626	1	TATA.103	Single	ura3d0	TATA	TATAATAA	TATAbox(-141TATAATAA)	6	0.302798	0.0396014	0.0869593	0.13058	0.0114107	-2.93929	0.664902	0.749206	1.12503	0.847001	0.167657	0.00939978	0.00371715	0.00816236	0.00819105	0.00181948	0.0887164	0.0206406	0.0703235	0.0705707	0.135057	0.0887164
NA	YPW2627	1	TATA.104	Single	ura3d0	TATA	TATTTAAA	TATAbox(-141TATTTAAA)	6	0.429765	0.049805	0.109365	0.115927	0.0126862	-3.10939	0.943705	0.942244	0.99878	0.941674	-0.00243717	0.00596194	0.00115096	0.00252736	0.00393175	0.00071982	0.0481328	0.0130916	0.0217747	0.0338743	0.0534311	0.0481328
NA	YPW2628	1	TATA.105	Single	ura3d0	TATA	TGTATAAG	TATAbox(-141TGTATAAG)	5	0.1746	0.021325	0.0468269	0.122116	0.00572369	-3.03421	0.383397	0.403441	1.05211	0.424861	0.0727377	0.00190482	0.00082615	0.00181411	0.00378214	0.00040268	0.0439396	0.00418273	0.0156297	0.0325854	0.0298903	0.0439396
NA	YPW2629	1	TATA.106	Single	ura3d0	TATA	TATATACT	TATAbox(-141TATATACT)	6	0.159762	0.019436	0.0426789	0.121563	0.00519975	-3.04131	0.350816	0.367704	1.04733	0.385969	0.0656416	0.0037342	0.00124682	0.00273785	0.00512167	0.000545172	0.0612926	0.00819981	0.0235882	0.0441262	0.0404673	0.0612926
NA	YPW2631	1	TATA.109	Single	ura3d0	TATA	TATATAAG	TATAbox(-141TATATAAG)	6	0.47364	0.0551399	0.12108	0.116421	0.0141012	-3.10286	1.04005	1.04317	1.00303	1.04671	0.00409145	0.0043955	0.00121103	0.00265925	0.00250363	0.000601881	0.0310085	0.00965193	0.022911	0.0215702	0.0446767	0.0310085
NA	YPW2633	1	TATA.111	Single	ura3d0	TATA	GATATACC	TATAbox(-141GATATACC)	5	0.118479	0.0123886	0.0272037	0.104512	0.00284594	-3.25861	0.260163	0.234376	0.90043	0.21125	-0.151656	0.00317723	0.000637864	0.00140066	0.00256476	0.000219743	0.0349378	0.00697677	0.0120675	0.0220969	0.0163112	0.0349378
NA	YPW2635	1	TATA.113	Single	ura3d0	TATA	TATAAAAA	TATAbox(-141TATAAAAA)	6	0.493265	0.0630293	0.138404	0.127733	0.0177097	-2.96977	1.08314	1.19243	1.10049	1.31456	0.137181	0.00751699	0.00331968	0.00728956	0.00519917	0.00167238	0.0576326	0.0165063	0.0628039	0.0447939	0.124138	0.0576326
NA	YPW2636	1	TATA.114	Single	ura3d0	TATA	TATATAAA	TATAbox(-141TATATAAA)	6	0.461589	0.0547286	0.120177	0.118566	0.0142525	-3.07642	1.01359	1.03539	1.02152	1.05794	0.0305267	0.00450675	0.00107669	0.00236426	0.0021006	0.0005103	0.0256995	0.0098962	0.0203695	0.0180979	0.0378788	0.0256995
NA	YPW2638	1	TATA.116	Single	ura3d0	TATA	TTGTTAAA	TATAbox(-141TTGTTAAA)	6	0.143498	0.0161372	0.0354351	0.112259	0.00399711	-3.15712	0.315103	0.305295	0.967181	0.296699	-0.0501656	0.00563375	0.00159249	0.00349688	0.0066788	0.00065741	0.082668	0.0123709	0.0301277	0.0575418	0.0487985	0.082668
NA	YPW2639	1	TATA.117	Single	ura3d0	TATA	GATCTAAA	TATAbox(-141GATCTAAA)	5	0.129937	0.0138337	0.0303768	0.106414	0.00323938	-3.23341	0.285324	0.261714	0.916816	0.240454	-0.126465	0.00180145	0.000814422	0.00178836	0.00481577	0.000339925	0.0647737	0.00395574	0.0154078	0.0414907	0.0252321	0.0647737
NA	YPW2641	1	TATA.119	Single	ura3d0	TATA	TGTATAAA	TATAbox(-141TGTATAAA)	6	0.295914	0.0370168	0.0812839	0.125079	0.0101719	-2.99936	0.649788	0.700309	1.07763	0.755043	0.107586	0.00252032	0.00104537	0.00229548	0.00266769	0.000502068	0.0307362	0.00553427	0.019777	0.0229837	0.0372677	0.0307362
NA	YPW2642	1	TATA.120	Single	ura3d0	TATA	TTTACAAA	TATAbox(-141TTTACAAA)	6	0.133582	0.015668	0.0344049	0.117195	0.00404186	-3.09417	0.293329	0.296418	1.00971	0.300021	0.0127816	0.00309315	0.0010447	0.00229402	0.0051365	0.000446968	0.0631771	0.00679213	0.0197643	0.0442539	0.0331777	0.0631771
NA	YPW2643	1	TATA.121	Single	ura3d0	TATA	ATTATAAA	TATAbox(-141ATTATAAA)	6	0.305577	0.0412351	0.0905466	0.13488	0.0122331	-2.89109	0.671007	0.780113	1.16207	0.908043	0.215861	0.00738483	0.00231161	0.00507597	0.00507771	0.00114526	0.0537386	0.0162161	0.0437325	0.0437475	0.0850106	0.0537386
NA	YPW2644	1	TATA.122	Single	ura3d0	TATA	AATTTGGC	TATAbox(-141AATTTGGC)	6	0.122953	0.0122315	0.0268588	0.09938	0.00268965	-3.33543	0.269989	0.231404	0.856218	0.199648	-0.228479	0.00305605	0.00128126	0.00281347	0.00886055	0.00053688	0.123571	0.00671067	0.0242397	0.0763388	0.0398517	0.123571
NA	YPW2645	1	TATA.123	Single	ura3d0	TATA	TATATAAA	TATAbox(-141TATATAAA)	6	0.461212	0.0508597	0.111681	0.110277	0.0123182	-3.18095	1.01276	0.962198	0.9501	0.914359	-0.0740048	0.00213135	0.000756146	0.00166039	0.00176938	0.000374319	0.0233471	0.00468015	0.0143053	0.0152443	0.0277851	0.0233471
NA	YPW2647	1	TATA.125	Single	ura3d0	TATA	TATAGCAA	TATAbox(-141TATAGCAA)	6	0.164008	0.0186418	0.0409349	0.113621	0.0046616	-3.13901	0.360138	0.352678	0.978911	0.346023	-0.0320561	0.0025088	0.00109184	0.00239752	0.00538274	0.000503567	0.0666984	0.00550898	0.0206561	0.0463755	0.037379	0.0666984
NA	YPW2650	1	TATA.128	Single	ura3d0	TATA	TATATAAC	TATAbox(-141TATATAAC)	6	0.33818	0.0467952	0.102756	0.138334	0.0142455	-2.85518	0.742598	0.885303	1.19183	1.05742	0.251767	0.00922212	0.00283601	0.0062275	0.006635	0.00147679	0.0700613	0.0202505	0.0536536	0.0571644	0.10962	0.0700613
Var17	YPW2651	1	TATA.129	Single	ura3d0	TATA	TATATAGA	TATAbox(-141TATATAGA)	6	0.296325	0.0367379	0.0806715	0.123933	0.0100154	-3.01333	0.65069	0.695032	1.06776	0.743424	0.0936224	0.00434239	0.00194167	0.00426364	0.00501322	0.000950399	0.0575164	0.0095353	0.0367338	0.0431919	0.0705466	0.0575164
NA	YPW2652	1	TATA.131	Single	ura3d0	TATA	TATCTAAG	TATAbox(-141TATCTAAG)	6	0.153809	0.0171589	0.0376786	0.111549	0.00420693	-3.16485	0.337743	0.324623	0.961065	0.312274	-0.0578965	0.0039983	0.000743764	0.0016332	0.00354392	0.000300756	0.0455503	0.00877972	0.014071	0.030533	0.0223246	0.0455503
NA	YPW2654	1	TATA.133	Single	ura3d0	TATA	TATATAAA	TATAbox(-141TATATAAA)	6	0.461149	0.0534873	0.117451	0.115985	0.0136265	-3.10819	1.01262	1.01191	0.999278	1.01147	-0.00124241	0.00183139	0.00105292	0.00231207	0.00210691	0.00050986	0.0264062	0.00402149	0.0199198	0.0181522	0.0378461	0.0264062
NA	YPW2655	1	TATA.134	Single	ura3d0	TATA	TATATAAA	TATAbox(-141TATATAAA)	5	0.458777	0.0541376	0.118879	0.117999	0.0140413	-3.08382	1.00741	1.02421	1.01663	1.04226	0.023133	0.00158756	0.00194432	0.00426945	0.00403119	0.000992937	0.0487513	0.00348606	0.0367839	0.0347311	0.0737041	0.0487513
Var18	YPW2656	1	TATA.135	Single	ura3d0	TATA	TATACAAT	TATAbox(-141TATACAAT)	6	0.159855	0.0185343	0.0406988	0.115889	0.00472572	-3.11022	0.35102	0.350644	0.998452	0.350782	-0.00327142	0.0031041	0.00106563	0.00233998	0.00484662	0.000470573	0.0596896	0.00681619	0.0201603	0.0417565	0.0349299	0.0596896
NA	YPW2657	1	TATA.136	Single	ura3d0	TATA	GATTTTCA	TATAbox(-141GATTTTCA)	6	0.121498	0.0125563	0.0275719	0.103289	0.00285159	-3.27578	0.266793	0.237548	0.889896	0.211669	-0.168831	0.00274779	0.000658239	0.0014454	0.00309993	0.000235868	0.043157	0.00603377	0.012453	0.0267077	0.0175081	0.043157
NA	YPW2658	1	TATA.137	Single	ura3d0	TATA	TGTATAAG	TATAbox(-141TGTATAAG)	6	0.176795	0.0217959	0.0478608	0.123249	0.0059037	-3.02075	0.388218	0.412349	1.06186	0.438222	0.0861948	0.00249575	0.000853573	0.00187433	0.00318116	0.000382819	0.0372003	0.00548032	0.0161485	0.0274076	0.028416	0.0372003
Var34	YPW2840	3	m63.m89.TATA.22	Single	ura3d0	TFBS.TATA	TATATACA	RAP1(G-510a); GCR1.2(C-447t); TATAbox(-141TATATAcA)	4	0.0227546	0.00660728	0.0172934	0.290497	0.00502662	-1.78413	0.0595562	0.171614	2.88279	0.495017	1.52674	0.000463697	0.000163822	0.000428775	0.0106972	0.000300924	0.0528456	0.00121365	0.00425502	0.106155	0.0296347	0.0528456
Var28	YPW2824	3	m63.m89.TATA.26	Single	ura3d0	TFBS.TATA	TCTCGTTT	RAP1(G-510a); GCR1.2(C-447t); TATAbox(-141TcTcgttt)	4	0.0112645	0.00270844	0.00708887	0.24016	0.00177896	-2.0902	0.0294829	0.0703475	2.38326	0.17519	1.22067	0.000313553	0.000673139	0.00176183	0.0581888	0.000836537	0.353171	0.000820672	0.0174838	0.577446	0.0823813	0.353171
Var30	YPW2828	3	m75.m63.TATA.22	Single	ura3d0	TFBS.TATA	TATATACA	RAP1(G-510a); GCR1.1(C-485t); TATAbox(-141TATATAcA)	4	0.00139409	-5.60866e-05	-0.000146797	0.446967	0.000711088	-1.16452	0.00364878	-0.00145676	4.43555	0.0700272	2.14635	0.000390372	0.000821625	0.00215046	0.0390948	0.000213475	0.126349	0.00102173	0.0213404	0.387963	0.0210228	0.126349
Var24	YPW2812	1	m75.m63.TATA.26	Single	ura3d0	TFBS.TATA	TCTCGTTT	RAP1(G-510a); GCR1.1(C-485t); TATAbox(-141TcTcgttt)	4	0.000467374	-0.000423468	-0.00110835	0.545518	0.00096692	-0.874301	0.00122327	-0.0109989	5.41354	0.0952213	2.43657	0.000569165	0.000836249	0.00218874	NA	NA	NA	0.00148969	0.0217203	NA	NA	NA
Var32	YPW2834	3	m75.m90.TATA.22	Single	ura3d0	TFBS.TATA	TATATACA	GCR1.1(C-485t); GCR1.2(C-444t); TATAbox(-141TATATAcA)	4	0.0103044	0.00141874	0.0037133	0.139444	0.000600452	-2.97549	0.02697	0.0368495	1.38379	0.0591319	0.335384	0.000395987	0.00063149	0.00165282	0.06677	0.000489388	0.72563	0.00103643	0.016402	0.662603	0.0481945	0.72563
Var26	YPW2820	3	m75.m90.TATA.26	Single	ura3d0	TFBS.TATA	TCTCGTTT	GCR1.1(C-485t); GCR1.2(C-444t); TATAbox(-141TcTcgttt)	4	0.00955607	0.00063501	0.00166203	0.102818	0.000337381	-3.63562	0.0250114	0.0164934	1.02034	0.033225	-0.324748	0.000459481	0.000856081	0.00224065	0.0678105	0.000293942	1.39545	0.00120261	0.0222354	0.672928	0.0289471	1.39545
Var35	YPW2842	3	m75.TATA.22	Single	ura3d0	TFBS.TATA	TATATACA	GCR1.1(C-485t); TATAbox(-141TATATAcA)	4	0.0527092	0.00628648	0.0164538	0.119591	0.00199558	-3.07611	0.137957	0.163282	1.18678	0.196522	0.234767	0.0013308	0.000793751	0.00207751	0.017913	0.000541454	0.217909	0.00348314	0.0206165	0.177763	0.0533218	0.217909
Var29	YPW2826	3	m75.TATA.26	Single	ura3d0	TFBS.TATA	TCTCGTTT	GCR1.1(C-485t); TATAbox(-141TcTcgttt)	4	0.036914	0.00223244	0.00584302	0.0605251	0.000366851	-4.07775	0.0966161	0.0579841	0.60063	0.0361271	-0.766875	0.000964527	0.000500388	0.00130968	0.013532	0.000146791	0.360757	0.00252448	0.0129968	0.134287	0.0144559	0.360757
Var31	YPW2832	2	m76.m90.TATA.22	Single	ura3d0	TFBS.TATA	TATATACA	GCR1.1(C-482t); GCR1.2(C-444t); TATAbox(-141TATATAcA)	4	0.00567531	0.00120414	0.00315162	0.213499	0.000734066	-2.31382	0.0148542	0.0312756	2.11869	0.0722901	0.997048	0.000295328	0.000411212	0.00107628	0.0770436	0.000430621	0.605434	0.000772971	0.0106806	0.764554	0.0424071	0.605434
Var25	YPW2814	3	m76.m90.TATA.26	Single	ura3d0	TFBS.TATA	TCTCGTTT	GCR1.1(C-482t); GCR1.2(C-444t); TATAbox(-141TcTcgttt)	3	0.00547081	0.0010922	0.00285864	0.328467	0.00160969	-1.64217	0.0143189	0.0283682	3.2596	0.158521	1.6687	5.61282e-05	0.00126384	0.00330789	0.102486	0.000955481	0.457664	0.000146906	0.0328264	1.01704	0.0940948	0.457664
Var33	YPW2836	3	m76.TATA.22	Single	ura3d0	TFBS.TATA	TATATACA	GCR1.1(C-482t); TATAbox(-141TATATAcA)	3	0.019459	0.00349269	0.00914152	0.179483	0.00165273	-2.4835	0.0509307	0.0907173	1.78113	0.162759	0.827371	3.47217e-05	0.000366587	0.000959479	0.0187316	0.000336274	0.154428	9.08781e-05	0.00952154	0.185886	0.0331159	0.154428
Var27	YPW2816	3	m76.TATA.26	Single	ura3d0	TFBS.TATA	TCTCGTTT	GCR1.1(C-482t); TATAbox(-141TcTcgttt)	8	0.0166844	0.00190483	0.00498556	0.114632	0.000621678	-3.19139	0.0436686	0.049475	1.13757	0.0612222	0.119478	0.000423379	0.000590799	0.00154631	0.0371785	0.000381438	0.468255	0.00110812	0.0153451	0.368946	0.0375636	0.468255
Var23	YPW2653	1	m75.TATA.42	Single	ura3d0	TFBS.TATA	TATCTAAA	GCR1.1(C-485t); TATAbox(-141TATcTAAA)	4	0.0489409	0.00417652	0.0109313	0.0855809	0.000947037	-3.55741	0.128094	0.108479	0.849276	0.0932632	-0.246542	0.00168079	0.000489396	0.00128091	0.0121786	0.000245089	0.203757	0.00439918	0.0127113	0.120857	0.0241361	0.203757
Var39	YPW3022	3	m63.m89_m63.m89	Double	URA3	Duplication	TATATAAA	RAP1(G-510a); GCR1.2(C-447t)_RAP1(G-510a); GCR1.2(C-447t)	4	0.343801	0.0597962	0.156472	0.174016	0.0272495	-2.52362	0.899645	1.43215	1.59272	2.28276	0.670578	0.00668136	0.00159721	0.00417951	0.00716251	0.00182515	0.0593073	0.0174835	0.0382539	0.0655566	0.152898	0.0593073
Var40	YPW3010	1	m63.m89_TATA.42	Double	URA3	Duplication	TATATAAA_TATCTAAA	RAP1(G-510a); GCR1.2(C-447t)_TATAbox(-141TATcTAAA)	3	0.469033	0.0637629	0.166853	0.136004	0.0227212	-2.87949	1.22735	1.52716	1.2448	1.90341	0.314709	0.00603985	0.0023958	0.00626925	0.00686701	0.00201418	0.0721286	0.0158049	0.0573807	0.0628519	0.168733	0.0721286
Var38	YPW3021	2	m63.m90_TATA.26	Double	URA3	Duplication	TATATAAA_TCTCGTTT	RAP1(G-510a); GCR1.2(C-444t)_TATAbox(-141TcTcgttt)	4	0.213786	0.0265288	0.0694196	0.124118	0.00861906	-3.01062	0.559427	0.635379	1.13601	0.72204	0.183584	0.00274586	0.000474693	0.00124216	0.00334761	0.000378021	0.0391896	0.00718527	0.0113692	0.0306397	0.0316678	0.0391896
Var42	YPW3034	2	m66_m66	Double	URA3	Duplication	TATATAAA	RAP1(G-505a)_RAP1(G-505a)	4	0.669137	0.0860072	0.225061	0.128438	0.0289568	-2.96153	1.75097	2.05992	1.17556	2.42579	0.23267	0.0650262	0.00969009	0.0253567	0.00456917	0.00399018	0.050606	0.170158	0.232083	0.0418204	0.334267	0.050606
Var43	YPW3040	5	m66_TATA.129	Double	URA3	Duplication	TATATAAA_TATATAGA	RAP1(G-505a)_TATAbox(-141TATATAgA)	4	0.405123	0.0463989	0.121415	0.114521	0.0139094	-3.12651	1.06011	1.11128	1.04818	1.16523	0.067696	0.00433238	0.00121275	0.00317348	0.00216593	0.000614553	0.0273666	0.0113368	0.029046	0.0198241	0.0514826	0.0273666
Var41	YPW3028	2	m75_m75	Double	URA3	Duplication	TATATAAA	GCR1.1(C-485t)_GCR1.1(C-485t)	3	0.441284	0.0629486	0.164722	0.142614	0.0235088	-2.81017	1.15474	1.50765	1.30531	1.96939	0.384033	0.00697051	0.00259124	0.00678066	0.00388419	0.00158363	0.0395644	0.0182402	0.0620616	0.0355509	0.132665	0.0395644
Var37	YPW3019	1	TATA.26_TATA.26	Double	URA3	Duplication	TCTCGTTT_TCTCGTTT	TATAbox(-141TcTcgttt)_TATAbox(-141TcTcgttt)	4	0.168795	0.0149864	0.0392158	0.0888537	0.00349366	-3.49484	0.441696	0.358932	0.813254	0.292673	-0.300641	0.00349749	0.000803186	0.00210175	0.00603025	0.000427961	0.0957729	0.0091521	0.0192367	0.0551932	0.0358514	0.0957729
Var36	YPW2671	1	WT_WT	Double	URA3	Duplication	TATATAAA	WT_WT	12	0.792456	0.115523	0.302296	0.145778	0.0168407	-2.77815	2.07367	2.76683	1.33978	3.70835	0.275973	0.0122878	0.00679857	0.0177903	0.0056444	0.00519767	0.054794	0.0321544	0.162829	0.0516617	0.435422	0.054794
