# Supplementary material for: Fitness effects of altering gene expression noise in Saccharomyces cerevisiae
Source: eLife journal article supplement (doi:10.7554/elife.37272), 2018-08-20
Supplement: supp [file elife_poa_e37272_Figure_1_source_data_1.xls]

## Sheet: Legend
Figure 1 - Source Data 1
Parallel measurements of fluorescence levels by flow cytometry and of YFP mRNA levels by pyrosequencing.
Pyrosequencing data were analyzed using the R script available in Supplementary File 3.
These data were used to make Figure 1B-C.
Headers	Description
VARIANT.ID	Unique name for each PTDH3 allele. See Figure 2-3 - Source Data 1 for further details.
STRAIN	Name of yeast strain carrying the corresponding PTDH3 allele(s) at the HO locus.
YFP.COPY	Expected number of copies of the PTDH3-YFP-TCYC1 construct.
MEDIAN.FLUO	Median fluorescence levels across replicate populations measured immediately prior to the DNA/RNA coextractions.
MEDIAN.FLUO.SD	Standard deviation of the median fluorescence levels across replicate populations measured immediately prior to the DNA/RNA coextractions.
N.FLUO	Number of replicate populations of the same strain analyzed by flow cytometry and pyrosequencing.
YFP.DNA.MEAN	Mean proportion of DNA from the tested strain in the DNA extraction across replicate populations, as measured by pyrosequencing.
YFP.DNA.SD	Standard deviation of the proportion of DNA from the tested strain in the DNA extraction across replicate populations, as measured by pyrosequencing.
YFP.RNA.MEAN	Mean proportion of YFP over GFP mRNA in the RNA extraction across replicate populations, as measured by pyrosequencing.
YFP.RNA.SD	Standard deviation of the proportion of YFP over GFP RNA in the RNA extraction across replicate populations, as measured by pyrosequencing.
RNA.LEVEL	Mean YFP mRNA level across replicate populations calculated from the proportions of DNA and RNA in the coextraction.
RNA.LOW.CI	Size of the lower error bar of the 95% confidence interval of RNA.LEVEL calculated using the Fieller's theorem (t.test.ration function in R).
RNA.HIGH.CI	Size of the upper error bar of the 95% confidence interval of RNA.LEVEL calculated using the Fieller's theorem (t.test.ration function in R).
RNA.RELATIVE	Similar as RNA.LEVEL, but expressed relative to the reference allele (Var1.1) and after subtracting the RNA.LEVEL measured for the non-fluorescent strain (Var0).

## Sheet: Data
VARIANT.ID	STRAIN	YFP.COPY	MEDIAN.FLUO	MEDIAN.FLUO.SD	N.FLUO	YFP.DNA.MEAN	YFP.DNA.SD	YFP.RNA.MEAN	YFP.RNA.SD	RNA.LEVEL	RNA.LOW.CI	RNA.HIGH.CI	RNA.RELATIVE
Var4	YPW1897	1	0.841136	0.0235087	3	0.501701	0.00378965	0.354234	0.00322388	0.505715	0.0134624	0.0136751	0.505715
Var14	YPW2475	1	0.670914	0.0533887	3	0.515355	0.00892602	0.0908685	0.00944736	0.0872468	0.0436595	0.0442513	0.0872468
Var21	YPW2566	1	0.760077	0.0208963	4	0.524201	0.0105494	0.147538	0.00383737	0.145814	0.0149163	0.0155328	0.145814
Var1.2	YPW2676	1	0.906878	0.0189484	8	0.656843	0.00678653	0.657297	0.017899	0.930081	0.0586636	0.0595422	0.930081
Var27	YPW2816	1	0.600259	0.042122	8	0.519146	0.0110992	0.0414693	0.0163882	0.0371955	0.0779829	0.0784298	0.0371955
Var0	YPW978	0	0.519117	0.0637497	8	0.000387186	0.00397488	0.00759927	0.00995978	0	NA	NA	0
Var36	YPW2671	2	0.987364	0.022408	12	0.885279	0.00283373	0.892546	0.00500601	1.99822	0.0231207	0.0232517	1.99822
Var1.1	YPW1002	1	0.905812	0.0186071	28	0.505899	0.00868981	0.524504	0.00828148	1	0.0381151	0.0396971	1
