# Supplementary material for: Fitness effects of altering gene expression noise in Saccharomyces cerevisiae
Source: eLife. 2018 Aug 20;7:e37272. doi: 10.7554/eLife.37272 (PMC6133559; doi:10.7554/eLife.37272)
Supplement: Supplementary file 1. [file elife-37272-supp1.xlsx]

## Sheet: Legend
Supplementary File 1
Datasets generated using the R scripts provided in Supplementary File 3 and used to make the Source Data files for figures.
Dataset 1
Pyrosequencing data used to quantify YFP mRNA levels in 8 strains with different PTDH3 alleles.
This dataset was used to generate Figure 1 - Source Data 1.
Headers	Description
WELL	Position in the 96-well plate.
VARIANT.ID	Unique name for each PTDH3 allele.
STRAIN.1	Name of the tested strain expressing a PTDH3-YFP-TCYC1 transgene.
STRAIN.2	Name of the strain mixed with the tested strain and expressing a PTDH3-GFP-TCYC1 transgene.
CLASS	Indicate if pyrosequencing was done on the DNA extraction or on the RNA extraction.
YFP.COPY	Number of copies of the PTDH3-YFP-TCYC1 transgene.
POSITION1.C	Height of the 1st peak on the pyrogram after dispensation of nucleotide C.
POSITION2.T	Height of the 2nd peak on the pyrogram after dispensation of nucleotide T.
POSITION3.G	Height of the 3rd peak on the pyrogram after dispensation of nucleotide G.
POSITION4.A	Height of the 4th peak on the pyrogram after dispensation of nucleotide A.
POSITION5.T	Height of the 5th peak on the pyrogram after dispensation of nucleotide T.
POSITION6.G	Height of the 6th peak on the pyrogram after dispensation of nucleotide G.
POSITION7.C	Height of the 7th peak on the pyrogram after dispensation of nucleotide C.
POSITION8.A	Height of the 8th peak on the pyrogram after dispensation of nucleotide A.
POSITION9.T	Height of the 9th peak on the pyrogram after dispensation of nucleotide T.
FREQ5.T	Frequency of nucleotide T at position 5 (YFP allele) relative to nucleotide G at position 6 (GFP allele).
FREQ8.A	Frequency of nucleotide A at position 8 (YFP allele) relative to nucleotide T at position 9 (GFP allele).
YFP.PYRO	Mean of FREQ5.T and FREQ8.A used as a measure of YFP allele frequency.
YFP.CORRECTED	YFP allele frequency after correction for pyrosequencing bias. Bias in allele frequency was determined from the YFP frequency observed in samples without any copy of YFP, with YFP only or with both one copy of YFP and one copy of GFP.
Dataset 2
Expression data for all replicate populations of the 43 PTDH3 genotypes.
This dataset was used to generate Figure 2&3 - Source Data 1.
Headers	Description
ID	Unique identifier for each strain.
STRAIN	Name of yeast strain carrying the corresponding PTDH3 allele(s) at the HO locus.
MUTATION	Arbitrary name referring to the mutation(s) carried by the PTDH3 allele.
CLONE	Number used to distinguish independent colonies from the same transformation.
YFP.CONSTRUCT	Number of copies of the PTDH3-YFP-TCYC1 construct.
DAY	Number used to distinguish samples scored on different days.
REP	Number used to distinguish different replicate populations of the same genotype.
PLATE	Number used to distinguish samples scored on different 96-well plates.
ROW	Indicates on which row the sample is positioned in the 96-well plate.
COL	Indicates on which column the sample is positioned in the 96-well plate.
POSITION	Position of the sample in the 96-well plate.
BLOCK	Number used to distinguish samples that were scored on different flow cytometry runs for each plate.
STACK	Position of the plate in the incubator.
DEPTH	Vertical position of the plate in the STACK. 1 corresponds to the top position and 4 to the bottom.
ORDER	Order in which the plates were run on the flow cytometer.
FLOW.RUN	Number used to distinguish samples that were scored on different flow cytometry runs across the whole experiment.
BLOCKxROW	Row number in each BLOCK.
COUNTS.INITIAL	Total number of events recorded by flow cytometry.
COUNTS.GATES	Number of events after filtering out events with extreme values of forward scatter (cell size).
COUNTS.SINGLES	Number of events after filtering out doublets, corresponding to two cells recorded at the same time or to budding cells.
COUNTS.FINAL	Final number of events after filtering out events with aberrant fluorescence levels.
FSC.KURTOSIS	Kurtosis (fourth moment) of the forward scatter area (FSC.A) among all cells.
WIDTH	Average width of flow events.
FSC.MEDIAN.INITIAL	Median value of logFSC.A before data transformation.
FSC.MAD.INITIAL	Median absolute deviation (MAD) of logFSC.A before data transformation.
FL1.MEDIAN.INITIAL	Median value of fluorescence (logFL1.A) before data transformation.
FL1.MAD.INITIAL	Median absolute deviation (MAD) of fluorescence (logFL1.A) before data transformation.
YFP.MEDIAN.INITIAL	Median value of logFL1.A divided by logFSC.A before data transformation.
YFP.MAD.INITIAL	Median absolute deviation (MAD) of logFL1.A divided by logFSC.A before data transformation.
YFP.SD.INITIAL	Standard deviation of logFL1.A divided by logFSC.A before data transformation.
INTERCEPT.INITIAL	Intercept of the linear regression of logFL1.A on logFSC.A.
SLOPE.INITIAL	Regression coefficient of the linear regression of logFL1.A on logFSC.A.
THETA	Radian measure of the angle of rotation used to transform logFL1.A and logFSC.A data.
YFP.MEDIAN.ROT	Median value of logFL1.A divided by logFSC.A after applying the rotation.
YFP.MAD.ROT	Median absolute deviation (MAD) of logFL1.A divided by logFSC.A after applying the rotation.
YFP.SD.ROT	Standard deviation of logFL1.A divided by logFSC.A after applying the rotation.
FSC.MEDIAN.FINAL	Median value of logFSC.A before data after applying the rotation.
FSC.MAD.FINAL	Median absolute deviation (MAD) of logFSC.A after applying the rotation.
YFP.MEDIAN.FINAL	Median value of logFL1.A divided by logFSC.A before after applying the transformation for linear scaling with mRNA level.
YFP.MAD.FINAL	Median absolute deviation of logFL1.A divided by logFSC.A before after applying the transformation for linear scaling with mRNA level.
YFP.SD.FINAL	Standard deviation of logFL1.A divided by logFSC.A before after applying the transformation for linear scaling with mRNA level.
log.YFP.MEDIAN	Median value of the logarithm of logFL1.A divided by logFSC.A before after applying the transformation for linear scaling with mRNA level.
log.YFP.MAD	Median absolute deviation of the logarithm of logFL1.A divided by logFSC.A before after applying the transformation for linear scaling with mRNA level.
log.YFP.SD	Standard deviation of the logarithm of logFL1.A divided by logFSC.A before after applying the transformation for linear scaling with mRNA level.
log.RNA.MEDIAN	Transformed value of YFP.MEDIAN.FINAL used to correct for FLOW.RUN and ROW effects.
log.RNA.SD	Transformed value of YFP.SD.FINAL used to correct for FLOW.RUN and ROW effects.
FSC.MEDIAN.CORRECT	FSC.MEDIAN.FINAL corrected for FLOW.RUN and ROW effects.
log.RNA.MEDIAN.CORRECT	log.RNA.MEDIAN corrected for FLOW.RUN and ROW effects.
YFP.MEDIAN.CORRECT	log.RNA.MEDIAN.CORRECT transformed back on the same scale as YFP.MEDIAN.FINAL.
log.RNA.SD.CORRECT	log.RNA.SDcorrected for FLOW.RUN and ROW effects.
YFP.SD.CORRECT	log.RNA.SD.CORRECT transformed back on the same scale as YFP.SD.FINAL.
YFP.MEDIAN.ADJUST	YFP.MEDIAN.CORRECT substracted by the mean value of YFP.MEDIAN.CORRECT for the non-fluorescent strain YPW978 (correction for autofluorescence).
YFP.SD.ADJUST	YFP.SD.CORRECT substracted by the mean value of YFP.SD.CORRECT for the non-fluorescent strain YPW978 (correction for autofluorescence).
YFP.MEDIAN.RELATIVE	YFP.MEDIAN.ADJUST divided by the mean value of YFP.MEDIAN.ADJUST for the reference strain.
YFP.SD.SCALED	YFP.SD.ADJUST divided by the mean value of YFP.MEDIAN.ADJUST for the reference strain.
YFP.CV	YFP.SD.SCALED divided by YFP.MEDIAN.RELATIVE.
YFP.FANO	Squared YFP.SD.SCALED divided by YFP.MEDIAN.RELATIVE.
YFP.LOG.CV	Logarithm of YFP.SD.SCALED divided by YFP.MEDIAN.RELATIVE.
YFP.SD.RELATIVE	YFP.SD.SCALED divided by the mean value of YFP.SD.SCALED for the reference strain.
YFP.CV.RELATIVE	YFP.CV divided by the mean value of YFP.CV for the reference strain.
YFP.FANO.RELATIVE	YFP.FANO divided by the mean value of YFP.FANO for the reference strain.
YFP.LOG.CV.RELATIVE	YFP.LOG.CV divided by the mean value of YFP.LOG.CV for the reference strain.
YFP.MEDIAN.OUTLIER	Indicates whether the value of YFP.MEDIAN.RELATIVE is an outlier among all replicate populations of the same genotype.
YFP.SD.OUTLIER	Indicates whether the value of YFP.SD.RELATIVE is an outlier among all replicate populations of the same genotype.
Dataset 3
Fitness data for all replicate populations of the 43 PTDH3 genotypes.
Genotype frequencies were quantified by flow cytometry at 4 time points separated by 10 h of growth in YPD medium.
This dataset was used to generate Figure 2&3 - Source Data 1.
Headers	Description
ID	Unique identifier for each tested strain.
STRAIN	Name of the tested strain expressing a YFP reporter gene inserted at HO and with a specific PTDH3 allele inserted at the native TDH3 locus. Each strain was competed against the GFP strain YPW1160.
MUTATION	Arbitrary name referring to the mutation(s) carried by the PTDH3 allele in the tested strain.
YFP.CONSTRUCT	Number of copies of the PTDH3-TDH3 construct inserted at the native TDH3 locus.
POSITION	Position of the sample in the 96-well plate.
COLUMN	Indicates on which column the sample is positioned in the 96-well plate.
ROW	Indicates on which row the sample is positioned in the 96-well plate.
PLATE	Number used to distinguish samples scored on different 96-well plates.
DENSITY_1	Cell density (x107 cells/ml) at the first time point determined from the optical density at 620 nm measured with a Sunrise plate reader.
DENSITY_2	Cell density (x107 cells/ml) at the second time point determined from the optical density at 620 nm measured with a Sunrise plate reader.
DENSITY_3	Cell density (x107 cells/ml) at the third time point determined from the optical density at 620 nm measured with a Sunrise plate reader.
DENSITY_4	Cell density (x107 cells/ml) at the fourth time point determined from the optical density at 620 nm measured with a Sunrise plate reader.
COUNTS.INITIAL_1	Total number of events at the first time point recorded by flow cytometry.
COUNTS.INITIAL_2	Total number of events at the second time point recorded by flow cytometry.
COUNTS.INITIAL_3	Total number of events at the third time point recorded by flow cytometry.
COUNTS.INITIAL_4	Total number of events at the fourth time point recorded by flow cytometry.
COUNTS.COMPLETE_1	Number of events at the first time point with values of FSC.A, FSC.H, FL1.H and FL2.H different from zero.
COUNTS.COMPLETE_2	Number of events at the second time point with values of FSC.A, FSC.H, FL1.H and FL2.H different from zero.
COUNTS.COMPLETE_3	Number of events at the thrid time point with values of FSC.A, FSC.H, FL1.H and FL2.H different from zero.
COUNTS.COMPLETE_4	Number of events at the fourth time point with values of FSC.A, FSC.H, FL1.H and FL2.H different from zero.
Filtered.events_1	Number of events at the first time point after filtering out events with extreme values of forward scatter (FSC.A and FSC.H) and fluorescence (FL1.H and FL2.H).
Filtered.events_2	Number of events at the second time point after filtering out events with extreme values of forward scatter (FSC.A and FSC.H) and fluorescence (FL1.H and FL2.H).
Filtered.events_3	Number of events at the third time point after filtering out events with extreme values of forward scatter (FSC.A and FSC.H) and fluorescence (FL1.H and FL2.H).
Filtered.events_4	Number of events at the fourth time point after filtering out events with extreme values of forward scatter (FSC.A and FSC.H) and fluorescence (FL1.H and FL2.H).
YFP.events_1	Number of YFP events at the first time point.
YFP.events_2	Number of YFP events at the second time point.
YFP.events_3	Number of YFP events at the third time point.
YFP.events_4	Number of YFP events at the fourth time point.
GFP.events_1	Number of GFP events at the first time point.
GFP.events_2	Number of GFP events at the second time point.
GFP.events_3	Number of GFP events at the third time point.
GFP.events_4	Number of GFP events at the fourth time point.
YGFP.events_1	Number of events expressing both YFP and GFP at the first time point. These events correspond to doublets of two cells scored together, composed of one YFP cell and one GFP cell.
YGFP.events_2	Number of events expressing both YFP and GFP at the second time point. These events correspond to doublets of two cells scored together, composed of one YFP cell and one GFP cell.
YGFP.events_3	Number of events expressing both YFP and GFP at the third time point. These events correspond to doublets of two cells scored together, composed of one YFP cell and one GFP cell.
YGFP.events_4	Number of events expressing both YFP and GFP at the fourth time point. These events correspond to doublets of two cells scored together, composed of one YFP cell and one GFP cell.
N.YFP_1	Number of YFP cells at the first time point. This number was calculated by removing the number of doublets with two YFP cells from the total number of YFP events (YFP.events_1).
N.YFP_2	Number of YFP cells at the second time point. This number was calculated by removing the number of doublets with two YFP cells from the total number of YFP events (YFP.events_2).
N.YFP_3	Number of YFP cells at the third time point. This number was calculated by removing the number of doublets with two YFP cells from the total number of YFP events (YFP.events_3).
N.YFP_4	Number of YFP cells at the fourth time point. This number was calculated by removing the number of doublets with two YFP cells from the total number of YFP events (YFP.events_4).
N.GFP_1	Number of GFP cells at the first time point. This number was calculated by removing the number of doublets with two GFP cells from the total number of GFP events (GFP.events_1).
N.GFP_2	Number of GFP cells at the second time point. This number was calculated by removing the number of doublets with two GFP cells from the total number of GFP events (GFP.events_2).
N.GFP_3	Number of GFP cells at the third time point. This number was calculated by removing the number of doublets with two GFP cells from the total number of GFP events (GFP.events_3).
N.GFP_4	Number of GFP cells at the fourth time point. This number was calculated by removing the number of doublets with two GFP cells from the total number of GFP events (GFP.events_4).
N.noFP_1	Number of cell debris at the first time point. This is the difference between COUNTS.COMPLETE_1 and Filtered.events_1.
N.noFP_2	Number of cell debris at the second time point. This is the difference between COUNTS.COMPLETE_2 and Filtered.events_2.
N.noFP_3	Number of cell debris at the third time point. This is the difference between COUNTS.COMPLETE_3 and Filtered.events_3.
N.noFP_4	Number of cell debris at the fourth time point. This is the difference between COUNTS.COMPLETE_4 and Filtered.events_4.
Freq.YFP.events_1	YFP.events_1 divided by the sum of YFP.events_1 and GFP.events_1.
Freq.YFP.events_2	YFP.events_2 divided by the sum of YFP.events_2 and GFP.events_2.
Freq.YFP.events_3	YFP.events_3 divided by the sum of YFP.events_3 and GFP.events_3.
Freq.YFP.events_4	YFP.events_4 divided by the sum of YFP.events_4 and GFP.events_4.
Freq.GFP.events_1	GFP.events_1 divided by the sum of YFP.events_1 and GFP.events_1.
Freq.GFP.events_2	GFP.events_2 divided by the sum of YFP.events_2 and GFP.events_2.
Freq.GFP.events_3	GFP.events_3 divided by the sum of YFP.events_3 and GFP.events_3.
Freq.GFP.events_4	GFP.events_4 divided by the sum of YFP.events_4 and GFP.events_4.
Freq.YGFP.events_1	YGFP.events_1 divided by the sum of YFP.events_1, GFP.events_1 and YGFP.events_1.
Freq.YGFP.events_2	YGFP.events_2 divided by the sum of YFP.events_2, GFP.events_2 and YGFP.events_2.
Freq.YGFP.events_3	YGFP.events_3 divided by the sum of YFP.events_3, GFP.events_3 and YGFP.events_3.
Freq.YGFP.events_4	YGFP.events_4 divided by the sum of YFP.events_4, GFP.events_4 and YGFP.events_4.
Freq.YFP_1	N.YFP_1 divided by the sum of N.YFP_1 and N.GFP_1.
Freq.YFP_2	N.YFP_2 divided by the sum of N.YFP_2 and N.GFP_2.
Freq.YFP_3	N.YFP_3 divided by the sum of N.YFP_3 and N.GFP_3.
Freq.YFP_4	N.YFP_4 divided by the sum of N.YFP_4 and N.GFP_4.
Freq.GFP_1	N.GFP_1 divided by the sum of N.YFP_1 and N.GFP_1.
Freq.GFP_2	N.GFP_2 divided by the sum of N.YFP_2 and N.GFP_2.
Freq.GFP_3	N.GFP_3 divided by the sum of N.YFP_3 and N.GFP_3.
Freq.GFP_4	N.GFP_4 divided by the sum of N.YFP_4 and N.GFP_4.
Freq.noFP_1	N.noFP_1 divided by the sum of N.YFP_1, N.GFP_1 and N.noFP_1.
Freq.noFP_2	N.noFP_2 divided by the sum of N.YFP_2, N.GFP_2 and N.noFP_2.
Freq.noFP_3	N.noFP_3 divided by the sum of N.YFP_3, N.GFP_3 and N.noFP_3.
Freq.noFP_4	N.noFP_4 divided by the sum of N.YFP_4, N.GFP_4 and N.noFP_4.
G_1.2	Number of generations of growth between time points 1 and 2. Calculated from changes in cell density and dilution factors.
G_2.3	Number of generations of growth between time points 2 and 3. Calculated from changes in cell density and dilution factors.
G_3.4	Number of generations of growth between time points 3 and 4. Calculated from changes in cell density and dilution factors.
GP_1.2	Median number of generations for the whole plate between time points 1 and 2. Samples with strong fitness changes were excluded from this calculation.
GP_2.3	Median number of generations for the whole plate between time points 2 and 3. Samples with strong fitness changes were excluded from this calculation.
GP_3.4	Median number of generations for the whole plate between time points 3 and 4. Samples with strong fitness changes were excluded from this calculation.
DT_1.2	Median population doubling time for the whole plate between time points 1 and 2. Samples with strong fitness changes were excluded from this calculation.
DT_2.3	Median population doubling time for the whole plate between time points 2 and 3. Samples with strong fitness changes were excluded from this calculation.
DT_3.4	Median population doubling time for the whole plate between time points 3 and 4. Samples with strong fitness changes were excluded from this calculation.
log.ratio_1	Logarithm of YFP.events_1 divided by GFP.events_1.
log.ratio_2	Logarithm of YFP.events_2 divided by GFP.events_2.
log.ratio_3	Logarithm of YFP.events_3 divided by GFP.events_3.
log.ratio_4	Logarithm of YFP.events_4 divided by GFP.events_4.
log.N_1	Logarithm of N.YFP_1 divided by N.GFP_1.
log.N_2	Logarithm of N.YFP_2 divided by N.GFP_2.
log.N_3	Logarithm of N.YFP_3 divided by N.GFP_3.
log.N_4	Logarithm of N.YFP_4 divided by N.GFP_4.
w.estimate	Fitness relative to the GFP competitor (YPW1160) and calculated from the linear regression of log.ratio_1 to log.ratio_4 on the number of generations (0 to GP_1.2 + GP_2.3 + GP_3.4).
F.test	P-value of a F-test used to test the linearity of the relationship between log.ratio_1 to log.ratio_4 and the number of generations. P-values below 0.05 indicate that the relationship is significantly linear.
w.estimate.2	Fitness relative to the GFP competitor (YPW1160) and calculated from the linear regression of log.N_1 to log.N_2 on the number of generations (0 to GP_1.2 + GP_2.3 + GP_3.4).
F.test.2	P-value of a F-test used to test the linearity of the relationship between log.N_1 to log.N_4 and the number of generations. P-values below 0.05 indicate that the relationship is significantly linear.
Fitness	Relative fitness calculated by dividing the value of w.estimate.2 for the tested strain by the mean value of w.estimate.2 for the reference strain YPW1189 (if tested strain has ura3d0 deletion) or YPW2682 (if tested strain has a functional URA3 allele).
Dataset 4
Expression data of all replicate populations to compare the activity of 20 PTDH3 alleles driving expression of YFP at the HO locus to the activity of the same alleles driving expression of TDH3-YFP at the native TDH3 locus.
This dataset was used to generate Figure 2 - figure supplement 1 - Source Data 1.
Headers	Description
ID	Unique identifier for each strain.
STRAIN	Name of yeast strain carrying the corresponding PTDH3 allele(s) at the HO locus or at the native TDH3 locus.
MUTATION	Arbitrary name referring to the mutation(s) carried by the PTDH3 allele.
CLONE	Number used to distinguish independent colonies from the same transformation.
YFP.CONSTRUCT	Indicates whether the PTDH3 allele is inserted at the native locus ("FUSION") or at the HO locus ("HO").
DAY	Number used to distinguish samples scored on different days.
REP	Number used to distinguish different replicate populations of the same genotype.
PLATE	Number used to distinguish samples scored on different 96-well plates.
ROW	Indicates on which row the sample is positioned in the 96-well plate.
COL	Indicates on which column the sample is positioned in the 96-well plate.
POSITION	Position of the sample in the 96-well plate.
BLOCK	Number used to distinguish samples that were scored on different flow cytometry runs for each plate.
STACK	Position of the plate in the incubator.
DEPTH	Vertical position of the plate in the STACK. 1 corresponds to the top position and 4 to the bottom.
ORDER	Order in which the plates were run on the flow cytometer.
FLOW.RUN	Number used to distinguish samples that were scored on different flow cytometry runs across the whole experiment.
BLOCKxROW	Row number in each BLOCK.
COUNTS.INITIAL	Total number of events recorded by flow cytometry.
COUNTS.GATES	Number of events after filtering out events with extreme values of forward scatter (cell size).
COUNTS.SINGLES	Number of events after filtering out doublets, corresponding to two cells recorded at the same time or to budding cells.
COUNTS.FINAL	Final number of events after filtering out events with aberrant fluorescence levels.
FSC.KURTOSIS	Kurtosis (fourth moment) of the forward scatter area (FSC.A) among all cells.
WIDTH	Average width of flow events.
FSC.MEDIAN.INITIAL	Median value of logFSC.A before data transformation.
FSC.MAD.INITIAL	Median absolute deviation (MAD) of logFSC.A before data transformation.
FL1.MEDIAN.INITIAL	Median value of fluorescence (logFL1.A) before data transformation.
FL1.MAD.INITIAL	Median absolute deviation (MAD) of fluorescence (logFL1.A) before data transformation.
YFP.MEDIAN.INITIAL	Median value of logFL1.A divided by logFSC.A before data transformation.
YFP.MAD.INITIAL	Median absolute deviation (MAD) of logFL1.A divided by logFSC.A before data transformation.
YFP.SD.INITIAL	Standard deviation of logFL1.A divided by logFSC.A before data transformation.
INTERCEPT.INITIAL	Intercept of the linear regression of logFL1.A on logFSC.A.
SLOPE.INITIAL	Regression coefficient of the linear regression of logFL1.A on logFSC.A.
THETA	Radian measure of the angle of rotation used to transform logFL1.A and logFSC.A data.
YFP.MEDIAN.ROT	Median value of logFL1.A divided by logFSC.A after applying the rotation.
YFP.MAD.ROT	Median absolute deviation (MAD) of logFL1.A divided by logFSC.A after applying the rotation.
YFP.SD.ROT	Standard deviation of logFL1.A divided by logFSC.A after applying the rotation.
FSC.MEDIAN.FINAL	Median value of logFSC.A before data after applying the rotation.
FSC.MAD.FINAL	Median absolute deviation (MAD) of logFSC.A after applying the rotation.
YFP.MEDIAN.FINAL	Median value of logFL1.A divided by logFSC.A before after applying the transformation for linear scaling with mRNA level.
YFP.MAD.FINAL	Median absolute deviation of logFL1.A divided by logFSC.A before after applying the transformation for linear scaling with mRNA level.
YFP.SD.FINAL	Standard deviation of logFL1.A divided by logFSC.A before after applying the transformation for linear scaling with mRNA level.
log.YFP.MEDIAN	Median value of the logarithm of logFL1.A divided by logFSC.A before after applying the transformation for linear scaling with mRNA level.
log.YFP.MAD	Median absolute deviation of the logarithm of logFL1.A divided by logFSC.A before after applying the transformation for linear scaling with mRNA level.
log.YFP.SD	Standard deviation of the logarithm of logFL1.A divided by logFSC.A before after applying the transformation for linear scaling with mRNA level.
log.RNA.MEDIAN	Transformed value of YFP.MEDIAN.FINAL used to correct for FLOW.RUN and ROW effects.
log.RNA.SD	Transformed value of YFP.SD.FINAL used to correct for FLOW.RUN and ROW effects.
FSC.MEDIAN.CORRECT	FSC.MEDIAN.FINAL corrected for FLOW.RUN and ROW effects.
log.RNA.MEDIAN.CORRECT	log.RNA.MEDIAN corrected for FLOW.RUN and ROW effects.
YFP.MEDIAN.CORRECT	log.RNA.MEDIAN.CORRECT transformed back on the same scale as YFP.MEDIAN.FINAL.
log.RNA.SD.CORRECT	log.RNA.SDcorrected for FLOW.RUN and ROW effects.
YFP.SD.CORRECT	log.RNA.SD.CORRECT transformed back on the same scale as YFP.SD.FINAL.
HO.MEDIAN.ADJUST	YFP.MEDIAN.CORRECT substracted by the mean value of YFP.MEDIAN.CORRECT for the non-fluorescent strain YPW978 (correction for autofluorescence).
HO.SD.ADJUST	YFP.SD.CORRECT substracted by the mean value of YFP.SD.CORRECT for the non-fluorescent strain YPW978 (correction for autofluorescence).
HO.MEDIAN.RELATIVE	HO.MEDIAN.ADJUST divided by the mean value of HO.MEDIAN.ADJUST for the reference strain with the wild-type allele of PTDH3 inserted at HO.
HO.SD.SCALED	HO.SD.ADJUST divided by the mean value of HO.MEDIAN.ADJUST for the reference strain with the wild-type allele of PTDH3 inserted at HO.
HO.CV	HO.SD.SCALED divided by HO.MEDIAN.RELATIVE.
HO.FANO	Squared HO.SD.SCALED divided by HO.MEDIAN.RELATIVE.
HO.LOG.CV	Logarithm of HO.SD.SCALED divided by HO.MEDIAN.RELATIVE.
HO.SD.RELATIVE	HO.SD.SCALED divided by the mean value of HO.SD.SCALED for the reference strain with the wild-type allele of PTDH3 inserted at HO.
HO.CV.RELATIVE	HO.CV divided by the mean value of HO.CV for the reference strain with the wild-type allele of PTDH3 inserted at HO.
HO.FANO.RELATIVE	HO.FANO divided by the mean value of HO.FANO for the reference strain with the wild-type allele of PTDH3 inserted at HO.
HO.LOG.CV.RELATIVE	HO.LOG.CV divided by the mean value of HO.LOG.CV for the reference strain with the wild-type allele of PTDH3 inserted at HO.
NATIVE.MEDIAN.ADJUST	YFP.MEDIAN.CORRECT substracted by the mean value of YFP.MEDIAN.CORRECT for the non-fluorescent strain YPW978 (correction for autofluorescence).
NATIVE.SD.ADJUST	YFP.SD.CORRECT substracted by the mean value of YFP.SD.CORRECT for the non-fluorescent strain YPW978 (correction for autofluorescence).
NATIVE.MEDIAN.RELATIVE	NATIVE.MEDIAN.ADJUST divided by the mean value of NATIVE.MEDIAN.ADJUST for the reference strain with the wild-type allele of PTDH3 inserted at the native TDH3 locus.
NATIVE.SD.SCALED	NATIVE.SD.ADJUST divided by the mean value of NATIVE.MEDIAN.ADJUST for the reference strain with the wild-type allele of PTDH3 inserted at the native TDH3 locus.
NATIVE.CV	NATIVE.SD.SCALED divided by NATIVE.MEDIAN.RELATIVE.
NATIVE.FANO	Squared NATIVE.SD.SCALED divided by NATIVE.MEDIAN.RELATIVE.
NATIVE.LOG.CV	Logarithm of NATIVE.SD.SCALED divided by NATIVE.MEDIAN.RELATIVE.
NATIVE.SD.RELATIVE	NATIVE.SD.SCALED divided by the mean value of NATIVE.SD.SCALED for the reference strain with the wild-type allele of PTDH3 inserted at the native TDH3 locus.
NATIVE.CV.RELATIVE	NATIVE.CV divided by the mean value of NATIVE.CV for the reference strain with the wild-type allele of PTDH3 inserted at the native TDH3 locus.
NATIVE.FANO.RELATIVE	NATIVE.FANO divided by the mean value of NATIVE.FANO for the reference strain with the wild-type allele of PTDH3 inserted at the native TDH3 locus.
NATIVE.LOG.CV.RELATIVE	NATIVE.LOG.CV divided by the mean value of NATIVE.LOG.CV for the reference strain with the wild-type allele of PTDH3 inserted at the native TDH3 locus.
Dataset 5
Results of the direct competition assays for each individual sample.
Genotype frequencies were quantified by pyrosequencing at 4 time points separated by 24 h of growth in YPD medium.
This dataset was used to generate Figure 4 - Source Data 1.
Headers	Description
SORT	Number used to sort samples.
POSITION	Position in the 96-well plate.
ROW	Indicates on which row the sample is positioned in the 96-well plate.
COLUMN	Indicates on which column the sample is positioned in the 96-well plate.
PAIR	Unique identifier for the pair of genotypes competed against each other.
UNIQUE.PAIR	Unique identifier for the pair of strains competed against each other. Pairs with the same letter but a different number share the same genotypes but are independent colonies coming from the same transformation.
STRAIN.1	Name of the first strain of the pair with the highest level of expression noise.
STRAIN.2	Name of the second strain of the pair with the lowest level of expression noise.
MUT.1	Arbitrary name for the mutation(s) found in the PTDH3 allele of STRAIN.1.
MUT.2	Arbitrary name for the mutation(s) found in the PTDH3 allele of STRAIN.2.
PYRO	Name of the mutation genotyped by pyrosequencing.
ALLELE.1	Nucleotide found in STRAIN.1 at the position genotyped by pyrosequencing.
ALLELE.2	Nucleotide found in STRAIN.2 at the position genotyped by pyrosequencing.
FREQ.ALLELE.1_T1	Frequency of ALLELE.1 measured by pyrosequencing at time point 1.
FREQ.ALLELE.1_T2	Frequency of ALLELE.1 measured by pyrosequencing at time point 2.
FREQ.ALLELE.1_T3	Frequency of ALLELE.1 measured by pyrosequencing at time point 3.
FREQ.ALLELE.1_T4	Frequency of ALLELE.1 measured by pyrosequencing at time point 4.
QUALITY_T1	Quality of sequencing at time point 1 as determined by the pyrosequencing software.
QUALITY_T2	Quality of sequencing at time point 2 as determined by the pyrosequencing software.
QUALITY_T3	Quality of sequencing at time point 3 as determined by the pyrosequencing software.
QUALITY_T4	Quality of sequencing at time point 4 as determined by the pyrosequencing software.
OD620.T_T1	Optical density at 620 nm measured on a Sunrise plate reader before dilution at time point 1.
OD620.T_T2	Optical density at 620 nm measured on a Sunrise plate reader before dilution at time point 2.
OD620.T_T3	Optical density at 620 nm measured on a Sunrise plate reader before dilution at time point 3.
OD620.T_T4	Optical density at 620 nm measured on a Sunrise plate reader before dilution at time point 4.
OD620.I_T1	Optical density at 620 nm measured on a Sunrise plate reader before dilution 12 hours after time point 1.
OD620.I_T2	Optical density at 620 nm measured on a Sunrise plate reader before dilution 12 hours after time point 2.
OD620.I_T3	Optical density at 620 nm measured on a Sunrise plate reader before dilution 12 hours after time point 3.
OD620.I_T4	Optical density at 620 nm measured on a Sunrise plate reader before dilution 12 hours after time point 4.
VOL.T_T1	Volume of cell culture in microliter diluted in 0.5 ml of YPD medium at time point 1.
VOL.T_T2	Volume of cell culture in microliter diluted in 0.5 ml of YPD medium at time point 2.
VOL.T_T3	Volume of cell culture in microliter diluted in 0.5 ml of YPD medium at time point 3.
VOL.T_T4	Volume of cell culture in microliter diluted in 0.5 ml of YPD medium at time point 4.
VOL.I_T1	Volume of cell culture in microliter diluted in 0.5 ml of YPD medium 12 hours after time point 1.
VOL.I_T2	Volume of cell culture in microliter diluted in 0.5 ml of YPD medium 12 hours after time point 2.
VOL.I_T3	Volume of cell culture in microliter diluted in 0.5 ml of YPD medium 12 hours after time point 3.
VOL.I_T4	Volume of cell culture in microliter diluted in 0.5 ml of YPD medium 12 hours after time point 4.
DENSITY.T_T1	Cell density (x107 cells/ml) obtained from OD620.T_T1.
DENSITY.T_T2	Cell density (x107 cells/ml) obtained from OD620.T_T2.
DENSITY.T_T3	Cell density (x107 cells/ml) obtained from OD620.T_T3.
DENSITY.T_T4	Cell density (x107 cells/ml) obtained from OD620.T_T4.
DENSITY.I_T1	Cell density (x107 cells/ml) obtained from OD620.I_T1.
DENSITY.I_T2	Cell density (x107 cells/ml) obtained from OD620.I_T2.
DENSITY.I_T3	Cell density (x107 cells/ml) obtained from OD620.I_T3.
DENSITY.I_T4	Cell density (x107 cells/ml) obtained from OD620.I_T4.
G.T_T1	Number of generations between time point 1 and time point 1.
G.I_T1	Number of generations between time point 1 and 12 hours after time point 1.
G.T_T2	Number of generations between time point 1 and time point 2.
G.I_T2	Number of generations between time point 1 and 12 hours after time point 2.
G.T_T3	Number of generations between time point 1 and time point 3.
G.I_T3	Number of generations between time point 1 and 12 hours after time point 3.
G.T_T4	Number of generations between time point 1 and time point 4.
G.I_T4	Number of generations between time point 1 and 12 hours after time point 4.
W.ESTIMATE	Fitness of STRAIN.1 (high noise) relative to STRAIN.2 (low noise).
F.TEST	P-value of a F-test used to test the linearity of the relationship between FREQ.ALLELE.1_T1 to FREQ.ALLELE.1_T4 and the number of generations. P-values below 0.05 indicate that the relationship is significantly linear.
Dataset 6
Frequency of spontaneous loss of a TDH3 copy by intrachromosomal homologous recombination.
Headers	Description
STRAIN	Name of the strain tested.
GENOTYPE	Loss frequency of a TDH3 copy was tested in the strain with a TDH3-URA3-TDH3 genotype, while the strain with a TDH3-URA3 genotype was used as a control for URA3 loss in absence of a tandem repeat of TDH3.
REPLICATE	Unique number for each replicate population of the same strain.
TIME.POINT	Time point when the frequency of [Ura-] colonies was quantified. Consecutive time points were separated by 24 hours of growth in YPD medium.
DENSITY	Cell density of the population at the time it was plated on SC + 5-FOA medium. Cell density was calculated from the optical density measured on a spectrophotometer at 660 nm.
URA3.NEGATIVE.COLONIES	Number of colonies growing on SC + 5-FOA medium.
URA3.NEGATIVE.FREQUENCY	Frequency of colonies growing on SC + 5-FOA medium calculated from the number of colonies and from the cell density when plated.

## Sheet: Dataset 1
WELL	VARIANT.ID	STRAIN.1	STRAIN.2	CLASS	YFP.COPY	POSITION1.C	POSITION2.T	POSITION3.G	POSITION4.A	POSITION5.T	POSITION6.G	POSITION7.C	POSITION8.A	POSITION9.T	FREQ5.T	FREQ8.A	YFP.PYRO	YFP.CORRECTED
A1	Var0	YPW978	EMPTY	DNA	0	0.29	32.18	60.05	35.42	6.27	3.34	51.87	31.95	33.04	0.652445	0.467676	0.56006	0.598234
A2	Var0	YPW978	YPW1182	DNA	0	0.26	47.86	46.21	54.87	0.62	44.25	0.72	2.25	44.18	0.0138177	0.0425323	0.028175	0.000992197
A3	Var27	YPW2816	YPW1182	DNA	1	0.07	53.58	51.16	58.67	25.27	26.87	0.36	27.72	25.02	0.484657	0.502931	0.493794	0.528445
A4	Var14	YPW2475	YPW1182	DNA	1	0.28	43.37	42.92	47.22	20.21	22.28	0.36	22.52	20.2	0.475641	0.505918	0.490779	0.525236
A5	Var21	YPW2566	YPW1182	DNA	1	0.15	44.47	43.43	49.76	21.32	22.57	0.1	23.97	21.42	0.48576	0.50002	0.49289	0.527483
A6	Var4	YPW1897	YPW1182	DNA	1	0.3	33.98	35.95	40.37	15.68	18.23	2.23	19.35	18.54	0.4624	0.467657	0.465029	0.497698
A7	Var1.1	YPW1002	EMPTY	DNA	1	0.1	24.72	24.59	30.61	24.27	0.7	0.05	27.26	0.79	0.971966	0.965358	0.968662	1.00299
A8	Var1.1	YPW1002	YPW1182	DNA	1	0.25	41.21	43.36	54.13	20.74	22.61	0.21	24.44	22.55	0.478431	0.452092	0.465262	0.497948
A9	Var1.2	YPW2676	YPW1182	DNA	1	0.22	46.76	46.28	58.07	30.01	18.02	0.2	34.03	17.8	0.624818	0.606213	0.615516	0.655587
A10	Var36	YPW2671	YPW1182	DNA	2	0.38	59.51	60.86	72.57	53.41	9.15	0.22	57.83	9.12	0.85374	0.838706	0.846223	0.885489
A11	NA	YPW2683	EMPTY	DNA	1	0.34	46.57	45.2	52.6	21.64	24.17	0.19	23.43	22.85	0.472386	0.475845	0.474116	0.507442
A12	NA	YPW2725	EMPTY	DNA	2	0.25	57.5	54.96	67.7	44.39	14	0.42	50.57	13.73	0.760233	0.757767	0.759	0.800053
C1	Var0	YPW978	EMPTY	RNA	0	0.19	41.38	79.84	71.5	14.47	20.52	25.14	36.68	41.66	0.413547	0.337555	0.375551	0.399943
C2	Var0	YPW978	YPW1182	RNA	0	0.32	56.14	54.54	67.03	1.52	53.33	1.01	3.84	52.93	0.0277119	0.0572815	0.0424967	0.0176895
C3	Var27	YPW2816	YPW1182	RNA	1	0.18	68.73	71.9	85.23	2.03	62.93	5.07	10.63	60.01	0.03125	0.12499	0.0781202	0.0592239
C4	Var14	YPW2475	YPW1182	RNA	1	0.19	77.48	82.35	97.1	7.53	70.68	1.02	12.85	67.24	0.0962792	0.132315	0.114297	0.101366
C5	Var21	YPW2566	YPW1182	RNA	1	0.27	78.47	83.82	93.11	9.92	68.49	1.64	15.35	60.59	0.126514	0.175943	0.151229	0.144297
C6	Var4	YPW1897	YPW1182	RNA	1	0.21	80.15	85.24	97.77	27.15	54.82	1.22	32.57	51.21	0.331219	0.342705	0.336962	0.356877
C7	Var1.1	YPW1002	EMPTY	RNA	1	0.23	73.11	75.22	84.46	70.26	3.45	1.14	76.07	2.11	0.953195	0.968951	0.961073	0.995774
C8	Var1.1	YPW1002	YPW1182	RNA	1	0.15	80.97	83.46	91.51	38.78	42.55	0.98	43.58	38.49	0.476823	0.500458	0.48864	0.522957
C9	Var1.2	YPW2676	YPW1182	RNA	1	-0.13	87.38	87.32	96.38	51.76	34.37	0.38	56.64	30.39	0.600952	0.628216	0.614584	0.654631
C10	Var36	YPW2671	YPW1182	RNA	2	0.24	61.8	56.36	71.15	54.38	9.36	0.54	58.37	8.47	0.853153	0.856852	0.855003	0.894002
C11	NA	YPW2683	EMPTY	RNA	1	-0.1	71.89	63.58	82.04	37.79	32.78	0.09	41.14	31.26	0.535497	0.535583	0.53554	0.572575
C12	NA	YPW2725	EMPTY	RNA	2	0.34	59.38	58.3	66.99	47.49	11.14	0.57	51.25	10.22	0.809995	0.816346	0.81317	0.853302
E1	Var0	YPW978	EMPTY	DNA	0	-0.01	16.1	15.77	30.5	0.19	15.59	3.1	14.88	7.96	0.0120406	0.49667	0.254356	0.263229
E2	Var0	YPW978	YPW1182	DNA	0	0.14	40.91	40.92	44.91	0.44	37.84	0.33	2.13	36.82	0.0114943	0.0500586	0.0307764	0.00402488
E3	Var27	YPW2816	YPW1182	DNA	1	-0.09	30	30.03	33.75	13.68	15.58	-0.07	15.2	14.66	0.467532	0.479609	0.473571	0.506858
E4	Var14	YPW2475	YPW1182	DNA	1	0.21	37.43	37.96	42.31	17.41	19.83	0.23	18.95	18.05	0.467508	0.481535	0.474522	0.507877
E5	Var21	YPW2566	YPW1182	DNA	1	0.19	50.63	50.4	60.88	23.43	25.17	0.94	27.46	25.2	0.482099	0.475401	0.47875	0.5124
E6	Var4	YPW1897	YPW1182	DNA	1	0.34	40.94	41.58	45.65	18.69	21.56	0.39	20.06	19.96	0.464348	0.474049	0.469198	0.502173
E7	Var1.1	YPW1002	EMPTY	DNA	1	0.04	22.64	23.34	25.25	21.07	0.86	0.12	21	0.99	0.960784	0.950049	0.955417	0.990392
E8	Var1.1	YPW1002	YPW1182	DNA	1	0.2	52.66	53.87	62.66	25.19	27.69	0.31	28.25	27.15	0.476362	0.466513	0.471437	0.504573
E9	Var1.2	YPW2676	YPW1182	DNA	1	0.24	41.71	38.84	51.11	25.96	14.68	0.22	29.43	15.42	0.63878	0.609	0.62389	0.66417
E10	Var36	YPW2671	YPW1182	DNA	2	0.18	61.05	57.22	73.06	50.35	8.44	0.37	58	9.15	0.856438	0.841189	0.848814	0.888002
E11	NA	YPW2683	EMPTY	DNA	1	0.13	19.68	18.8	23.22	8.83	10	0.36	10.22	10.05	0.468933	0.462909	0.465921	0.498656
E12	NA	YPW2725	EMPTY	DNA	2	0.21	36.59	35.18	43.41	28.39	9.05	0.34	31.94	9.03	0.75828	0.748832	0.753556	0.794666
F1	Var0	YPW978	EMPTY	RNA	0	0.23	25.48	51.47	58.93	0.37	25.04	4.13	30.66	2.32	0.0145612	0.85106	0.43281	0.462869
F2	Var0	YPW978	YPW1182	RNA	0	0.27	85.87	86.74	101.05	0.98	86.37	0.18	4.03	83.03	0.0112192	0.0396116	0.0254154	-0.00222472
F3	Var27	YPW2816	YPW1182	RNA	1	0.32	54.8	57.86	70.7	2.96	54.9	0.38	5.18	54.07	0.051158	0.0691236	0.0601408	0.0382627
F4	Var14	YPW2475	YPW1182	RNA	1	0.31	80.33	79.87	94.91	7.81	73.47	0.14	10.15	69.6	0.0960876	0.109869	0.102978	0.0881884
F5	Var21	YPW2566	YPW1182	RNA	1	0.24	76.91	72.27	89.19	11.14	62.66	0.42	13.15	61.64	0.150949	0.155379	0.153164	0.146542
F6	Var4	YPW1897	YPW1182	RNA	1	0.14	88.81	83.06	95.79	27.28	55.19	0.28	29.47	53.01	0.330787	0.340118	0.335453	0.355183
F7	Var1.1	YPW1002	EMPTY	RNA	1	0.26	71.22	69.57	82.52	71.74	1.25	0.22	77.83	1.36	0.982874	0.980155	0.981515	1.0152
F8	Var1.1	YPW1002	YPW1182	RNA	1	0.47	87.98	86.84	98.34	40.83	43.22	3.41	46.95	40.16	0.485782	0.511221	0.498501	0.53345
F9	Var1.2	YPW2676	YPW1182	RNA	1	0.14	79.91	80.91	87.78	49.86	29.72	0.53	53.58	26.83	0.626539	0.645135	0.635837	0.67638
F10	Var36	YPW2671	YPW1182	RNA	2	0.25	83.98	82.62	90.83	70.19	12.04	0.41	75.41	11.17	0.853581	0.861916	0.857749	0.896662
F11	NA	YPW2683	EMPTY	RNA	1	0.22	77.84	79.06	86.9	42.57	36.73	0.42	46.47	34.22	0.536822	0.548818	0.54282	0.580213
F12	NA	YPW2725	EMPTY	RNA	2	0.19	82.65	83.62	93.89	67.45	15.73	0.3	76.76	15.7	0.810892	0.811458	0.811175	0.851352
G1	Var0	YPW978	EMPTY	RNA	0	0.29	15.24	15.23	2.27	13.77	1.09	0.8	30	1.58	0.926649	0.992216	0.959433	0.994213
G2	Var0	YPW978	YPW1182	RNA	0	0.23	78.23	76.99	95.03	2.02	77.07	1.09	4.21	79.67	0.0255405	0.0416876	0.0336141	0.00733302
G3	Var27	YPW2816	YPW1182	RNA	1	0.3	63.73	64.95	77.78	2.61	64.61	0.65	5	61.98	0.0388277	0.0620007	0.0504142	0.0269214
G4	Var14	YPW2475	YPW1182	RNA	1	0.21	78.93	80.49	98.81	7.85	74.39	0.42	10.51	74.17	0.0954523	0.101682	0.0985673	0.0830507
G5	Var21	YPW2566	YPW1182	RNA	1	0.13	78.23	80.35	91.18	11.48	67.53	0.58	15.15	63.44	0.145298	0.17005	0.157674	0.151775
G6	Var4	YPW1897	YPW1182	RNA	1	0.32	82.53	84.74	94.13	27.17	56.46	0.44	30.57	52.51	0.324883	0.337937	0.33141	0.350643
G7	Var1.1	YPW1002	EMPTY	RNA	1	0.19	85.6	86.62	101.38	85.23	1.87	0.31	94.05	1.82	0.97853	0.977595	0.978063	1.01192
G8	Var1.1	YPW1002	YPW1182	RNA	1	0.22	88.82	88.63	98.19	41.38	46.95	0.67	46.02	41.99	0.468471	0.497838	0.483154	0.517106
G9	Var1.2	YPW2676	YPW1182	RNA	1	0.09	74.77	78.94	85.1	39.02	25.04	20.28	53.93	32.48	0.609116	0.593307	0.601212	0.640881
G10	Var36	YPW2671	YPW1182	RNA	2	0.29	82.82	80.56	92.8	70.35	12.62	0.23	76.47	12.27	0.847897	0.847608	0.847753	0.886973
G11	NA	YPW2683	EMPTY	RNA	1	0.07	84.7	76.21	96.14	44.31	37.7	0.27	49.18	37.58	0.5403	0.535521	0.537911	0.575064
G12	NA	YPW2725	EMPTY	RNA	2	0.26	82.71	80.44	96.89	68.99	15.68	0.46	76.36	15.88	0.81481	0.804107	0.809459	0.849674
H1	Var0	YPW978	EMPTY	DNA	0	0.26	21.12	55.62	1.5	22.53	1.42	0.33	49.59	0.63	0.94071	0.999099	0.969904	1.00417
H2	Var0	YPW978	YPW1182	DNA	0	0.34	85.31	86.09	100.97	0.98	85.31	0.1	3.59	79.67	0.0113571	0.0366758	0.0240164	-0.00385551
H3	Var27	YPW2816	YPW1182	DNA	1	0.19	50.72	50.63	60.26	25.62	27.03	0.3	29.45	25.89	0.48661	0.489124	0.487867	0.522133
H4	Var14	YPW2475	YPW1182	DNA	1	0.34	48.57	46.02	57.94	22.97	25.34	0.28	26.72	23.97	0.475471	0.483058	0.479265	0.51295
H5	Var21	YPW2566	YPW1182	DNA	1	0.26	81.88	80.05	92.99	40.64	41.36	0.48	45.26	39.85	0.49561	0.500016	0.497813	0.532719
H6	Var4	YPW1897	YPW1182	DNA	1	0.4	78.76	70.94	90.61	36.54	39.72	0.38	40.3	40.31	0.47915	0.464956	0.472053	0.505233
H7	Var1.1	YPW1002	EMPTY	DNA	1	0.14	41.53	39.92	50.77	40.44	0.99	0.5	46.67	1.19	0.976104	0.969771	0.972938	1.00705
H8	Var1.1	YPW1002	YPW1182	DNA	1	0.44	76.04	72.29	94.66	37.58	38.63	0.33	44.26	40.16	0.493111	0.469582	0.481347	0.515175
H9	Var1.2	YPW2676	YPW1182	DNA	1	0.33	74.88	77.31	92.89	49.61	30.06	0.3	55.6	30.01	0.622694	0.598958	0.610826	0.650772
H10	Var36	YPW2671	YPW1182	DNA	2	0.17	57.22	58.35	69.63	50.15	8.94	0.27	57.35	9.16	0.848705	0.837267	0.842986	0.882347
H11	NA	YPW2683	EMPTY	DNA	1	0.39	62.81	64.35	71.63	29.39	35.48	0.36	32.71	32.74	0.45306	0.466969	0.460015	0.492307
H12	NA	YPW2725	EMPTY	DNA	2	0.14	30.07	30.45	34.43	22.78	7.6	0.18	25.56	6.86	0.749835	0.764934	0.757385	0.798455

## Sheet: Dataset 2
ID	STRAIN	MUTATION	CLONE	YFP.CONSTRUCT	DAY	REP	PLATE	ROW	COL	POSITION	BLOCK	STACK	DEPTH	ORDER	FLOW.RUN	BLOCKxROW	COUNTS.INITIAL	COUNTS.GATES	COUNTS.SINGLES	COUNTS.FINAL	FSC.KURTOSIS	WIDTH	FSC.MEDIAN.INITIAL	FSC.MAD.INITIAL	FL1.MEDIAN.INITIAL	FL1.MAD.INITIAL	YFP.MEDIAN.INITIAL	YFP.MAD.INITIAL	YFP.SD.INITIAL	INTERCEPT.INITIAL	SLOPE.INITIAL	THETA	YFP.MEDIAN.ROT	YFP.MAD.ROT	YFP.SD.ROT	FSC.MEDIAN.FINAL	FSC.MAD.FINAL	YFP.MEDIAN.FINAL	YFP.MAD.FINAL	YFP.SD.FINAL	log.YFP.MEDIAN	log.YFP.MAD	log.YFP.SD	log.RNA.MEDIAN	log.RNA.SD	FSC.MEDIAN.CORRECT	log.RNA.MEDIAN.CORRECT	YFP.MEDIAN.CORRECT	log.RNA.SD.CORRECT
CTRL	YPW1002	REF	1	SINGLE	1	1	1	A	1	A01	1	1	1	1	1	1	20320	18187	7684	7633	0.175241	51	5.48493	0.097294	4.98128	0.128787	0.907103	0.0186597	0.0170833	0.893781	0.00242881	0.0024288	0.907085	0.0186442	0.0170819	5.48491	0.09728	0.891991	0.0571087	0.052836	-0.114299	0.064035	0.0587579	0.0141587	0.134714	5.48491	0.0485685	0.905722	0.119813
21	YPW1897	m66	1	SINGLE	1	1	1	A	2	A02	1	1	1	1	1	1	16537	15185	6781	6678	0.125596	50	5.47506	0.0982772	4.63311	0.155603	0.844909	0.0232973	0.0231619	0.716106	0.0235254	0.023521	0.844362	0.023362	0.0230671	5.47502	0.0981322	0.73994	0.0436784	0.0437597	-0.301186	0.0592745	0.0584648	-0.476338	0.182212	5.47502	-0.441928	0.748348	0.167311
13	YPW2656	TATA.135	1	SINGLE	1	1	1	A	3	A03	1	1	1	1	1	1	15003	13712	6062	6003	0.207744	50	5.47801	0.0996995	4.21977	0.138761	0.770056	0.0199833	0.0185268	0.622265	0.026979	0.0269725	0.769562	0.0197758	0.0183615	5.47801	0.0998723	0.633585	0.020546	0.019369	-0.456362	0.0324613	0.0304059	-1.06127	0.144758	5.47801	-1.02686	0.638269	0.129857
1	YPW1617	WT	1	SINGLE	1	1	1	A	4	A04	1	1	1	1	1	1	13288	12227	5149	5090	0.143228	50	5.47383	0.0999295	5.05302	0.120978	0.921524	0.0165596	0.0155194	1.0041	-0.0150853	-0.0150841	0.921781	0.0164936	0.0154571	5.47398	0.0997558	0.939755	0.0564767	0.0537358	-0.0621363	0.0601748	0.056686	0.129077	0.122134	5.47398	0.163487	0.955158	0.107233
CTRL	YPW1002	REF	1	SINGLE	1	1	1	A	5	A05	1	1	1	1	1	1	12315	11194	4807	4764	0.284366	50	5.48383	0.101295	4.96446	0.130491	0.903842	0.0191522	0.0178012	0.889121	0.00268447	0.00268447	0.903814	0.0191811	0.0177994	5.48379	0.101179	0.882085	0.0569489	0.0535881	-0.125467	0.064792	0.0602761	-0.0114226	0.140172	5.48379	0.0229871	0.895469	0.125271
32	YPW2828	m75.m63.TATA.22	1	SINGLE	1	1	1	A	7	A07	1	1	1	1	1	1	12737	9717	3981	3833	0.166364	50	5.48114	0.103007	2.90795	0.313284	0.530213	0.0554436	0.0599962	0.78895	-0.0472049	-0.0471699	0.530789	0.0557203	0.0598881	5.48145	0.10315	0.520462	0.0089798	0.00906737	-0.653039	0.0172561	0.0173125	-2.92848	0.438466	5.48145	-2.89407	0.521186	0.423565
24	YPW1901	m90	1	SINGLE	1	1	1	A	8	A08	1	1	1	1	1	1	13124	12081	5172	5096	0.259462	50	5.47647	0.096088	4.80397	0.12476	0.876033	0.0173151	0.0164953	0.831927	0.00805357	0.0080534	0.875841	0.0172389	0.0164796	5.47625	0.0960167	0.806971	0.0410736	0.0401485	-0.214468	0.0511593	0.0492785	-0.230173	0.130697	5.47625	-0.195763	0.817725	0.115795
CTRL	YPW1002	REF	1	SINGLE	1	1	1	A	9	A09	1	1	1	1	1	1	11402	10422	4597	4557	0.356641	50	5.47557	0.101249	4.97175	0.123178	0.907101	0.0172093	0.0161029	0.910601	-0.000639159	-0.000639159	0.907091	0.0171954	0.0161028	5.47558	0.101247	0.892009	0.0529316	0.049896	-0.114279	0.0591631	0.0554554	0.0142039	0.127212	5.47558	0.0486136	0.90574	0.112311
19	YPW1898	m75	1	SINGLE	1	1	1	A	10	A10	1	1	1	1	1	1	13468	12083	5296	5209	0.314458	50	5.47185	0.0998922	4.31454	0.165484	0.787972	0.0256637	0.0256442	0.646646	0.0258278	0.025822	0.787756	0.0256646	0.0255366	5.4719	0.099984	0.654042	0.0310387	0.0313033	-0.424584	0.047519	0.0472772	-0.918999	0.202926	5.4719	-0.884589	0.659442	0.188025
42	YPW3025	TATA.42_TATA.42	1	DOUBLE	1	1	1	A	11	A11	1	1	1	1	1	1	14190	12418	5723	5668	0.322326	50	5.48889	0.0956777	4.49414	0.144213	0.819732	0.0215142	0.0202807	0.686391	0.0242928	0.024288	0.819401	0.0216281	0.0201677	5.48864	0.0957495	0.697354	0.0333377	0.0303759	-0.360462	0.0479332	0.043656	-0.671534	0.153746	5.48864	-0.637124	0.704271	0.138845
4	YPW2455	m76.m66	1	SINGLE	1	1	1	A	12	A12	1	1	1	1	1	1	15264	11377	5152	4986	-0.015335	51	5.4898	0.116518	2.91803	0.328316	0.530939	0.0592329	0.0645236	0.620774	-0.0163639	-0.0163625	0.531367	0.0595552	0.0645066	5.49036	0.116891	0.520556	0.00964394	0.00995674	-0.652858	0.0184763	0.0189524	-2.92396	0.479301	5.49036	-2.88955	0.521283	0.4644
40	YPW3021	m63.m90_TATA.26	1	DOUBLE	1	1	1	B	1	B01	1	1	1	1	1	2	18798	16427	6655	6545	0.0587133	50	5.48858	0.0940986	4.60739	0.146152	0.838954	0.0219546	0.0208521	0.760368	0.0143181	0.0143172	0.838765	0.0217926	0.0208169	5.48859	0.0941114	0.729656	0.0387847	0.0376613	-0.315182	0.053362	0.0511904	-0.520103	0.163834	5.49175	-0.487889	0.737182	0.148896
11	YPW2550	TATA.26	1	SINGLE	1	1	1	B	2	B02	1	1	1	1	1	2	12658	11628	5197	5107	0.24999	50	5.46998	0.105466	3.95909	0.136092	0.722816	0.0186979	0.0180909	0.503837	0.0400327	0.0400113	0.722418	0.0181262	0.0176742	5.46947	0.10545	0.592328	0.0132166	0.0128208	-0.523696	0.0223917	0.0215777	-1.42994	0.138535	5.47263	-1.39772	0.595357	0.123597
CTRL	YPW1002	REF	1	SINGLE	1	1	1	B	3	B03	1	1	1	1	1	2	16696	15306	6926	6856	0.283	50	5.47321	0.0955683	4.97118	0.125764	0.907318	0.0182881	0.0169894	0.920612	-0.00242881	-0.0024288	0.907301	0.0183166	0.016988	5.47323	0.0955452	0.892652	0.0560851	0.0527235	-0.113558	0.062902	0.0585407	0.0158438	0.134201	5.47639	0.0480583	0.905515	0.119262
49	YPW3040	m66_TATA.129	1	DOUBLE	1	1	1	B	4	B04	1	1	1	1	1	2	17390	15306	6817	6761	0.484698	50	5.48662	0.0915279	5.01858	0.134765	0.914097	0.019926	0.018701	0.878327	0.00651951	0.00651942	0.913993	0.0199291	0.0186931	5.48665	0.0915393	0.913761	0.0644858	0.0601376	-0.0901858	0.0707621	0.0656411	0.0681801	0.145267	5.48981	0.100395	0.927315	0.130328
43	YPW3010	m63.m89_TATA.42	1	DOUBLE	1	1	1	B	5	B05	1	1	1	1	1	2	17942	16128	6751	6584	0.27256	50	5.48579	0.0917504	5.11426	0.140953	0.932019	0.0216221	0.0210386	0.964979	-0.00600816	-0.00600809	0.931986	0.0216746	0.0210327	5.48578	0.0917252	0.976306	0.0808657	0.077375	-0.0239791	0.0828816	0.079156	0.208882	0.162374	5.48894	0.241097	0.991907	0.147435
16	YPW2653	m75.TATA.42	1	SINGLE	1	1	1	B	6	B06	1	1	1	1	1	2	11655	10613	4694	4579	0.125034	50	5.47616	0.111591	3.75702	0.164541	0.685272	0.0248394	0.0263674	0.43589	0.0455395	0.0455081	0.684478	0.0249102	0.025963	5.47604	0.111444	0.568568	0.013383	0.013881	-0.564634	0.0236393	0.0243053	-1.72663	0.201799	5.4792	-1.69442	0.57082	0.18686
CTRL	YPW1002	REF	1	SINGLE	1	1	1	B	7	B07	1	1	1	1	1	2	14667	13344	6136	6073	0.277003	51	5.48094	0.10557	4.97552	0.135926	0.907017	0.0178438	0.0169426	0.859373	0.00869278	0.00869256	0.906968	0.0179731	0.0169215	5.48083	0.105548	0.891633	0.0549156	0.052404	-0.114701	0.0616474	0.0582382	0.0132446	0.133735	5.48399	0.0454592	0.904461	0.118796
8	YPW2469	m75.m90	1	SINGLE	1	1	1	B	8	B08	1	1	1	1	1	2	11775	10699	4585	4481	0.0266901	50	5.47964	0.105246	3.58024	0.242553	0.652351	0.0421612	0.0429508	0.488392	0.0299216	0.0299126	0.652088	0.0420709	0.0428679	5.47961	0.105273	0.553177	0.0175947	0.0182911	-0.592077	0.0318172	0.0326124	-1.97992	0.342564	5.48277	-1.94771	0.554925	0.327625
52	YPW2676	URA3	2	SINGLE	1	1	1	B	9	B09	1	1	1	1	1	2	17100	15009	6682	6627	0.173657	50	5.49042	0.0967498	4.99069	0.136077	0.909518	0.019702	0.0186066	0.882847	0.00485764	0.00485761	0.909553	0.0196282	0.0186016	5.49045	0.096801	0.899635	0.0619303	0.0567209	-0.105767	0.0686143	0.0634318	0.0334596	0.141855	5.49361	0.0656741	0.912725	0.126916
3	YPW978	NEGATIVE	1	NONE	1	1	1	B	10	B10	1	1	1	1	1	2	10657	7743	3193	3064	-0.0348324	50	5.48487	0.105849	2.86806	0.32423	0.521968	0.0591215	0.0641506	0.856123	-0.0609231	-0.0608479	0.523205	0.0586986	0.0639914	5.48572	0.106082	0.519271	0.0090541	0.00852385	-0.655329	0.0174242	0.0163508	-2.98779	0.437368	5.48888	-2.95557	0.519909	0.422429
CTRL	YPW1002	REF	1	SINGLE	1	1	1	B	11	B11	1	1	1	1	1	2	12774	11684	5462	5416	0.2157	50	5.47626	0.109251	4.96306	0.139429	0.904939	0.0184445	0.0174998	0.860836	0.00805357	0.0080534	0.904706	0.0184451	0.0174807	5.47621	0.10918	0.88476	0.0550814	0.0534346	-0.122439	0.062333	0.0597025	-0.00445011	0.138799	5.47937	0.0277644	0.897364	0.12386
25	YPW1903	m91	1	SINGLE	1	1	1	B	12	B12	1	1	1	1	1	2	14217	12959	5779	5728	0.193737	50	5.47594	0.101231	4.89123	0.13113	0.891911	0.0187777	0.0177603	0.870911	0.00383497	0.00383495	0.891905	0.0186851	0.0177566	5.47593	0.101243	0.848089	0.051139	0.0488046	-0.164769	0.0602777	0.0570535	-0.104551	0.140119	5.47909	-0.0723364	0.859493	0.125181
23	YPW1892	m89	1	SINGLE	1	1	1	C	1	C01	1	1	1	1	1	3	15782	14302	6200	6141	0.150602	50	5.47724	0.102243	4.86117	0.128298	0.886614	0.0167075	0.0161471	0.840402	0.0084371	0.00843689	0.886584	0.0166713	0.016127	5.47719	0.102232	0.833894	0.0436807	0.0427789	-0.181649	0.0522724	0.0507735	-0.146159	0.128037	5.47808	-0.109947	0.846215	0.113084
2	YPW1002	REF	1	SINGLE	1	1	1	C	2	C02	1	1	1	1	1	3	12850	11698	5136	5089	0.264076	50	5.47806	0.102706	4.97996	0.1234	0.908027	0.016418	0.0154274	0.899624	0.00153398	0.00153398	0.908024	0.0164	0.0154268	5.47805	0.10271	0.894882	0.0509142	0.047994	-0.111064	0.0568429	0.0532652	0.021502	0.121473	5.47894	0.0577133	0.909451	0.106519
50	YPW2671	URA3	1	DOUBLE	1	1	1	C	3	C03	1	1	1	1	1	3	17415	15445	7029	6871	0.439441	50	5.48793	0.0867925	5.76308	0.151247	1.05076	0.0229019	0.0237906	1.17355	-0.0223743	-0.0223706	1.05107	0.0227299	0.023725	5.48821	0.0864969	1.70899	0.216758	0.20939	0.535905	0.126445	0.127636	1.14009	0.173162	5.4891	1.1763	1.75358	0.158209
CTRL	YPW1002	REF	1	SINGLE	1	1	1	C	4	C04	1	1	1	1	1	3	15313	13973	6366	6293	0.345031	50	5.48245	0.103465	4.97353	0.12919	0.906567	0.0180946	0.0168306	0.881337	0.00460198	0.00460194	0.906575	0.0180505	0.0168252	5.48246	0.103362	0.890429	0.0550779	0.0518208	-0.116052	0.0620816	0.0577352	0.0101674	0.132654	5.48335	0.0463787	0.904834	0.1177
39	YPW3019	TATA.26_TATA.26	1	DOUBLE	1	1	1	C	6	C06	1	1	1	1	1	3	16847	14975	6591	6532	0.278143	50	5.49219	0.0948793	4.44698	0.134837	0.810559	0.020071	0.0188479	0.709448	0.0184098	0.0184078	0.810438	0.0198798	0.0187813	5.49197	0.0948357	0.68398	0.0286415	0.0263872	-0.379826	0.0419027	0.0386768	-0.741623	0.143254	5.49286	-0.705411	0.690773	0.128301
28	YPW2820	m75.m90.TATA.26	1	SINGLE	1	1	1	C	7	C07	1	1	1	1	1	3	13634	11807	5098	4839	0.0584133	50	5.47668	0.108496	3.15045	0.254359	0.574401	0.0442816	0.0470197	0.411231	0.0297936	0.0297848	0.574136	0.0441564	0.0469423	5.47627	0.108534	0.528806	0.0100584	0.00987776	-0.637133	0.0190451	0.0186156	-2.58951	0.340328	5.47716	-2.55329	0.529877	0.325374
CTRL	YPW1002	REF	1	SINGLE	1	1	1	C	8	C08	1	1	1	1	1	3	13911	12817	5660	5614	0.298979	50	5.47596	0.0966536	4.96569	0.126586	0.905788	0.0174816	0.0163164	0.900188	0.00102265	0.00102265	0.905801	0.0174971	0.0163161	5.47598	0.0966513	0.888072	0.0529146	0.0499336	-0.118703	0.0596567	0.0558016	0.00411566	0.128599	5.47687	0.040327	0.90239	0.113645
2	YPW1002	REF	1	SINGLE	1	1	1	C	9	C09	1	1	1	1	1	3	12818	11775	5322	5279	0.235153	51	5.48263	0.101262	4.97508	0.12772	0.906706	0.0184232	0.0169519	0.903902	0.000511327	0.000511327	0.906685	0.0183923	0.0169518	5.48263	0.101247	0.890766	0.0559684	0.052482	-0.115673	0.0632402	0.0583333	0.0110306	0.134231	5.48352	0.0472419	0.905184	0.119277
37	YPW2842	m75.TATA.22	1	SINGLE	1	1	1	C	10	C10	1	1	1	1	1	3	12144	11045	5041	4927	0.301433	50	5.47672	0.104866	3.77488	0.176677	0.688963	0.0280042	0.0280556	0.40868	0.0511773	0.0511327	0.688388	0.0281982	0.0276395	5.47686	0.105348	0.570704	0.0153763	0.0155083	-0.560885	0.0270089	0.0269718	-1.69606	0.218667	5.47775	-1.65985	0.573319	0.203713
27	YPW2814	m76.m90.TATA.26	1	SINGLE	1	1	1	C	11	C11	1	1	1	1	1	3	11254	9567	4027	3877	0.043643	50	5.47824	0.100057	3.02938	0.283421	0.553151	0.049402	0.052758	0.452998	0.018282	0.0182799	0.55265	0.0496766	0.0527384	5.47796	0.100198	0.524317	0.00949383	0.00926527	-0.645658	0.0180649	0.0176013	-2.75753	0.377631	5.47885	-2.72131	0.525222	0.362678
CTRL	YPW1002	REF	1	SINGLE	1	1	1	C	12	C12	1	1	1	1	1	3	15815	14394	6942	6890	0.416059	51	5.48386	0.106755	4.96361	0.140584	0.904504	0.0202995	0.018766	0.885576	0.00345147	0.00345146	0.90454	0.0203819	0.018763	5.48389	0.106733	0.884263	0.0609549	0.0562599	-0.123001	0.0691099	0.0633558	-0.00574246	0.146327	5.48477	0.0304689	0.89844	0.131373
34	YPW2834	m75.m90.TATA.22	1	SINGLE	1	1	1	D	1	D01	1	1	1	1	1	4	15546	13863	6346	6089	0.363042	51	5.4888	0.105977	3.18213	0.246011	0.579353	0.0437601	0.0463458	0.502167	0.0140624	0.0140615	0.579067	0.0437173	0.0463296	5.48884	0.10588	0.529947	0.0103739	0.01038	-0.634977	0.0195936	0.019494	-2.55094	0.344102	5.49526	-2.54312	0.530184	0.339327
CTRL	YPW1002	REF	1	SINGLE	1	1	1	D	2	D02	1	1	1	1	1	4	9771	9045	4092	4054	0.374507	50	5.47664	0.0988913	4.94495	0.130243	0.900783	0.0197201	0.017898	0.94279	-0.00767005	-0.0076699	0.900918	0.0196141	0.0178847	5.47664	0.0990147	0.873526	0.0568556	0.0536905	-0.135218	0.0656884	0.0604704	-0.0340661	0.143656	5.48306	-0.0262448	0.87646	0.138881
5	YPW2458	m76.m63	1	SINGLE	1	1	1	D	3	D03	1	1	1	1	1	4	12990	10484	4817	4657	0.0540953	50	5.48942	0.112912	2.98945	0.305672	0.54374	0.055808	0.0620329	0.674987	-0.0239091	-0.0239045	0.544186	0.0556927	0.0619988	5.48975	0.112767	0.522746	0.00987732	0.0107169	-0.648659	0.0189573	0.0202902	-2.82371	0.466685	5.49616	-2.81589	0.522926	0.46191
45	YPW3011	TATA.81_TATA.81	1	DOUBLE	1	1	1	D	4	D04	1	1	1	1	1	4	18361	16625	7541	7404	0.350242	50	5.48741	0.0926289	5.28012	0.229174	0.96155	0.0390761	0.0396579	1.02468	-0.0115054	-0.0115049	0.961649	0.0389189	0.039648	5.48752	0.0926928	1.10072	0.181934	0.189244	0.0959612	0.165909	0.165971	0.44085	0.314917	5.49394	0.448671	1.10543	0.310142
26	YPW2812	m75.m63.TATA.26	1	SINGLE	1	1	1	D	5	D05	1	1	1	1	1	4	12414	9465	4311	4134	0.196042	51	5.49154	0.112896	2.88138	0.310721	0.524087	0.054858	0.0592234	0.614652	-0.0164918	-0.0164903	0.524304	0.0550908	0.0592059	5.49165	0.113096	0.519439	0.00840917	0.00835475	-0.655005	0.0161964	0.0159957	-2.97919	0.425023	5.49807	-2.97137	0.519594	0.420248
CTRL	YPW1002	REF	1	SINGLE	1	1	1	D	6	D06	1	1	1	1	1	4	7350	6747	2884	2841	0.222344	50	5.47032	0.100398	4.98535	0.124065	0.910826	0.0155403	0.0151656	0.90663	0.000766991	0.00076699	0.910837	0.0154653	0.0151654	5.47032	0.100361	0.903669	0.0487992	0.0479601	-0.101292	0.0538982	0.0528404	0.0434986	0.118747	5.47673	0.0513199	0.90684	0.113972
48	YPW3015	TATA.129_TATA.129	1	DOUBLE	1	1	1	D	7	D07	1	1	1	1	1	4	17574	15945	7322	7233	0.340444	51	5.49593	0.10151	5.19909	0.134014	0.945692	0.0197543	0.018548	0.978712	-0.00600816	-0.00600809	0.945743	0.0198074	0.0185399	5.49592	0.101564	1.03043	0.0820855	0.076484	0.029977	0.0793991	0.0740465	0.316464	0.144133	5.50234	0.324286	1.0346	0.139358
12	YPW2651	TATA.129	1	SINGLE	1	1	1	D	8	D08	1	1	1	1	1	4	10725	9944	4276	4207	0.281899	50	5.47663	0.0977355	4.63924	0.128329	0.846455	0.0185729	0.0176738	0.756836	0.0163639	0.0163625	0.846294	0.018373	0.0176121	5.47656	0.0977864	0.743596	0.0350782	0.0338931	-0.296257	0.0471342	0.0452366	-0.46123	0.139012	5.48298	-0.453408	0.745511	0.134237
CTRL	YPW1002	REF	1	SINGLE	1	1	1	D	10	D10	1	1	1	1	1	4	6997	6277	2572	2546	0.35904	50	5.46943	0.103815	4.98284	0.124945	0.910787	0.0161334	0.0156537	0.900999	0.00178965	0.00178964	0.910779	0.0161599	0.0156528	5.46941	0.103792	0.903486	0.050797	0.0494454	-0.101494	0.0562609	0.0544918	0.0430462	0.122479	5.47582	0.0508674	0.906656	0.117705
1	YPW1617	WT	1	SINGLE	1	1	1	D	11	D11	1	1	1	1	1	4	8527	7850	3463	3434	0.166038	50	5.48314	0.106879	5.06302	0.124891	0.923355	0.0169381	0.0162858	0.94999	-0.00485764	-0.00485761	0.92348	0.0170499	0.0162785	5.48317	0.106799	0.945642	0.0596596	0.056164	-0.0558915	0.0627145	0.0594372	0.142368	0.125968	5.48959	0.150189	0.949143	0.121193
20	YPW1960	m76	1	SINGLE	1	1	1	D	12	D12	1	1	1	1	1	4	9184	8370	3783	3707	0.173763	51	5.48088	0.111614	3.85467	0.217712	0.702807	0.0369397	0.0362996	0.57597	0.0231417	0.0231375	0.702787	0.0365879	0.0362296	5.48088	0.112161	0.579157	0.0225576	0.0226875	-0.546182	0.0389562	0.038695	-1.58345	0.285828	5.4873	-1.57563	0.57978	0.281053
CTRL	YPW1002	REF	1	SINGLE	1	1	1	E	1	E01	2	1	1	1	2	1	18702	16775	8186	8131	0.194348	50	5.48682	0.100642	5.00597	0.126819	0.911572	0.0165488	0.0156816	0.870891	0.00741438	0.00741424	0.911451	0.0165956	0.0156666	5.48681	0.100584	0.905612	0.0527226	0.0500482	-0.0991448	0.0582763	0.0548851	0.0482973	0.123323	5.4841	0.0480596	0.905515	0.121711
51	YPW2675	URA3	1	SINGLE	1	1	1	E	2	E02	2	1	1	1	2	1	15605	13993	6570	6545	0.301644	50	5.49378	0.0901066	4.9897	0.143603	0.908498	0.022472	0.0204696	0.853719	0.00997121	0.00997088	0.90851	0.0225136	0.0204535	5.49379	0.0900551	0.896386	0.0702542	0.0623953	-0.109384	0.0782722	0.0697114	0.0253014	0.157324	5.49108	0.0250638	0.896291	0.155711
31	YPW2826	m75.TATA.26	1	SINGLE	1	1	1	E	3	E03	2	1	1	1	2	1	18457	17005	8067	7850	0.199078	50	5.47797	0.104269	3.63043	0.163366	0.662397	0.0251158	0.0256418	0.354661	0.0561771	0.0561181	0.661588	0.0246481	0.0250992	5.47791	0.104319	0.557295	0.0112215	0.0111654	-0.584661	0.0201316	0.0199763	-1.90563	0.194138	5.4752	-1.90587	0.557281	0.192526
1	YPW1617	WT	1	SINGLE	1	1	1	E	4	E04	2	1	1	1	2	1	15998	14662	6762	6689	0.465148	50	5.47645	0.0978206	5.05799	0.12451	0.922137	0.0170024	0.016015	0.921437	0.000127832	0.000127832	0.922142	0.0170049	0.016015	5.47645	0.0978152	0.940998	0.0586274	0.0557928	-0.0608143	0.0621836	0.0587805	0.131898	0.126453	5.47374	0.131661	0.940893	0.12484
CTRL	YPW1002	REF	1	SINGLE	1	1	1	E	5	E05	2	1	1	1	2	1	17812	16423	7467	7401	0.33417	50	5.48184	0.0940345	4.99324	0.123965	0.910074	0.0163924	0.0155976	0.866626	0.00792573	0.00792557	0.909909	0.0162758	0.0155826	5.48178	0.0940085	0.900747	0.0511154	0.0493754	-0.104531	0.056649	0.054349	0.0362386	0.123141	5.47907	0.0360009	0.900652	0.121529
11	YPW2550	TATA.26	1	SINGLE	1	1	1	E	6	E06	2	1	1	1	2	1	15075	13762	6458	6327	0.286228	50	5.47283	0.104097	3.96788	0.133124	0.724338	0.018507	0.017704	0.494735	0.0419534	0.0419288	0.723821	0.018065	0.0172445	5.47287	0.104126	0.593348	0.013176	0.0126508	-0.521975	0.0222592	0.0212557	-1.41897	0.135208	5.47016	-1.41921	0.593326	0.133596
50	YPW2671	URA3	1	DOUBLE	1	1	1	E	7	E07	2	1	1	1	2	1	15171	13372	6087	5926	0.253111	50	5.49859	0.0952996	5.78098	0.142161	1.05139	0.0203339	0.0202447	1.14488	-0.0170033	-0.0170016	1.05133	0.0204846	0.0201904	5.49863	0.0952723	1.71153	0.194158	0.184351	0.537388	0.113454	0.109912	1.14218	0.152137	5.49592	1.14195	1.71124	0.150524
2	YPW1002	REF	1	SINGLE	1	1	1	E	8	E08	2	1	1	1	2	1	13985	12902	5872	5752	0.213689	50	5.48318	0.10456	4.99578	0.124436	0.909975	0.0158642	0.015124	0.888947	0.00383497	0.00383495	0.909925	0.0158721	0.0151196	5.48317	0.104526	0.900797	0.0496139	0.0479243	-0.104475	0.0550888	0.0527479	0.036363	0.119507	5.48046	0.0361253	0.900702	0.117895
CTRL	YPW1002	REF	1	SINGLE	1	1	1	E	9	E09	2	1	1	1	2	1	16007	14735	6714	6653	0.307676	50	5.48159	0.0969016	4.9892	0.125996	0.909145	0.0170285	0.0160806	0.856589	0.00958767	0.00958738	0.909103	0.0169199	0.0160571	5.48164	0.0967588	0.89823	0.0523576	0.0504458	-0.107329	0.0586443	0.0557229	0.0299404	0.126606	5.47892	0.0297028	0.898135	0.124993
51	YPW2675	URA3	1	SINGLE	1	1	1	E	10	E10	2	1	1	1	2	1	17201	15239	7120	7075	0.545093	50	5.48903	0.0937548	4.99903	0.128413	0.910546	0.0176834	0.0167613	0.879672	0.00562466	0.0056246	0.910518	0.0176083	0.016754	5.48892	0.0937548	0.902661	0.0556337	0.0523195	-0.102408	0.0616898	0.0579344	0.0410005	0.129864	5.48621	0.0407629	0.902565	0.128251
33	YPW2832	m76.m90.TATA.22	1	SINGLE	1	1	1	E	11	E11	2	1	1	1	2	1	16615	13594	6377	6110	0.20797	50	5.4861	0.116277	3.07262	0.296058	0.559039	0.0525194	0.0573773	0.503634	0.0100991	0.0100987	0.558732	0.0526084	0.05737	5.48586	0.116464	0.525513	0.0105729	0.010714	-0.643381	0.0201181	0.0202557	-2.70996	0.416394	5.48315	-2.7102	0.525506	0.414781
15	YPW2528	TATA.2	1	SINGLE	1	1	1	E	12	E12	2	1	1	1	2	1	16670	15067	7710	7627	0.423413	50	5.47954	0.105896	4.74084	0.141878	0.864998	0.0188372	0.018049	0.739594	0.0228859	0.0228819	0.864812	0.0185995	0.0179127	5.47955	0.105683	0.781587	0.0410372	0.0393719	-0.246429	0.0525851	0.0501813	-0.316422	0.139714	5.47684	-0.31666	0.78152	0.138101
10	YPW2478	m63.m89	1	SINGLE	1	1	1	F	1	F01	2	1	1	1	2	2	20552	18822	8565	8382	0.231867	50	5.48231	0.103	4.03056	0.250036	0.734823	0.0417263	0.0422195	0.437386	0.0542538	0.0542007	0.734631	0.0407967	0.0419611	5.48252	0.103082	0.601602	0.0326312	0.0335956	-0.50816	0.0542208	0.0547746	-1.33443	0.329953	5.48191	-1.3386	0.601178	0.328799
2	YPW1002	REF	1	SINGLE	1	1	1	F	2	F02	2	1	1	1	2	2	14843	13582	5994	5904	0.259433	50	5.47935	0.1041	5.00295	0.120325	0.91206	0.0152731	0.0145512	0.905055	0.00127832	0.00127832	0.912021	0.0152771	0.0145508	5.47936	0.104121	0.907426	0.0488076	0.0467877	-0.0971436	0.0538709	0.0511821	0.0527574	0.114776	5.47875	0.0485922	0.905731	0.113622
CTRL	YPW1002	REF	1	SINGLE	1	1	1	F	3	F03	2	1	1	1	2	2	18478	16811	7769	7694	0.274186	50	5.48042	0.101149	4.99709	0.128582	0.910847	0.0163856	0.0156071	0.868111	0.00779789	0.00779774	0.910801	0.0164422	0.0155901	5.48039	0.101307	0.903556	0.0517661	0.0496241	-0.101418	0.0572642	0.0545085	0.0432184	0.122901	5.47978	0.0390532	0.901877	0.121747
36	YPW2840	m63.m89.TATA.22	1	SINGLE	1	1	1	F	4	F04	2	1	1	1	2	2	16093	14454	6824	6608	0.241343	50	5.47702	0.106703	3.43353	0.266468	0.626253	0.046268	0.0479541	0.274301	0.0642598	0.0641715	0.625696	0.0457266	0.0476297	5.47674	0.107613	0.54322	0.0156272	0.0162239	-0.610241	0.028762	0.0294998	-2.18631	0.373497	5.47613	-2.19047	0.543039	0.372343
2	YPW1002	REF	1	SINGLE	1	1	1	F	5	F05	2	1	1	1	2	2	17732	16257	7746	7646	0.307095	50	5.47896	0.102938	4.99274	0.128395	0.910108	0.0165558	0.0157463	0.856877	0.00971552	0.00971521	0.910015	0.0165424	0.0157196	5.47888	0.102931	0.901081	0.0519517	0.0496988	-0.10416	0.057585	0.0547546	0.03707	0.123845	5.47827	0.0329048	0.899413	0.122691
52	YPW2676	URA3	2	SINGLE	1	1	1	F	6	F06	2	1	1	1	2	2	18926	16981	7672	7624	0.204673	51	5.5009	0.0945796	5.02088	0.125189	0.912277	0.0165284	0.0159395	0.858129	0.00984336	0.00984304	0.912221	0.0163562	0.0159167	5.50082	0.0945986	0.908065	0.052071	0.050495	-0.0964397	0.0573521	0.0555394	0.0543236	0.123677	5.50021	0.0501584	0.906368	0.122522
CTRL	YPW1002	REF	1	SINGLE	1	1	1	F	7	F07	2	1	1	1	2	2	16229	14941	7108	7036	0.300734	50	5.4803	0.10156	4.98656	0.126914	0.909913	0.0160678	0.0158983	0.854568	0.0100991	0.0100987	0.909891	0.0161646	0.015871	5.48033	0.10148	0.900691	0.0507726	0.0500979	-0.104594	0.0562841	0.0552181	0.0360972	0.124961	5.47972	0.031932	0.899024	0.123807
30	YPW2824	m63.m89.TATA.26	1	SINGLE	1	1	1	F	8	F08	2	1	1	1	2	2	17212	15049	6873	6571	0.164618	50	5.48354	0.101219	3.21484	0.273516	0.585743	0.0475816	0.0508149	0.278397	0.0560489	0.0559903	0.584754	0.0474799	0.0506151	5.48316	0.101605	0.531319	0.0117587	0.0118261	-0.632392	0.0221507	0.0221153	-2.50647	0.37499	5.48255	-2.51064	0.531188	0.373836
50	YPW2671	URA3	1	DOUBLE	1	1	1	F	9	F09	2	1	1	1	2	2	17892	15812	7015	6801	0.25916	51	5.50218	0.0970262	5.78428	0.143175	1.05135	0.0201591	0.0205403	1.14772	-0.0175147	-0.0175129	1.05152	0.01988	0.0204828	5.50238	0.0970929	1.71331	0.189059	0.18796	0.538427	0.110329	0.111618	1.14365	0.154887	5.50176	1.13949	1.70827	0.153733
1	YPW1617	WT	1	SINGLE	1	1	1	F	10	F10	2	1	1	1	2	2	15479	14016	6723	6628	0.258446	50	5.47274	0.103501	5.04978	0.131247	0.92156	0.0179929	0.0167924	0.92226	-0.000127832	-0.000127832	0.921556	0.0180026	0.0167924	5.47275	0.103501	0.938982	0.0616691	0.0582226	-0.0629586	0.0659449	0.0614519	0.12732	0.132565	5.47213	0.123154	0.937157	0.131411
CTRL	YPW1002	REF	1	SINGLE	1	1	1	F	11	F11	2	1	1	1	2	2	13074	11968	5618	5563	0.298941	50	5.47878	0.108905	4.98261	0.130324	0.90893	0.0160838	0.0157447	0.892822	0.00294014	0.00294013	0.908902	0.0161144	0.0157419	5.47879	0.108899	0.897603	0.0503768	0.0492496	-0.108028	0.056103	0.0545054	0.0283649	0.123799	5.47817	0.0241997	0.895949	0.122644
46	YPW3012	m75_TATA.81	1	DOUBLE	1	1	1	F	12	F12	2	1	1	1	2	2	8674	7412	3158	3086	0.483965	50	5.48396	0.0840983	5.22671	0.132703	0.953188	0.0199369	0.0196422	0.968611	-0.00281231	-0.0028123	0.953224	0.0199175	0.0196411	5.48399	0.0841206	1.0624	0.0888279	0.0846434	0.0605304	0.0827282	0.0800142	0.374965	0.150446	5.48338	0.370799	1.06006	0.149292
17	YPW2566	TATA.42	1	SINGLE	1	1	1	G	1	G01	2	1	1	1	2	3	22329	20343	10092	9960	0.211792	50	5.49042	0.106643	4.20381	0.143762	0.76495	0.0192763	0.0183509	0.552886	0.0386244	0.0386052	0.764455	0.0189383	0.0179672	5.49033	0.106575	0.628346	0.0191081	0.0181128	-0.464664	0.0304313	0.0287114	-1.10121	0.140886	5.48754	-1.10291	0.628127	0.137401
7	YPW2460	m76.m90	1	SINGLE	1	1	1	G	2	G02	2	1	1	1	2	3	16953	15439	7502	7309	0.166713	50	5.4834	0.105598	3.40603	0.277978	0.620796	0.0499114	0.051115	0.615188	0.00102265	0.00102265	0.620788	0.0499136	0.0511149	5.48338	0.105598	0.541585	0.0160277	0.0170894	-0.613256	0.0295767	0.0310556	-2.22468	0.408814	5.48059	-2.22639	0.541513	0.405329
3	YPW978	NEGATIVE	1	NONE	1	1	1	G	3	G03	2	1	1	1	2	3	9824	7239	3022	2918	0.16982	50	5.49042	0.117287	2.86303	0.331116	0.520221	0.0590004	0.0648173	0.658515	-0.0251882	-0.0251829	0.520458	0.0590043	0.0647815	5.49065	0.117511	0.518857	0.00899626	0.00942419	-0.656127	0.0173507	0.0179496	-3.00927	0.494064	5.48785	-3.01097	0.518825	0.490578
CTRL	YPW1002	REF	1	SINGLE	1	1	1	G	4	G04	2	1	1	1	2	3	16863	15371	7171	7080	0.278668	50	5.48609	0.103853	4.99496	0.136281	0.910149	0.0184562	0.0175319	0.870875	0.0071587	0.00715858	0.910107	0.0184698	0.0175189	5.48606	0.103827	0.90137	0.0577375	0.0548445	-0.103839	0.0640851	0.0606366	0.0377913	0.136569	5.48327	0.0360867	0.900686	0.133084
22	YPW1896	m63	1	SINGLE	1	1	1	G	5	G05	2	1	1	1	2	3	17339	15742	7344	7255	0.180152	50	5.47805	0.105367	4.7887	0.141768	0.873189	0.0183858	0.0181996	0.743615	0.0236533	0.0236489	0.872974	0.018091	0.0180587	5.47826	0.105453	0.800161	0.0424451	0.043096	-0.222942	0.0531101	0.0532465	-0.252591	0.143472	5.47547	-0.254295	0.79965	0.139987
29	YPW2816	m76.TATA.26	1	SINGLE	1	1	1	G	6	G06	2	1	1	1	2	3	9969	9033	3894	3737	0.0695495	50	5.46887	0.10529	3.31702	0.225901	0.605971	0.0382466	0.0400332	0.41504	0.0349122	0.0348981	0.605684	0.0375368	0.0399087	5.46864	0.104883	0.536927	0.0108639	0.011136	-0.621892	0.0202295	0.020645	-2.3428	0.299796	5.46585	-2.3445	0.536864	0.296311
CTRL	YPW1002	REF	1	SINGLE	1	1	1	G	8	G08	2	1	1	1	2	3	15344	14103	6403	6334	0.347504	50	5.4852	0.100014	5.00428	0.12383	0.910705	0.0155884	0.0147672	0.884761	0.00472981	0.00472977	0.910539	0.0156624	0.0147607	5.48523	0.10004	0.902728	0.0490441	0.0470853	-0.102334	0.0544532	0.0516911	0.0411662	0.116853	5.48244	0.0394616	0.902042	0.113368
6	YPW2465	m75.m63	1	SINGLE	1	1	1	G	9	G09	2	1	1	1	2	3	13494	10878	4551	4400	0.0392409	50	5.4828	0.110188	3.04999	0.340177	0.55512	0.0606842	0.065379	0.357387	0.0360642	0.0360485	0.554104	0.0606683	0.0653122	5.48271	0.10996	0.524598	0.0118212	0.0130709	-0.645123	0.0225129	0.0244979	-2.74615	0.526716	5.47992	-2.74786	0.524556	0.523231
41	YPW3022	m63.m89_m63.m89	1	DOUBLE	1	1	1	G	10	G10	2	1	1	1	2	3	14308	12591	5636	5517	0.344545	50	5.49101	0.0947103	4.95104	0.155081	0.900443	0.023867	0.0235958	0.852009	0.00882062	0.00882039	0.900391	0.0239305	0.0235839	5.49107	0.0948439	0.871986	0.0696904	0.0694164	-0.136982	0.0798206	0.0784676	-0.0381934	0.186501	5.48828	-0.039898	0.871352	0.183016
29	YPW2816	m76.TATA.26	1	SINGLE	1	1	1	G	11	G11	2	1	1	1	2	3	12227	10901	4597	4383	0.197497	50	5.4766	0.111524	3.30664	0.229372	0.603458	0.0395994	0.0410462	0.349145	0.0464363	0.0464029	0.603008	0.0396695	0.0408185	5.47604	0.111537	0.536158	0.0110517	0.0112502	-0.623326	0.0206403	0.0208759	-2.36373	0.309276	5.47325	-2.36543	0.536096	0.305791
CTRL	YPW1002	REF	1	SINGLE	1	1	1	G	12	G12	2	1	1	1	2	3	16412	15131	7226	7139	0.342285	50	5.48434	0.10456	5.00047	0.128553	0.911093	0.0154812	0.0151489	0.866223	0.00818141	0.00818123	0.910968	0.0155066	0.0151286	5.48444	0.104585	0.904083	0.0488767	0.0480897	-0.100834	0.054259	0.0528658	0.044524	0.118945	5.48165	0.0428194	0.903395	0.11546
44	YPW3028	m75_m75	1	DOUBLE	1	1	1	H	1	H01	2	1	1	1	2	4	16444	14862	7245	7098	0.316947	50	5.49548	0.0974312	5.20441	0.144527	0.946297	0.0202113	0.0202904	0.911172	0.00639167	0.00639159	0.946125	0.0201639	0.0202826	5.49545	0.0973471	1.03202	0.0841406	0.0840816	0.0315154	0.0814768	0.081058	0.31945	0.157978	5.49791	0.307164	1.02552	0.156993
CTRL	YPW1002	REF	1	SINGLE	1	1	1	H	2	H02	2	1	1	1	2	4	18983	16998	7964	7899	0.259154	50	5.48383	0.0994198	5.00335	0.130195	0.911666	0.016505	0.0155328	0.852779	0.0107383	0.0107379	0.911439	0.0164138	0.0155018	5.48376	0.0993611	0.905574	0.0519794	0.0496524	-0.0991863	0.0574514	0.0543923	0.0482045	0.122359	5.48621	0.035919	0.900619	0.121374
2	YPW1002	REF	1	SINGLE	1	1	1	H	3	H03	2	1	1	1	2	4	18778	17119	8040	7976	0.322835	51	5.48559	0.103748	5.00871	0.129019	0.911786	0.0157856	0.0152713	0.859191	0.00958767	0.00958738	0.911597	0.0157084	0.0152433	5.48564	0.103678	0.906074	0.0495734	0.0490261	-0.0986342	0.05482	0.0536012	0.0494363	0.120667	5.48809	0.0371508	0.901113	0.119682
38	YPW3006	m63.m90_m63.m90	1	DOUBLE	1	1	1	H	4	H04	2	1	1	1	2	4	17517	15470	6692	6341	0.203896	50	5.49169	0.0901462	5.21262	0.1556	0.948582	0.0236668	0.0253266	0.950688	-0.000383495	-0.000383495	0.94859	0.0236774	0.0253266	5.49168	0.0901787	1.04238	0.100864	0.104896	0.0415024	0.0967848	0.100642	0.338725	0.193323	5.49413	0.326439	1.03575	0.192337
14	YPW2546	TATA.22	1	SINGLE	1	1	1	H	5	H05	2	1	1	1	2	4	7515	6841	3332	3225	0.123393	49	5.43623	0.12063	4.52293	0.131283	0.831002	0.0176277	0.0176937	0.796255	0.00639167	0.00639159	0.830751	0.0177308	0.0176792	5.43623	0.120602	0.715693	0.0295512	0.0305846	-0.334505	0.0414758	0.0422076	-0.582772	0.141654	5.43868	-0.595058	0.713056	0.140669
CTRL	YPW1002	REF	1	SINGLE	1	1	1	H	6	H06	2	1	1	1	2	4	16935	15459	6961	6872	0.352513	50	5.47588	0.100243	4.99774	0.123295	0.911691	0.015803	0.0149548	0.878791	0.00600816	0.00600809	0.911687	0.0157865	0.0149448	5.4759	0.100256	0.906361	0.0500155	0.0479935	-0.0983178	0.0552707	0.0525227	0.0501417	0.118042	5.47835	0.0378562	0.901396	0.117057
18	YPW2605	TATA.81	1	SINGLE	1	1	1	H	7	H07	2	1	1	1	2	4	18998	17299	8134	8004	0.360006	50	5.47829	0.102492	4.3766	0.134242	0.798133	0.0173979	0.0168308	0.578121	0.0401607	0.0401392	0.797755	0.017028	0.0164101	5.47832	0.102749	0.666588	0.0221364	0.0217852	-0.405584	0.0332751	0.0324254	-0.840808	0.130603	5.48077	-0.853093	0.664551	0.129617
47	YPW3034	m66_m66	1	DOUBLE	1	1	1	H	8	H08	2	1	1	1	2	4	18027	16121	7543	7423	0.444833	50	5.49514	0.0937381	5.46269	0.134124	0.99279	0.017968	0.0172878	0.988575	0.000766991	0.00076699	0.992812	0.0180023	0.0172877	5.49514	0.0937604	1.26655	0.10738	0.103797	0.236294	0.0850887	0.0814909	0.684545	0.13537	5.4976	0.672259	1.25718	0.134384
35	YPW2836	m76.TATA.22	1	SINGLE	1	1	1	H	9	H09	2	1	1	1	2	4	17412	15635	6980	6694	0.206902	50	5.47604	0.097483	3.3822	0.232219	0.616854	0.0404809	0.0423057	0.420066	0.0359362	0.0359207	0.616262	0.0403875	0.0422047	5.47568	0.0975852	0.540131	0.0126664	0.0127636	-0.615944	0.0234108	0.0235134	-2.26008	0.316333	5.47813	-2.27237	0.539638	0.315348
CTRL	YPW1002	REF	1	SINGLE	1	1	1	H	10	H10	2	1	1	1	2	4	12194	11129	5152	5057	0.299404	50	5.47275	0.106481	4.99553	0.127995	0.912144	0.0154203	0.0150738	0.904449	0.00140615	0.00140615	0.912126	0.0154448	0.0150732	5.47273	0.106536	0.907759	0.0491265	0.0483966	-0.0967764	0.054285	0.0529572	0.0535745	0.118626	5.47518	0.041289	0.902777	0.11764
2	YPW1002	REF	1	SINGLE	1	1	1	H	11	H11	2	1	1	1	2	4	17626	15738	7326	7257	0.184154	50	5.48769	0.108177	5.00978	0.133044	0.912287	0.0165692	0.0157842	0.842133	0.0127839	0.0127832	0.912052	0.0165266	0.0157329	5.48772	0.108099	0.907524	0.0523047	0.0504731	-0.0970351	0.0577502	0.055242	0.0529989	0.123787	5.49017	0.0407134	0.902546	0.122802
9	YPW2475	m63.m90	1	SINGLE	1	1	1	H	12	H12	2	1	1	1	2	4	20598	18761	8899	8671	0.226289	50	5.48208	0.106184	3.74842	0.296871	0.683177	0.0506317	0.0516213	0.382239	0.0548949	0.0548398	0.68227	0.0502544	0.0514098	5.48184	0.106299	0.567391	0.0265487	0.0275601	-0.566706	0.0470073	0.0475535	-1.7439	0.40764	5.48429	-1.75618	0.566566	0.406654
CTRL	YPW1002	REF	1	SINGLE	1	2	2	A	1	A01	1	1	2	2	3	1	19589	17898	8454	8400	0.170312	50	5.48916	0.104357	4.97337	0.138206	0.905587	0.0192523	0.0176887	0.86138	0.00805357	0.0080534	0.905449	0.0192066	0.0176719	5.48911	0.104262	0.887006	0.0577533	0.0538286	-0.119904	0.0652438	0.0602466	0.00136644	0.139012	5.48927	0.049741	0.906198	0.11763
21	YPW1897	m66	1	SINGLE	1	2	2	A	2	A02	1	1	2	2	3	1	15361	14287	7015	6894	0.58428	50	5.47366	0.103824	4.59953	0.161908	0.839602	0.0229162	0.0234368	0.680024	0.0291539	0.0291456	0.839363	0.0225759	0.0232794	5.47346	0.103493	0.730734	0.0405162	0.0424994	-0.313706	0.0557637	0.0574601	-0.515427	0.184018	5.47361	-0.467053	0.742181	0.162637
13	YPW2656	TATA.135	1	SINGLE	1	2	2	A	3	A03	1	1	2	2	3	1	20022	18364	8680	8565	0.228655	50	5.47472	0.105861	4.19338	0.141167	0.765329	0.0202698	0.0192271	0.584704	0.0329926	0.0329806	0.764813	0.0198614	0.0189695	5.47453	0.105476	0.628707	0.0200902	0.019268	-0.464091	0.0319806	0.0304807	-1.09841	0.149452	5.47469	-1.05003	0.635097	0.128071
1	YPW1617	WT	1	SINGLE	1	2	2	A	4	A04	1	1	2	2	3	1	17659	16320	7677	7559	0.368252	50	5.48168	0.0995485	5.03828	0.1283	0.91833	0.0172107	0.0165243	0.900812	0.0031958	0.00319579	0.91832	0.0172568	0.0165218	5.48177	0.0995739	0.928009	0.0576868	0.0558367	-0.0747137	0.0621045	0.0596495	0.102018	0.130391	5.48193	0.150392	0.949234	0.109009
CTRL	YPW1002	REF	1	SINGLE	1	2	2	A	5	A05	1	1	2	2	3	1	18358	16593	7818	7752	0.251495	50	5.47769	0.102816	4.95603	0.14055	0.903674	0.0202413	0.0187521	0.846954	0.0103547	0.0103544	0.903555	0.0200967	0.0187272	5.47766	0.102716	0.88131	0.0600054	0.0558898	-0.126345	0.0681927	0.0630744	-0.0134507	0.146489	5.47781	0.0349238	0.90022	0.125108
32	YPW2828	m75.m63.TATA.22	1	SINGLE	1	2	2	A	7	A07	1	1	2	2	3	1	18811	13890	6661	6430	0.0519187	51	5.49004	0.11562	2.90146	0.313217	0.527203	0.0564066	0.0601698	0.671807	-0.0263394	-0.0263333	0.527533	0.0564132	0.0601224	5.49116	0.115648	0.519942	0.00894937	0.00854577	-0.654038	0.01724	0.0163678	-2.95394	0.4239	5.49132	-2.90557	0.520941	0.402518
24	YPW1901	m90	1	SINGLE	1	2	2	A	8	A08	1	1	2	2	3	1	15240	14002	6666	6586	0.344656	50	5.48218	0.108246	4.79701	0.135062	0.874192	0.0183059	0.0173575	0.793595	0.0147017	0.0147006	0.874139	0.0182599	0.0172967	5.48206	0.108105	0.802909	0.0430476	0.0414853	-0.219514	0.0536023	0.0512029	-0.243485	0.136858	5.48221	-0.19511	0.817933	0.115476
CTRL	YPW1002	REF	1	SINGLE	1	2	2	A	9	A09	1	1	2	2	3	1	17797	16104	7379	7317	0.373745	50	5.47844	0.0986434	4.95373	0.138499	0.903605	0.0202007	0.0185834	0.860885	0.00779789	0.00779774	0.90355	0.0202514	0.01857	5.47843	0.0986863	0.881297	0.0600926	0.0555268	-0.12636	0.0686768	0.0626135	-0.0134851	0.145543	5.47859	0.0348895	0.900207	0.124161
19	YPW1898	m75	1	SINGLE	1	2	2	A	10	A10	1	1	2	2	3	1	16263	14738	7210	7057	0.233014	50	5.4745	0.112641	4.29112	0.182924	0.783096	0.0273304	0.0268776	0.585663	0.0360642	0.0360485	0.783047	0.0268839	0.0266278	5.47466	0.112602	0.648465	0.0311016	0.0313841	-0.433147	0.0479094	0.0478169	-0.955819	0.211081	5.47482	-0.907445	0.655834	0.189699
42	YPW3025	TATA.42_TATA.42	1	DOUBLE	1	2	2	A	11	A11	1	1	2	2	3	1	9992	8649	4010	3977	0.239022	50	5.49315	0.0977731	4.48386	0.148173	0.817082	0.0220807	0.0210065	0.67872	0.0251882	0.0251829	0.816832	0.0218358	0.020883	5.49311	0.0977719	0.693424	0.032952	0.0306839	-0.366114	0.0475589	0.0443896	-0.691625	0.158457	5.49327	-0.64325	0.703022	0.137075
4	YPW2455	m76.m66	1	SINGLE	1	2	2	A	12	A12	1	1	2	2	3	1	17534	12615	5913	5650	-0.0511034	50	5.48229	0.114539	2.89404	0.34017	0.526608	0.0616621	0.0669302	0.75029	-0.0408009	-0.0407783	0.527019	0.0616466	0.0668396	5.4827	0.114281	0.519861	0.00986452	0.00995519	-0.654194	0.0189216	0.0189588	-2.95796	0.495802	5.48286	-2.90959	0.520856	0.474421
40	YPW3021	m63.m90_TATA.26	1	DOUBLE	1	2	2	B	1	B01	1	1	2	2	3	2	19802	17421	7853	7753	0.182671	50	5.4917	0.0975628	4.58814	0.152389	0.835393	0.0234114	0.0223356	0.756763	0.0143181	0.0143172	0.835426	0.0233952	0.0222996	5.49172	0.0973987	0.723731	0.0406434	0.0392164	-0.323335	0.0562829	0.0537447	-0.546216	0.175113	5.49504	-0.500037	0.734316	0.153694
11	YPW2550	TATA.26	1	SINGLE	1	2	2	B	2	B02	1	1	2	2	3	2	15917	14759	7164	7028	0.31193	50	5.48127	0.109965	3.94014	0.147219	0.718505	0.0205644	0.020464	0.477315	0.0440025	0.0439741	0.718039	0.0203478	0.0199919	5.48079	0.110311	0.589212	0.0142375	0.0139427	-0.52897	0.0242253	0.0235922	-1.46419	0.155907	5.48411	-1.41801	0.593438	0.134488
CTRL	YPW1002	REF	1	SINGLE	1	2	2	B	3	B03	1	1	2	2	3	2	16268	15030	7286	7176	0.43228	50	5.47984	0.10528	4.94786	0.141423	0.902367	0.0207739	0.0188749	0.877149	0.00460198	0.00460194	0.90238	0.0207815	0.0188698	5.4798	0.105247	0.87782	0.0608565	0.0563107	-0.130313	0.0695097	0.0635499	-0.0226402	0.148955	5.48312	0.0235391	0.895687	0.127536
49	YPW3040	m66_TATA.129	1	DOUBLE	1	2	2	B	4	B04	1	1	2	2	3	2	18180	16247	7392	7315	0.330694	50	5.48953	0.0940769	5.01209	0.14066	0.913103	0.0209136	0.0200564	0.865383	0.00869278	0.00869256	0.912985	0.0209433	0.0200427	5.48953	0.0939941	0.91051	0.0674089	0.0633648	-0.0937508	0.0740653	0.0696474	0.0602943	0.154274	5.49285	0.106474	0.929922	0.132855
43	YPW3010	m63.m89_TATA.42	1	DOUBLE	1	2	2	B	5	B05	1	1	2	2	3	2	17242	15405	7305	7177	0.281055	51	5.49787	0.102386	5.09775	0.157835	0.927591	0.0247586	0.0235653	0.928997	-0.000255663	-0.000255663	0.92759	0.024763	0.0235653	5.49786	0.102399	0.960203	0.0896494	0.0822125	-0.0406109	0.0933804	0.0861604	0.174505	0.17856	5.50118	0.220684	0.981963	0.15714
16	YPW2653	m75.TATA.42	1	SINGLE	1	2	2	B	6	B06	1	1	2	2	3	2	17902	16379	7947	7757	0.346635	50	5.47965	0.107701	3.71584	0.176295	0.677893	0.0277157	0.0281619	0.411504	0.0486143	0.0485761	0.677479	0.0277468	0.0277738	5.47942	0.107478	0.564905	0.0141749	0.0140967	-0.571098	0.0250414	0.0248247	-1.78136	0.216465	5.48274	-1.73518	0.567983	0.195046
CTRL	YPW1002	REF	1	SINGLE	1	2	2	B	7	B07	1	1	2	2	3	2	16860	15618	8047	7953	0.380101	50	5.48496	0.107535	4.95172	0.145537	0.901883	0.0220297	0.0195691	0.844386	0.0104826	0.0104822	0.901859	0.0220105	0.0195423	5.48479	0.107559	0.876285	0.0648591	0.0583185	-0.132064	0.0739444	0.0658069	-0.0267107	0.154895	5.48811	0.0194686	0.894079	0.133476
8	YPW2469	m75.m90	1	SINGLE	1	2	2	B	8	B08	1	1	2	2	3	2	15373	14129	6785	6585	0.352819	50	5.4772	0.106425	3.54419	0.245499	0.646284	0.0437613	0.0441245	0.523035	0.0225022	0.0224984	0.646168	0.0437842	0.0440797	5.47723	0.106697	0.550761	0.0173908	0.0179118	-0.596454	0.0315638	0.0320797	-2.02622	0.351354	5.48055	-1.98004	0.553171	0.329935
52	YPW2676	URA3	2	SINGLE	1	2	2	B	9	B09	1	1	2	2	3	2	17916	15823	7157	7109	0.252785	50	5.49303	0.0935179	4.99172	0.136319	0.909084	0.0197658	0.0190222	0.873974	0.00639167	0.00639159	0.90893	0.0197711	0.0190143	5.49303	0.093416	0.89769	0.0618309	0.0572719	-0.10793	0.0685214	0.0643749	0.0285849	0.143933	5.49635	0.0747642	0.916496	0.122513
3	YPW978	NEGATIVE	1	NONE	1	2	2	B	10	B10	1	1	2	2	3	2	4806	3437	1524	1440	-0.253749	51	5.50277	0.127291	2.88309	0.295393	0.522634	0.055542	0.0605374	0.759131	-0.0429779	-0.0429515	0.52325	0.0546239	0.0603741	5.50362	0.126691	0.519278	0.00836661	0.0087901	-0.655316	0.0161304	0.0167656	-2.98743	0.450869	5.50693	-2.94125	0.5202	0.42945
CTRL	YPW1002	REF	1	SINGLE	1	2	2	B	11	B11	1	1	2	2	3	2	11964	10894	5607	5550	0.882154	50	5.4716	0.095398	4.9527	0.130731	0.904199	0.0185153	0.017585	0.874822	0.00536898	0.00536893	0.904128	0.0185625	0.0175787	5.47164	0.0953815	0.883023	0.0559284	0.0529289	-0.124404	0.0633169	0.0595281	-0.00897091	0.138109	5.47496	0.0372084	0.901136	0.11669
25	YPW1903	m91	1	SINGLE	1	2	2	B	12	B12	1	1	2	2	3	2	17782	16193	8057	7980	0.269423	50	5.47286	0.106422	4.87767	0.136184	0.890883	0.0192516	0.0181712	0.858701	0.00588033	0.00588026	0.89071	0.0191488	0.0181621	5.47288	0.106455	0.844849	0.0517226	0.0491444	-0.168598	0.0612375	0.0578069	-0.113898	0.14242	5.4762	-0.0677188	0.861157	0.121001
23	YPW1892	m89	1	SINGLE	1	2	2	C	1	C01	1	1	2	2	3	3	20762	19042	8882	8801	0.25659	50	5.47741	0.109015	4.85249	0.139059	0.885472	0.0174535	0.0165193	0.792338	0.0170033	0.0170016	0.885179	0.0173	0.0164306	5.47735	0.108926	0.830242	0.0448669	0.0429279	-0.186038	0.0539415	0.0512633	-0.157151	0.129904	5.47839	-0.106975	0.847246	0.10847
2	YPW1002	REF	1	SINGLE	1	2	2	C	2	C02	1	1	2	2	3	3	12431	11369	5340	5294	0.277017	50	5.47256	0.104583	4.9508	0.132727	0.903903	0.0176394	0.0169308	0.881517	0.00409064	0.00409061	0.903928	0.0176348	0.0169262	5.47253	0.104584	0.882427	0.0525617	0.0508705	-0.125079	0.0595945	0.0572711	-0.010529	0.132945	5.47357	0.0396472	0.902116	0.111511
50	YPW2671	URA3	1	DOUBLE	1	2	2	C	3	C03	1	1	2	2	3	3	18982	17086	8086	7914	0.371962	50	5.49632	0.0987912	5.73177	0.165247	1.04242	0.0283533	0.0250978	1.17805	-0.0246765	-0.0246715	1.04257	0.0282258	0.0250075	5.49623	0.0985839	1.63127	0.248579	0.215901	0.489359	0.15319	0.133555	1.07365	0.190812	5.49728	1.12383	1.68949	0.169378
CTRL	YPW1002	REF	1	SINGLE	1	2	2	C	4	C04	1	1	2	2	3	3	16169	14796	6995	6897	0.343423	50	5.47978	0.108462	4.96855	0.137779	0.905825	0.0182379	0.0172912	0.858891	0.00856493	0.00856473	0.90577	0.0181978	0.0172708	5.47975	0.108473	0.887977	0.0547159	0.0526953	-0.118809	0.0619273	0.0589282	0.00387213	0.135744	5.4808	0.0540483	0.907952	0.11431
39	YPW3019	TATA.26_TATA.26	1	DOUBLE	1	2	2	C	6	C06	1	1	2	2	3	3	18210	16191	7145	7066	0.174062	51	5.49728	0.100036	4.44615	0.14195	0.809686	0.0204739	0.0190542	0.671923	0.0250603	0.025055	0.809704	0.0200562	0.0189172	5.49719	0.100092	0.682926	0.0288965	0.026596	-0.381369	0.0422088	0.0389677	-0.747366	0.14522	5.49823	-0.69719	0.69235	0.123786
28	YPW2820	m75.m90.TATA.26	1	SINGLE	1	2	2	C	7	C07	1	1	2	2	3	3	14863	13193	6302	5991	0.313406	50	5.4828	0.10746	3.12287	0.253098	0.568268	0.0448128	0.0468775	0.369132	0.0363202	0.0363042	0.567698	0.0446875	0.0467666	5.48287	0.10758	0.527381	0.00975857	0.00927226	-0.639831	0.0185276	0.0175436	-2.63985	0.335961	5.48391	-2.58967	0.528802	0.314527
CTRL	YPW1002	REF	1	SINGLE	1	2	2	C	8	C08	1	1	2	2	3	3	13811	12723	6111	6026	0.36599	50	5.47839	0.108769	4.9582	0.137559	0.904603	0.0185209	0.0173427	0.863984	0.00741438	0.00741424	0.904581	0.0185126	0.0173264	5.47845	0.108809	0.884386	0.0554822	0.0525192	-0.122862	0.0630163	0.0589055	-0.00542255	0.136554	5.4795	0.0447536	0.904176	0.11512
2	YPW1002	REF	1	SINGLE	1	2	2	C	9	C09	1	1	2	2	3	3	12397	11442	5093	5040	0.126137	50	5.47513	0.0983126	4.962	0.126516	0.90585	0.0174292	0.0165903	0.863155	0.00779789	0.00779774	0.905707	0.0173972	0.0165752	5.47517	0.0982053	0.887787	0.0526318	0.0506572	-0.119023	0.0593919	0.0566278	0.00338253	0.130558	5.47622	0.0535587	0.907752	0.109124
37	YPW2842	m75.TATA.22	1	SINGLE	1	2	2	C	10	C10	1	1	2	2	3	3	15612	14105	6667	6501	0.274858	50	5.47479	0.107719	3.76827	0.184575	0.687533	0.0292842	0.0296842	0.363123	0.0592553	0.0591861	0.687298	0.0286402	0.0291221	5.47514	0.107748	0.570102	0.0156585	0.0160392	-0.561939	0.0274731	0.0279395	-1.70458	0.228087	5.47619	-1.6544	0.573721	0.206653
27	YPW2814	m76.m90.TATA.26	1	SINGLE	1	2	2	C	11	C11	1	1	2	2	3	3	16130	13345	6109	5876	0.126443	50	5.48315	0.109729	3.03603	0.275758	0.553057	0.04967	0.054395	0.555861	-0.000511327	-0.000511327	0.55305	0.0496572	0.054395	5.48318	0.109742	0.524394	0.00967795	0.00998208	-0.645511	0.018441	0.018869	-2.7544	0.405576	5.48423	-2.70422	0.525661	0.384142
CTRL	YPW1002	REF	1	SINGLE	1	2	2	C	12	C12	1	1	2	2	3	3	15068	13751	6590	6522	0.369672	50	5.47078	0.101626	4.94232	0.136112	0.902373	0.0202845	0.0189167	0.903771	-0.000255663	-0.000255663	0.902377	0.0202827	0.0189166	5.47078	0.101626	0.877813	0.0599734	0.0559849	-0.130322	0.0681859	0.0633913	-0.0226597	0.148096	5.47183	0.0275164	0.897265	0.126662
34	YPW2834	m75.m90.TATA.22	1	SINGLE	1	2	2	D	1	D01	1	1	2	2	3	4	15560	13803	5974	5707	0.243317	50	5.47722	0.101422	3.1758	0.251057	0.578286	0.0439185	0.0476823	0.483054	0.0173869	0.0173851	0.578098	0.0437755	0.0476611	5.47709	0.100963	0.52972	0.0102757	0.0106088	-0.635407	0.0193554	0.0199154	-2.55853	0.354364	5.48366	-2.53674	0.530379	0.343109
CTRL	YPW1002	REF	1	SINGLE	1	2	2	D	2	D02	1	1	2	2	3	4	10450	9675	4180	4117	0.400438	50	5.47144	0.0976019	4.97146	0.116029	0.907622	0.0155879	0.0150191	0.936299	-0.00524115	-0.0052411	0.90778	0.015516	0.0150114	5.47144	0.0976711	0.894128	0.0477965	0.046553	-0.111906	0.0532806	0.0517423	0.0195934	0.118051	5.47802	0.0413794	0.902814	0.106796
5	YPW2458	m76.m63	1	SINGLE	1	2	2	D	3	D03	1	1	2	2	3	4	14773	11822	4993	4820	0.151448	50	5.48737	0.104873	2.96047	0.320505	0.5383	0.0587482	0.0644373	0.703193	-0.0300495	-0.0300405	0.538782	0.05844	0.0643991	5.4873	0.104652	0.521796	0.0099477	0.0111075	-0.650479	0.0191342	0.0209945	-2.86597	0.504572	5.49387	-2.84419	0.522281	0.493316
45	YPW3011	TATA.81_TATA.81	1	DOUBLE	1	2	2	D	4	D04	1	1	2	2	3	4	18102	16192	7269	7160	0.443257	50	5.48296	0.0891709	5.27681	0.224159	0.961432	0.0397492	0.0389248	1.00419	-0.00779789	-0.00779774	0.961561	0.0396361	0.0389204	5.48301	0.0893505	1.1003	0.182559	0.18906	0.0955843	0.168116	0.164433	0.440159	0.314827	5.48959	0.461945	1.11353	0.303572
26	YPW2812	m75.m63.TATA.26	1	SINGLE	1	2	2	D	5	D05	1	1	2	2	3	4	15890	11795	5405	5166	0.105243	50	5.48754	0.116787	2.88986	0.310644	0.525842	0.0566333	0.0607097	0.782772	-0.0468206	-0.0467864	0.526255	0.0563124	0.060565	5.48776	0.116732	0.519742	0.00881499	0.00863034	-0.654424	0.0169891	0.0165142	-2.96394	0.432396	5.49434	-2.94215	0.520181	0.421141
CTRL	YPW1002	REF	1	SINGLE	1	2	2	D	6	D06	1	1	2	2	3	4	14715	13642	6414	6327	0.270136	50	5.48128	0.105657	4.97678	0.130223	0.906617	0.0169418	0.0160747	0.867378	0.0071587	0.00715858	0.90661	0.0170964	0.0160595	5.48134	0.105643	0.890535	0.0518461	0.049502	-0.115932	0.0581929	0.0551496	0.0104407	0.126683	5.48792	0.0322268	0.899142	0.115428
48	YPW3015	TATA.129_TATA.129	1	DOUBLE	1	2	2	D	7	D07	1	1	2	2	3	4	18491	16587	7306	7207	0.329774	50	5.49197	0.0944118	5.2024	0.13013	0.946822	0.0190542	0.0178399	0.967182	-0.00370714	-0.00370712	0.946939	0.0189673	0.0178371	5.4919	0.0943914	1.03542	0.0797601	0.0739919	0.0348026	0.0769725	0.0714557	0.325814	0.138139	5.49847	0.3476	1.04721	0.126884
12	YPW2651	TATA.129	1	SINGLE	1	2	2	D	8	D08	1	1	2	2	3	4	11466	10603	4821	4701	0.244992	50	5.47484	0.101925	4.64582	0.128714	0.847663	0.0173572	0.0168133	0.765774	0.0149574	0.0149563	0.847468	0.017169	0.0167552	5.47499	0.101783	0.745845	0.0332089	0.0324475	-0.293237	0.044475	0.0432289	-0.452048	0.131867	5.48156	-0.430262	0.751265	0.120611
CTRL	YPW1002	REF	1	SINGLE	1	2	2	D	10	D10	1	1	2	2	3	4	12100	11089	5033	4980	0.205263	50	5.47302	0.104971	4.96372	0.128562	0.906399	0.017145	0.016114	0.889608	0.00306797	0.00306796	0.906327	0.0171902	0.0161112	5.47306	0.104999	0.889672	0.0519043	0.0494664	-0.116902	0.0587792	0.0551951	0.00822969	0.126873	5.47964	0.0300158	0.89826	0.115617
1	YPW1617	WT	1	SINGLE	1	2	2	D	11	D11	1	1	2	2	3	4	12568	11655	5326	5268	0.142452	50	5.48439	0.104596	5.06216	0.124122	0.922088	0.0158854	0.0151354	0.932604	-0.00191748	-0.00191748	0.92211	0.0158724	0.0151342	5.4844	0.104634	0.940888	0.0543711	0.0522217	-0.0609309	0.058016	0.0552836	0.13165	0.118388	5.49097	0.153436	0.950604	0.107133
20	YPW1960	m76	1	SINGLE	1	2	2	D	12	D12	1	1	2	2	3	4	17494	16075	7595	7425	0.241234	50	5.4798	0.103452	3.85211	0.217451	0.702398	0.0371444	0.037246	0.507579	0.0355522	0.0355372	0.701981	0.037341	0.0371109	5.47966	0.103517	0.578658	0.0228432	0.0231465	-0.547043	0.0396273	0.0394811	-1.58976	0.293453	5.48624	-1.56797	0.580396	0.282198
CTRL	YPW1002	REF	1	SINGLE	1	2	2	E	1	E01	2	1	2	2	4	1	15995	14849	6578	6512	0.209876	50	5.478	0.100044	4.98216	0.123547	0.908541	0.0155398	0.0150809	0.897337	0.00204531	0.00204531	0.908509	0.0155788	0.0150797	5.47802	0.100049	0.896382	0.048315	0.0469742	-0.109388	0.0538453	0.0521057	0.0252928	0.118442	5.47801	0.0448888	0.904231	0.114379
51	YPW2675	URA3	1	SINGLE	1	2	2	E	2	E02	2	1	2	2	4	1	17788	15811	7065	7019	0.219633	50	5.49771	0.0960832	4.98873	0.13435	0.907114	0.0179394	0.0170187	0.815744	0.0166197	0.0166181	0.906931	0.0179669	0.0169558	5.49783	0.0960407	0.891519	0.0549998	0.0516825	-0.114829	0.0618879	0.0578432	0.0129546	0.131932	5.49782	0.0325506	0.899271	0.127868
31	YPW2826	m75.TATA.26	1	SINGLE	1	2	2	E	3	E03	2	1	2	2	4	1	14346	12998	6065	5874	0.180568	51	5.48821	0.110018	3.59824	0.178752	0.655166	0.0274744	0.0284312	0.318695	0.061308	0.0612314	0.654473	0.0268927	0.0277814	5.48789	0.110018	0.554182	0.0114403	0.0116978	-0.590261	0.0206392	0.0210267	-1.96127	0.215032	5.48788	-1.94167	0.555259	0.210969
1	YPW1617	WT	1	SINGLE	1	2	2	E	4	E04	2	1	2	2	4	1	19715	18073	8719	8641	0.20516	50	5.48605	0.104406	5.06009	0.135122	0.921323	0.0178994	0.0167488	0.884154	0.00677519	0.00677508	0.921204	0.0178979	0.0167362	5.48602	0.104331	0.937776	0.0612682	0.0574443	-0.0642441	0.0652686	0.0609345	0.124569	0.131153	5.48601	0.144165	0.946444	0.12709
CTRL	YPW1002	REF	1	SINGLE	1	2	2	E	5	E05	2	1	2	2	4	1	17542	16297	7659	7596	0.281182	50	5.47951	0.0980964	4.97233	0.132458	0.906792	0.0176136	0.0167501	0.872469	0.00626384	0.00626376	0.906706	0.0174892	0.0167405	5.47943	0.0979846	0.89083	0.0533587	0.0515689	-0.115602	0.0598353	0.0574443	0.0111931	0.131874	5.47942	0.0307891	0.898568	0.127811
11	YPW2550	TATA.26	1	SINGLE	1	2	2	E	6	E06	2	1	2	2	4	1	16355	15065	7448	7335	0.457007	50	5.47192	0.0993523	3.93049	0.138486	0.718083	0.0199629	0.0195501	0.45838	0.0474612	0.0474256	0.71755	0.0196914	0.0190748	5.4721	0.0989886	0.58887	0.0137353	0.01324	-0.529549	0.0233606	0.0224263	-1.46801	0.148617	5.47209	-1.44841	0.590633	0.144553
50	YPW2671	URA3	1	DOUBLE	1	2	2	E	7	E07	2	1	2	2	4	1	17579	15870	7947	7725	0.712778	50	5.48908	0.0886684	5.74207	0.1477	1.04616	0.0226603	0.0218037	1.12124	-0.0136788	-0.013678	1.04635	0.0224975	0.0217767	5.48909	0.0888646	1.66523	0.206769	0.191433	0.509962	0.123529	0.117115	1.10322	0.164257	5.48908	1.12282	1.68829	0.160194
2	YPW1002	REF	1	SINGLE	1	2	2	E	8	E08	2	1	2	2	4	1	15506	14356	6579	6489	0.42464	50	5.47878	0.0959253	4.96578	0.128482	0.905331	0.0176178	0.0168722	0.881518	0.00434631	0.00434628	0.905319	0.0176542	0.0168678	5.47887	0.0959672	0.88661	0.0530516	0.0514868	-0.12035	0.0600363	0.0575826	0.000344621	0.1331	5.47885	0.0199406	0.894265	0.129037
CTRL	YPW1002	REF	1	SINGLE	1	2	2	E	9	E09	2	1	2	2	4	1	19597	17768	8843	8774	0.256789	50	5.48314	0.10774	4.97688	0.137304	0.907124	0.0186681	0.0173241	0.834925	0.0131674	0.0131667	0.90699	0.018585	0.0172764	5.48315	0.107791	0.8917	0.0571112	0.053054	-0.114626	0.0639895	0.0591671	0.0134161	0.13537	5.48314	0.0330121	0.899456	0.131307
51	YPW2675	URA3	1	SINGLE	1	2	2	E	10	E10	2	1	2	2	4	1	10469	9393	4586	4564	0.418474	50	5.48729	0.0961242	4.98493	0.136013	0.908026	0.0189434	0.0179659	0.842087	0.0120168	0.0120162	0.907946	0.0190428	0.0179346	5.48731	0.0962001	0.894639	0.0589861	0.0549509	-0.111335	0.0656827	0.0613298	0.0208877	0.139167	5.4873	0.0404837	0.902453	0.135104
33	YPW2832	m76.m90.TATA.22	1	SINGLE	1	2	2	E	11	E11	2	1	2	2	4	1	17525	14425	6897	6586	0.226364	50	5.48394	0.107951	3.05423	0.292815	0.555866	0.051955	0.0554345	0.452102	0.0189214	0.0189191	0.555803	0.0518523	0.0554109	5.48329	0.108053	0.52493	0.0102517	0.0100705	-0.644491	0.019524	0.019084	-2.73287	0.400455	5.48328	-2.71327	0.525427	0.396392
15	YPW2528	TATA.2	1	SINGLE	1	2	2	E	12	E12	2	1	2	2	4	1	15469	14172	6632	6502	0.334968	50	5.46662	0.102251	4.72287	0.128634	0.863414	0.0169866	0.0166834	0.809604	0.00984336	0.00984304	0.863267	0.0169962	0.0166573	5.46657	0.102241	0.778203	0.0369685	0.0364782	-0.250767	0.047633	0.0465781	-0.328501	0.131018	5.46656	-0.308905	0.783713	0.126955
10	YPW2478	m63.m89	1	SINGLE	1	2	2	F	1	F01	2	1	2	2	4	2	11740	10934	4612	4509	0.173505	50	5.46993	0.0949067	3.92793	0.247528	0.717801	0.0424512	0.0433177	0.587719	0.0237812	0.0237767	0.717651	0.0424263	0.0432779	5.46987	0.0945779	0.588941	0.0294553	0.0307675	-0.529429	0.0501098	0.0511214	-1.46721	0.345085	5.47195	-1.45155	0.590349	0.341481
2	YPW1002	REF	1	SINGLE	1	2	2	F	2	F02	2	1	2	2	4	2	12847	11934	5206	5124	0.206983	50	5.47359	0.100613	4.9852	0.119447	0.910093	0.0150088	0.0144402	0.905895	0.000766991	0.00076699	0.910094	0.0149911	0.01444	5.47358	0.100609	0.901328	0.0469382	0.0457881	-0.103886	0.0520526	0.0504039	0.037686	0.11403	5.47566	0.0533544	0.907669	0.110425
CTRL	YPW1002	REF	1	SINGLE	1	2	2	F	3	F03	2	1	2	2	4	2	16950	15615	6979	6920	0.349179	50	5.47899	0.0990048	4.97971	0.122852	0.907901	0.0164097	0.0155539	0.885488	0.00409064	0.00409061	0.907883	0.0164167	0.0155494	5.47894	0.098994	0.894446	0.0505174	0.0482971	-0.111551	0.0564598	0.0536323	0.0203988	0.122375	5.48103	0.0360673	0.900679	0.118771
36	YPW2840	m63.m89.TATA.22	1	SINGLE	1	2	2	F	4	F04	2	1	2	2	4	2	14671	13198	5977	5752	0.225718	50	5.47036	0.101683	3.40483	0.275428	0.622253	0.0479028	0.0494528	0.386447	0.043106	0.0430793	0.621732	0.0480398	0.0493276	5.47014	0.102044	0.541894	0.0157289	0.0158693	-0.612685	0.0291352	0.0289796	-2.21731	0.376837	5.47222	-2.20164	0.542559	0.373232
2	YPW1002	REF	1	SINGLE	1	2	2	F	5	F05	2	1	2	2	4	2	12252	11272	5227	5159	0.236164	50	5.47607	0.104111	4.97903	0.123763	0.908139	0.0160255	0.0155332	0.91724	-0.00166181	-0.00166181	0.908179	0.0160109	0.0155323	5.47606	0.10414	0.89536	0.0492429	0.0482614	-0.110529	0.0551469	0.0535822	0.0227126	0.122002	5.47814	0.0383811	0.901607	0.118398
52	YPW2676	URA3	2	SINGLE	1	2	2	F	6	F06	2	1	2	2	4	2	17466	15573	6872	6832	0.233851	50	5.49421	0.102544	5.00432	0.127141	0.91042	0.0169794	0.0160907	0.868981	0.00754221	0.00754207	0.910337	0.0170292	0.0160747	5.49428	0.102569	0.902091	0.0534616	0.0505426	-0.10304	0.059307	0.0558136	0.0395833	0.125632	5.49637	0.0552517	0.908444	0.122027
CTRL	YPW1002	REF	1	SINGLE	1	2	2	F	7	F07	2	1	2	2	4	2	14635	13464	6230	6166	0.307234	50	5.48101	0.106891	4.98282	0.129462	0.908241	0.0161124	0.0155208	0.852187	0.0102269	0.0102265	0.908198	0.0162807	0.0154883	5.48095	0.106799	0.895419	0.0499332	0.0484924	-0.110464	0.0558643	0.0536604	0.02286	0.122568	5.48303	0.0385284	0.901666	0.118963
30	YPW2824	m63.m89.TATA.26	1	SINGLE	1	2	2	F	8	F08	2	1	2	2	4	2	12894	11539	5252	4988	0.143231	50	5.48057	0.10545	3.18384	0.276462	0.580214	0.0487617	0.0506562	0.386069	0.0354242	0.0354094	0.579651	0.0481796	0.050567	5.48048	0.105958	0.530085	0.0115304	0.011493	-0.634717	0.0217001	0.0215294	-2.54638	0.379267	5.48256	-2.53071	0.530564	0.375662
50	YPW2671	URA3	1	DOUBLE	1	2	2	F	9	F09	2	1	2	2	4	2	17933	15956	7240	7069	0.335554	50	5.49174	0.0924731	5.77045	0.142151	1.05032	0.0207807	0.0208001	1.14159	-0.0166197	-0.0166181	1.05041	0.0204857	0.0207522	5.49172	0.0924939	1.70277	0.194422	0.188817	0.532258	0.113479	0.1128	1.13493	0.156957	5.4938	1.1506	1.72177	0.153352
1	YPW1617	WT	1	SINGLE	1	2	2	F	10	F10	2	1	2	2	4	2	10797	9918	4423	4333	0.620362	50	5.47461	0.101988	5.03847	0.124468	0.919847	0.0164346	0.0154444	0.920546	-0.000127832	-0.000127832	0.91983	0.016444	0.0154444	5.47461	0.101984	0.933094	0.0556914	0.0526359	-0.0692489	0.0595989	0.0560457	0.113823	0.121473	5.47669	0.129491	0.939937	0.117869
CTRL	YPW1002	REF	1	SINGLE	1	2	2	F	11	F11	2	1	2	2	4	2	11551	10574	4767	4716	0.466143	50	5.47514	0.104294	4.96583	0.127125	0.906128	0.0169544	0.0163711	0.915927	-0.00178965	-0.00178964	0.906203	0.0169694	0.0163702	5.47515	0.10434	0.889296	0.05174	0.0500718	-0.117325	0.0583087	0.0559596	0.00726288	0.12855	5.47723	0.0229313	0.895447	0.124945
46	YPW3012	m75_TATA.81	1	DOUBLE	1	2	2	F	12	F12	2	1	2	2	4	2	17939	16182	7286	7161	0.433085	51	5.49135	0.0958496	5.1729	0.139766	0.941603	0.0197642	0.0189952	0.931073	0.00191748	0.00191748	0.941641	0.0197487	0.0189944	5.49132	0.0958773	1.01368	0.0796746	0.0758819	0.0135867	0.0786529	0.0746356	0.284388	0.14766	5.49341	0.300056	1.02179	0.144055
17	YPW2566	TATA.42	1	SINGLE	1	2	2	G	1	G01	2	1	2	2	4	3	20417	18647	8380	8222	0.397639	50	5.47298	0.0971967	4.18109	0.126527	0.763103	0.0168141	0.0168399	0.585337	0.0324807	0.0324693	0.762852	0.0168203	0.0165887	5.47296	0.0972855	0.626744	0.0166126	0.0166471	-0.467217	0.0265473	0.0264219	-1.11375	0.131119	5.47287	-1.09562	0.629067	0.125184
7	YPW2460	m76.m90	1	SINGLE	1	2	2	G	2	G02	2	1	2	2	4	3	15256	13799	6213	6030	0.280296	50	5.47173	0.0989489	3.39454	0.282893	0.619375	0.0497232	0.0524183	0.466153	0.0280025	0.0279951	0.618726	0.0498589	0.0523736	5.47174	0.099043	0.540916	0.0159756	0.0172543	-0.614492	0.0296026	0.0313537	-2.24082	0.419472	5.47165	-2.22269	0.541668	0.413536
3	YPW978	NEGATIVE	1	NONE	1	2	2	G	3	G03	2	1	2	2	4	3	16937	12281	5635	5434	-0.0480874	51	5.4932	0.115349	2.87651	0.304862	0.521934	0.0554675	0.0609578	0.829117	-0.0559206	-0.0558625	0.523329	0.0549037	0.0607445	5.49404	0.115784	0.51929	0.00851723	0.00846571	-0.655293	0.0163734	0.0162115	-2.98681	0.433962	5.49395	-2.96868	0.519647	0.428026
CTRL	YPW1002	REF	1	SINGLE	1	2	2	G	4	G04	2	1	2	2	4	3	12759	11777	5361	5269	0.242823	50	5.48085	0.10095	4.97525	0.125731	0.90699	0.0162326	0.0159769	0.867754	0.0071587	0.00715858	0.906928	0.0162185	0.0159631	5.48081	0.100865	0.891509	0.0495687	0.0492119	-0.11484	0.0556364	0.0548138	0.0129292	0.125628	5.48071	0.0310583	0.898675	0.119693
22	YPW1896	m63	1	SINGLE	1	2	2	G	5	G05	2	1	2	2	4	3	17862	16125	7589	7530	0.277623	50	5.47793	0.105653	4.7763	0.14943	0.870681	0.0199531	0.0191963	0.727096	0.0262115	0.0262055	0.870304	0.0196386	0.0190271	5.47802	0.105511	0.793955	0.0451416	0.0442048	-0.230729	0.0568687	0.0551604	-0.273469	0.150268	5.47793	-0.25534	0.799336	0.144333
29	YPW2816	m76.TATA.26	1	SINGLE	1	2	2	G	6	G06	2	1	2	2	4	3	15123	13620	6185	5915	0.28604	50	5.47914	0.10926	3.30835	0.225511	0.602709	0.0383288	0.0408698	0.34898	0.0463081	0.0462751	0.601867	0.0381139	0.0406426	5.47881	0.109301	0.535835	0.0107628	0.0108697	-0.623929	0.020112	0.0202124	-2.37265	0.301493	5.47871	-2.35452	0.536495	0.295557
CTRL	YPW1002	REF	1	SINGLE	1	2	2	G	8	G08	2	1	2	2	4	3	16112	14862	6853	6791	0.305223	50	5.48011	0.100121	4.98025	0.133176	0.907943	0.017826	0.0168279	0.851198	0.0103547	0.0103544	0.907837	0.0178102	0.0168008	5.48003	0.100128	0.894302	0.0542681	0.0523084	-0.111712	0.0608014	0.0579992	0.0200332	0.132588	5.47994	0.0381622	0.901519	0.126652
6	YPW2465	m75.m63	1	SINGLE	1	2	2	G	9	G09	2	1	2	2	4	3	15431	12729	5643	5427	0.115067	50	5.48331	0.11001	3.04021	0.325206	0.55253	0.0589505	0.0637201	0.570754	-0.00332364	-0.00332363	0.552525	0.0589585	0.0637195	5.48329	0.109898	0.524293	0.0111735	0.0124931	-0.645704	0.0213479	0.0234724	-2.75851	0.509692	5.4832	-2.74038	0.524742	0.503757
41	YPW3022	m63.m89_m63.m89	1	DOUBLE	1	2	2	G	10	G10	2	1	2	2	4	3	16645	14740	6370	6235	0.232545	50	5.49192	0.0957477	4.9262	0.158112	0.89611	0.0239375	0.0244799	0.830818	0.0118889	0.0118884	0.896203	0.0239606	0.0244585	5.49173	0.0955161	0.859994	0.0677608	0.0689844	-0.15083	0.0787951	0.0793275	-0.0709438	0.191511	5.49163	-0.0528148	0.866584	0.185575
29	YPW2816	m76.TATA.26	1	SINGLE	1	2	2	G	11	G11	2	1	2	2	4	3	16573	14898	7154	6845	0.256166	50	5.48486	0.111665	3.31027	0.230153	0.602974	0.0387669	0.040726	0.302587	0.0547666	0.054712	0.601988	0.0386696	0.040392	5.48446	0.111595	0.535869	0.0107954	0.010767	-0.623865	0.0201545	0.0200332	-2.3717	0.298362	5.48437	-2.35357	0.536529	0.292426
CTRL	YPW1002	REF	1	SINGLE	1	2	2	G	12	G12	2	1	2	2	4	3	15932	14619	6740	6537	0.383795	50	5.47962	0.106575	4.985	0.128109	0.909032	0.0157645	0.0152174	0.874008	0.00639167	0.00639159	0.90905	0.0158145	0.0152045	5.47956	0.106572	0.898064	0.0489863	0.0475862	-0.107514	0.0546276	0.0526723	0.0295237	0.119479	5.47946	0.0476527	0.90535	0.113543
44	YPW3028	m75_m75	1	DOUBLE	1	2	2	H	1	H01	2	1	2	2	4	4	13248	11634	5430	5337	0.384019	50	5.4874	0.0939633	5.09386	0.150196	0.927426	0.0215977	0.0209959	0.836929	0.0164918	0.0164903	0.927203	0.0217351	0.0209497	5.48753	0.0940946	0.958811	0.0780635	0.0747849	-0.0420612	0.0816169	0.0776325	0.171478	0.16292	5.49269	0.179026	0.962289	0.159484
CTRL	YPW1002	REF	1	SINGLE	1	2	2	H	2	H02	2	1	2	2	4	4	19671	17913	8488	8398	0.276025	50	5.48476	0.10568	4.9921	0.132874	0.90934	0.0164865	0.0156064	0.86587	0.00792573	0.00792557	0.909206	0.0163653	0.0155868	5.48472	0.105664	0.89855	0.0507532	0.0489743	-0.106973	0.0566578	0.0541049	0.0307443	0.122814	5.48988	0.0382925	0.901572	0.119378
2	YPW1002	REF	1	SINGLE	1	2	2	H	3	H03	2	1	2	2	4	4	20123	18548	9071	8995	0.436294	50	5.48054	0.101382	4.98945	0.129042	0.909626	0.0170059	0.0162278	0.840265	0.012656	0.0126553	0.909506	0.0169265	0.0161862	5.48053	0.101258	0.899487	0.0527468	0.0508715	-0.10593	0.0587973	0.0561804	0.0330913	0.127273	5.48568	0.0406394	0.902516	0.123837
38	YPW3006	m63.m90_m63.m90	1	DOUBLE	1	2	2	H	4	H04	2	1	2	2	4	4	17836	15705	7150	6823	0.287339	50	5.49472	0.0947589	5.1954	0.163574	0.945314	0.0243004	0.0256539	0.952338	-0.00127832	-0.00127832	0.945294	0.024313	0.0256537	5.49469	0.0947388	1.02857	0.100265	0.103228	0.0281676	0.0978264	0.100511	0.312948	0.195217	5.49984	0.320496	1.03257	0.191781
14	YPW2546	TATA.22	1	SINGLE	1	2	2	H	5	H05	2	1	2	2	4	4	10935	9935	4766	4673	0.102579	50	5.4516	0.119774	4.52204	0.135893	0.828937	0.0177274	0.0176209	0.79688	0.00588033	0.00588026	0.82884	0.0176743	0.0176085	5.45154	0.119846	0.71249	0.0293884	0.0300048	-0.33899	0.0411516	0.0416127	-0.597717	0.141061	5.45669	-0.590169	0.714102	0.137625
CTRL	YPW1002	REF	1	SINGLE	1	2	2	H	6	H06	2	1	2	2	4	4	15603	14341	6498	6394	0.17359	50	5.47342	0.101705	4.98963	0.12237	0.910245	0.0155416	0.0150812	0.901849	0.00153398	0.00153398	0.910247	0.0155364	0.0150805	5.47343	0.101704	0.90181	0.0488286	0.0477657	-0.103352	0.0542853	0.0525914	0.0388848	0.118812	5.47859	0.0464329	0.904856	0.115376
18	YPW2605	TATA.81	1	SINGLE	1	2	2	H	7	H07	2	1	2	2	4	4	17912	16482	7670	7568	0.206266	50	5.48165	0.106178	4.37024	0.136474	0.796626	0.0176049	0.0169423	0.605249	0.0349122	0.0348981	0.796225	0.0171033	0.0165895	5.48155	0.10607	0.664604	0.0219288	0.0215464	-0.408564	0.0329247	0.0322464	-0.852769	0.130725	5.48671	-0.845221	0.665853	0.12729
47	YPW3034	m66_m66	1	DOUBLE	1	2	2	H	8	H08	2	1	2	2	4	4	19661	17735	8139	7987	0.466334	50	5.48939	0.0944126	5.32193	0.134528	0.968262	0.0178714	0.0177194	0.955631	0.00230097	0.00230097	0.96827	0.0177906	0.0177182	5.48934	0.0943455	1.13265	0.0879643	0.0883947	0.124557	0.0777138	0.0772696	0.492621	0.139674	5.49449	0.500169	1.13744	0.136238
35	YPW2836	m76.TATA.22	1	SINGLE	1	2	2	H	9	H09	2	1	2	2	4	4	15384	14033	6485	6227	0.24074	50	5.48155	0.109302	3.36436	0.236494	0.612613	0.0411813	0.0422151	0.393874	0.0399047	0.0398835	0.612131	0.0407637	0.042052	5.48133	0.109296	0.538848	0.0124497	0.0126464	-0.618321	0.0231946	0.023301	-2.29238	0.32372	5.48649	-2.28483	0.539144	0.320284
CTRL	YPW1002	REF	1	SINGLE	1	2	2	H	10	H10	2	1	2	2	4	4	16070	14582	6754	6656	0.26541	50	5.47261	0.10455	4.97878	0.130287	0.908828	0.0161754	0.0157064	0.869651	0.0071587	0.00715858	0.90873	0.0162389	0.0156908	5.47264	0.104517	0.897066	0.050124	0.0490177	-0.108625	0.0561572	0.0542836	0.0270164	0.123382	5.4778	0.0345646	0.900077	0.119946
2	YPW1002	REF	1	SINGLE	1	2	2	H	11	H11	2	1	2	2	4	4	16707	15280	7170	7085	0.424759	50	5.48135	0.103136	4.98897	0.129588	0.909475	0.0164284	0.0159826	0.889856	0.0035793	0.00357929	0.909338	0.0164032	0.0159791	5.48129	0.103088	0.898961	0.0509921	0.0502695	-0.106516	0.0568606	0.0554928	0.0317728	0.125932	5.48644	0.039321	0.901985	0.122496
9	YPW2475	m63.m90	1	SINGLE	1	2	2	H	12	H12	2	1	2	2	4	4	16225	14905	7087	6878	0.180594	50	5.48395	0.11029	3.69644	0.292667	0.673543	0.0505607	0.0507435	0.355624	0.0579726	0.0579078	0.673309	0.0499324	0.0504788	5.48396	0.110657	0.562815	0.0246869	0.0249757	-0.574804	0.0438718	0.0435987	-1.81397	0.396231	5.48911	-1.80643	0.563293	0.392795
CTRL	YPW1002	REF	1	SINGLE	1	3	3	A	1	A01	1	1	3	3	5	1	11810	10852	5699	5650	0.892773	50	5.47402	0.0940745	4.96952	0.114536	0.907309	0.0151921	0.0149005	0.924803	-0.0031958	-0.00319579	0.907291	0.0151893	0.014898	5.47403	0.0940895	0.892621	0.0465282	0.0461639	-0.113593	0.0521218	0.0513342	0.0157648	0.117513	5.47904	0.00352164	0.887841	0.123539
21	YPW1897	m66	1	SINGLE	1	3	3	A	2	A02	1	1	3	3	5	1	15360	14168	6363	6233	0.186289	50	5.47112	0.109995	4.6264	0.155676	0.845463	0.0218401	0.0225967	0.741942	0.0189214	0.0189191	0.845292	0.0217705	0.0225193	5.47094	0.109896	0.741692	0.0411509	0.0422576	-0.298821	0.0554256	0.0566585	-0.469069	0.174683	5.47596	-0.481312	0.738749	0.180708
13	YPW2656	TATA.135	1	SINGLE	1	3	3	A	3	A03	1	1	3	3	5	1	16950	15570	6702	6523	0.218878	50	5.46716	0.101871	4.23134	0.126216	0.773592	0.0172586	0.0166042	0.645675	0.0233975	0.0233932	0.773203	0.0167887	0.0164618	5.46702	0.101711	0.637448	0.0180369	0.0178404	-0.450282	0.0282632	0.0278591	-1.0328	0.129592	5.47203	-1.04505	0.635773	0.135617
1	YPW1617	WT	1	SINGLE	1	3	3	A	4	A04	1	1	3	3	5	1	12280	11399	5124	4979	0.234679	50	5.47784	0.111901	5.08271	0.123831	0.927496	0.0145049	0.0140036	0.952005	-0.00447414	-0.00447411	0.927612	0.0145085	0.0139961	5.4778	0.11189	0.960282	0.0519526	0.050806	-0.0405286	0.0542204	0.0525311	0.174676	0.110328	5.48281	0.162433	0.954678	0.116353
CTRL	YPW1002	REF	1	SINGLE	1	3	3	A	5	A05	1	1	3	3	5	1	14043	12929	5801	5729	0.167423	50	5.47407	0.113294	4.99396	0.124653	0.911777	0.0148757	0.0145226	0.93277	-0.00383497	-0.00383495	0.911834	0.014817	0.0145171	5.47412	0.113205	0.906828	0.0469081	0.0465057	-0.0978023	0.0519618	0.0509558	0.0512906	0.114252	5.47913	0.0390474	0.901875	0.120277
32	YPW2828	m75.m63.TATA.22	1	SINGLE	1	3	3	A	7	A07	1	1	3	3	5	1	13237	9740	4181	4049	-0.153484	50	5.48458	0.115232	2.92531	0.330135	0.532279	0.0596377	0.0636547	0.789773	-0.0469487	-0.0469142	0.533433	0.0596635	0.063523	5.48523	0.115107	0.520894	0.00975318	0.00996831	-0.652209	0.0187173	0.0189662	-2.9078	0.472167	5.49024	-2.92005	0.520637	0.478193
24	YPW1901	m90	1	SINGLE	1	3	3	A	8	A08	1	1	3	3	5	1	11538	10677	4501	4344	0.127319	50	5.4655	0.104148	4.81704	0.121399	0.880894	0.0162073	0.0156178	0.85155	0.00536898	0.00536893	0.880827	0.016081	0.0156096	5.46546	0.104035	0.819186	0.040223	0.0392496	-0.199445	0.0491715	0.0476023	-0.191181	0.122884	5.47047	-0.203424	0.815299	0.128909
CTRL	YPW1002	REF	1	SINGLE	1	3	3	A	9	A09	1	1	3	3	5	1	7923	7300	3124	3074	-0.0498245	50	5.47776	0.119548	5.02484	0.130894	0.915977	0.0134905	0.0131848	0.882365	0.006136	0.00613592	0.915862	0.01342	0.0131678	5.47771	0.119549	0.919854	0.0440177	0.0435633	-0.0835398	0.0479746	0.0470662	0.082791	0.103704	5.48272	0.0705479	0.914743	0.10973
19	YPW1898	m75	1	SINGLE	1	3	3	A	10	A10	1	1	3	3	5	1	11390	10381	4503	4394	0.0858619	50	5.46484	0.110541	4.31843	0.167676	0.78883	0.0260208	0.0258592	0.686826	0.0186656	0.0186634	0.788672	0.0259009	0.0257884	5.46481	0.110361	0.655152	0.0317188	0.0316363	-0.422889	0.0482089	0.047769	-0.911831	0.20362	5.46982	-0.924074	0.653261	0.209646
42	YPW3025	TATA.42_TATA.42	1	DOUBLE	1	3	3	A	11	A11	1	1	3	3	5	1	15972	14471	6102	6001	0.105119	50	5.47855	0.101403	4.5374	0.120551	0.82778	0.0153231	0.01505	0.745135	0.0150853	0.0150841	0.827563	0.0151362	0.0149844	5.47863	0.10157	0.710375	0.024747	0.0248396	-0.341962	0.034943	0.0347833	-0.607707	0.11795	5.48365	-0.61995	0.707813	0.123976
4	YPW2455	m76.m66	1	SINGLE	1	3	3	A	12	A12	1	1	3	3	5	1	16761	11941	5648	5394	0.113385	50	5.48908	0.126094	2.95809	0.342247	0.537759	0.0620498	0.0669301	0.810938	-0.0497676	-0.0497265	0.538485	0.0623677	0.0667579	5.48985	0.126326	0.521745	0.0107278	0.0112203	-0.650577	0.0205574	0.0212004	-2.8683	0.510884	5.49486	-2.88054	0.521477	0.51691
40	YPW3021	m63.m90_TATA.26	1	DOUBLE	1	3	3	B	1	B01	1	1	3	3	5	2	19923	17753	8068	7950	0.241407	50	5.49054	0.102186	4.62655	0.13864	0.841476	0.0193132	0.0189237	0.714415	0.0231417	0.0231375	0.841256	0.0193236	0.0188037	5.49045	0.102134	0.734178	0.0353692	0.0348636	-0.309004	0.0482038	0.0470635	-0.500625	0.148738	5.49862	-0.515063	0.730818	0.154726
11	YPW2550	TATA.26	1	SINGLE	1	3	3	B	2	B02	1	1	3	3	5	2	14701	13609	6231	6029	0.338809	50	5.47124	0.104744	3.95516	0.14138	0.72214	0.0190519	0.0188817	0.507315	0.0392645	0.0392443	0.721762	0.0187018	0.018497	5.47116	0.105164	0.591854	0.0134155	0.0133301	-0.524496	0.0226508	0.0224472	-1.43507	0.14478	5.47933	-1.44951	0.590534	0.150768
CTRL	YPW1002	REF	1	SINGLE	1	3	3	B	3	B03	1	1	3	3	5	2	12279	11344	4901	4738	0.16412	50	5.47598	0.104221	4.9965	0.120962	0.911833	0.0148754	0.0144834	0.913233	-0.000255663	-0.000255663	0.911829	0.0149002	0.0144834	5.47598	0.104221	0.906812	0.047217	0.0464177	-0.0978202	0.0522812	0.0508526	0.0512507	0.11404	5.48415	0.0368123	0.900977	0.120028
49	YPW3040	m66_TATA.129	1	DOUBLE	1	3	3	B	4	B04	1	1	3	3	5	2	15653	13731	6159	6086	0.36126	50	5.48931	0.0962391	5.04485	0.126069	0.918096	0.0161711	0.0155785	0.892835	0.00460198	0.00460194	0.917997	0.0162571	0.0155733	5.48924	0.096235	0.926927	0.053739	0.0524349	-0.07588	0.058364	0.0561352	0.0994884	0.122757	5.49741	0.08505	0.920804	0.128744
43	YPW3010	m63.m89_TATA.42	1	DOUBLE	1	3	3	B	5	B05	1	1	3	3	5	2	18934	17043	7310	7116	0.198755	50	5.48889	0.100211	5.15548	0.129931	0.938036	0.0172702	0.0178394	0.970312	-0.00588033	-0.00588026	0.938203	0.0171766	0.0178311	5.48884	0.100182	1.00005	0.0678732	0.0691236	4.58e-05	0.0676032	0.0690106	0.2575	0.138174	5.49701	0.243061	0.992875	0.144162
16	YPW2653	m75.TATA.42	1	SINGLE	1	3	3	B	6	B06	1	1	3	3	5	2	16968	15505	6783	6531	0.217975	50	5.47061	0.105633	3.75035	0.167046	0.684072	0.0268507	0.0269053	0.434242	0.0456676	0.0456359	0.683071	0.0265378	0.0265552	5.47065	0.105457	0.567816	0.0141595	0.0140592	-0.565958	0.024978	0.0246449	-1.73763	0.20665	5.47883	-1.75207	0.566841	0.212638
CTRL	YPW1002	REF	1	SINGLE	1	3	3	B	7	B07	1	1	3	3	5	2	10904	10084	4890	4766	0.459677	50	5.46786	0.095552	4.98355	0.115641	0.910508	0.0148243	0.0143271	0.930778	-0.00370714	-0.00370712	0.910509	0.0149369	0.0143233	5.46786	0.0955303	0.902632	0.0469528	0.0457009	-0.10244	0.0519756	0.0501692	0.0409291	0.113444	5.47604	0.0264907	0.896858	0.119432
8	YPW2469	m75.m90	1	SINGLE	1	3	3	B	8	B08	1	1	3	3	5	2	7639	7034	2882	2792	0.130936	50	5.46681	0.111383	3.60676	0.254698	0.659426	0.0441198	0.0437939	0.52802	0.024037	0.0240324	0.658919	0.0434011	0.043736	5.46632	0.111168	0.556107	0.019017	0.019029	-0.586795	0.0342979	0.0338588	-1.9265	0.337844	5.47449	-1.94094	0.555299	0.343832
52	YPW2676	URA3	2	SINGLE	1	3	3	B	9	B09	1	1	3	3	5	2	19298	17380	7822	7755	0.236055	50	5.49474	0.102637	5.01463	0.12685	0.911847	0.0153799	0.0148149	0.865487	0.0084371	0.00843689	0.911808	0.0152866	0.0147927	5.4947	0.1026	0.906748	0.0487286	0.0473389	-0.0978907	0.0536167	0.0518896	0.0510936	0.116321	5.50287	0.0366552	0.900914	0.122309
3	YPW978	NEGATIVE	1	NONE	1	3	3	B	10	B10	1	1	3	3	5	2	13522	9110	3913	3730	-0.065838	50	5.48392	0.116404	2.90282	0.348953	0.527352	0.0631529	0.0663357	0.914254	-0.070552	-0.0704353	0.529169	0.0635394	0.0660324	5.48546	0.117412	0.520202	0.0101504	0.00975992	-0.653539	0.0195485	0.0186078	-2.94115	0.477973	5.49363	-2.95559	0.519909	0.483961
CTRL	YPW1002	REF	1	SINGLE	1	3	3	B	11	B11	1	1	3	3	5	2	9571	8672	3763	3688	0.0906594	50	5.4734	0.115132	5.00469	0.127578	0.913527	0.015405	0.0149143	0.906531	0.00127832	0.00127832	0.913499	0.0153869	0.0149137	5.47341	0.115131	0.912163	0.0496519	0.0481494	-0.0919364	0.0542224	0.0525654	0.064312	0.116759	5.48158	0.0498736	0.906252	0.122747
25	YPW1903	m91	1	SINGLE	1	3	3	B	12	B12	1	1	3	3	5	2	15871	14709	7326	7262	0.494477	50	5.47824	0.110569	4.87978	0.136545	0.889671	0.0180702	0.0172418	0.835747	0.00984336	0.00984304	0.889562	0.0182493	0.0172139	5.47832	0.110599	0.841766	0.0482783	0.0468371	-0.172253	0.0576792	0.0549947	-0.122872	0.136957	5.4865	-0.13731	0.836864	0.142945
23	YPW1892	m89	1	SINGLE	1	3	3	C	1	C01	1	1	3	3	5	3	16627	15436	7075	7004	0.248604	50	5.47522	0.108449	4.86734	0.132024	0.887799	0.0158614	0.0153453	0.819205	0.0125282	0.0125275	0.887603	0.0159041	0.0152946	5.47526	0.108294	0.836567	0.0419375	0.0408682	-0.178448	0.0502322	0.0483846	-0.13819	0.121348	5.48116	-0.148632	0.833069	0.127321
2	YPW1002	REF	1	SINGLE	1	3	3	C	2	C02	1	1	3	3	5	3	10651	9783	4070	4006	0.0912287	50	5.47063	0.104849	5.00107	0.120246	0.913327	0.0134509	0.0133346	0.90074	0.00230097	0.00230097	0.913363	0.0134968	0.0133326	5.47062	0.104834	0.911725	0.043471	0.0430259	-0.0924169	0.0476599	0.0470095	0.0632488	0.104446	5.47652	0.0528073	0.907446	0.110419
50	YPW2671	URA3	1	DOUBLE	1	3	3	C	3	C03	1	1	3	3	5	3	14101	13007	5826	5625	0.287626	50	5.4797	0.102246	5.76745	0.129368	1.05117	0.0169513	0.0178078	1.20392	-0.0278745	-0.0278673	1.05175	0.0167325	0.0176137	5.47983	0.102276	1.7155	0.159787	0.164509	0.539706	0.0928577	0.0966159	1.14546	0.135318	5.48573	1.13501	1.70287	0.141291
CTRL	YPW1002	REF	1	SINGLE	1	3	3	C	4	C04	1	1	3	3	5	3	15046	13871	6281	6192	0.226664	50	5.47708	0.113497	4.99564	0.126848	0.911353	0.0145748	0.0141869	0.905052	0.00115049	0.00115049	0.91133	0.0145807	0.0141864	5.47707	0.113488	0.905227	0.0460489	0.0454184	-0.0995697	0.051011	0.0497876	0.0473487	0.112021	5.48297	0.0369071	0.901015	0.117994
39	YPW3019	TATA.26_TATA.26	1	DOUBLE	1	3	3	C	6	C06	1	1	3	3	5	3	19362	17541	7347	7247	0.279998	50	5.48492	0.0960881	4.46598	0.119062	0.813905	0.0161437	0.0154493	0.710824	0.0187935	0.0187913	0.813739	0.0161144	0.0153566	5.48487	0.0960079	0.688797	0.0237134	0.0227848	-0.372808	0.0344531	0.0329407	-0.715808	0.120545	5.49077	-0.726249	0.686834	0.126518
28	YPW2820	m75.m90.TATA.26	1	SINGLE	1	3	3	C	7	C07	1	1	3	3	5	3	14465	12528	5295	5023	0.145489	50	5.47471	0.10851	3.16702	0.259757	0.57743	0.0465943	0.0490095	0.545237	0.00588033	0.00588026	0.577382	0.0465588	0.0490067	5.47463	0.108402	0.529553	0.0107358	0.010658	-0.635723	0.0203486	0.0200194	-2.56412	0.358007	5.48053	-2.57456	0.529243	0.36398
CTRL	YPW1002	REF	1	SINGLE	1	3	3	C	8	C08	1	1	3	3	5	3	11609	10784	4454	4368	0.218452	50	5.47906	0.0947543	5.00008	0.115641	0.911791	0.0147695	0.0140772	0.925799	-0.00255664	-0.00255663	0.911917	0.0148063	0.0140754	5.47898	0.0946974	0.907094	0.0468304	0.0451345	-0.0975095	0.0518529	0.0494483	0.0519426	0.110811	5.48488	0.041501	0.902863	0.116784
2	YPW1002	REF	1	SINGLE	1	3	3	C	9	C09	1	1	3	3	5	3	15779	14531	6875	6794	0.196283	50	5.48447	0.115044	5.00178	0.126549	0.910798	0.01469	0.0142706	0.895374	0.00281231	0.0028123	0.910758	0.0146603	0.0142675	5.48446	0.115033	0.903419	0.0463528	0.0454539	-0.101569	0.051239	0.0499312	0.0428787	0.112611	5.49036	0.0324371	0.899226	0.118584
37	YPW2842	m75.TATA.22	1	SINGLE	1	3	3	C	10	C10	1	1	3	3	5	3	15779	14032	6278	6083	0.199977	50	5.468	0.107837	3.78497	0.183356	0.692003	0.0292411	0.0294013	0.41637	0.0504083	0.0503657	0.691278	0.0291768	0.0289825	5.46773	0.107728	0.572325	0.0164233	0.0162807	-0.558048	0.0286709	0.0282906	-1.67345	0.224428	5.47363	-1.68389	0.571572	0.230401
27	YPW2814	m76.m90.TATA.26	1	SINGLE	1	3	3	C	11	C11	1	1	3	3	5	3	11651	9546	4075	3905	0.0768566	50	5.48118	0.114673	3.06521	0.289682	0.558062	0.0538734	0.0593956	0.601504	-0.00792573	-0.00792557	0.558095	0.0535808	0.0593913	5.4814	0.114602	0.525385	0.0105902	0.0116694	-0.643625	0.0201728	0.0218966	-2.71495	0.455791	5.4873	-2.72539	0.525119	0.461764
CTRL	YPW1002	REF	1	SINGLE	1	3	3	C	12	C12	1	1	3	3	5	3	13794	12702	5604	5531	0.33194	50	5.46661	0.104684	4.97425	0.127708	0.908557	0.0169274	0.0164098	0.913449	-0.000894822	-0.000894822	0.908605	0.016903	0.0164096	5.46664	0.104713	0.89668	0.0521944	0.0509448	-0.109056	0.0584004	0.0565601	0.0260443	0.128357	5.47253	0.0156027	0.892558	0.13433
34	YPW2834	m75.m90.TATA.22	1	SINGLE	1	3	3	D	1	D01	1	1	3	3	5	4	14128	12202	5060	4809	0.061076	50	5.4715	0.107741	3.20112	0.258243	0.583918	0.0462902	0.0490662	0.624486	-0.00741438	-0.00741424	0.584003	0.0463005	0.0490618	5.47165	0.107739	0.531135	0.0114424	0.0112708	-0.63274	0.0215895	0.0211178	-2.51234	0.359489	5.48308	-2.55117	0.52994	0.37564
CTRL	YPW1002	REF	1	SINGLE	1	3	3	D	2	D02	1	1	3	3	5	4	7180	6663	2755	2709	0.0967838	50	5.47459	0.109549	5.01108	0.122464	0.914697	0.0141309	0.0138827	0.919596	-0.000894822	-0.000894822	0.914684	0.0141399	0.0138823	5.47461	0.109523	0.916004	0.0461545	0.0452723	-0.087735	0.0502495	0.0492209	0.0735816	0.10877	5.48604	0.03475	0.900151	0.124921
5	YPW2458	m76.m63	1	SINGLE	1	3	3	D	3	D03	1	1	3	3	5	4	5102	4035	1576	1509	-0.334195	50	5.48452	0.124842	3.02119	0.320021	0.549368	0.0575055	0.0619227	0.519922	0.00536898	0.00536893	0.549201	0.0574931	0.0619203	5.48436	0.124393	0.523664	0.0107353	0.0113543	-0.646904	0.0206205	0.0214303	-2.7845	0.47543	5.49579	-2.82333	0.522755	0.491582
45	YPW3011	TATA.81_TATA.81	1	DOUBLE	1	3	3	D	4	D04	1	1	3	3	5	4	19754	17929	7682	7562	0.279723	50	5.48321	0.0973461	5.38351	0.217337	0.980597	0.0366322	0.0363159	1.04999	-0.012656	-0.0126553	0.980735	0.0366554	0.0363005	5.48316	0.0973545	1.19744	0.197195	0.202065	0.18019	0.165508	0.163083	0.5901	0.289631	5.49459	0.551268	1.17087	0.305783
26	YPW2812	m75.m63.TATA.26	1	SINGLE	1	3	3	D	5	D05	1	1	3	3	5	4	13983	9946	4425	4173	-0.160546	50	5.49416	0.1255	2.92737	0.312136	0.532097	0.0556321	0.0613788	0.666971	-0.0245486	-0.0245437	0.532323	0.0559197	0.0613281	5.49427	0.125567	0.520711	0.00929934	0.00930688	-0.652559	0.0178362	0.0177501	-2.91649	0.444683	5.50569	-2.95532	0.519914	0.460835
CTRL	YPW1002	REF	1	SINGLE	1	3	3	D	6	D06	1	1	3	3	5	4	12003	11006	4574	4486	0.239445	50	5.46836	0.102685	4.99585	0.112419	0.912996	0.0144345	0.0137059	0.962628	-0.0090763	-0.00907605	0.913191	0.0142919	0.0136798	5.46834	0.102726	0.911171	0.0459981	0.0442059	-0.0930252	0.0503991	0.0482657	0.0619019	0.107455	5.47977	0.0230703	0.895502	0.123607
48	YPW3015	TATA.129_TATA.129	1	DOUBLE	1	3	3	D	7	D07	1	1	3	3	5	4	17820	16106	6973	6836	0.349747	50	5.48855	0.101749	5.22213	0.123305	0.951081	0.0150116	0.0150381	0.938452	0.00230097	0.00230097	0.951073	0.0149522	0.0150366	5.48853	0.101709	1.05302	0.0644108	0.0650698	0.0516584	0.0613274	0.0615347	0.358145	0.117617	5.49996	0.319313	1.03194	0.133769
12	YPW2651	TATA.129	1	SINGLE	1	3	3	D	8	D08	1	1	3	3	5	4	9607	8881	3726	3575	0.229958	50	5.4617	0.0980683	4.67562	0.123047	0.855286	0.0149338	0.0148634	0.787559	0.0124003	0.0123997	0.855129	0.0144772	0.0148194	5.46164	0.0979159	0.761037	0.0296334	0.0305453	-0.273074	0.0389772	0.03987	-0.392141	0.116918	5.47307	-0.430973	0.751086	0.13307
CTRL	YPW1002	REF	1	SINGLE	1	3	3	D	10	D10	1	1	3	3	5	4	11526	10571	4461	4413	0.279886	50	5.46493	0.101511	4.99703	0.119895	0.913622	0.014878	0.0144423	0.942963	-0.00536898	-0.00536893	0.913688	0.0148088	0.0144333	5.46495	0.101447	0.912774	0.0478609	0.046782	-0.0912666	0.0524298	0.05099	0.065793	0.113276	5.47638	0.0269613	0.897045	0.129428
1	YPW1617	WT	1	SINGLE	1	3	3	D	11	D11	1	1	3	3	5	4	12572	11653	5106	5051	0.119837	50	5.47171	0.10602	5.08319	0.117036	0.928475	0.0144856	0.0138405	0.970444	-0.00767005	-0.0076699	0.92856	0.0144697	0.0138196	5.4717	0.106023	0.96371	0.0521635	0.050217	-0.0369652	0.0545041	0.051905	0.182093	0.108243	5.48313	0.143261	0.94604	0.124395
20	YPW1960	m76	1	SINGLE	1	3	3	D	12	D12	1	1	3	3	5	4	13576	12580	5810	5669	0.315616	50	5.47343	0.107626	3.85709	0.22307	0.703796	0.0375951	0.0375997	0.556128	0.026979	0.0269725	0.703593	0.0375428	0.0375168	5.47311	0.107598	0.579659	0.0234426	0.0234481	-0.545316	0.0406629	0.0399774	-1.57716	0.293555	5.48454	-1.61599	0.576616	0.309707
CTRL	YPW1002	REF	1	SINGLE	1	3	3	E	1	E01	2	1	3	3	6	1	11185	10289	4291	4252	0.126589	50	5.47696	0.0981001	5.0067	0.110977	0.913206	0.0139642	0.0133194	0.93281	-0.0035793	-0.00357929	0.913259	0.0138305	0.0133153	5.47703	0.0982871	0.911392	0.0445717	0.0429968	-0.0927825	0.048971	0.0469681	0.0624396	0.10446	5.48128	0.035456	0.900434	0.116529
51	YPW2675	URA3	1	SINGLE	1	3	3	E	2	E02	2	1	3	3	6	1	18961	17143	7719	7642	0.231937	50	5.48274	0.0984406	5.01348	0.118759	0.913669	0.0144583	0.0138633	0.878625	0.00639167	0.00639159	0.913635	0.0144805	0.0138509	5.48284	0.0984208	0.912604	0.0468347	0.0449957	-0.0914535	0.051405	0.0490083	0.0653798	0.108995	5.48709	0.0383963	0.901613	0.121064
31	YPW2826	m75.TATA.26	1	SINGLE	1	3	3	E	3	E03	2	1	3	3	6	1	6818	6323	2614	2379	0.217913	50	5.46251	0.100176	3.64167	0.16136	0.665693	0.0253502	0.0259868	0.428127	0.0434902	0.0434628	0.665104	0.0250281	0.0256914	5.46237	0.100056	0.558898	0.0116498	0.0118154	-0.581788	0.0207769	0.0210562	-1.87813	0.199867	5.46662	-1.90512	0.557324	0.211936
1	YPW1617	WT	1	SINGLE	1	3	3	E	4	E04	2	1	3	3	6	1	9602	8823	3578	3524	0.166565	50	5.46814	0.103458	5.09153	0.113695	0.930622	0.0132683	0.0131339	0.973262	-0.00779789	-0.00779774	0.930696	0.0132405	0.0131118	5.46818	0.103616	0.971524	0.0487326	0.0483764	-0.0288898	0.0500117	0.0496438	0.198795	0.102549	5.47242	0.171812	0.958964	0.114617
CTRL	YPW1002	REF	1	SINGLE	1	3	3	E	5	E05	2	1	3	3	6	1	9251	8591	3594	3551	0.193315	50	5.47375	0.105746	5.02138	0.122691	0.916329	0.0133363	0.013077	0.908632	0.00140615	0.00140615	0.916335	0.0133544	0.0130763	5.47374	0.105757	0.921413	0.0437914	0.0430641	-0.0818472	0.0476929	0.0466272	0.0864939	0.102137	5.47798	0.0595103	0.910188	0.114205
11	YPW2550	TATA.26	1	SINGLE	1	3	3	E	6	E06	2	1	3	3	6	1	10354	9563	4025	3905	0.111389	50	5.46726	0.0996143	3.99743	0.121955	0.730517	0.016577	0.0161649	0.561332	0.0309452	0.0309353	0.73019	0.016502	0.0159255	5.46733	0.0993851	0.598126	0.0126929	0.0122142	-0.513953	0.0212131	0.0203795	-1.36916	0.124199	5.47158	-1.39614	0.595508	0.136267
50	YPW2671	URA3	1	DOUBLE	1	3	3	E	7	E07	2	1	3	3	6	1	16858	15375	6574	6309	0.435544	50	5.49006	0.0979546	5.78353	0.127543	1.05314	0.0164973	0.0181851	1.14859	-0.0173869	-0.0173851	1.0536	0.0161776	0.0181185	5.49024	0.0980877	1.73323	0.157087	0.168101	0.549985	0.0904152	0.0991349	1.15993	0.136286	5.49449	1.13295	1.70039	0.148354
2	YPW1002	REF	1	SINGLE	1	3	3	E	8	E08	2	1	3	3	6	1	10468	9583	3958	3859	0.158631	50	5.47196	0.10213	5.00939	0.112154	0.914789	0.0136387	0.013425	0.958858	-0.00805357	-0.0080534	0.914841	0.0136069	0.0134033	5.47192	0.102066	0.916516	0.0442222	0.0439862	-0.0871762	0.0482896	0.0476929	0.0748111	0.10555	5.47617	0.0478275	0.905421	0.117618
CTRL	YPW1002	REF	1	SINGLE	1	3	3	E	9	E09	2	1	3	3	6	1	11903	11083	4627	4573	0.088707	50	5.46841	0.100033	5.00127	0.113028	0.913393	0.0142263	0.0138596	0.955336	-0.00767005	-0.0076699	0.913519	0.0142874	0.0138413	5.46831	0.0998954	0.91223	0.0458607	0.0448504	-0.0918634	0.0503936	0.0489037	0.0644735	0.108742	5.47255	0.03749	0.901249	0.12081
51	YPW2675	URA3	1	SINGLE	1	3	3	E	10	E10	2	1	3	3	6	1	13687	12495	5727	5674	0.537656	50	5.47735	0.0956109	5.08013	0.115504	0.9267	0.0146184	0.0142412	0.913396	0.00242881	0.0024288	0.926634	0.0146074	0.0142396	5.47735	0.0956445	0.956775	0.0524853	0.0512654	-0.0441866	0.0546819	0.0532086	0.167033	0.11218	5.48159	0.140049	0.944609	0.124248
33	YPW2832	m76.m90.TATA.22	1	SINGLE	1	3	3	E	11	E11	2	1	3	3	6	1	6117	5169	1859	1747	-0.153711	50	5.46442	0.10443	3.07518	0.29242	0.561879	0.0532388	0.0572261	0.850639	-0.0528436	-0.0527945	0.562544	0.0532938	0.057065	5.46448	0.10612	0.526291	0.010869	0.0110299	-0.641901	0.0207005	0.0208187	-2.68015	0.416081	5.46873	-2.70714	0.525585	0.428149
15	YPW2528	TATA.2	1	SINGLE	1	3	3	E	12	E12	2	1	3	3	6	1	11771	10855	4626	4537	0.138525	50	5.46736	0.102385	4.75008	0.1214	0.868958	0.0162715	0.015488	0.845894	0.00421847	0.00421845	0.868945	0.0162503	0.0154828	5.46737	0.10237	0.790845	0.0369822	0.0353794	-0.234653	0.046751	0.0445039	-0.284097	0.121553	5.47162	-0.31108	0.783096	0.133621
10	YPW2478	m63.m89	1	SINGLE	1	3	3	F	1	F01	2	1	3	3	6	2	14546	13568	6225	6065	0.324784	50	5.47401	0.107522	3.97396	0.253785	0.724677	0.0434636	0.0440077	0.475393	0.0455395	0.0455081	0.724437	0.0435354	0.0438185	5.47366	0.107767	0.5938	0.031774	0.0327699	-0.521212	0.0537506	0.0539425	-1.41415	0.348548	5.48	-1.44506	0.590939	0.361075
2	YPW1002	REF	1	SINGLE	1	3	3	F	2	F02	2	1	3	3	6	2	10057	9281	4112	4055	0.162699	50	5.46953	0.105989	5.0084	0.122286	0.915265	0.0144955	0.0142625	0.924354	-0.00166181	-0.00166181	0.915296	0.0144952	0.0142615	5.46952	0.10602	0.918	0.047089	0.0468151	-0.0855582	0.0513832	0.050734	0.0783659	0.11194	5.47587	0.0474548	0.90527	0.124466
CTRL	YPW1002	REF	1	SINGLE	1	3	3	F	3	F03	2	1	3	3	6	2	8582	7955	3307	3262	0.241161	50	5.47238	0.104139	5.00939	0.118657	0.915211	0.0136845	0.0132302	0.936197	-0.00383497	-0.00383495	0.915187	0.0136613	0.0132248	5.47235	0.104	0.917644	0.044614	0.0434406	-0.0859456	0.0487079	0.0470898	0.0775155	0.103959	5.47869	0.0466044	0.904925	0.116486
36	YPW2840	m63.m89.TATA.22	1	SINGLE	1	3	3	F	4	F04	2	1	3	3	6	2	13030	11908	5118	4936	0.160768	50	5.47776	0.109634	3.43385	0.273402	0.626392	0.0476405	0.0485705	0.409207	0.0396486	0.0396278	0.625972	0.0477684	0.0484383	5.47713	0.110187	0.543314	0.0161017	0.0160475	-0.610068	0.0296214	0.0292506	-2.18415	0.368638	5.48347	-2.21506	0.541989	0.381165
2	YPW1002	REF	1	SINGLE	1	3	3	F	5	F05	2	1	3	3	6	2	8911	8357	3559	3443	0.0887931	50	5.46717	0.0985506	5.01531	0.113595	0.916095	0.0144497	0.0139467	0.947545	-0.00575249	-0.00575243	0.916092	0.0144731	0.0139368	5.46715	0.0985572	0.920612	0.0470416	0.0460713	-0.0827168	0.0517861	0.0497802	0.0845925	0.109477	5.4735	0.0536814	0.907803	0.122004
52	YPW2676	URA3	2	SINGLE	1	3	3	F	6	F06	2	1	3	3	6	2	15823	14408	6119	6025	0.163272	50	5.49116	0.106425	5.02379	0.119415	0.914056	0.0137695	0.0133083	0.902825	0.00204531	0.00204531	0.914023	0.0137878	0.0133068	5.4911	0.106366	0.913859	0.0446807	0.0434007	-0.0900795	0.0490152	0.0471929	0.0684148	0.104813	5.49745	0.0375037	0.901255	0.11734
CTRL	YPW1002	REF	1	SINGLE	1	3	3	F	7	F07	2	1	3	3	6	2	13263	12198	5173	5109	0.352786	50	5.47198	0.0977472	5.00557	0.112513	0.913654	0.0139165	0.0134524	0.91785	-0.000766991	-0.00076699	0.913641	0.0139486	0.0134522	5.472	0.0977483	0.912622	0.0447796	0.0437166	-0.0914332	0.0491341	0.0476119	0.0654247	0.105892	5.47834	0.0345135	0.900056	0.118419
30	YPW2824	m63.m89.TATA.26	1	SINGLE	1	3	3	F	8	F08	2	1	3	3	6	2	10980	9597	4165	3993	0.176329	50	5.47581	0.110211	3.2235	0.288393	0.586992	0.0504991	0.0537831	0.360068	0.0414412	0.0414175	0.586708	0.0507729	0.053655	5.475	0.110516	0.531805	0.012809	0.0128702	-0.631479	0.0239693	0.0239952	-2.49119	0.401909	5.48134	-2.5221	0.53083	0.414436
50	YPW2671	URA3	1	DOUBLE	1	3	3	F	9	F09	2	1	3	3	6	2	19304	17525	7852	7533	0.413099	50	5.4866	0.098912	5.79345	0.126019	1.05584	0.0163431	0.0171637	1.18422	-0.0233975	-0.0233932	1.0561	0.0162284	0.0170322	5.48658	0.0989856	1.75754	0.159891	0.163537	0.563917	0.0909379	0.0942167	1.17945	0.130022	5.49292	1.14854	1.71926	0.142549
1	YPW1617	WT	1	SINGLE	1	3	3	F	10	F10	2	1	3	3	6	2	7480	6870	2932	2880	0.13223	50	5.46942	0.109646	5.09605	0.120991	0.931002	0.013684	0.0133445	0.945685	-0.00268447	-0.00268447	0.931134	0.0136329	0.0133415	5.46943	0.109729	0.97314	0.0506923	0.0495133	-0.0272272	0.0519127	0.0506611	0.202216	0.1046	5.47578	0.171305	0.958732	0.117127
CTRL	YPW1002	REF	1	SINGLE	1	3	3	F	11	F11	2	1	3	3	6	2	11063	10279	4575	4512	0.154538	50	5.48102	0.110993	5.01736	0.123265	0.914896	0.0143649	0.0140284	0.912794	0.000383495	0.000383495	0.914879	0.0143893	0.0140283	5.48102	0.110994	0.916637	0.0467974	0.0459788	-0.0870441	0.0512344	0.0498718	0.0751015	0.110299	5.48736	0.0441904	0.903948	0.122826
46	YPW3012	m75_TATA.81	1	DOUBLE	1	3	3	F	12	F12	2	1	3	3	6	2	19097	17356	7850	7652	0.282581	50	5.48946	0.102338	5.24467	0.133484	0.955079	0.0174851	0.017713	0.967008	-0.00217314	-0.00217314	0.955067	0.0175479	0.0177119	5.48947	0.10236	1.07057	0.0782653	0.0786467	0.0681886	0.0731702	0.0732443	0.389377	0.137787	5.49582	0.358466	1.05319	0.150314
17	YPW2566	TATA.42	1	SINGLE	1	3	3	G	1	G01	2	1	3	3	6	3	18921	17430	7755	7629	0.264562	50	5.47049	0.100581	4.20561	0.127606	0.767516	0.0169944	0.0164882	0.59893	0.0308172	0.0308074	0.767262	0.0166866	0.0162402	5.47047	0.100553	0.631199	0.0172004	0.0168655	-0.460135	0.0272946	0.0265818	-1.07926	0.128336	5.47464	-1.10771	0.627513	0.138532
7	YPW2460	m76.m90	1	SINGLE	1	3	3	G	2	G02	2	1	3	3	6	3	18223	16324	7651	7437	0.270409	50	5.48088	0.108313	3.42878	0.295187	0.625018	0.0520192	0.0532898	0.54514	0.0145738	0.0145728	0.625133	0.0518615	0.0532747	5.48064	0.108452	0.543029	0.0173424	0.0181851	-0.610592	0.0320356	0.0329407	-2.19071	0.420495	5.48481	-2.21916	0.541816	0.430691
3	YPW978	NEGATIVE	1	NONE	1	3	3	G	3	G03	2	1	3	3	6	3	15522	10823	4785	4624	0.125693	50	5.49782	0.117802	2.88621	0.331228	0.523983	0.0590493	0.0651807	0.857516	-0.0606665	-0.0605922	0.524864	0.0598163	0.0649654	5.49916	0.117689	0.519526	0.00926423	0.00947715	-0.654839	0.0178975	0.0180547	-2.97481	0.480014	5.50332	-3.00326	0.518972	0.49021
CTRL	YPW1002	REF	1	SINGLE	1	3	3	G	4	G04	2	1	3	3	6	3	14249	13014	6165	6069	0.176903	50	5.48024	0.112004	4.99867	0.127783	0.911712	0.0150764	0.01455	0.901204	0.00191748	0.00191748	0.911644	0.0150636	0.0145487	5.48026	0.112031	0.906224	0.0478238	0.0465768	-0.0984687	0.0529063	0.051048	0.0498052	0.114596	5.48443	0.0213547	0.894824	0.124792
22	YPW1896	m63	1	SINGLE	1	3	3	G	5	G05	2	1	3	3	6	3	9001	8406	3547	3500	0.145939	50	5.46033	0.0989265	4.77568	0.129387	0.873879	0.0178045	0.0175851	0.857825	0.00294014	0.00294013	0.873895	0.0177889	0.0175831	5.46032	0.0989299	0.802333	0.0420573	0.0417272	-0.220232	0.0524718	0.0516785	-0.245388	0.137918	5.46448	-0.273839	0.793846	0.148114
29	YPW2816	m76.TATA.26	1	SINGLE	1	3	3	G	6	G06	2	1	3	3	6	3	12451	11339	5058	4800	0.18158	50	5.47577	0.109802	3.34518	0.224696	0.609961	0.0386185	0.0409116	0.456626	0.0280025	0.0279951	0.609545	0.0388356	0.040828	5.4755	0.109606	0.538066	0.0116133	0.011488	-0.619774	0.0215861	0.0212895	-2.31261	0.300076	5.47967	-2.34106	0.536992	0.310272
CTRL	YPW1002	REF	1	SINGLE	1	3	3	G	8	G08	2	1	3	3	6	3	10080	9461	4101	4048	0.255989	50	5.48123	0.110503	5.02198	0.118015	0.915453	0.0137832	0.0134132	0.923861	-0.00153398	-0.00153398	0.915483	0.0137413	0.0134124	5.48126	0.110542	0.918612	0.0451299	0.0441272	-0.0848917	0.0489657	0.0477934	0.0798284	0.105358	5.48543	0.0513779	0.906864	0.115554
6	YPW2465	m75.m63	1	SINGLE	1	3	3	G	9	G09	2	1	3	3	6	3	8374	6579	2704	2612	-0.175184	50	5.48748	0.121651	3.07188	0.335261	0.557554	0.0613253	0.0663659	0.47337	0.015341	0.0153398	0.557597	0.0618415	0.0663509	5.487	0.121317	0.525285	0.0124348	0.0133305	-0.643814	0.0236286	0.0249981	-2.71884	0.522705	5.49117	-2.74729	0.52457	0.532901
41	YPW3022	m63.m89_m63.m89	1	DOUBLE	1	3	3	G	10	G10	2	1	3	3	6	3	17426	15590	6623	6484	0.3053	50	5.48221	0.0937603	4.92963	0.152439	0.898505	0.0231667	0.0236437	0.875379	0.00421847	0.00421845	0.898441	0.0232177	0.023641	5.48225	0.0937605	0.866355	0.066429	0.0674449	-0.14346	0.0768939	0.0772517	-0.0534381	0.183988	5.48641	-0.0818886	0.856073	0.194184
29	YPW2816	m76.TATA.26	1	SINGLE	1	3	3	G	11	G11	2	1	3	3	6	3	8660	7782	3432	3264	0.200894	50	5.46621	0.10868	3.32035	0.237937	0.607395	0.0417089	0.0445229	0.496977	0.0202002	0.0201974	0.606709	0.0416367	0.0444861	5.46635	0.108539	0.537226	0.0123398	0.0123284	-0.621336	0.0229504	0.0228318	-2.33478	0.329247	5.47051	-2.36323	0.536176	0.339443
CTRL	YPW1002	REF	1	SINGLE	1	3	3	G	12	G12	2	1	3	3	6	3	9580	8862	3877	3805	0.143741	50	5.4695	0.109826	5.01293	0.119999	0.91627	0.0137855	0.0136568	0.931652	-0.00281231	-0.0028123	0.916287	0.0137547	0.0136539	5.46951	0.109804	0.921253	0.0451312	0.0450078	-0.0820208	0.0491117	0.048696	0.0861144	0.106787	5.47368	0.0576639	0.909431	0.116983
44	YPW3028	m75_m75	1	DOUBLE	1	3	3	H	1	H01	2	1	3	3	6	4	20666	18545	8670	8476	0.592808	50	5.49259	0.094795	5.13549	0.134132	0.934629	0.0184715	0.0185401	0.912161	0.00409064	0.00409061	0.934594	0.0184778	0.0185369	5.49261	0.0947617	0.986123	0.0703368	0.0706409	-0.0139739	0.071137	0.0711233	0.229275	0.14525	5.50203	0.190243	0.967506	0.157945
CTRL	YPW1002	REF	1	SINGLE	1	3	3	H	2	H02	2	1	3	3	6	4	13100	12010	5551	5472	0.465558	50	5.48284	0.112514	5.00242	0.12988	0.912173	0.0145164	0.014266	0.891147	0.00383497	0.00383495	0.912101	0.0145436	0.0142605	5.4828	0.112467	0.907681	0.0460409	0.0458757	-0.0968627	0.0509934	0.0501736	0.0533826	0.112468	5.49221	0.0143512	0.892067	0.125164
2	YPW1002	REF	1	SINGLE	1	3	3	H	3	H03	2	1	3	3	6	4	14041	12980	6424	6353	0.279206	50	5.48773	0.114721	5.01236	0.134108	0.912187	0.0151472	0.0147865	0.863782	0.00882062	0.00882039	0.912052	0.0149993	0.0147565	5.48772	0.114792	0.907524	0.0477439	0.0475316	-0.097035	0.0526786	0.0519465	0.0529991	0.116573	5.49713	0.0139677	0.891916	0.129268
38	YPW3006	m63.m90_m63.m90	1	DOUBLE	1	3	3	H	4	H04	2	1	3	3	6	4	17993	15980	7233	6812	0.378169	50	5.4889	0.0956244	5.26698	0.165933	0.959226	0.0250999	0.0267321	1.02869	-0.012656	-0.0126553	0.959346	0.0250728	0.0267107	5.48876	0.0957061	1.08999	0.116474	0.120897	0.0861666	0.106667	0.110579	0.422836	0.204838	5.49818	0.383804	1.0674	0.217534
14	YPW2546	TATA.22	1	SINGLE	1	3	3	H	5	H05	2	1	3	3	6	4	7160	6694	3209	3064	0.134561	49	5.44911	0.121133	4.53782	0.135467	0.831368	0.0171721	0.0170141	0.804898	0.00485764	0.00485761	0.83124	0.0171791	0.0170052	5.44908	0.121105	0.71652	0.0290035	0.0294367	-0.33335	0.0405642	0.0406469	-0.578949	0.135817	5.45849	-0.617981	0.708223	0.148513
CTRL	YPW1002	REF	1	SINGLE	1	3	3	H	6	H06	2	1	3	3	6	4	9657	8927	4174	4121	0.197451	50	5.47085	0.110055	5.00648	0.129113	0.91411	0.0148066	0.0145374	0.868652	0.00830925	0.00830906	0.913908	0.0148057	0.0145118	5.47097	0.109863	0.913484	0.048003	0.0473125	-0.0904894	0.0527252	0.0514265	0.0675097	0.114364	5.48038	0.0284783	0.897648	0.12706
18	YPW2605	TATA.81	1	SINGLE	1	3	3	H	7	H07	2	1	3	3	6	4	10274	9440	4401	4294	0.141785	50	5.47411	0.113132	4.38859	0.132875	0.801291	0.0163385	0.016298	0.683012	0.0216069	0.0216036	0.801092	0.0163197	0.0161439	5.47432	0.113485	0.670998	0.0218091	0.0217577	-0.398989	0.0326029	0.0322628	-0.814712	0.127078	5.48373	-0.853744	0.664444	0.139774
47	YPW3034	m66_m66	1	DOUBLE	1	3	3	H	8	H08	2	1	3	3	6	4	20679	18841	8393	8209	0.335122	50	5.48183	0.0948102	5.33355	0.124176	0.972585	0.0158037	0.016081	0.997812	-0.00460198	-0.00460194	0.97263	0.015827	0.016076	5.48184	0.0948051	1.1546	0.0808528	0.0824838	0.143754	0.0701858	0.0710307	0.526722	0.125964	5.49125	0.48769	1.12953	0.13866
35	YPW2836	m76.TATA.22	1	SINGLE	1	3	3	H	9	H09	2	1	3	3	6	4	13351	12137	5409	5065	0.0896361	50	5.47582	0.107806	3.38721	0.234942	0.618155	0.0405426	0.0431452	0.511744	0.0194329	0.0194304	0.617984	0.0403805	0.0431089	5.47552	0.10769	0.540678	0.0129166	0.0131217	-0.614932	0.0239045	0.0241405	-2.24661	0.320858	5.48493	-2.28565	0.539112	0.333554
CTRL	YPW1002	REF	1	SINGLE	1	3	3	H	10	H10	2	1	3	3	6	4	12192	11224	5235	5131	0.365222	50	5.46708	0.109416	4.98977	0.125368	0.91143	0.0152291	0.0147976	0.889066	0.00409064	0.00409061	0.911355	0.0152344	0.0147919	5.46714	0.109428	0.905308	0.0484708	0.0472932	-0.0994801	0.0533363	0.0518619	0.0475487	0.116622	5.47656	0.00851731	0.889785	0.129318
2	YPW1002	REF	1	SINGLE	1	3	3	H	11	H11	2	1	3	3	6	4	8757	8156	3570	3533	0.0887386	50	5.47283	0.108305	5.00094	0.120154	0.913649	0.0142864	0.0138873	0.901056	0.00230097	0.00230097	0.913622	0.0143007	0.0138855	5.47278	0.108421	0.912561	0.0456851	0.0447484	-0.0915	0.0502475	0.048915	0.0652769	0.108408	5.48219	0.0262455	0.89676	0.121103
9	YPW2475	m63.m90	1	SINGLE	1	3	3	H	12	H12	2	1	3	3	6	4	12080	11056	5046	4917	0.153419	50	5.47837	0.110749	3.72329	0.288253	0.678872	0.0499474	0.050148	0.528969	0.0273628	0.027356	0.678389	0.0494937	0.0500858	5.47824	0.110927	0.56537	0.0253601	0.0264836	-0.570275	0.0448948	0.0458245	-1.77425	0.403788	5.48765	-1.81328	0.562859	0.416484
CTRL	YPW1002	REF	1	SINGLE	1	4	4	A	1	A01	1	1	4	4	7	1	22389	20608	9672	9574	0.205014	50	5.48212	0.102349	4.97212	0.128003	0.906103	0.015751	0.0154021	0.852841	0.00971552	0.00971521	0.90598	0.0158497	0.0153741	5.48207	0.102369	0.888615	0.0480795	0.0470548	-0.118091	0.054023	0.0525943	0.00551393	0.121015	5.48717	0.0108089	0.890679	0.124155
21	YPW1897	m66	1	SINGLE	1	4	4	A	2	A02	1	1	4	4	7	1	18215	16655	8343	8184	0.143152	50	5.48502	0.116983	4.63603	0.166855	0.844745	0.0225434	0.0226855	0.688345	0.0285142	0.0285065	0.844162	0.022647	0.0224812	5.48513	0.116882	0.739564	0.0422627	0.0424109	-0.301694	0.0572202	0.0567804	-0.477905	0.176873	5.49022	-0.47261	0.740837	0.180013
13	YPW2656	TATA.135	1	SINGLE	1	4	4	A	3	A03	1	1	4	4	7	1	16704	15027	6974	6852	0.266807	50	5.47353	0.105078	4.22055	0.13827	0.77035	0.0177573	0.0174018	0.556837	0.0390084	0.0389887	0.769956	0.0174301	0.0169876	5.47362	0.105001	0.633998	0.018226	0.0179885	-0.45571	0.0287984	0.028226	-1.05819	0.134027	5.47871	-1.05289	0.63471	0.137167
1	YPW1617	WT	1	SINGLE	1	4	4	A	4	A04	1	1	4	4	7	1	18131	16528	7617	7461	0.326197	50	5.47674	0.108004	5.06073	0.128576	0.923258	0.0151884	0.0149289	0.905755	0.0031958	0.00319579	0.923191	0.0151739	0.0149256	5.47677	0.107924	0.944633	0.0526445	0.0523244	-0.0569593	0.0557497	0.0549784	0.140102	0.117622	5.48186	0.145397	0.946994	0.120762
CTRL	YPW1002	REF	1	SINGLE	1	4	4	A	5	A05	1	1	4	4	7	1	16586	15190	6584	6495	0.307502	50	5.47088	0.106138	4.98124	0.122919	0.909294	0.0152234	0.0147354	0.921882	-0.00230097	-0.00230097	0.909379	0.0152105	0.0147337	5.47088	0.10615	0.899088	0.0475116	0.0463614	-0.106374	0.0525659	0.0512034	0.0320928	0.116105	5.47597	0.0373878	0.901208	0.119245
32	YPW2828	m75.m63.TATA.22	1	SINGLE	1	4	4	A	7	A07	1	1	4	4	7	1	12538	8947	3997	3871	-0.0643103	50	5.48711	0.118021	2.9489	0.328189	0.536327	0.058861	0.0636993	0.74475	-0.0379843	-0.037966	0.536729	0.059371	0.0636077	5.48749	0.118227	0.521445	0.00994168	0.0101847	-0.651151	0.0190787	0.0193593	-2.88203	0.470145	5.49258	-2.87674	0.52156	0.473285
24	YPW1901	m90	1	SINGLE	1	4	4	A	8	A08	1	1	4	4	7	1	17663	16155	7331	7228	0.281079	50	5.46876	0.105915	4.80038	0.12983	0.877001	0.0163923	0.0160086	0.821771	0.0100991	0.0100987	0.876769	0.0163742	0.0159784	5.46881	0.105907	0.809209	0.0397392	0.0390019	-0.211698	0.0490958	0.0478391	-0.222913	0.126045	5.47391	-0.217618	0.810852	0.129185
CTRL	YPW1002	REF	1	SINGLE	1	4	4	A	9	A09	1	1	4	4	7	1	16092	14737	6587	6497	0.216555	50	5.46901	0.101876	4.97656	0.122816	0.908995	0.0154418	0.0150941	0.883127	0.00472981	0.00472977	0.908939	0.0156031	0.0150876	5.469	0.101869	0.897717	0.047941	0.047198	-0.1079	0.0536326	0.0522505	0.028653	0.118607	5.4741	0.033948	0.89983	0.121747
19	YPW1898	m75	1	SINGLE	1	4	4	A	10	A10	1	1	4	4	7	1	16042	14634	6559	6411	0.0637655	50	5.47206	0.10639	4.32236	0.165048	0.789067	0.0252411	0.0249097	0.686228	0.0187935	0.0187913	0.788612	0.0252537	0.0248436	5.47215	0.106075	0.655078	0.0304733	0.0306528	-0.423001	0.0467174	0.0462445	-0.912302	0.197383	5.47725	-0.907007	0.655903	0.200523
42	YPW3025	TATA.42_TATA.42	1	DOUBLE	1	4	4	A	11	A11	1	1	4	4	7	1	19057	17389	7587	7455	0.16717	50	5.47826	0.097849	4.52908	0.122663	0.826157	0.0156811	0.0155245	0.754023	0.0131674	0.0131667	0.825995	0.0157689	0.0154777	5.47815	0.0977698	0.70781	0.0254282	0.0252756	-0.34558	0.0359558	0.0355448	-0.619966	0.121501	5.48325	-0.614671	0.708914	0.124641
4	YPW2455	m76.m66	1	SINGLE	1	4	4	A	12	A12	1	1	4	4	7	1	19399	13939	6402	6168	0.128332	50	5.48386	0.113165	2.92942	0.344553	0.533463	0.0629765	0.0673231	0.807084	-0.0498957	-0.0498544	0.533623	0.0626098	0.0672024	5.48483	0.113255	0.520925	0.0103308	0.0107539	-0.652149	0.0198609	0.0204068	-2.90632	0.508622	5.48993	-2.90103	0.521038	0.511762
40	YPW3021	m63.m90_TATA.26	1	DOUBLE	1	4	4	B	1	B01	1	1	4	4	7	2	20731	18373	7931	7807	0.158977	50	5.47585	0.0946669	4.60202	0.135839	0.839909	0.0203199	0.0195024	0.769206	0.0129117	0.012911	0.839861	0.0200823	0.0194709	5.47585	0.0946286	0.731634	0.0364553	0.0356392	-0.312475	0.049779	0.0482937	-0.511536	0.153715	5.48411	-0.508436	0.732354	0.156817
11	YPW2550	TATA.26	1	SINGLE	1	4	4	B	2	B02	1	1	4	4	7	2	12721	11831	5252	5061	0.109934	50	5.46386	0.103601	3.97058	0.12937	0.726071	0.0170063	0.0171497	0.534616	0.0350402	0.0350259	0.725604	0.0166783	0.0168101	5.46384	0.103618	0.594662	0.0123833	0.01256	-0.519763	0.0207661	0.0210397	-1.40503	0.132379	5.4721	-1.40193	0.594956	0.135481
CTRL	YPW1002	REF	1	SINGLE	1	4	4	B	3	B03	1	1	4	4	7	2	18712	17144	7801	7659	0.243559	50	5.47611	0.102848	4.98051	0.129836	0.908648	0.0150743	0.0148188	0.854045	0.00997121	0.00997088	0.908445	0.0151686	0.0147877	5.47615	0.102902	0.896182	0.0468366	0.0462278	-0.109611	0.0523809	0.0512005	0.0247885	0.116619	5.4844	0.0278882	0.897413	0.119721
49	YPW3040	m66_TATA.129	1	DOUBLE	1	4	4	B	4	B04	1	1	4	4	7	2	18239	16246	7521	7422	0.387166	50	5.49035	0.100208	5.03352	0.129283	0.916115	0.0170406	0.0164563	0.876109	0.00728654	0.00728641	0.916111	0.0170186	0.016443	5.49043	0.100222	0.920672	0.0558139	0.0545439	-0.0826511	0.0607574	0.0587697	0.0847361	0.129592	5.49868	0.0878359	0.921979	0.132694
43	YPW3010	m63.m89_TATA.42	1	DOUBLE	1	4	4	B	5	B05	1	1	4	4	7	2	17065	15080	7248	7079	0.570497	51	5.48689	0.0963332	5.23939	0.131868	0.955231	0.0196242	0.0200701	1.09344	-0.0251882	-0.0251829	0.95534	0.0195046	0.0199445	5.48683	0.0966975	1.07179	0.0873791	0.0881948	0.0693282	0.0816439	0.0821909	0.391513	0.154185	5.49508	0.394613	1.07356	0.157288
16	YPW2653	m75.TATA.42	1	SINGLE	1	4	4	B	6	B06	1	1	4	4	7	2	16521	15086	6479	6292	0.0840379	50	5.47284	0.104415	3.75546	0.166462	0.685315	0.0259345	0.0262453	0.401723	0.0518182	0.0517719	0.684637	0.0255066	0.0257728	5.47269	0.104802	0.568654	0.0137459	0.0137007	-0.564483	0.0241766	0.0240093	-1.72539	0.19893	5.48094	-1.72229	0.568868	0.202032
CTRL	YPW1002	REF	1	SINGLE	1	4	4	B	7	B07	1	1	4	4	7	2	13186	12236	5162	5089	0.13531	50	5.46718	0.100514	4.98841	0.113584	0.911134	0.0142899	0.0140093	0.955863	-0.00818141	-0.00818123	0.911334	0.0143325	0.0139884	5.46712	0.100316	0.90524	0.0451	0.044694	-0.0995547	0.0500962	0.049038	0.0473823	0.110231	5.47538	0.0504821	0.906499	0.113333
8	YPW2469	m75.m90	1	SINGLE	1	4	4	B	8	B08	1	1	4	4	7	2	14675	13319	5690	5504	0.0862253	50	5.4765	0.10657	3.58782	0.252983	0.654449	0.0440277	0.0456266	0.555728	0.0180262	0.0180243	0.654424	0.0438185	0.0455977	5.47655	0.106449	0.554161	0.0186572	0.0195954	-0.5903	0.0336697	0.0348298	-1.96166	0.360348	5.48481	-1.95856	0.55433	0.363451
52	YPW2676	URA3	2	SINGLE	1	4	4	B	9	B09	1	1	4	4	7	2	19108	17142	7623	7542	0.103366	50	5.49307	0.102004	5.00341	0.128892	0.910562	0.0155511	0.0150547	0.867728	0.00779789	0.00779774	0.91048	0.0155014	0.0150372	5.49312	0.102139	0.902541	0.0489523	0.0476444	-0.102541	0.0541765	0.0524527	0.0407031	0.118295	5.50137	0.0438029	0.903792	0.121397
3	YPW978	NEGATIVE	1	NONE	1	4	4	B	10	B10	1	1	4	4	7	2	9316	6432	2702	2523	-0.122716	50	5.48302	0.115842	2.89873	0.357068	0.527332	0.0643206	0.0683048	0.850823	-0.0589987	-0.0589304	0.52864	0.0645455	0.0681229	5.48343	0.1162	0.520117	0.0102848	0.01034	-0.653701	0.0197194	0.0196489	-2.94529	0.50848	5.49169	-2.94219	0.52018	0.511582
CTRL	YPW1002	REF	1	SINGLE	1	4	4	B	11	B11	1	1	4	4	7	2	15262	14100	6645	6557	0.327318	50	5.471	0.111199	4.98968	0.124997	0.911324	0.0150422	0.0147314	0.921115	-0.00178965	-0.00178964	0.91138	0.0150281	0.0147303	5.47103	0.11119	0.905387	0.047458	0.0468669	-0.0993929	0.052539	0.0515018	0.0477435	0.115548	5.47928	0.0508433	0.906646	0.11865
25	YPW1903	m91	1	SINGLE	1	4	4	B	12	B12	1	1	4	4	7	2	13386	12380	5892	5837	0.150105	50	5.47185	0.106567	4.88753	0.135005	0.892725	0.0171822	0.0167217	0.834666	0.0106104	0.01061	0.892599	0.0171026	0.0166894	5.47195	0.106572	0.849984	0.0471655	0.045918	-0.162538	0.055182	0.0536722	-0.099126	0.131119	5.48021	-0.0960262	0.851071	0.134221
23	YPW1892	m89	1	SINGLE	1	4	4	C	1	C01	1	1	4	4	7	3	13516	12507	5566	5496	0.0768206	50	5.466	0.110409	4.87035	0.130476	0.889906	0.015741	0.0151482	0.842391	0.00869278	0.00869256	0.889768	0.0157617	0.0151226	5.46592	0.110364	0.842316	0.0420368	0.0409833	-0.1716	0.0499669	0.0482464	-0.121264	0.119647	5.47191	-0.114168	0.844756	0.122735
2	YPW1002	REF	1	SINGLE	1	4	4	C	2	C02	1	1	4	4	7	3	14887	13658	6223	6149	0.326069	50	5.4717	0.107491	4.98437	0.124696	0.910438	0.0149156	0.0143428	0.897149	0.00242881	0.0024288	0.910387	0.0149212	0.0143409	5.47173	0.107505	0.902248	0.0466796	0.0453415	-0.102866	0.0518417	0.0499843	0.0399748	0.112659	5.47771	0.0470714	0.905114	0.115747
50	YPW2671	URA3	1	DOUBLE	1	4	4	C	3	C03	1	1	4	4	7	3	18175	16003	7168	6901	0.159759	50	5.48874	0.0998316	5.7742	0.135123	1.05103	0.0179526	0.0184735	1.17033	-0.0217348	-0.0217314	1.05124	0.0179339	0.0183647	5.48859	0.0998401	1.71068	0.171533	0.169973	0.53689	0.0993585	0.100452	1.14148	0.14037	5.49457	1.14858	1.7193	0.143457
CTRL	YPW1002	REF	1	SINGLE	1	4	4	C	4	C04	1	1	4	4	7	3	16218	14592	6321	6206	0.354701	50	5.4725	0.106069	4.984	0.127296	0.910048	0.0160934	0.0154707	0.920542	-0.00191748	-0.00191748	0.910058	0.0161149	0.0154695	5.4725	0.106059	0.901216	0.0501637	0.0489812	-0.10401	0.055898	0.0539306	0.0374074	0.122016	5.47848	0.044504	0.904075	0.125103
39	YPW3019	TATA.26_TATA.26	1	DOUBLE	1	4	4	C	6	C06	1	1	4	4	7	3	18693	16660	7716	7620	0.352412	50	5.4887	0.10074	4.45229	0.134523	0.810463	0.0180206	0.017401	0.660277	0.0273628	0.027356	0.810064	0.0178143	0.0172189	5.48873	0.10069	0.683442	0.0256406	0.0246895	-0.380613	0.037491	0.0359997	-0.74455	0.13443	5.49471	-0.737454	0.68475	0.137518
28	YPW2820	m75.m90.TATA.26	1	SINGLE	1	4	4	C	7	C07	1	1	4	4	7	3	17922	15268	7172	6755	0.195018	50	5.48127	0.112008	3.15442	0.265374	0.574511	0.0469434	0.0512888	0.53247	0.00767005	0.0076699	0.5743	0.047032	0.0512842	5.48125	0.111845	0.528844	0.0106393	0.010817	-0.637062	0.0201548	0.0203365	-2.58822	0.37221	5.48723	-2.58112	0.529051	0.375297
CTRL	YPW1002	REF	1	SINGLE	1	4	4	C	8	C08	1	1	4	4	7	3	17472	16040	7353	7211	0.368747	50	5.47837	0.105585	4.98267	0.124498	0.908652	0.0150722	0.0145932	0.873636	0.00639167	0.00639159	0.908519	0.0150319	0.0145802	5.47838	0.10556	0.896412	0.0465031	0.0455038	-0.109355	0.0519606	0.0504441	0.025368	0.114726	5.48437	0.0324646	0.899237	0.117813
2	YPW1002	REF	1	SINGLE	1	4	4	C	9	C09	1	1	4	4	7	3	16089	14778	6796	6721	0.267148	50	5.46694	0.103853	4.97373	0.123447	0.908885	0.0157659	0.0155331	0.90609	0.000511327	0.000511327	0.908879	0.0157599	0.015533	5.46694	0.103851	0.89753	0.0492484	0.048586	-0.108109	0.0546678	0.0537766	0.0281822	0.122153	5.47292	0.0352788	0.900363	0.12524
37	YPW2842	m75.TATA.22	1	SINGLE	1	4	4	C	10	C10	1	1	4	4	7	3	19064	17329	8321	8086	0.227098	50	5.4811	0.11303	3.77801	0.194969	0.688699	0.029663	0.0298266	0.327338	0.0659286	0.0658333	0.687964	0.028523	0.0290631	5.48151	0.113458	0.570469	0.0157375	0.0160979	-0.561296	0.0276335	0.0280257	-1.69937	0.227735	5.48749	-1.69228	0.570973	0.230822
27	YPW2814	m76.m90.TATA.26	1	SINGLE	1	4	4	C	11	C11	1	1	4	4	7	3	19780	16206	7547	7299	-0.0210702	50	5.48537	0.1166	3.05192	0.305763	0.555934	0.0536927	0.0574751	0.565751	-0.00178965	-0.00178964	0.555922	0.0537348	0.0574748	5.48536	0.116712	0.524953	0.0107083	0.0107609	-0.644446	0.0203387	0.0203144	-2.73194	0.42751	5.49135	-2.72484	0.525133	0.430597
CTRL	YPW1002	REF	1	SINGLE	1	4	4	C	12	C12	1	1	4	4	7	3	18156	16570	8119	7999	0.397991	50	5.47586	0.106716	4.97199	0.12775	0.907832	0.0163363	0.01599	0.886832	0.00383497	0.00383495	0.907786	0.01626	0.0159855	5.47583	0.106692	0.894147	0.0502489	0.0490111	-0.111885	0.056206	0.0547192	0.0196407	0.124279	5.48181	0.0267373	0.896956	0.127366
34	YPW2834	m75.m90.TATA.22	1	SINGLE	1	4	4	D	1	D01	1	1	4	4	7	4	19169	16656	7693	7375	0.140168	50	5.47551	0.105378	3.18127	0.268942	0.58003	0.047816	0.0523417	0.515632	0.0117611	0.0117605	0.579715	0.0479047	0.052332	5.47528	0.105528	0.530101	0.0114472	0.0114668	-0.634688	0.0216089	0.0215157	-2.54588	0.37821	5.4868	-2.56717	0.529462	0.391477
CTRL	YPW1002	REF	1	SINGLE	1	4	4	D	2	D02	1	1	4	4	7	4	6751	6228	2734	2649	0.012668	50	5.47679	0.11557	5.01348	0.132468	0.915191	0.0139921	0.0139593	0.873183	0.00767005	0.0076699	0.915186	0.0139702	0.0139347	5.47677	0.1157	0.91764	0.0456909	0.0454939	-0.0859506	0.0499456	0.0494251	0.0775046	0.108874	5.48828	0.0562111	0.908836	0.12214
5	YPW2458	m76.m63	1	SINGLE	1	4	4	D	3	D03	1	1	4	4	7	4	13342	10191	4647	4509	0.0963725	50	5.48721	0.122768	3.0013	0.341664	0.545069	0.0617248	0.0683667	0.722595	-0.0323527	-0.0323414	0.545759	0.061857	0.0683046	5.48754	0.123608	0.52303	0.0112052	0.0128145	-0.648116	0.0213922	0.024028	-2.81142	0.55121	5.49905	-2.83271	0.52254	0.564476
45	YPW3011	TATA.81_TATA.81	1	DOUBLE	1	4	4	D	4	D04	1	1	4	4	7	4	17319	15501	6729	6589	0.247285	50	5.47986	0.0971994	5.34646	0.226753	0.97462	0.0387393	0.0380072	1.05378	-0.014446	-0.014445	0.975133	0.0387738	0.0379882	5.48013	0.0977064	1.16754	0.200992	0.202432	0.154902	0.172799	0.167303	0.546296	0.303149	5.49164	0.525002	1.15348	0.316416
26	YPW2812	m75.m63.TATA.26	1	SINGLE	1	4	4	D	5	D05	1	1	4	4	7	4	15593	10797	4594	4398	-0.107991	50	5.47585	0.113028	2.93702	0.325202	0.535396	0.0596967	0.0643066	0.964664	-0.078393	-0.078233	0.536364	0.0593425	0.0639522	5.47687	0.113289	0.521384	0.0101308	0.0101319	-0.651269	0.019491	0.0192709	-2.88488	0.46904	5.48838	-2.90617	0.520928	0.482306
CTRL	YPW1002	REF	1	SINGLE	1	4	4	D	6	D06	1	1	4	4	7	4	10079	9259	3796	3700	0.0989279	50	5.46323	0.095807	5.00194	0.112258	0.914598	0.0136083	0.0134218	0.947422	-0.00600816	-0.00600809	0.914626	0.0135074	0.0134111	5.46323	0.0957996	0.915814	0.0437027	0.0439161	-0.087942	0.047732	0.047662	0.073126	0.105559	5.47474	0.0518325	0.907049	0.118826
48	YPW3015	TATA.129_TATA.129	1	DOUBLE	1	4	4	D	7	D07	1	1	4	4	7	4	18520	16696	7275	7153	0.243272	50	5.48607	0.099567	5.23609	0.125886	0.953477	0.0157562	0.0155773	0.961191	-0.00140615	-0.00140615	0.953531	0.0157328	0.0155768	5.48608	0.0995492	1.06375	0.0697229	0.0688123	0.0618038	0.0651615	0.0643592	0.377368	0.122014	5.49759	0.356075	1.05187	0.13528
12	YPW2651	TATA.129	1	SINGLE	1	4	4	D	8	D08	1	1	4	4	7	4	15535	14528	6402	6234	0.173118	50	5.47152	0.101445	4.66639	0.122261	0.851761	0.0154794	0.0150273	0.777617	0.013551	0.0135502	0.851521	0.0154524	0.0149737	5.47153	0.101325	0.753769	0.0303689	0.0301485	-0.282669	0.0404681	0.0396769	-0.420354	0.118701	5.48305	-0.441647	0.748418	0.131967
CTRL	YPW1002	REF	1	SINGLE	1	4	4	D	10	D10	1	1	4	4	7	4	15116	13708	6016	5949	0.254152	50	5.46984	0.106658	4.99003	0.122752	0.91172	0.0146348	0.0144498	0.931298	-0.0035793	-0.00357929	0.911723	0.0147035	0.0144454	5.46993	0.106701	0.906478	0.0468105	0.0461415	-0.0981888	0.0515311	0.0506202	0.0504293	0.113455	5.48144	0.0291358	0.897909	0.126721
1	YPW1617	WT	1	SINGLE	1	4	4	D	11	D11	1	1	4	4	7	4	12913	11798	5261	5200	0.290396	50	5.47435	0.107029	5.08175	0.124343	0.92827	0.0154475	0.014822	0.952763	-0.00447414	-0.00447411	0.928301	0.0154724	0.0148152	5.4744	0.107142	0.96277	0.0558875	0.053538	-0.0379406	0.0579671	0.05546	0.180065	0.115636	5.48592	0.158772	0.953016	0.128902
20	YPW1960	m76	1	SINGLE	1	4	4	D	12	D12	1	1	4	4	7	4	15664	14374	6560	6368	0.243208	50	5.46878	0.107012	3.85567	0.21586	0.704486	0.0369162	0.0368121	0.596813	0.0196886	0.0196861	0.704382	0.0368808	0.0367682	5.46856	0.10717	0.580153	0.0231647	0.0231185	-0.544463	0.0400629	0.0394123	-1.57098	0.287647	5.48007	-1.59228	0.57846	0.300913
CTRL	YPW1002	REF	1	SINGLE	1	4	4	E	1	E01	2	1	4	4	8	1	17532	16328	7304	7215	0.179793	50	5.48108	0.105276	5.00928	0.117027	0.9132	0.0134549	0.0132395	0.905493	0.00140615	0.00140615	0.913167	0.0134598	0.0132388	5.48107	0.105294	0.911096	0.0430754	0.0427826	-0.0931071	0.0473875	0.0467169	0.0617206	0.104014	5.48404	0.0346252	0.900101	0.117156
51	YPW2675	URA3	1	SINGLE	1	4	4	E	2	E02	2	1	4	4	8	1	14118	13100	5786	5725	0.338122	50	5.48604	0.106835	5.01223	0.120597	0.913088	0.0135205	0.0130707	0.871711	0.00754221	0.00754207	0.912999	0.0135266	0.0130495	5.48599	0.106884	0.910553	0.0433843	0.0421018	-0.0937027	0.0477704	0.0460143	0.0604007	0.102494	5.48896	0.0333053	0.899573	0.115636
31	YPW2826	m75.TATA.26	1	SINGLE	1	4	4	E	3	E03	2	1	4	4	8	1	15870	14623	6290	6088	0.129506	50	5.47355	0.106258	3.63769	0.159903	0.663894	0.0252816	0.02623	0.464393	0.0364482	0.036432	0.663363	0.0250767	0.025997	5.47341	0.106385	0.558098	0.011464	0.0116121	-0.58322	0.0204947	0.0207582	-1.89175	0.199123	5.47638	-1.91885	0.55654	0.212264
1	YPW1617	WT	1	SINGLE	1	4	4	E	4	E04	2	1	4	4	8	1	14067	13065	6143	6007	0.270629	50	5.47586	0.108517	5.07867	0.122087	0.926137	0.0137977	0.0137787	0.949937	-0.00434631	-0.00434628	0.926184	0.0137679	0.0137719	5.47583	0.10845	0.955167	0.0489962	0.0494996	-0.0458686	0.0512532	0.0514223	0.163508	0.108698	5.4788	0.136413	0.942994	0.121839
CTRL	YPW1002	REF	1	SINGLE	1	4	4	E	5	E05	2	1	4	4	8	1	12969	11943	5252	5179	0.156809	50	5.47576	0.105397	5.00364	0.121314	0.913674	0.0140711	0.0136355	0.898275	0.00281231	0.0028123	0.913652	0.0140218	0.0136326	5.47578	0.105418	0.912658	0.0447407	0.0444623	-0.0913942	0.0492056	0.0483397	0.0655109	0.107689	5.47875	0.0384154	0.901621	0.120831
11	YPW2550	TATA.26	1	SINGLE	1	4	4	E	6	E06	2	1	4	4	8	1	14005	12732	5379	5225	0.163092	49	5.4704	0.0981098	3.98055	0.124681	0.727271	0.0166568	0.0165134	0.545389	0.0332485	0.0332363	0.727088	0.0162503	0.0162322	5.47029	0.0982532	0.595769	0.0122153	0.0121912	-0.517902	0.0205029	0.0204103	-1.39342	0.127009	5.47326	-1.42052	0.593203	0.14015
50	YPW2671	URA3	1	DOUBLE	1	4	4	E	7	E07	2	1	4	4	8	1	19996	18074	8070	7762	0.274523	50	5.48998	0.0985795	5.786	0.129356	1.0528	0.0167952	0.0176139	1.17282	-0.0218627	-0.0218592	1.05319	0.0165701	0.0175023	5.48985	0.0986259	1.72927	0.159536	0.164213	0.547701	0.0920633	0.0961482	1.15672	0.133562	5.49282	1.12962	1.69641	0.146703
2	YPW1002	REF	1	SINGLE	1	4	4	E	8	E08	2	1	4	4	8	1	12807	11871	4995	4786	0.0927082	50	5.47038	0.0992933	4.99761	0.116817	0.912404	0.0137054	0.0136377	0.940376	-0.00511331	-0.00511327	0.912399	0.0136211	0.0136293	5.47043	0.0993538	0.908632	0.0437633	0.0441525	-0.0958148	0.0481215	0.0481496	0.0557129	0.107992	5.4734	0.0286174	0.897703	0.121133
CTRL	YPW1002	REF	1	SINGLE	1	4	4	E	9	E09	2	1	4	4	8	1	13873	12747	5794	5711	0.180548	50	5.48411	0.107307	5.00754	0.122275	0.911868	0.0138052	0.0135963	0.92028	-0.00153398	-0.00153398	0.911881	0.013893	0.0135955	5.4841	0.107311	0.90698	0.0442305	0.0436577	-0.0976346	0.0488728	0.0478044	0.051664	0.107215	5.48707	0.0245686	0.896095	0.120356
51	YPW2675	URA3	1	SINGLE	1	4	4	E	10	E10	2	1	4	4	8	1	12032	10999	4706	4656	0.262531	50	5.48125	0.100862	5.00452	0.118146	0.911927	0.0146779	0.0142703	0.89441	0.0031958	0.00319579	0.911874	0.0146748	0.0142671	5.48132	0.100867	0.906955	0.0467976	0.0458208	-0.0976619	0.0516342	0.0501571	0.0516032	0.112534	5.48429	0.0245078	0.896071	0.125675
33	YPW2832	m76.m90.TATA.22	1	SINGLE	1	4	4	E	11	E11	2	1	4	4	8	1	17517	14091	6667	6393	0.328456	50	5.48476	0.10963	3.07335	0.305545	0.559239	0.0541742	0.0587064	0.587986	-0.00524115	-0.0052411	0.559269	0.0542328	0.0587048	5.48472	0.10952	0.525621	0.0111186	0.0109835	-0.643175	0.0211336	0.0207575	-2.70577	0.425083	5.48769	-2.73286	0.52493	0.438224
15	YPW2528	TATA.2	1	SINGLE	1	4	4	E	12	E12	2	1	4	4	8	1	17474	15926	7521	7380	0.255182	50	5.47013	0.112483	4.74003	0.133897	0.865402	0.0165302	0.0159883	0.78708	0.0143181	0.0143172	0.86527	0.0164609	0.0159187	5.4701	0.112416	0.782599	0.0364064	0.0353384	-0.245135	0.0465802	0.0449145	-0.312837	0.124952	5.47307	-0.339932	0.775039	0.138093
10	YPW2478	m63.m89	1	SINGLE	1	4	4	F	1	F01	2	1	4	4	8	2	18625	16828	7334	7176	0.363188	50	5.4756	0.106367	3.96303	0.251277	0.723043	0.0425397	0.0438713	0.432288	0.0531	0.0530502	0.722271	0.0431048	0.0436122	5.47581	0.10648	0.592221	0.0306721	0.0321052	-0.523876	0.0519595	0.0530354	-1.43109	0.347315	5.48088	-1.46212	0.589397	0.360914
2	YPW1002	REF	1	SINGLE	1	4	4	F	2	F02	2	1	4	4	8	2	14039	12895	6133	6021	0.309054	50	5.47792	0.109197	5.00454	0.122617	0.913433	0.0145877	0.013994	0.912033	0.000255663	0.000255663	0.913425	0.0145977	0.013994	5.47792	0.109183	0.911926	0.0468762	0.0453482	-0.0921968	0.0515082	0.0494447	0.063736	0.11003	5.48298	0.0327129	0.899336	0.12363
CTRL	YPW1002	REF	1	SINGLE	1	4	4	F	3	F03	2	1	4	4	8	2	12126	11187	4801	4729	0.112858	50	5.48319	0.106183	5.01781	0.123622	0.91453	0.0142108	0.0139027	0.867567	0.00856493	0.00856473	0.914497	0.0142003	0.0138774	5.48317	0.106183	0.915394	0.0460297	0.0455257	-0.0884004	0.050312	0.0493597	0.0721166	0.109539	5.48824	0.0410936	0.902699	0.123139
36	YPW2840	m63.m89.TATA.22	1	SINGLE	1	4	4	F	4	F04	2	1	4	4	8	2	17112	15360	6842	6608	0.319102	50	5.47416	0.103417	3.43393	0.268459	0.626793	0.0470532	0.049449	0.344536	0.0515618	0.0515162	0.626562	0.0468693	0.049253	5.47391	0.103403	0.543515	0.0159529	0.0162768	-0.609698	0.0293057	0.0296585	-2.17954	0.372188	5.47897	-2.21056	0.542179	0.385788
2	YPW1002	REF	1	SINGLE	1	4	4	F	5	F05	2	1	4	4	8	2	15005	13837	6220	6084	0.328643	50	5.47243	0.108303	5.00304	0.121659	0.913598	0.014102	0.0136815	0.892611	0.00383497	0.00383495	0.91354	0.0140152	0.0136759	5.47239	0.108221	0.912295	0.0452854	0.0442775	-0.0917922	0.0495126	0.048301	0.0646309	0.107336	5.47746	0.0336079	0.899694	0.120936
52	YPW2676	URA3	2	SINGLE	1	4	4	F	6	F06	2	1	4	4	8	2	18481	16167	7171	7104	0.334813	50	5.46764	0.111344	4.97295	0.145603	0.908402	0.0158056	0.0154212	0.739205	0.0309452	0.0309353	0.908027	0.015509	0.015081	5.46755	0.111257	0.89489	0.047679	0.0470671	-0.111054	0.0533486	0.0521628	0.0215236	0.119125	5.47262	-0.00949939	0.882821	0.132724
CTRL	YPW1002	REF	1	SINGLE	1	4	4	F	7	F07	2	1	4	4	8	2	15243	14107	6473	6385	0.153955	50	5.47662	0.108598	5.01081	0.118777	0.913867	0.013382	0.0131329	0.93207	-0.00332364	-0.00332363	0.913942	0.0133341	0.0131285	5.47665	0.108588	0.913594	0.043275	0.0429945	-0.0903687	0.0472897	0.0466682	0.0677764	0.103899	5.48172	0.0367534	0.900954	0.117498
30	YPW2824	m63.m89.TATA.26	1	SINGLE	1	4	4	F	8	F08	2	1	4	4	8	2	12954	11286	5050	4745	0.231109	50	5.47521	0.113404	3.22583	0.283148	0.589194	0.0496232	0.0535345	0.392436	0.0359362	0.0359207	0.588333	0.0494723	0.0534306	5.47494	0.113788	0.532214	0.0127257	0.0127097	-0.630709	0.0238119	0.0237147	-2.47848	0.391886	5.48	-2.50951	0.531224	0.405486
50	YPW2671	URA3	1	DOUBLE	1	4	4	F	9	F09	2	1	4	4	8	2	18895	17338	7269	6986	0.340056	50	5.47653	0.0920119	5.77167	0.122017	1.0529	0.016537	0.0173453	1.19294	-0.0255719	-0.0255663	1.05321	0.0162834	0.0172091	5.47658	0.0921743	1.72948	0.156595	0.16242	0.54782	0.090266	0.0946989	1.15689	0.132081	5.48165	1.12586	1.69192	0.145681
1	YPW1617	WT	1	SINGLE	1	4	4	F	10	F10	2	1	4	4	8	2	12311	11317	4938	4834	0.142478	50	5.46688	0.107613	5.0817	0.119155	0.928483	0.0135404	0.0134883	0.967618	-0.0071587	-0.00715858	0.928604	0.013667	0.0134688	5.46688	0.107625	0.96387	0.0496249	0.0491099	-0.0367991	0.0512309	0.0506757	0.182438	0.10582	5.47195	0.151415	0.949693	0.11942
CTRL	YPW1002	REF	1	SINGLE	1	4	4	F	11	F11	2	1	4	4	8	2	8035	7451	3138	3095	0.0807863	50	5.46464	0.105143	5.00775	0.118041	0.915618	0.0134344	0.0134188	0.927494	-0.00217314	-0.00217314	0.915636	0.0134944	0.0134172	5.46461	0.105251	0.919114	0.0439099	0.0441227	-0.0843455	0.0478979	0.0477957	0.0810259	0.105221	5.46968	0.0500029	0.906304	0.118821
46	YPW3012	m75_TATA.81	1	DOUBLE	1	4	4	F	12	F12	2	1	4	4	8	2	16855	15070	7032	6872	0.533246	50	5.48969	0.0991087	5.2259	0.132851	0.951112	0.0181217	0.0183175	0.965147	-0.00255664	-0.00255663	0.951119	0.0181242	0.018316	5.48971	0.0991488	1.05321	0.0777896	0.0794227	0.0518445	0.0742502	0.074862	0.358499	0.14351	5.49477	0.327476	1.03631	0.15711
17	YPW2566	TATA.42	1	SINGLE	1	4	4	G	1	G01	2	1	4	4	8	3	17969	16474	7858	7704	0.221182	50	5.47806	0.115768	4.21584	0.134635	0.769032	0.017193	0.01638	0.608624	0.0292818	0.0292735	0.76845	0.0167091	0.016078	5.47805	0.115702	0.632426	0.0172924	0.0168333	-0.458193	0.0273182	0.0264857	-1.06997	0.126906	5.48093	-1.09853	0.628691	0.138175
7	YPW2460	m76.m90	1	SINGLE	1	4	4	G	2	G02	2	1	4	4	8	3	11124	10131	4606	4475	0.241711	50	5.47315	0.108024	3.40688	0.30903	0.6215	0.0543456	0.0568577	0.66138	-0.00728654	-0.00728641	0.621456	0.0543035	0.0568544	5.47324	0.108038	0.541803	0.0176257	0.0207265	-0.612853	0.032628	0.0371048	-2.21947	0.493241	5.47613	-2.24803	0.54062	0.50451
3	YPW978	NEGATIVE	1	NONE	1	4	4	G	3	G03	2	1	4	4	8	3	15723	10606	4384	4257	0.0316301	50	5.48102	0.110448	2.90902	0.352633	0.529195	0.0643	0.0706009	0.98214	-0.0826388	-0.0824515	0.53063	0.0633629	0.0703249	5.48211	0.109939	0.520436	0.0103059	0.011576	-0.653088	0.019758	0.0218369	-2.92972	0.560468	5.485	-2.95828	0.519855	0.571736
CTRL	YPW1002	REF	1	SINGLE	1	4	4	G	4	G04	2	1	4	4	8	3	16095	14743	6744	6653	0.319393	50	5.48103	0.104977	5.00259	0.127578	0.911645	0.0151508	0.0148569	0.833868	0.0141903	0.0141893	0.911443	0.0152021	0.0147946	5.48093	0.104838	0.905588	0.0479951	0.0473224	-0.0991711	0.0533776	0.051877	0.0482384	0.116614	5.48382	0.0196759	0.894161	0.127882
22	YPW1896	m63	1	SINGLE	1	4	4	G	5	G05	2	1	4	4	8	3	17720	16277	7693	7582	0.541552	49	5.46606	0.103147	4.77564	0.135152	0.872868	0.0176824	0.017519	0.786217	0.0158525	0.0158511	0.872577	0.0177376	0.0174553	5.46613	0.103358	0.79923	0.0413307	0.041389	-0.224107	0.051895	0.0512847	-0.255697	0.138218	5.46902	-0.284259	0.790798	0.149487
29	YPW2816	m76.TATA.26	1	SINGLE	1	4	4	G	6	G06	2	1	4	4	8	3	15842	14012	5885	5588	0.0106467	50	5.46719	0.108093	3.3251	0.23175	0.607118	0.039522	0.0426053	0.393151	0.0391365	0.0391165	0.606317	0.0398287	0.0424534	5.46663	0.108629	0.537112	0.011625	0.0117801	-0.621549	0.0217209	0.0218375	-2.33785	0.31557	5.46951	-2.36641	0.536061	0.326839
CTRL	YPW1002	REF	1	SINGLE	1	4	4	G	8	G08	2	1	4	4	8	3	17086	15812	7434	7352	0.217937	50	5.47238	0.107842	5.00381	0.125718	0.913111	0.0146523	0.014202	0.892824	0.00370714	0.00370712	0.913032	0.0146956	0.0141972	5.4724	0.10778	0.910662	0.047079	0.0458522	-0.0935839	0.0518362	0.0500644	0.0606641	0.111595	5.47529	0.0321017	0.899092	0.122864
6	YPW2465	m75.m63	1	SINGLE	1	4	4	G	9	G09	2	1	4	4	8	3	17146	13578	6628	6382	0.0803786	50	5.48362	0.122916	3.06296	0.326685	0.557756	0.0585341	0.0649448	0.626456	-0.0125282	-0.0125275	0.558028	0.0586443	0.0649343	5.48389	0.123164	0.525371	0.0116811	0.0131271	-0.64365	0.0222125	0.0246084	-2.71547	0.512997	5.48678	-2.74404	0.524651	0.524265
41	YPW3022	m63.m89_m63.m89	1	DOUBLE	1	4	4	G	10	G10	2	1	4	4	8	3	17468	15703	7121	6973	0.318032	50	5.48516	0.0984048	4.94091	0.157596	0.900135	0.023493	0.0239072	0.8798	0.00370714	0.00370712	0.900113	0.0234903	0.0239049	5.48519	0.098408	0.871179	0.0679065	0.0693081	-0.137908	0.0777614	0.0788207	-0.0403658	0.186615	5.48808	-0.0689282	0.860721	0.197884
29	YPW2816	m76.TATA.26	1	SINGLE	1	4	4	G	11	G11	2	1	4	4	8	3	17706	15732	7459	7007	0.131819	50	5.47204	0.114683	3.31848	0.237129	0.605957	0.0406951	0.0439973	0.381291	0.041057	0.041034	0.605246	0.0408	0.0438142	5.47181	0.115084	0.5368	0.0119029	0.0118974	-0.622129	0.022178	0.0220784	-2.34622	0.321392	5.4747	-2.37479	0.535758	0.33266
CTRL	YPW1002	REF	1	SINGLE	1	4	4	G	12	G12	2	1	4	4	8	3	16041	14731	6932	6803	0.20193	50	5.4724	0.1104	5.00029	0.122389	0.912976	0.0145472	0.0141982	0.909478	0.000639159	0.000639159	0.91294	0.0145328	0.0141981	5.4724	0.110383	0.910365	0.0467126	0.0460302	-0.0939094	0.0513451	0.0501687	0.0599426	0.112109	5.47529	0.0313802	0.898804	0.123378
44	YPW3028	m75_m75	1	DOUBLE	1	4	4	H	1	H01	2	1	4	4	8	4	22570	20376	9095	8878	0.346826	50	5.49055	0.0984557	5.11364	0.132347	0.9308	0.0175779	0.0176885	0.907638	0.00421847	0.00421845	0.930777	0.0176007	0.0176844	5.49057	0.0984476	0.971822	0.0647097	0.0656	-0.0285825	0.0665939	0.0669579	0.199428	0.138971	5.49871	0.160285	0.953702	0.15274
CTRL	YPW1002	REF	1	SINGLE	1	4	4	H	2	H02	2	1	4	4	8	4	14207	13111	5908	5826	0.106004	50	5.47665	0.110689	5.01632	0.124643	0.915079	0.0132672	0.0132446	0.895476	0.0035793	0.00357929	0.915084	0.0132243	0.0132396	5.47665	0.110729	0.917306	0.0430496	0.0439876	-0.0863144	0.0469472	0.0474284	0.0767054	0.105354	5.48479	0.0375621	0.901278	0.119122
2	YPW1002	REF	1	SINGLE	1	4	4	H	3	H03	2	1	4	4	8	4	17365	15988	7580	7507	0.374764	50	5.47332	0.10109	4.99431	0.123961	0.911697	0.0148762	0.0145192	0.875314	0.00664735	0.00664725	0.911639	0.0148315	0.0145058	5.47331	0.100996	0.906209	0.0469336	0.0463602	-0.0984858	0.0519289	0.0508516	0.0497672	0.114068	5.48144	0.0106239	0.890607	0.127836
38	YPW3006	m63.m90_m63.m90	1	DOUBLE	1	4	4	H	4	H04	2	1	4	4	8	4	16729	15129	7550	7122	0.822612	50	5.46898	0.086635	5.31623	0.151457	0.97147	0.0230661	0.0245422	1.03859	-0.0122725	-0.0122718	0.971507	0.02296	0.0245236	5.46906	0.0865951	1.14887	0.116908	0.121393	0.138783	0.101735	0.105944	0.517939	0.18702	5.47719	0.478796	1.12396	0.200788
14	YPW2546	TATA.22	1	SINGLE	1	4	4	H	5	H05	2	1	4	4	8	4	3927	3519	1643	1489	-0.0881157	49	5.43944	0.132464	4.53711	0.150492	0.832474	0.018493	0.0179832	0.778932	0.00984336	0.00984304	0.832142	0.0185201	0.0179427	5.43942	0.132096	0.718053	0.0310758	0.0312883	-0.331211	0.0433371	0.0430825	-0.571897	0.143346	5.44755	-0.61104	0.709675	0.157114
CTRL	YPW1002	REF	1	SINGLE	1	4	4	H	6	H06	2	1	4	4	8	4	5956	5522	2261	2215	-0.229243	50	5.47163	0.108349	5.0279	0.129058	0.917518	0.0128565	0.0131463	0.841973	0.0138067	0.0138058	0.917337	0.0126942	0.013071	5.47172	0.108141	0.924729	0.0424241	0.0437458	-0.0782541	0.0457174	0.0470111	0.0943293	0.102944	5.47986	0.055186	0.908417	0.116712
18	YPW2605	TATA.81	1	SINGLE	1	4	4	H	7	H07	2	1	4	4	8	4	11166	10419	4442	4381	0.137071	50	5.46155	0.103314	4.38964	0.12389	0.802521	0.0161871	0.015653	0.683116	0.0218627	0.0218592	0.802227	0.0159074	0.0155147	5.46165	0.103262	0.672525	0.0214647	0.0211749	-0.396716	0.0320361	0.0313022	-0.805831	0.12258	5.46978	-0.844974	0.665894	0.136349
47	YPW3034	m66_m66	1	DOUBLE	1	4	4	H	8	H08	2	1	4	4	8	4	19643	17687	7857	7695	0.0850779	50	5.47924	0.0988699	5.43622	0.125997	0.991765	0.0163404	0.0167578	1.05971	-0.0124003	-0.0123997	0.991908	0.016382	0.01672	5.47915	0.0989261	1.26114	0.0976349	0.099279	0.232017	0.077439	0.078466	0.677469	0.130397	5.48729	0.638325	1.23191	0.144166
35	YPW2836	m76.TATA.22	1	SINGLE	1	4	4	H	9	H09	2	1	4	4	8	4	10132	9262	3758	3585	0.249538	50	5.46196	0.100823	3.38238	0.234551	0.618373	0.0406613	0.0434789	0.459136	0.0291539	0.0291456	0.618224	0.0406151	0.0434092	5.46158	0.100397	0.540754	0.0129612	0.0132851	-0.61479	0.0240445	0.0244317	-2.24474	0.324246	5.46972	-2.28388	0.539182	0.338014
CTRL	YPW1002	REF	1	SINGLE	1	4	4	H	10	H10	2	1	4	4	8	4	10112	9277	4184	4126	0.0446037	50	5.46444	0.10965	5.01295	0.119925	0.916586	0.0140481	0.013722	0.923571	-0.00127832	-0.00127832	0.916637	0.0140217	0.0137214	5.46446	0.109628	0.92241	0.0459465	0.0455102	-0.0807655	0.0500343	0.0490999	0.0888561	0.107684	5.47259	0.0497128	0.906186	0.121452
2	YPW1002	REF	1	SINGLE	1	4	4	H	11	H11	2	1	4	4	8	4	14433	13271	6082	6016	0.241092	50	5.47124	0.111022	5.01221	0.122422	0.914875	0.0140902	0.0136516	0.908581	0.00115049	0.00115049	0.914823	0.0141405	0.0136511	5.47123	0.110995	0.916456	0.045804	0.0447672	-0.087241	0.0500252	0.0485506	0.0746684	0.107439	5.47937	0.0355251	0.900461	0.121208
9	YPW2475	m63.m90	1	SINGLE	1	4	4	H	12	H12	2	1	4	4	8	4	13663	12390	5659	5498	0.250844	50	5.47695	0.108207	3.73239	0.30158	0.679468	0.0521986	0.0534346	0.421631	0.0470768	0.0470421	0.678829	0.0519214	0.0532854	5.47694	0.108375	0.565596	0.0267579	0.0275001	-0.569875	0.047398	0.04762	-1.7708	0.417846	5.48507	-1.80995	0.56307	0.431614
[truncated: 14 more columns]

## Sheet: Dataset 3
ID	STRAIN	MUTATION	YFP.CONSTRUCT	POSITION	COLUMN	ROW	PLATE	DENSITY_1	DENSITY_2	DENSITY_3	DENSITY_4	COUNTS.INITIAL_1	COUNTS.INITIAL_2	COUNTS.INITIAL_3	COUNTS.INITIAL_4	COUNTS.COMPLETE_1	COUNTS.COMPLETE_2	COUNTS.COMPLETE_3	COUNTS.COMPLETE_4	Filtered.events_1	Filtered.events_2	Filtered.events_3	Filtered.events_4	YFP.events_1	YFP.events_2	YFP.events_3	YFP.events_4	GFP.events_1	GFP.events_2	GFP.events_3	GFP.events_4	YGFP.events_1	YGFP.events_2	YGFP.events_3	YGFP.events_4	N.YFP_1	N.YFP_2	N.YFP_3	N.YFP_4	N.GFP_1	N.GFP_2	N.GFP_3	N.GFP_4	N.noFP_1	N.noFP_2	N.noFP_3	N.noFP_4	Freq.YFP.events_1	Freq.YFP.events_2
21	YPW1209	m66	SINGLE	A01	1	A	1	0.228837	0.848152	0.382323	0.855763	55441	58510	63080	75909	55374	58463	62997	75821	55036	57989	62582	75236	25483	25660	27710	32434	27873	30804	33068	40827	1680	1525	1804	1975	27966.2	27880.9	30339.7	35289.2	30431.5	33164.4	35857.4	43909.9	338	474	415	585	0.477603	0.454449
4	YPW2854	m76.m66	SINGLE	A02	2	A	1	0.172722	0.585265	0.278579	0.546732	70443	61635	58597	67492	70305	61527	58522	67420	69856	60760	58100	66951	11007	6176	4115	3155	57821	53959	53825	63698	1028	625	160	98	12259.3	6906.72	4297.12	3263.91	60027.1	55507.7	54274.3	64016.2	449	767	422	469	0.15992	0.102702
2	YPW1189	REF	SINGLE	A03	3	A	1	0.195799	0.773039	0.385696	0.897962	67853	70099	63075	72594	67756	70019	62991	72521	67270	69517	62570	72100	35054	36472	33126	37712	30539	31387	27776	32576	1677	1658	1668	1812	37629.3	39023.6	35704.8	40498.8	32998.6	33814	30207.7	35230	486	502	421	421	0.534417	0.537467
20	YPW1156	m76	SINGLE	A04	4	A	1	0.146388	0.546732	0.228837	0.505095	70500	59262	57503	57873	70386	59222	57430	57826	69982	58968	57039	57310	16996	11027	8878	6754	51660	47085	47390	50041	1326	856	771	515	18702.3	12090.1	9815.85	7363.6	54141.9	48825.4	49051.7	51256.9	404	254	391	516	0.247553	0.189754
11	YPW2879	TATA.26	SINGLE	A05	5	A	1	0.156258	0.564201	0.258652	0.505095	70363	56933	54760	60923	70251	56872	54710	60859	69881	56490	54357	60436	13062	8483	6115	5173	55607	47307	47629	54737	1212	700	613	526	14567.7	9331.21	6837.82	5779.85	58069.4	48833.5	49097.4	56118.5	370	382	353	423	0.190217	0.152052
15	YPW2885	TATA.2	SINGLE	A06	6	A	1	0.152968	0.659907	0.298548	0.674297	66851	63529	55162	68006	66758	63480	55099	67951	66366	63182	54744	67622	32789	30654	25872	31332	31849	31151	27433	34725	1728	1377	1439	1565	35393.7	32714	28009.7	33640.3	34428.5	33222.1	29612.9	37113.8	392	298	355	329	0.507271	0.495979
18	YPW2891	TATA.81	SINGLE	A08	8	A	1	0.176016	0.652733	0.298548	0.602903	68747	67068	54819	71533	68669	66992	54713	71371	68256	66509	54273	70713	21656	19283	14699	17788	45150	45742	38437	51757	1450	1484	1137	1168	23608.1	21248.8	16187.6	19298.4	47646.8	48368.8	40493.3	53921.2	413	483	440	658	0.324163	0.296547
25	YPW1217	m91	SINGLE	A09	9	A	1	0.182608	0.73613	0.368849	0.754533	67457	63886	57714	77512	67375	63805	57653	77452	66968	63366	57303	76988	32774	31046	28195	38203	32398	30631	27514	36965	1796	1689	1594	1820	35473.2	33585.2	30595.8	40948.1	35086.8	33158.8	29895.3	39680.1	407	439	350	464	0.502885	0.503364
6	YPW2857	m75.m63	SINGLE	A10	10	A	1	0.136522	0.585265	0.258652	0.578231	70635	64776	50301	66748	70556	64701	50228	66700	70161	64269	49807	66286	10807	6670	3408	3576	58268	56906	45962	62572	1086	693	437	138	12126.8	7481.63	3904.5	3730.5	60614.8	58611.1	47201.4	62998.6	395	432	421	414	0.156453	0.104914
26	YPW2925	m75.m63.TATA.26	SINGLE	A11	11	A	1	0.136522	0.578231	0.255335	0.553711	71349	67786	53875	71661	71276	67716	53798	71605	70878	67290	53443	71157	10599	6302	3764	2845	59232	60280	49518	67915	1047	708	161	397	11867.4	7124.46	3947.19	3282.63	61516.5	62082.8	49971	69281.8	398	426	355	448	0.151781	0.0946502
13	YPW2883	TATA.135	SINGLE	A12	12	A	1	0.152968	0.706893	0.28523	0.564201	67840	68240	58514	76090	67736	68180	58466	75990	67350	67827	58158	75404	22181	19477	14716	16334	43587	46868	42265	57729	1582	1482	1177	1341	24327.3	21436.7	16240.3	18031.7	46277.8	49499.5	44439.3	60330.5	386	353	308	586	0.337261	0.293571
8	YPW2863	m75.m90	SINGLE	B01	1	B	1	0.182608	0.627735	0.298548	0.667095	72357	59836	57415	72501	72303	59810	57232	72441	71863	59382	56634	71976	13669	8797	5922	5762	56409	49800	50144	65688	1785	785	568	526	15893.3	9740.18	6579.08	6355.48	60007.1	51558	51613	67233	440	428	598	465	0.195054	0.150127
1	YPW1001	WT	SINGLE	B02	2	B	1	0.218916	0.817892	0.416141	0.750844	70220	62107	54747	71889	70131	61980	54687	71747	69766	60944	54396	71161	35139	30673	27540	36624	32568	28796	25385	32805	2059	1475	1471	1732	38267.4	32909.2	29777.1	39271	35618.1	30985.6	27562.1	35356.6	365	1036	291	586	0.518986	0.515781
27	YPW2928	m76.m90.TATA.26	SINGLE	B03	3	B	1	0.152968	0.564201	0.26529	0.588786	71119	55344	52166	70845	71038	55305	52094	70691	70703	55083	51758	70107	10741	5657	3434	3106	58664	48979	47936	66570	1298	447	388	431	12316.7	6179.96	3873.92	3583.55	61478.7	50083.6	49048.8	67998.7	335	222	336	584	0.154758	0.10354
16	YPW2888	m75.TATA.42	SINGLE	B04	4	B	1	0.13981	0.532808	0.225529	0.51893	71644	52092	52815	65216	71541	52044	52704	65097	71192	51814	52306	64597	16517	9431	7266	6531	53104	41771	44393	57488	1571	612	647	578	18526.1	10188.4	8043.88	7206.41	56083.5	43027	45839.6	58923.4	349	230	398	500	0.237242	0.184192
24	YPW1215	m90	SINGLE	B05	5	B	1	0.189202	0.688747	0.335287	0.656318	69885	58667	59549	71145	69779	58630	59484	71032	69433	58355	59155	70489	32654	27497	27771	33700	34611	29553	29940	35296	2168	1305	1444	1493	35874.9	29431.4	29910.4	35922.4	37895	31534.5	32133.7	37553	346	275	329	543	0.485453	0.481981
23	YPW1153	m89	SINGLE	B06	6	B	1	0.172722	0.706893	0.335287	0.76933	69482	61507	53180	75616	69411	61472	53133	75521	69045	61186	52844	75054	35668	31723	27115	38427	31199	28126	24325	34988	2178	1337	1404	1639	39010.4	33770	29260.2	40924.8	34395.5	30092.5	26393.9	37409	366	286	289	467	0.533417	0.530051
9	YPW2865	m63.m90	SINGLE	B07	7	B	1	0.13981	0.592311	0.271932	0.592311	71288	58907	54847	72249	71214	58864	54780	72091	70823	58340	54441	71334	16293	11190	8268	9082	52695	46118	45375	62208	1835	1032	798	44	18638.2	12476.2	9236.32	9134.41	56180	48197.5	47107.7	62309.6	391	524	339	757	0.236172	0.195261
3	YPW1177	TDH3.Deletion	SINGLE	B09	9	B	1	0.146388	0.543246	0.271932	0.525864	70917	58718	52382	69440	70855	58685	52334	69315	70513	58397	52015	68712	8689	4813	3088	2255	60529	53012	48758	65979	1295	572	169	478	10229.3	5471.18	3278.27	2777.18	63533	54533.2	49262.8	67749.8	342	288	319	603	0.125531	0.0832339
22	YPW1188	m63	SINGLE	B10	10	B	1	0.176016	0.685129	0.358763	0.754533	68079	64875	54946	73132	67982	64833	54876	73017	67592	64468	54565	72496	31653	30337	25681	33468	33761	32319	27433	37332	2178	1812	1451	1696	34885.5	33026.8	27834	35966.9	37063.7	35066.1	29633.8	39923.6	390	365	311	521	0.483887	0.484183
5	YPW2855	m76.m63	SINGLE	B11	11	B	1	0.13981	0.574719	0.258652	0.543246	71449	59841	56069	76779	71376	59824	56025	76625	71003	59548	55708	75935	11249	6156	4007	3171	58369	52665	51249	72261	1385	727	452	503	12938	7007.28	4522.19	3726.68	61331.4	54455.2	52509.2	73964.6	373	276	317	690	0.161582	0.104656
2	YPW1189	REF	SINGLE	B12	12	B	1	0.162842	0.73613	0.409361	0.784194	66810	67702	59570	73499	66768	67660	59505	73399	66413	67290	59109	72829	33958	34447	30642	38248	30097	31044	26791	32733	2358	1799	1676	1848	37568.3	37193.5	33214.2	41094.8	33565	33696.9	29250.6	35435.8	355	370	396	570	0.530138	0.525981
34	YPW3001	m75.m90.TATA.22	SINGLE	C01	1	C	1	0.162842	0.564201	0.271932	0.567704	71874	57074	67432	67811	71799	57052	67401	67631	71362	56804	67191	66768	11396	6290	5007	3074	58918	49944	62067	63089	1048	570	117	605	12674.5	6961.14	5140.62	3745.77	61157.5	51317.1	62390	65064.4	437	248	210	863	0.162073	0.111854
29	YPW2934	m76.TATA.26	SINGLE	C02	2	C	1	0.169428	0.560701	0.281904	0.51893	70818	54718	64378	66451	70743	54662	64348	66267	70418	54055	64073	65130	12063	6494	5512	4021	57354	46949	58399	60449	1001	612	162	660	13293.5	7219.81	5698.88	4766.11	59446.3	48383.8	58824.7	62388.5	325	607	275	1137	0.173776	0.121513
15	YPW2885	TATA.2	SINGLE	C03	3	C	1	0.199099	0.743479	0.365485	0.817892	69449	60834	72110	73588	69358	60784	72064	73356	69005	60393	71652	72121	28551	24676	28571	28396	38711	34346	41512	41941	1743	1371	1569	1784	31042.4	26628	30790.8	30914	41468.8	36525.7	44026.6	44809.1	353	391	412	1235	0.424474	0.418081
31	YPW2940	m75.TATA.26	SINGLE	C04	4	C	1	0.146388	0.581746	0.258652	0.532808	70846	54519	63161	67220	70788	54465	63128	67040	70475	54180	62807	65840	13579	7911	6749	5053	55722	45707	55512	60065	1174	562	546	722	15042.8	8589.9	7390.19	5879.71	58085.1	46944.4	56841	62031.6	313	285	321	1200	0.195942	0.147544
33	YPW2943	m76.m90.TATA.22	SINGLE	C06	6	C	1	0.126662	0.553711	0.248704	0.536285	71374	54207	60862	63072	71296	54119	60831	62910	70866	53463	60511	61849	8894	4777	3444	2503	61079	48126	56721	58760	893	560	346	586	9957.38	5425.22	3832.63	3149.47	63142.1	49574.7	57769.1	60765.6	430	656	320	1061	0.127106	0.0902973
2	YPW1189	REF	SINGLE	C07	7	C	1	0.179312	0.791652	0.378952	0.832985	68264	63799	71971	72643	68163	63759	71902	72441	67756	63466	71472	71352	34415	31605	37072	37061	31552	30180	32605	32480	1789	1681	1795	1811	37138.2	34146.1	39824	39839.3	34197.5	32682.3	35241.7	35138.7	407	293	430	1089	0.5217	0.511532
20	YPW1156	m76	SINGLE	C08	8	C	1	0.0544644	0.365485	0.126662	0.305215	72494	52467	48073	56029	72429	52399	48053	55847	72121	52054	47851	54464	18558	10911	7817	7057	52451	40475	39595	46738	1112	668	439	669	20000.7	11752.4	8353.53	7855.98	54497.7	41786.3	40528	48267.8	308	345	202	1383	0.261347	0.212334
13	YPW2883	TATA.135	SINGLE	C09	9	C	1	0.152968	0.613526	0.298548	0.617073	71002	63185	74332	72139	70902	63153	74294	71968	70546	62869	73926	70692	22417	16760	17174	13652	46528	44816	55532	55741	1601	1293	1220	1299	24573.6	18448.4	18733.2	15272.4	49282.3	47166.2	57848.9	58352.4	356	284	368	1276	0.325143	0.272184
19	YPW1200	m75	SINGLE	C10	10	C	1	0.172722	0.667095	0.32525	0.649151	69723	63111	73912	69623	69638	63074	73890	69427	69254	62788	73624	68379	26227	21451	24207	21096	41358	39754	47877	45659	1669	1583	1540	1624	28560.5	23615.4	26294.5	23271.9	44074.9	42414.5	50499.9	48477.6	384	286	266	1048	0.388059	0.350478
35	YPW2947	m76.TATA.22	SINGLE	C11	11	C	1	0.129948	0.602903	0.26197	0.599369	70146	62471	71519	75513	70069	62436	71494	75306	69695	62100	71176	73942	12475	7785	6498	4642	56172	53493	63996	68442	1048	822	682	858	13769.9	8763.79	7288.66	5611.72	58331.9	55392.4	65748.1	70947.3	374	336	318	1364	0.181727	0.127044
17	YPW2889	TATA.42	SINGLE	C12	12	C	1	0.13981	0.620623	0.28523	0.617073	68282	60979	72286	64543	68165	60889	72252	64426	67767	60024	71996	63500	20770	15296	16282	12098	45469	43312	54474	50141	1528	1416	1240	1261	22814.4	17132.7	17861	13668.7	48127.4	45919.4	56848.1	52685.6	398	865	256	926	0.313561	0.260988
2	YPW1189	REF	SINGLE	D01	1	D	1	0.238766	0.936837	0.494747	0.996098	67784	62782	71154	69548	67695	62694	71110	69407	67294	61998	70769	68711	35234	31721	37093	35768	30167	28643	31845	31027	1893	1634	1831	1916	38149.9	34214.8	39912.1	38712.6	32935.8	31053.4	34524.3	33835.3	401	696	341	696	0.538738	0.525495
23	YPW1153	m89	SINGLE	D02	2	D	1	0.212307	0.871041	0.443344	0.81413	68002	61874	73510	73105	67914	61844	73460	72945	67592	61529	73123	71712	33794	30437	36386	35304	32033	29667	35039	34450	1765	1425	1698	1958	36465.4	32583.7	38949.2	38253.1	34657.2	31795.4	37570.1	37375.1	322	315	337	1233	0.513376	0.506406
18	YPW2891	TATA.81	SINGLE	D04	4	D	1	0.152968	0.681515	0.288558	0.564201	69538	57053	64594	71288	69470	57015	64564	71027	69101	56713	64355	69438	22129	17084	17742	17474	45482	38634	45521	50589	1490	995	1092	1375	24138.7	18409.8	19174.9	19253.1	48040.1	40377.1	47487.6	53133.8	369	302	209	1589	0.327299	0.306615
36	YPW2951	m63.m89.TATA.22	SINGLE	D05	5	D	1	0.15955	0.585265	0.281904	0.529335	70765	56017	69383	65036	70676	55987	69351	64846	70323	55699	69026	63337	13551	7791	6904	4754	55622	47312	61551	57919	1150	596	571	664	14984.8	8507.93	7570.62	5513.12	57936.9	48642.4	62974.5	59741.8	353	288	325	1509	0.1959	0.14139
10	YPW2868	m63.m89	SINGLE	D06	6	D	1	0.149677	0.609982	0.26529	0.588786	70221	57447	65349	72292	70106	57385	65325	72083	69787	56789	65074	70626	20536	14437	14521	13627	47749	41215	49592	55754	1502	1137	961	1245	22530.5	15910.5	15742	15179.8	50396.2	43312.5	51441	58258.1	319	596	251	1457	0.30074	0.259416
37	YPW2952	m75.TATA.22	SINGLE	D07	7	D	1	0.136522	0.553711	0.255335	0.536285	68933	60882	68991	67817	68869	60845	68967	67617	68587	60549	68758	66101	15149	10372	9264	7134	52139	49233	58715	58047	1299	944	779	920	16798.1	11532.6	10197.7	8215.26	54642.9	51205.3	60474.6	60279.1	282	296	209	1516	0.225137	0.174012
30	YPW2939	m63.m89.TATA.26	SINGLE	D08	8	D	1	0.146388	0.631296	0.288558	0.602903	70112	58016	70125	72519	70041	57993	70074	72343	69682	57758	69762	70785	12282	7218	6124	4298	56268	49827	63087	65747	1132	713	551	740	13678.4	8066.69	6760.84	5132.6	58611.5	51476.7	64522.2	67934.1	359	235	312	1558	0.179168	0.126532
2	YPW1189	REF	SINGLE	D09	9	D	1	0.189202	0.829205	0.419533	0.878709	68011	57340	68040	75498	67915	57281	68002	75315	67592	56717	67653	73968	32902	27473	33339	36601	32863	27571	32498	35370	1827	1673	1816	1997	35643	29981	36074.7	39613.7	35603	30082	35210.5	38348.6	323	564	349	1347	0.500297	0.49911
14	YPW2884	TATA.22	SINGLE	D10	10	D	1	0.185904	0.732461	0.362123	0.780471	68758	69229	67532	66316	68648	69172	67502	66193	68261	68833	67199	65231	25404	23702	22148	19908	41196	43388	43488	43613	1661	1743	1563	1710	27717.2	26089.1	24268.7	22195.7	43914.6	46310.1	46146.1	46588.5	387	339	303	962	0.381441	0.353287
11	YPW2879	TATA.26	SINGLE	D11	11	D	1	0.143099	0.613526	0.295217	0.627735	69682	66112	71055	72683	69627	66066	71027	72524	69323	65661	70770	71212	15405	11091	9506	7135	52521	53497	60394	63135	1397	1073	870	942	17180.3	12408.3	10548.6	8235.34	55207.7	55748.3	62360.4	65478.1	304	405	257	1312	0.226791	0.171719
32	YPW2941	m75.m63.TATA.22	SINGLE	D12	12	D	1	0.126662	0.645573	0.311888	0.641998	68975	62414	70444	72181	68879	62373	70394	71986	68457	62032	70045	70547	9667	5390	3974	2668	57783	55916	65566	67624	1007	726	505	255	10879.9	6228.7	4541.16	2948.33	60021	57811.2	67096.6	68520.9	422	341	349	1439	0.143321	0.0879196
35	YPW2947	m76.TATA.22	SINGLE	E01	1	E	1	0.152968	0.592311	0.278579	0.532808	72870	55434	65494	64365	72817	55414	65471	64295	72496	55189	65255	63878	13133	7129	5626	3717	58206	47471	59126	59689	1157	589	503	472	14564.8	7832.13	6206.58	4247.89	60580.9	48820	60444.3	61106.7	321	225	216	417	0.184093	0.130568
17	YPW2889	TATA.42	SINGLE	E02	2	E	1	0.1925	0.695994	0.33194	0.546732	71783	55500	66091	64832	71733	55453	66066	64614	71431	54942	65819	63210	23415	15693	16157	13444	46439	38130	48691	48600	1577	1119	971	1166	25551.9	17170.9	17407.7	14916.6	49126.4	40121.1	50504.8	50874.5	302	511	247	1404	0.335199	0.291567
9	YPW2865	m63.m90	SINGLE	E03	3	E	1	0.162842	0.578231	0.298548	0.51893	72487	53482	69195	62687	72423	53452	69167	62497	72058	53186	68903	61115	16640	9948	10008	7042	54103	42540	58109	53282	1315	698	786	791	18319.6	10814.8	10957.1	7976.78	56603.6	43959.7	59842	55160.9	365	266	264	1382	0.235218	0.189529
3	YPW1177	TDH3.Deletion	SINGLE	E04	4	E	1	0.152968	0.602903	0.275255	0.536285	70539	50329	62004	61800	70446	50304	61960	61625	70089	50113	61678	60220	9912	4691	3721	2359	59231	45031	57552	57424	946	391	405	437	11051.5	5145.1	4177.49	2840.29	61333.3	46027.7	58753.4	58939	357	191	282	1405	0.143355	0.0943446
16	YPW2888	m75.TATA.42	SINGLE	E05	5	E	1	0.15955	0.63486	0.278579	0.525864	70060	53970	63617	64980	70007	53956	63591	64788	69722	53763	63351	63318	15233	8868	8264	6247	53237	44141	54532	56296	1252	754	555	775	16819.9	9790.98	8927.03	7151.08	55659.3	45736.1	55799.8	58234.3	285	193	240	1470	0.222477	0.167292
2	YPW1189	REF	SINGLE	E06	6	E	1	0.195799	0.791652	0.395826	0.80662	68326	64013	66482	72116	68235	63992	66453	71953	67904	63716	66214	70715	32930	30199	31943	34495	33208	31936	32627	34371	1766	1581	1644	1849	35575.3	32548.7	34400.3	37270.2	35860.7	34329.9	35101.8	37142.8	331	276	239	1238	0.497898	0.486022
14	YPW2884	TATA.22	SINGLE	E07	7	E	1	0.166134	0.706893	0.32525	0.667095	70175	61592	72830	68745	70069	61569	72779	68547	69609	61343	72467	67213	25871	20965	23542	20318	42157	38933	47396	45386	1581	1445	1529	1509	28071.3	22940.2	25609.8	22331.8	44747.1	41362.6	50009.7	48022.7	460	226	312	1334	0.380299	0.350012
21	YPW1209	m66	SINGLE	E08	8	E	1	0.195799	0.821659	0.392448	0.855763	69711	58611	68900	69986	69613	58595	68875	69823	69191	58399	68599	68613	31174	25173	28945	28108	36184	31609	38025	38692	1833	1617	1629	1813	33857.7	27511.5	31284.6	30693.6	39004.4	34132	40587.6	41568.6	422	196	276	1210	0.462811	0.443327
24	YPW1215	m90	SINGLE	E09	9	E	1	0.2024	0.787921	0.422928	0.890247	69618	57050	66754	68806	69554	56997	66723	68655	69217	56578	66389	67493	34222	27417	31853	33055	33182	27447	32819	32559	1813	1714	1717	1879	36955.6	29987.5	34415.8	35880.6	35887.6	30018.5	35407.4	35370.4	337	419	334	1162	0.507715	0.499727
36	YPW2951	m63.m89.TATA.22	SINGLE	E10	10	E	1	0.152968	0.652733	0.308551	0.620623	71390	57621	68963	70433	71304	57599	68940	70269	70933	57356	68699	68957	14835	8322	7546	6282	54803	48079	60534	62325	1295	955	619	350	16466.9	9475.66	8274.27	6687.56	57342.5	50181.7	62029.6	63226.2	371	243	241	1312	0.21303	0.147551
19	YPW1200	m75	SINGLE	E11	11	E	1	0.176016	0.703257	0.389071	0.765624	68935	57750	68891	69375	68856	57737	68861	69268	68480	57505	68596	68043	26521	20455	23133	21176	40254	35422	43908	45252	1705	1628	1555	1615	28918	22701.6	25252.3	23343.4	43009.3	38121.2	46534.2	48047.4	376	232	265	1225	0.39717	0.366072
25	YPW1217	m91	SINGLE	E12	12	E	1	0.189202	0.859575	0.422928	0.936837	66620	60099	72556	71894	66566	60082	72489	71752	66121	59850	72088	70642	31729	28220	34705	33401	32552	29892	35553	35192	1840	1738	1830	2049	34477.3	30802.3	37439	36448.1	35323.9	32524.4	38309.1	38292.6	445	232	401	1110	0.493598	0.485614
30	YPW2939	m63.m89.TATA.26	SINGLE	F01	1	F	1	0.15955	0.624177	0.26529	0.578231	70588	58748	70440	74244	70505	58738	70421	74149	70050	58486	70181	73348	13046	7751	6575	4585	55779	50021	63020	68103	1225	714	586	660	14567.2	8605.53	7255.64	5330.62	58270.5	51641.9	64513.1	70034.8	455	252	240	801	0.189553	0.134165
28	YPW2930	m75.m90.TATA.26	SINGLE	F02	2	F	1	0.169428	0.645573	0.298548	0.536285	69617	56988	71674	69537	69559	56973	71645	69374	69195	56755	71281	68270	11299	6364	5243	3263	56858	49779	65541	64466	1038	612	497	541	12568.4	7085.41	5810.28	3864.86	59060.2	51246.8	66916.6	66209.3	364	218	364	1104	0.165779	0.113353
6	YPW2857	m75.m63	SINGLE	F03	3	F	1	0.152968	0.638427	0.271932	0.560701	69352	60122	72252	70576	69306	60097	72202	70459	69004	59855	71917	69230	10607	6271	5039	3505	57312	52991	66408	65447	1085	593	470	278	11925.4	6966	5573.73	3815.17	59658	54445.9	67731.1	66325.6	302	242	285	1229	0.156171	0.105818
5	YPW2855	m76.m63	SINGLE	F04	4	F	1	0.143099	0.578231	0.238766	0.515467	64652	57319	68995	71509	64583	57292	68946	71370	64291	56973	68653	70078	9465	6160	4493	3486	53873	50586	63699	66336	953	227	461	256	10617.7	6426.61	5015.22	3771.34	55962.8	51138.3	65027.9	67150.4	292	319	293	1292	0.149436	0.108554
22	YPW1188	m63	SINGLE	F05	5	F	1	0.166134	0.695994	0.318566	0.699623	71460	58851	72005	68923	71369	58792	71978	68788	70990	58413	71721	67573	34403	27856	34649	32217	34756	29090	35478	33632	1831	1467	1594	1724	37144.8	30040.8	37030.6	34784.7	37507.2	31306.6	37878.5	36236.7	379	379	257	1215	0.497448	0.489165
20	YPW1156	m76	SINGLE	F06	6	F	1	0.136522	0.599369	0.271932	0.609982	69972	60103	70949	72038	69876	60066	70906	71888	69517	59721	70650	70759	18516	12555	11589	8940	49555	46135	58142	60744	1446	1031	919	1075	20403.9	13854.9	12713.1	10221.2	52183.8	48154.2	60090.2	63220.1	359	345	256	1129	0.27201	0.213921
34	YPW3001	m75.m90.TATA.22	SINGLE	F07	7	F	1	0.129948	0.522395	0.232146	0.505095	69253	62920	67408	64994	69179	62894	67383	64862	68806	62657	67120	63571	10942	7082	5228	3241	56801	55366	61737	59768	1063	209	155	562	12238.3	7328.37	5405.55	3868.44	59075	55867.2	62158.3	61536.7	373	237	263	1291	0.161522	0.113406
7	YPW2860	m76.m90	SINGLE	F08	8	F	1	0.136522	0.543246	0.252019	0.553711	70742	57263	69243	69148	70683	57228	69185	69009	70366	56955	68932	67785	11671	6521	6087	4850	57635	49753	62372	62641	1060	681	473	294	12969.5	7318.64	6626.74	5179.18	59872.8	51424.6	63682.8	63551.4	317	273	253	1224	0.168398	0.115879
26	YPW2925	m75.m63.TATA.26	SINGLE	F09	9	F	1	0.136522	0.557205	0.26197	0.560701	71173	57545	69158	70507	71094	57514	69101	70317	70726	57125	68826	68933	10861	5614	4305	2890	58771	50856	64077	65471	1094	655	444	572	12190.1	6377.81	4806.54	3522.09	61137.4	52496.7	65377.5	67404.3	368	389	275	1384	0.155977	0.0994156
8	YPW2863	m75.m90	SINGLE	F10	10	F	1	0.143099	0.585265	0.26861	0.606441	70669	62495	69827	69172	70613	62468	69786	69037	70235	62184	69465	67699	13209	8900	7802	5641	55816	52558	60989	61349	1210	726	674	709	14713.3	9769.06	8587.22	6443.83	58269.7	54204.2	62683.9	63391.9	378	284	321	1338	0.191365	0.144814
2	YPW1189	REF	SINGLE	F11	11	F	1	0.172722	0.743479	0.385696	0.83677	68617	68829	68883	68558	68570	68789	68817	68414	68206	68444	68465	67344	35178	35505	36056	35221	31129	31069	30723	30290	1899	1870	1686	1833	38086.4	38374.5	38655.2	38042.3	33921.2	33813.6	33187.2	32972.9	364	345	352	1070	0.530532	0.533316
33	YPW2943	m76.m90.TATA.22	SINGLE	F12	12	F	1	0.143099	0.638427	0.271932	0.602903	67691	61744	71391	73880	67614	61717	71354	73709	67221	61422	71088	72555	9660	5739	4496	2863	56520	55054	66423	69197	1041	629	169	495	10916.2	6469.54	4686.98	3408.34	58820	56657.1	66916.8	70908.8	393	295	266	1154	0.145966	0.0944023
23	YPW1153	m89	SINGLE	G01	1	G	1	0.278579	0.984153	0.536285	1.00009	67928	64865	72764	68822	67852	64838	72734	68722	67414	64498	72394	67908	32200	30609	34768	32009	33290	32178	35713	34022	1924	1711	1913	1877	35070.1	33154.4	37624.8	34796.3	36192.1	34766.2	38595.4	36866.6	438	340	340	814	0.491678	0.487505
2	YPW1189	REF	SINGLE	G02	2	G	1	0.26197	0.948597	0.539764	0.894102	69395	58073	71724	71680	69314	58044	71661	71551	68898	57788	71253	70498	34528	28886	36448	35357	32485	27493	33097	33222	1885	1409	1708	1919	37384.7	31017.1	39052.2	38265.9	35284.2	29589.3	35618.8	36071.1	416	256	408	1053	0.515243	0.512354
15	YPW2885	TATA.2	SINGLE	G03	3	G	1	0.245391	0.88255	0.491303	0.867215	68342	60281	72257	69406	68311	60255	72191	69295	67972	59928	71855	68296	32281	27567	31775	29811	33820	30882	38317	36743	1871	1479	1763	1742	35066	29744.7	34340.7	32337.5	36648.5	33143.7	41048	39452	339	327	336	999	0.488359	0.471642
25	YPW1217	m91	SINGLE	G04	4	G	1	0.222222	0.859575	0.480986	0.874873	68687	65486	71872	70494	68653	65456	71827	70361	68306	65092	71526	69260	33874	32939	36843	35682	32626	30595	33020	31699	1806	1558	1663	1879	36600.1	35305.3	39384.3	38557.8	35318.2	32903.8	35470.2	34463.5	347	364	301	1101	0.509383	0.518447
11	YPW2879	TATA.26	SINGLE	G05	5	G	1	0.176016	0.688747	0.338636	0.63486	70393	62083	70300	67133	70305	62043	70233	67014	69992	61697	69834	65875	16633	10906	9922	7101	52014	49851	59106	57966	1345	940	806	808	18358.3	12065.8	10893.1	8050.4	54548.2	51795.9	60895.6	59928.3	313	346	399	1139	0.242298	0.179502
1	YPW1001	WT	SINGLE	G06	6	G	1	0.228837	0.929022	0.50855	1.08518	68483	56854	70977	68354	68398	56814	70922	68223	68004	56455	70544	67166	35186	29214	37580	35846	30862	25646	31153	29433	1956	1595	1811	1887	38186.3	31660.2	40385.5	38774.2	33733.9	27988.2	33788.4	32174.9	394	359	378	1057	0.532734	0.532519
13	YPW2883	TATA.135	SINGLE	G07	7	G	1	0.179312	0.72148	0.372215	0.685129	70010	68911	71385	71895	69936	68873	71345	71753	69525	68551	70970	70673	21224	17646	16219	13202	46652	49493	53477	56251	1649	1412	1274	1220	23429.1	19479.6	17843.8	14717.5	49523.4	52087.4	55907.7	58730.1	411	322	375	1080	0.312688	0.262828
18	YPW2891	TATA.81	SINGLE	G08	8	G	1	0.185904	0.692369	0.352047	0.659907	70753	62914	75385	68136	70659	62869	75302	68009	70278	62557	74838	66754	24177	19092	21611	17373	44491	42097	51856	48040	1610	1368	1371	1341	26380.4	20920.6	23424.5	19117.2	47193	44480.7	54288.9	50496	381	312	464	1255	0.352085	0.312017
21	YPW1209	m66	SINGLE	G10	10	G	1	0.209004	0.758226	0.41275	0.776753	70170	57891	66305	71600	69794	57829	66250	71482	68644	57264	65946	70555	31223	24874	28662	30141	35560	30836	35646	38565	1861	1554	1638	1849	33955.9	27125.9	31034.4	32807.3	38414	33255.1	38197.3	41459.7	1150	565	304	927	0.467529	0.446491
29	YPW2934	m76.TATA.26	SINGLE	G11	11	G	1	0.172722	0.641998	0.33194	0.649151	71789	64578	70477	72756	71560	64540	70441	72687	70826	64298	70131	71864	12302	8033	5529	3999	57389	55999	64070	67191	1135	266	532	674	13699.7	8349.37	6139.14	4755.21	59749.7	56616.2	65507.5	69246.4	734	242	310	823	0.176522	0.125453
16	YPW2888	m75.TATA.42	SINGLE	G12	12	G	1	0.166134	0.695994	0.318566	0.663499	69369	66697	71140	71474	69225	66671	71106	71352	68680	66366	70800	70288	15948	11022	9421	6585	51364	54218	60542	62917	1368	1126	837	786	17697.1	12401.8	10423.1	7498.14	53959.5	56592.7	62439.9	64917.8	545	305	306	1064	0.236927	0.168945
12	YPW2894	TATA.129	SINGLE	H01	1	H	1	0.1925	0.776753	0.33194	0.739802	69498	55756	73908	74078	69438	55739	73857	73967	68855	55478	73556	73045	25857	19707	24938	22962	41217	34325	47150	48360	1781	1446	1468	1723	28343.3	21700.8	26939.8	25278.6	44122.3	36725.2	49627.3	51333.2	583	261	301	922	0.3855	0.364728
37	YPW2952	m75.TATA.22	SINGLE	H02	2	H	1	0.169428	0.688747	0.28523	0.63486	70912	55156	71433	70741	70822	55136	71349	70634	70306	54853	70983	69383	16384	9897	9425	7227	52550	44037	60802	61296	1372	919	756	860	18139	11033.8	10329.8	8234.65	55150.6	45925.3	62518.1	63408.3	516	283	366	1251	0.237677	0.183502
19	YPW1200	m75	SINGLE	H03	3	H	1	0.199099	0.80662	0.355404	0.791652	69994	63942	72091	71170	69904	63894	72036	71056	69420	63515	71712	70139	26270	21994	23309	20550	41381	40111	46844	47935	1769	1410	1559	1654	28743.7	23926	25417.9	22745.5	44260.1	42473.1	49508	50852.1	484	379	324	917	0.388317	0.354142
10	YPW2868	m63.m89	SINGLE	H04	4	H	1	0.149677	0.670694	0.278579	0.620623	71524	56051	72771	69139	71415	56033	72695	69030	70914	55819	72274	68035	21982	14326	16257	13117	47340	40321	54910	53691	1592	1172	1107	1227	24116.4	15847.3	17665.2	14647.2	50100.1	42476.1	57034.2	56159.2	501	214	421	995	0.3171	0.262155
32	YPW2941	m75.m63.TATA.22	SINGLE	H05	5	H	1	0.143099	0.677904	0.271932	0.649151	71067	66164	70766	69630	70999	66129	70728	69539	70571	65867	70467	68741	9492	6176	4077	2637	60042	59474	65934	65624	1037	217	456	480	10735.2	6427.96	4589.7	3165.11	62383.1	60027.7	67306.9	67301.3	428	262	261	798	0.136509	0.0940746
17	YPW2889	TATA.42	SINGLE	H06	6	H	1	0.152968	0.688747	0.28523	0.656318	70635	63677	70986	71182	70568	63631	70915	71095	70139	63320	70560	70178	21331	16263	16256	13092	47212	45785	53130	55817	1596	1272	1174	1269	23463.4	17914	17754.7	14668.3	49995.2	48124.1	55365.2	58396.1	429	311	355	917	0.311206	0.262104
31	YPW2940	m75.TATA.26	SINGLE	H07	7	H	1	0.136522	0.645573	0.278579	0.617073	70360	58312	69982	70927	70278	58280	69951	70812	69896	57992	69668	69899	13331	7937	7065	4982	55294	49163	61969	64267	1271	892	634	650	14914	9008.2	7806.04	5722.49	57859.3	51165	63541.8	66084.3	382	288	283	913	0.194259	0.139002
24	YPW1215	m90	SINGLE	H08	8	H	1	0.218916	0.890247	0.416141	0.894102	68305	68914	71821	70121	68259	68878	71757	70027	67870	68472	71397	69069	32901	32624	34892	33640	33029	33944	34636	33507	1940	1904	1869	1922	35809.1	35461.3	37698.9	36524.9	35940.9	36819.1	37436.1	36388.1	389	406	360	958	0.499029	0.490085
2	YPW1189	REF	SINGLE	H09	9	H	1	0.189202	0.848152	0.416141	0.921228	68518	67779	69333	66544	68414	67750	69283	66456	67963	67393	68970	65547	33697	33030	34802	32967	32343	32466	32399	30721	1923	1897	1769	1859	36601.4	35883.7	37487.7	35788.9	35208	35303.4	35021.4	33477.3	451	357	313	909	0.510251	0.504306
22	YPW1188	m63	SINGLE	H10	10	H	1	0.185904	0.832985	0.389071	0.88255	69609	59162	69543	67787	69490	59141	69472	67670	69004	58928	69084	66762	33953	28936	33842	32264	33092	28227	33487	32604	1959	1765	1755	1894	36904.2	31594.5	36479.1	35100	36018	30863.6	36114.9	35450	486	213	388	908	0.506421	0.506202
14	YPW2884	TATA.22	SINGLE	H11	11	H	1	0.189202	0.747159	0.365485	0.795387	71026	59569	69995	70368	70955	59529	69932	70254	70463	59167	69579	69291	26556	20684	22680	20701	42179	37018	45392	46883	1728	1465	1507	1707	28969.6	22696.5	24719.6	22975.1	44995.9	39462.9	47965	49874.4	492	362	353	963	0.386353	0.358462
27	YPW2928	m76.m90.TATA.26	SINGLE	H12	12	H	1	0.123376	0.667095	0.28523	0.63486	70831	69272	72698	72737	70742	69242	72669	72647	70303	68896	72352	71653	10721	6566	4788	3197	58522	61648	67387	68193	1060	682	177	263	12007.8	7359.29	4988.59	3488.47	60820.3	63374.9	67896	69063.3	439	346	317	994	0.154832	0.0962559
21	YPW1209	m66	SINGLE	A01	1	A	2	0.209004	0.848152	0.446754	0.710534	70835	61954	74335	70839	70776	61938	74255	70731	70392	61687	73854	69846	32212	27577	32595	29955	36361	32332	39484	37957	1819	1778	1775	1934	34887	30176	35176.4	32748	39146.3	35072.6	42235.8	40979.5	384	251	401	885	0.469748	0.460315
4	YPW2854	m76.m66	SINGLE	A02	2	A	2	0.156258	0.641998	0.341986	0.484423	70925	56060	69612	64320	70876	56049	69578	64201	70537	55836	69337	62945	10898	5545	4470	2669	58667	49663	64455	59765	972	628	412	511	12079.5	6277.92	4936.25	3233.99	60766.6	51230.7	65649.2	61485	339	213	241	1256	0.156659	0.100438
2	YPW1189	REF	SINGLE	A03	3	A	2	0.199099	0.791652	0.494747	0.832985	67107	58370	67889	69636	67030	58345	67836	69471	66695	57979	67496	68157	31669	27168	32629	33470	33248	29069	33110	32804	1778	1742	1757	1883	34314.6	29752	35258.1	36304	35936.9	31712	35752	35619.1	335	366	340	1314	0.487838	0.483098
20	YPW1156	m76	SINGLE	A04	4	A	2	0.13981	0.617073	0.271932	0.47412	71010	61335	68437	68331	70918	61292	68376	68210	70529	61006	68047	66994	17211	11477	10356	7863	51919	48560	56888	58223	1399	969	803	908	19012.7	12681.5	11330.3	8937.84	54532.9	50525.6	58632	60366.4	389	286	329	1216	0.248966	0.191165
11	YPW2879	TATA.26	SINGLE	A05	5	A	2	0.133235	0.581746	0.291887	0.470691	71613	62760	68158	67677	71496	62732	68098	67573	71102	62508	67772	66687	16221	10733	8633	6625	53553	50842	58399	59328	1328	933	740	734	17914.4	11880.3	9515.26	7481.64	56087.5	52790.3	60101.3	61160.3	394	224	326	886	0.232479	0.174308
15	YPW2885	TATA.2	SINGLE	A06	6	A	2	0.152968	0.667095	0.352047	0.546732	69387	55973	67667	66434	69302	55907	67639	66282	68970	55519	67363	65069	30813	24039	29124	27752	36470	29963	36654	35643	1687	1517	1585	1674	33275.3	26235.4	31415.4	30164.6	39074.7	32326.8	39128.1	38265.6	332	388	276	1213	0.457961	0.44515
28	YPW2930	m75.m90.TATA.26	SINGLE	A07	7	A	2	0.0839789	0.439936	0.199099	0.311888	70140	54791	61723	58180	70057	54751	61639	58041	69768	54343	61253	56778	11836	6132	4482	3088	56945	47544	56365	53432	987	667	406	258	13048	6918.77	4945.24	3377.01	59014.5	49139.6	57490.9	54226.6	289	408	386	1263	0.172082	0.114241
25	YPW1217	m91	SINGLE	A09	9	A	2	0.15955	0.773039	0.382323	0.585265	69595	57905	72523	69810	69507	57884	72467	69679	69121	57630	72159	68452	33910	28537	36647	34915	33456	27424	33727	31887	1755	1669	1785	1650	36548.4	31057.3	39362.3	37428.3	36082.6	29911.1	36368.2	34325.4	386	254	308	1227	0.50337	0.509944
6	YPW2857	m75.m63	SINGLE	A10	10	A	2	0.100387	0.532808	0.26197	0.409361	72337	54439	71431	55932	72256	54373	71382	55817	71920	53812	71040	54838	11713	6104	5339	3004	59182	46981	65256	51612	1025	727	445	222	12966	6962.02	5847.64	3252.78	61359	48716.5	66478.9	52294.1	336	561	342	979	0.165216	0.114985
26	YPW2925	m75.m63.TATA.26	SINGLE	A11	11	A	2	0.123376	0.578231	0.301881	0.480986	69842	54580	71409	68664	69776	54551	71331	68517	69426	54209	70957	67320	9909	5486	4119	2658	58616	48484	66358	64124	901	239	480	538	10995.2	5765.2	4658.79	3250.77	60612.7	49078.3	67801.3	65983.3	350	342	374	1197	0.144604	0.101649
13	YPW2883	TATA.135	SINGLE	A12	12	A	2	0.113521	0.574719	0.28523	0.453582	68510	65128	72846	67289	68457	65084	72787	67168	68117	64759	72486	66025	21717	17780	17592	13839	44899	45591	53667	50976	1501	1388	1227	1210	23740	19601.4	19170.3	15364.2	47479.1	48090.3	55965.5	53347.1	340	325	301	1143	0.326003	0.28057
8	YPW2863	m75.m90	SINGLE	B01	1	B	2	0.195799	0.692369	0.378952	0.553711	72429	61193	74703	71268	72378	61174	74681	71190	71989	60991	74443	70281	14324	8823	8246	6071	56412	51288	65539	63554	1253	880	658	656	15892.7	9877.95	9011.24	6816.37	58908.3	53274.1	67203.4	65414.5	389	183	238	909	0.202499	0.146778
1	YPW1001	WT	SINGLE	B02	2	B	2	0.222222	0.863393	0.536285	0.750844	69352	59664	69582	68091	69240	59638	69512	67988	68815	59323	69165	66896	35195	30650	36393	35548	31885	27059	31093	29609	1735	1614	1679	1739	37841.4	33122.9	38980.2	38239.7	34445.7	29431.3	33548	32141.5	425	315	347	1092	0.524672	0.531113
27	YPW2928	m76.m90.TATA.26	SINGLE	B03	3	B	2	0.172722	0.659907	0.321907	0.491303	70661	66790	67174	64319	70573	66754	67137	64238	70241	66450	66832	63075	10727	6401	4204	2708	58549	59415	62225	59828	965	634	403	539	11898.5	7139.05	4659.37	3304.34	60641.2	61014.8	63403.2	61633.7	332	304	305	1163	0.154844	0.097256
16	YPW2888	m75.TATA.42	SINGLE	B04	4	B	2	0.156258	0.656318	0.338636	0.512007	71081	56720	68059	68322	71015	56671	68023	68202	70710	56255	67769	66884	15549	9097	8716	6305	53965	46206	58377	59816	1196	952	676	763	17066	10260.2	9522.6	7191.86	56275.1	48230.8	59927.7	61754.1	305	416	254	1318	0.223682	0.164494
24	YPW1215	m90	SINGLE	B05	5	B	2	0.179312	0.817892	0.456999	0.695994	68497	57357	66003	66118	68381	57282	65978	65995	68033	56628	65708	64906	33069	27473	32205	31703	33225	27573	31833	31426	1739	1582	1670	1777	35675.5	29844.6	34714.9	34372.4	35835.5	29947.4	34333.2	34087.6	348	654	270	1089	0.498823	0.499092
9	YPW2865	m63.m90	SINGLE	B07	7	B	2	0.10367	0.446754	0.225529	0.315226	72780	58886	60247	57249	72734	58836	60196	57116	72455	58489	59914	55984	17425	11399	8976	6724	53920	46263	50349	48601	1110	827	589	659	18850.5	12431.3	9689.35	7505.56	56006.3	47923	51635.5	50145.9	279	347	282	1132	0.244236	0.197687
12	YPW2894	TATA.129	SINGLE	B08	8	B	2	0.205701	0.692369	0.365485	0.553711	70994	67927	67294	69014	70921	67865	67265	68893	70585	67525	67020	67780	25790	23090	21854	20489	43167	42873	43780	45857	1628	1562	1386	1434	28047.2	25225.2	23729.6	22402.3	45848.1	45499.2	46146.9	48363.7	336	340	245	1113	0.374001	0.350045
3	YPW1177	TDH3.Deletion	SINGLE	B09	9	B	2	0.133235	0.624177	0.278579	0.355404	72506	59720	70849	64327	72420	59692	70806	64199	72012	59390	70453	62938	10336	5416	4114	2501	60764	53404	65897	59981	912	570	442	456	11436.1	6076.76	4611.22	3003.56	62781.6	54868.9	67223.5	61553.6	408	302	353	1261	0.145373	0.0920775
22	YPW1188	m63	SINGLE	B10	10	B	2	0.182608	0.776753	0.392448	0.599369	69836	55851	68882	67053	69751	55799	68826	66896	69392	55309	68462	65814	35010	27578	34135	32752	32568	26225	32658	31277	1814	1506	1669	1785	37764.4	29856.2	36657.2	35450.3	35256.8	28465.3	35143.2	33934.2	359	490	364	1082	0.518068	0.512574
5	YPW2855	m76.m63	SINGLE	B11	11	B	2	0.12009	0.57121	0.318566	0.433126	70908	58522	65965	68528	70858	58485	65901	68409	70525	58212	65636	67221	10271	5764	3864	2593	59305	52229	61350	64095	949	219	422	533	11417.5	6019.38	4338.95	3179.6	61394.2	52777.6	62612.8	65953	333	273	265	1188	0.147623	0.0993913
2	YPW1189	REF	SINGLE	B12	12	B	2	0.143099	0.795387	0.399207	0.652733	68271	66383	73028	65526	68244	66342	72966	65387	67906	65985	72597	64310	33914	32860	36856	32495	32187	31252	33962	29914	1805	1873	1779	1901	36645.4	35693.3	39561.6	35386.7	34871.2	34038.3	36594.9	32727	338	357	369	1077	0.513063	0.512541
34	YPW3001	m75.m90.TATA.22	SINGLE	C01	1	C	2	0.169428	0.699623	0.365485	0.564201	71585	60687	71216	70398	71513	60667	71189	70269	71137	60422	70944	69255	10684	6356	4598	2848	59418	53830	66150	65873	1035	236	196	534	11938.4	6632.55	4819.84	3437.52	61673.4	54409.4	66717.7	67691.1	376	245	245	1014	0.152406	0.105606
29	YPW2934	m76.TATA.26	SINGLE	C02	2	C	2	0.162842	0.649151	0.335287	0.480986	71054	56911	68592	63556	70981	56870	68528	63443	70611	56626	68258	62145	12068	6475	5818	3772	57494	49502	62237	57848	1049	649	203	525	13357.3	7241.36	6052.03	4364.03	59687.8	51048.2	62772	59401	370	244	270	1298	0.173486	0.115673
15	YPW2885	TATA.2	SINGLE	C03	3	C	2	0.212307	0.855763	0.453582	0.710534	69584	57685	73333	64835	69497	57613	73273	64743	69127	56989	72994	63756	29761	23267	29993	24955	37622	32136	41332	37153	1744	1586	1669	1648	32280.6	25527.8	32372.9	27278.3	40346.4	34654	43980.6	39806.4	370	624	279	987	0.441669	0.419959
31	YPW2940	m75.TATA.26	SINGLE	C04	4	C	2	0.136522	0.599369	0.275255	0.446754	71009	55820	66902	60212	70937	55756	66865	60117	70571	55317	66591	59075	14516	8345	7460	5177	54860	46142	58524	53273	1195	830	607	625	16018.4	9351.49	8175.36	5899.42	57216.6	47947.9	59981.1	54900.5	366	439	274	1042	0.209237	0.153156
33	YPW2943	m76.m90.TATA.22	SINGLE	C06	6	C	2	0.13981	0.609982	0.288558	0.433126	69387	58864	71342	62698	69317	58805	71287	62568	68987	58472	70983	61368	10615	5777	4666	3021	57355	52097	65863	58043	1017	598	454	304	11850.8	6474.57	5180.42	3359.68	59554	53592.9	67169.9	59013.3	330	333	304	1200	0.156172	0.0998203
2	YPW1189	REF	SINGLE	C07	7	C	2	0.162842	0.743479	0.382323	0.638427	69006	64846	69740	69097	68957	64787	69698	68973	68595	64455	69424	67815	35741	33385	36821	36086	31217	29396	30881	30015	1637	1674	1722	1714	38253.8	35951	39483.2	38739.7	33618.9	31855.4	33391.5	32510.6	362	332	274	1158	0.533782	0.531769
20	YPW1156	m76	SINGLE	C08	8	C	2	0.133235	0.606441	0.288558	0.470691	71335	61873	69802	64854	71244	61844	69764	64745	70888	61592	69440	63599	18459	12597	11239	8026	51137	47893	57288	54721	1292	1102	913	852	20139.1	13981.6	12354.2	9041.15	53504.2	50069.4	59231.6	56685.3	356	252	324	1146	0.265231	0.208249
13	YPW2883	TATA.135	SINGLE	C09	9	C	2	0.116805	0.627735	0.281904	0.460418	72047	55107	67193	69257	71952	55086	67152	69087	71538	54885	66793	67850	23096	15190	16310	13794	46891	38461	49351	52918	1551	1234	1132	1138	25191.3	16811.8	17767.4	15222.5	49547	40676.8	51467.5	55170.5	414	201	359	1237	0.330004	0.283126
19	YPW1200	m75	SINGLE	C10	10	C	2	0.129948	0.659907	0.341986	0.525864	68441	55949	69870	67449	68361	55908	69827	67332	68005	55352	69500	66132	25613	19043	22213	19059	40755	34865	45819	45636	1637	1444	1468	1437	27898.9	21020.6	24192.1	20960.3	43424.5	37285.9	48341.2	48184.8	356	556	327	1200	0.385924	0.35325
35	YPW2947	m76.TATA.22	SINGLE	C11	11	C	2	0.0971047	0.51893	0.255335	0.395826	70562	55257	67591	67900	70496	55186	67556	67757	70191	54611	67271	66598	13827	7894	7216	5099	55193	45870	59357	60835	1171	847	698	664	15291.1	8916.69	8035.69	5859.12	57533.8	47737.9	61056	62645.8	305	575	285	1159	0.200333	0.146827
17	YPW2889	TATA.42	SINGLE	C12	12	C	2	0.113521	0.641998	0.301881	0.491303	68541	59404	67007	71201	68445	59359	66978	71054	68036	58978	66770	69983	21202	15468	14798	12825	45268	42164	50757	55923	1566	1346	1215	1235	23303.9	17221.6	16341	14355.7	47978.1	44621.1	53097.1	58447.4	409	381	208	1071	0.318971	0.268393
2	YPW1189	REF	SINGLE	D01	1	D	2	0.1925	0.874873	0.470691	0.732461	70352	60855	72324	69407	70283	60837	72265	69322	69905	60517	71985	68479	35497	30302	36950	35037	32590	28502	33112	31536	1818	1713	1923	1906	38263.7	32898.1	39888.7	37947.5	35279	31045.7	35945.2	34346.1	378	320	280	843	0.521348	0.515305
23	YPW1153	m89	SINGLE	D02	2	D	2	0.209004	0.851955	0.487862	0.699623	67926	61407	72211	67818	67854	61378	72156	67691	67437	60984	71869	66657	33128	29464	35155	32937	32556	29878	34828	31907	1753	1642	1886	1813	35765.2	31921.3	37988.4	35671	35177.9	32346.7	37652.6	34612.2	417	394	287	1034	0.504354	0.496512
12	YPW2894	TATA.129	SINGLE	D03	3	D	2	0.172722	0.663499	0.348692	0.50855	70584	56568	69038	65923	70511	56547	68998	65814	70129	56277	68666	64721	24665	18286	21774	18617	43927	36625	45610	44836	1537	1366	1282	1268	26777.9	20134.6	23498.9	20293.5	46489.6	38957.6	47819.7	47087.9	382	270	332	1093	0.35959	0.333012
18	YPW2891	TATA.81	SINGLE	D04	4	D	2	0.146388	0.692369	0.33194	0.539764	69132	61605	70067	67808	69063	61577	70011	67691	68692	61340	69579	66499	23354	18962	20168	17649	43784	41013	48036	47523	1554	1365	1375	1327	25475.5	20791.1	21988.5	19380.3	46401.9	43381.7	50472	49938.8	371	237	432	1192	0.347851	0.316165
36	YPW2951	m63.m89.TATA.22	SINGLE	D05	5	D	2	0.116805	0.649151	0.32525	0.460418	70441	58643	70916	68216	70356	58599	70874	68110	70030	58303	70551	66914	15109	9032	8003	5599	53715	48415	61799	60578	1206	856	749	737	16634.8	10072.9	8886.77	6448.03	56058	50261.9	63588.7	62527.1	326	296	323	1196	0.219531	0.157223
10	YPW2868	m63.m89	SINGLE	D06	6	D	2	0.149677	0.581746	0.301881	0.467265	70177	58274	71723	65314	70106	58264	71677	65216	69737	58050	71348	64280	23282	16564	17840	14046	44956	40127	52272	49010	1499	1359	1236	1224	25320.4	18359.6	19437	15597.6	47496.5	42543.6	54565.9	51377.2	369	214	329	936	0.341188	0.29218
37	YPW2952	m75.TATA.22	SINGLE	D07	7	D	2	0.100387	0.525864	0.252019	0.382323	70646	54997	66124	62696	70607	54927	66082	62577	70329	54229	65839	61540	16544	9822	9375	6859	52591	43502	55670	53908	1194	905	794	773	18072.8	10942	10331.9	7769.86	54849.4	45359.3	57431.4	55764.5	278	698	243	1037	0.2393	0.184195
30	YPW2939	m63.m89.TATA.26	SINGLE	D08	8	D	2	0.116805	0.652733	0.321907	0.487862	70825	55344	65130	66423	70753	55284	65095	66340	70410	54879	64858	65321	13265	6976	5913	4021	56019	47151	58368	60733	1126	752	577	567	14665	7872.63	6581.83	4660.95	58302	48880.5	59851.4	62401.8	343	405	237	1019	0.191458	0.128882
2	YPW1189	REF	SINGLE	D09	9	D	2	0.152968	0.844353	0.433126	0.688747	68733	68629	75155	64708	68653	68588	75117	64565	68267	68237	74753	63447	34881	34144	38353	32234	31602	32311	34480	29386	1784	1782	1920	1827	37602.1	36841.9	41285.5	35017.7	34235	34959.8	37310.2	32085.2	386	351	364	1118	0.52466	0.513791
14	YPW2884	TATA.22	SINGLE	D10	10	D	2	0.136522	0.725137	0.392448	0.578231	69392	57032	61079	68317	69326	56984	61053	68227	68968	56602	60856	67258	25038	18712	19158	20039	42345	36390	40191	45696	1585	1500	1507	1523	27232.4	20749.8	21185.2	22066.3	44960.6	38935.9	42789.4	48368.9	358	382	197	969	0.371577	0.339588
11	YPW2879	TATA.26	SINGLE	D11	11	D	2	0.113521	0.602903	0.298548	0.453582	70641	56370	70470	67988	70571	56316	70396	67868	70196	55824	70065	66793	17085	10511	9989	7469	51770	44230	59187	58430	1341	1083	889	894	18811.2	11858	11060.6	8522.82	54278.2	46423.8	61158	60574.2	375	492	331	1075	0.24813	0.192013
32	YPW2941	m75.m63.TATA.22	SINGLE	D12	12	D	2	0.110237	0.617073	0.308551	0.47412	70246	59427	67488	68894	70146	59373	67437	68774	69754	58920	67105	67829	10939	5839	4770	2949	57770	52384	62118	64367	1045	697	217	513	12211.4	6652.35	5017.07	3516.9	60015.7	54124.8	62726.5	66078.3	392	453	332	945	0.159208	0.100287
35	YPW2947	m76.TATA.22	SINGLE	E01	1	E	2	0.166134	0.641998	0.355404	0.546732	71167	57550	72202	69688	71085	57531	72177	69596	70708	57329	71970	68707	13206	7235	6634	4073	56303	49304	64725	64011	1199	790	611	623	14695.3	8176.31	7342.81	4774.58	58739.9	51125.1	66290.2	65868.9	377	202	207	889	0.18999	0.127965
17	YPW2889	TATA.42	SINGLE	E02	2	E	2	0.179312	0.710534	0.460418	0.578231	68357	58196	71085	68371	68322	58140	70996	68213	68034	57699	70614	67235	20360	14735	15373	11617	46179	41695	54075	54493	1495	1269	1166	1125	22351.3	16381.2	16849.8	13001.7	48799.8	44031.3	56334.4	56836.3	288	441	382	978	0.305986	0.26112
3	YPW1177	TDH3.Deletion	SINGLE	E04	4	E	2	0.15955	0.641998	0.321907	0.564201	70572	57591	66181	66990	70503	57545	66134	66925	70129	57018	65865	66103	9959	5120	3708	2677	59164	51311	61746	63184	1006	587	411	242	11171.4	5799.71	4169.36	2943.91	61396	52827.1	62995.6	64013.8	374	527	269	822	0.144077	0.0907303
16	YPW2888	m75.TATA.42	SINGLE	E05	5	E	2	0.149677	0.667095	0.335287	0.529335	69591	57169	70834	65380	69522	57135	70777	65270	69150	56702	70404	64047	16060	10482	9067	6856	51889	45926	60587	56877	1201	294	750	314	17595.1	10846.2	9962.07	7224.51	54169.4	46527.7	62306.4	57643.2	372	433	373	1223	0.236354	0.185825
2	YPW1189	REF	SINGLE	E06	6	E	2	0.185904	0.728797	0.41275	0.674297	70089	56118	70011	66093	70026	56102	69945	65996	69685	55859	69629	65021	38693	30782	38937	35593	29321	23519	29004	27618	1671	1558	1688	1810	41323.8	33231.2	41602.9	38430.4	31719.3	25757.9	31420.4	30225.2	341	243	316	975	0.568898	0.566877
14	YPW2884	TATA.22	SINGLE	E07	7	E	2	0.15955	0.688747	0.385696	0.567704	71147	55658	72260	65224	71095	55625	72217	65116	70706	55237	71862	63945	26348	18791	23378	19010	42766	35016	46988	43442	1592	1430	1496	1493	28564.8	20744.8	25401.6	20996.8	45372.1	37422	49544.5	46063.5	389	388	355	1171	0.381225	0.34923
21	YPW1209	m66	SINGLE	E08	8	E	2	0.232146	0.795387	0.467265	0.717828	67353	56419	68740	65721	67274	56371	68694	65606	66942	55883	68349	64621	29058	23132	28192	26179	36155	31131	38428	36708	1729	1620	1729	1734	31562	25450.2	30661.5	28645.2	38848.3	33690.7	41166.3	39468.7	332	488	345	985	0.445586	0.426294
24	YPW1215	m90	SINGLE	E09	9	E	2	0.185904	0.886396	0.515467	0.699623	66787	66300	62915	66117	66710	66277	62862	66001	66332	65991	62537	65052	32431	31990	30420	31303	32109	32159	30385	31923	1792	1842	1732	1826	35123.5	34750.6	33018.5	34033.1	34792.5	34924.4	32982.5	34671	378	286	325	949	0.502495	0.498683
36	YPW2951	m63.m89.TATA.22	SINGLE	E10	10	E	2	0.149677	0.638427	0.348692	0.467265	70652	55588	69911	67660	70597	55566	69848	67523	70278	55359	69567	66288	14861	8500	7803	5630	54140	45959	61097	59943	1277	900	667	715	16472.5	9593.52	8589.18	6454.56	56635.7	47905.4	62697.2	61824.5	319	207	281	1235	0.215374	0.156081
19	YPW1200	m75	SINGLE	E11	11	E	2	0.13981	0.765624	0.409361	0.624177	68818	60105	69010	65559	68749	60098	68976	65476	68334	59854	68744	64478	25923	20583	22236	18467	40707	37666	45016	44420	1704	1605	1492	1591	28306.9	22781.2	24252.3	20570.9	43478.7	40356.6	47569.4	47244.8	415	244	232	998	0.389059	0.353362
25	YPW1217	m91	SINGLE	E12	12	E	2	0.166134	0.80662	0.453582	0.685129	68586	57880	72060	67781	68490	57846	71999	67641	68061	57134	71636	66751	33759	28568	36131	33501	32489	26862	33631	31317	1813	1704	1874	1933	36496	31150.6	38976.2	36433.6	35191.3	29392.2	36409	34184.5	429	712	363	890	0.509585	0.515389
30	YPW2939	m63.m89.TATA.26	SINGLE	F01	1	F	2	0.15955	0.663499	0.33194	0.477552	71031	58859	73646	69958	70966	58850	73598	69859	70536	58557	73344	68996	13069	7494	6687	4232	56395	50256	66026	64206	1072	807	631	558	14399	8456.81	7418.41	4861.63	58580.4	52107.9	67648.4	65850.7	430	293	254	863	0.188141	0.129766
28	YPW2930	m75.m90.TATA.26	SINGLE	F02	2	F	2	0.136522	0.663499	0.352047	0.477552	71207	55670	71819	66527	71136	55654	71760	66447	70754	55396	71443	65590	11693	6125	5302	3109	57942	48619	65637	61994	1119	652	504	487	13063.3	6892.71	5877.62	3650.53	60306.5	50189.5	67027.7	63568.3	382	258	317	857	0.167918	0.111884
6	YPW2857	m75.m63	SINGLE	F03	3	F	2	0.13981	0.617073	0.291887	0.443344	71230	58131	64637	67003	71164	58113	64608	66893	70814	57808	64334	65852	11074	6497	4840	3284	58706	51120	59002	62302	1034	191	492	266	12332.5	6722.05	5402.46	3580.54	60930.4	51578.9	60352.9	63147.3	350	305	274	1041	0.158699	0.112762
5	YPW2855	m76.m63	SINGLE	F04	4	F	2	0.0971047	0.57121	0.26529	0.491303	70246	59063	67699	66052	70171	59024	67649	65959	69805	58711	67289	64954	10279	5771	4517	2731	58531	52271	62577	61744	995	669	195	479	11482.5	6551.15	4738.2	3260.37	60713.2	53946.7	63134.9	63361.8	366	313	360	1005	0.149382	0.099428
22	YPW1188	m63	SINGLE	F05	5	F	2	0.136522	0.710534	0.389071	0.599369	69825	63979	70301	66666	69742	63946	70264	66557	69389	63650	69922	65534	33477	30466	33830	31402	34101	31529	34264	32400	1811	1655	1828	1732	36185.2	32934.4	36566.2	33986.6	36825.9	34025.8	37011.8	35011.7	353	296	342	1023	0.495383	0.491427
20	YPW1156	m76	SINGLE	F06	6	F	2	0.12009	0.606441	0.328594	0.487862	70991	56839	67270	68290	70912	56801	67222	68216	70549	56340	66926	67126	18368	11306	11330	8520	50876	43948	54596	57636	1305	1086	1000	970	20065.1	12667.4	12557.8	9676.47	53266.9	46104.6	56693.6	59867.4	363	461	296	1090	0.265265	0.204619
34	YPW3001	m75.m90.TATA.22	SINGLE	F07	7	F	2	0.123376	0.613526	0.33194	0.501644	69330	60430	69282	66189	69269	60405	69237	66109	68928	60122	68919	65146	10270	5644	4679	2806	57710	53843	64057	62085	948	635	183	255	11418	6381.8	4886.73	3088.11	59781.6	55458.7	64578.6	62939.7	341	283	318	963	0.151074	0.0948779
7	YPW2860	m76.m90	SINGLE	F08	8	F	2	0.133235	0.659907	0.338636	0.525864	71469	55790	68857	66339	71389	55759	68831	66242	71032	55480	68572	65229	11014	6039	5575	4363	58956	48784	62486	60555	1062	657	511	311	12305.5	6805.32	6153.93	4709.47	61246.5	50426.5	63952.4	61550	357	279	259	1013	0.15741	0.110154
26	YPW2925	m75.m63.TATA.26	SINGLE	F09	9	F	2	0.12009	0.649151	0.311888	0.487862	70486	57731	69194	64905	70397	57705	69156	64786	70018	57393	68877	63943	9364	5276	3728	2242	59721	51856	64756	61276	933	261	393	425	10481.7	5578.63	4168.15	2707.65	61832.1	52526.1	65968	62811.9	379	312	279	843	0.135543	0.0923475
8	YPW2863	m75.m90	SINGLE	F10	10	F	2	0.123376	0.602903	0.321907	0.446754	69538	58133	72027	66278	69461	58068	71987	66199	69115	57430	71706	65422	13010	7971	7648	5664	54895	48647	63310	59476	1210	812	748	282	14514.5	8940.69	8515.08	5983.94	57347.7	50506	65229	60276.9	346	638	281	777	0.191591	0.140786
2	YPW1189	REF	SINGLE	F11	11	F	2	0.133235	0.787921	0.43653	0.695994	67961	63167	69250	64368	67905	63151	69197	64269	67561	62904	68904	63428	35118	31786	35565	32271	30645	29350	31480	29278	1798	1768	1859	1879	37878.4	34474	38412	35136.4	33282.8	31967.5	34213.5	32051.9	344	247	293	841	0.534008	0.519923
33	YPW2943	m76.m90.TATA.22	SINGLE	F12	12	F	2	0.126662	0.631296	0.308551	0.501644	70333	60611	73898	69789	70286	60587	73838	69703	69880	60205	73521	68764	10668	5716	5086	2745	58149	53801	68228	65515	1063	688	207	504	11958.7	6516.13	5321.26	3300.58	60452.9	55544.4	68814.1	67250.1	406	382	317	939	0.15502	0.0960398
23	YPW1153	m89	SINGLE	G01	1	G	2	0.185904	0.855763	0.491303	0.765624	69245	62248	72186	66013	69163	62227	72159	65954	68647	61846	71887	65177	33428	29551	34847	30949	33388	30446	35289	32358	1831	1849	1751	1870	36175	32310.8	37468	33733.4	36134	33233.4	37921	35184	516	381	272	777	0.500299	0.492541
2	YPW1189	REF	SINGLE	G02	2	G	2	0.245391	0.851955	0.529335	0.773039	68546	58929	72887	65651	68471	58900	72847	65548	68020	58490	72492	64617	35171	29870	37274	32978	31034	26908	33390	29843	1815	1712	1828	1796	37952.1	32483.9	40067.7	35718	33701.5	29432.5	36083.1	32493.3	451	410	355	931	0.531244	0.526084
15	YPW2885	TATA.2	SINGLE	G03	3	G	2	0.235455	0.821659	0.494747	0.758226	69003	58130	70785	68271	68920	58098	70747	68198	68549	57697	70386	67262	32946	27186	32860	31451	33791	28812	35792	34009	1812	1699	1734	1802	35652.6	29710.2	35424.7	34119.5	36520.5	31385.5	38430.9	36747.9	371	401	361	936	0.493669	0.485482
25	YPW1217	m91	SINGLE	G04	4	G	2	0.185904	0.81413	0.467265	0.784194	67823	54942	67421	64101	67768	54897	67383	64009	67436	54594	67133	63115	32668	26518	32648	30330	32952	26429	32668	30984	1816	1647	1817	1801	35388.1	28989.9	35373.2	33021.9	35679.9	28898.1	35393.8	33695.2	332	303	250	894	0.497836	0.50084
11	YPW2879	TATA.26	SINGLE	G05	5	G	2	0.156258	0.627735	0.358763	0.498194	70219	63982	69304	65536	70167	63961	69263	65469	69861	63614	68951	64565	16152	11391	9621	6883	52454	51213	58536	56911	1255	1010	794	771	17755.2	12639.2	10575.9	7788.06	54839.8	53293.8	60309.2	58790.5	306	347	312	904	0.235431	0.181953
1	YPW1001	WT	SINGLE	G06	6	G	2	0.222222	0.714179	0.460418	0.72148	70941	59492	67696	65615	70864	59466	67647	65511	70492	59157	67299	64589	38048	31838	37439	35634	30598	25626	28198	27227	1846	1693	1662	1728	40923.3	34474.5	40058.5	38350.4	33271.7	28078.4	30581.2	29710.2	372	309	348	922	0.554264	0.554051
13	YPW2883	TATA.135	SINGLE	G07	7	G	2	0.162842	0.710534	0.378952	0.539764	70608	64075	70550	65322	70527	64041	70495	65225	70148	63687	70156	64227	22013	16996	16385	12648	46558	45379	52583	50401	1577	1312	1188	1178	24132.2	18709.5	17904.6	14121.1	49281.7	47762.9	54835.1	52754.8	379	354	339	998	0.321025	0.272481
18	YPW2891	TATA.81	SINGLE	G08	8	G	2	0.189202	0.795387	0.429725	0.656318	69711	62574	68687	64042	69660	62539	68634	63975	69348	62268	68332	63103	23099	18942	19153	16695	44664	41877	47769	45012	1585	1449	1410	1396	25253.9	20878.3	21009.4	18516.1	47351	44403.2	50292.4	47554.1	312	271	302	872	0.340879	0.311449
4	YPW2854	m76.m66	SINGLE	G09	9	G	2	0.156258	0.747159	0.450167	0.595838	69848	55077	70168	65008	69810	55063	70109	64922	69443	54864	69810	64021	9598	4656	4218	2607	58892	49590	65376	61155	953	618	216	259	10743.4	5368.68	4461.43	2892.74	61025.3	51216.4	66017.2	62041.2	367	199	299	901	0.140137	0.0858312
21	YPW1209	m66	SINGLE	G10	10	G	2	0.182608	0.851955	0.494747	0.677904	67094	57047	69021	65985	67026	57004	68967	65908	66668	56533	68615	64977	29371	24382	28762	26235	35483	30575	38151	37002	1814	1576	1702	1740	32010.2	26661.7	31202.9	28707.6	38293.9	33033.4	40833.1	39775.2	358	471	352	931	0.452879	0.443656
29	YPW2934	m76.TATA.26	SINGLE	G11	11	G	2	0.152968	0.656318	0.341986	0.498194	69448	57783	66969	66961	69371	57748	66921	66893	68976	57422	66598	66109	12177	7425	5603	4206	55652	49763	60405	61673	1147	234	590	230	13592.3	7704.19	6282.85	4466.03	58025	50299.9	61963.6	62343.4	395	326	323	784	0.179525	0.129835
16	YPW2888	m75.TATA.42	SINGLE	G12	12	G	2	0.116805	0.588786	0.305215	0.426326	70464	63313	71683	67883	70354	63281	71609	67814	69834	62954	71263	67023	16214	11082	9598	6611	52291	50976	60869	59701	1329	896	796	711	17913	12186.9	10552	7440.3	54813.3	52832.8	62667.3	61480.3	520	327	346	791	0.236683	0.178575
12	YPW2894	TATA.129	SINGLE	H01	1	H	2	0.152968	0.773039	0.416141	0.592311	70494	59471	73951	67256	70424	59429	73899	67200	69898	59023	73557	66477	24974	19362	23031	19127	43219	38076	48993	45799	1705	1585	1533	1551	27327	21512.1	25089.5	21179.2	46045.5	40772.3	51644	48550	526	406	342	723	0.366225	0.337094
37	YPW2952	m75.TATA.22	SINGLE	H02	2	H	2	0.179312	0.710534	0.409361	0.498194	70544	58470	69939	66780	70432	58428	69896	66724	69952	58030	69546	65995	16694	10868	10011	7217	51857	46090	58601	58038	1401	1072	934	740	18492.5	12200.3	11138	8087.47	54492.6	48265.8	60664.9	59827.3	480	398	350	729	0.243527	0.190807
19	YPW1200	m75	SINGLE	H03	3	H	2	0.189202	0.739802	0.43653	0.574719	69822	61730	72250	66947	69770	61694	72181	66882	69333	61292	71865	66014	26626	21657	23585	20064	41008	38004	46775	44448	1699	1631	1505	1502	29009.5	23903.6	25624.3	22070.6	43761.3	40715.3	49339.7	47067.8	437	402	316	868	0.393678	0.363001
10	YPW2868	m63.m89	SINGLE	H04	4	H	2	0.129948	0.706893	0.305215	0.512007	69924	66076	70106	65567	69848	66041	70050	65476	69389	65780	69731	64721	21482	17608	16516	12943	46344	46693	51939	50541	1563	1479	1276	1237	23577.1	19541.1	18151.8	14493	49054.9	49376.2	54346.4	53000.2	459	261	319	755	0.316722	0.273837
32	YPW2941	m75.m63.TATA.22	SINGLE	H05	5	H	2	0.133235	0.656318	0.328594	0.446754	71114	63235	71718	64553	71025	63210	71652	64480	70651	62908	71270	63528	10598	5903	4243	2422	59066	56425	66593	60711	987	580	434	395	11794	6576.8	4731.77	2856.45	61218	57901.6	67886.7	62094.8	374	302	382	952	0.15213	0.0947086
17	YPW2889	TATA.42	SINGLE	H06	6	H	2	0.162842	0.677904	0.382323	0.543246	69602	66122	71064	66724	69515	66101	71018	66645	69099	65819	70733	65726	20945	16845	15192	11892	46598	47591	54294	52720	1556	1383	1247	1114	23022.6	18639.4	16768.8	13270.5	49314.4	50136.3	56719.7	55006.8	416	282	285	919	0.310099	0.261422
31	YPW2940	m75.TATA.26	SINGLE	H07	7	H	2	0.12009	0.641998	0.355404	0.487862	70889	56626	68784	64524	70831	56585	68743	64467	70467	56103	68468	63797	14215	8402	7504	5479	55042	46789	60250	58076	1210	912	714	242	15732.5	9507.23	8343.99	5758.17	57442.5	48777.1	61975.6	58711.9	364	482	275	670	0.20525	0.152235
24	YPW1215	m90	SINGLE	H08	8	H	2	0.205701	0.996098	0.55022	0.725137	69100	69683	68675	65469	69055	69636	68636	65394	68657	69232	68393	64601	34142	33693	33548	31451	32653	33508	32940	31266	1862	2031	1905	1884	36956	36742.3	36414.3	34279.8	35425.5	36551.7	35788.8	34089.2	398	404	243	793	0.511146	0.501376
2	YPW1189	REF	SINGLE	H09	9	H	2	0.185904	0.972254	0.539764	0.73613	69835	67056	68710	64910	69751	67021	68651	64802	69288	66616	68329	63998	35008	33809	35367	32656	32390	30908	31129	29478	1890	1899	1833	1864	37880.4	36701.1	38176.9	35501	35189	33714.9	33821.8	32227.5	463	405	322	804	0.519422	0.522413
22	YPW1188	m63	SINGLE	H10	10	H	2	0.182608	0.890247	0.491303	0.714179	69019	67591	68484	66097	68973	67564	68438	65995	68550	67248	68148	65143	32929	31362	31776	30206	33779	33891	34533	33061	1842	1995	1839	1876	35680.3	34316.6	34497	32978.6	36553.8	36922.9	37330.6	35918.3	423	316	290	852	0.493629	0.480622
14	YPW2884	TATA.22	SINGLE	H11	11	H	2	0.15955	0.732461	0.395826	0.585265	70565	58991	69780	66185	70507	58953	69732	66101	70073	58602	69461	65280	25887	20013	22564	20108	42476	37119	45373	43583	1710	1470	1524	1589	28264.5	22022.7	24625.4	22236.7	45281.2	39590	47977.6	46341.7	434	351	271	821	0.37867	0.350294
27	YPW2928	m76.m90.TATA.26	SINGLE	H12	12	H	2	0.12009	0.609982	0.335287	0.498194	71294	56968	73739	69301	71229	56941	73671	69191	70720	56560	73341	68273	10703	5490	4605	2669	58936	50451	68243	65146	1081	619	493	458	12014.3	6211.1	5162.03	3173.35	61285.3	52008.2	69684.9	66735.4	509	381	330	918	0.153693	0.0981391
21	YPW1209	m66	SINGLE	A01	1	A	3	0.185904	0.787921	0.372215	0.652733	70091	58414	72508	68939	70036	58400	72470	68848	69647	58147	72204	67497	30937	25086	30455	27871	37000	31472	40171	37900	1710	1589	1578	1726	33428.8	27384.3	32720	30337.1	39645	33950.9	42655.2	40632.4	389	253	266	1351	0.455378	0.443545
4	YPW2854	m76.m66	SINGLE	A02	2	A	3	0.166134	0.624177	0.275255	0.529335	69614	54506	62315	64686	69568	54461	62271	64601	69253	54047	62039	63420	11177	5673	3983	2960	57138	47693	57682	60178	938	681	374	282	12322.4	6471.43	4406.14	3273.27	59136.4	49361.3	58767.6	61095.8	315	414	232	1181	0.16361	0.106304
2	YPW1189	REF	SINGLE	A03	3	A	3	0.2024	0.878709	0.426326	0.840559	67180	62723	68881	62917	67085	62704	68834	62811	66704	62396	68544	61677	34035	31004	34797	30822	30937	29621	32113	29081	1732	1771	1634	1774	36675.3	33680.9	37281.5	33509.2	33494.6	32257.5	34531.9	31716.6	381	308	290	1134	0.523841	0.511406
20	YPW1156	m76	SINGLE	A04	4	A	3	0.129948	0.567704	0.222222	0.470691	68312	55687	64865	64955	68253	55655	64808	64855	67955	55393	64513	63698	17172	11858	10648	8429	49499	43250	53155	54400	1284	285	710	869	18834.1	12217.6	11516.9	9469.03	51873	43807.1	54658.2	56372.8	298	262	295	1157	0.257563	0.215177
11	YPW2879	TATA.26	SINGLE	A05	5	A	3	0.143099	0.627735	0.245391	0.456999	68183	54825	65872	63772	68066	54800	65836	63701	67660	54451	65582	62334	16044	9680	9124	6647	50376	43779	55749	55012	1240	992	709	675	17633.9	10905.2	9976.41	7439.32	52714.6	45825.8	57334.3	56657.9	406	349	254	1367	0.241554	0.181073
15	YPW2885	TATA.2	SINGLE	A06	6	A	3	0.179312	0.867215	0.392448	0.670694	65639	57693	65756	64805	65543	57653	65708	64706	65156	57137	65454	63548	29788	25681	29354	27266	33582	29767	34430	34524	1786	1689	1670	1758	32415	28154.4	31795	29805.2	36316.2	32365.2	37004.3	37271.1	387	516	254	1158	0.470065	0.463155
28	YPW2930	m75.m90.TATA.26	SINGLE	A07	7	A	3	0.133235	0.494747	0.228837	0.409361	71888	54945	64669	63029	71808	54855	64616	62905	71435	54149	64254	61613	11834	5768	4534	2901	58582	47724	59290	58193	1019	657	430	519	13082	6539.2	5023.46	3477.94	60734.6	49325.9	60497.5	59874.2	373	706	362	1292	0.168058	0.107829
25	YPW1217	m91	SINGLE	A09	9	A	3	0.152968	0.747159	0.352047	0.602903	66840	56482	66114	64619	66788	56457	66040	64505	66438	56128	65710	63177	32906	27693	33178	31688	31762	26833	30971	29792	1770	1602	1561	1697	35576.8	30108.7	35546.8	34260.1	34401.5	29223.5	33286.1	32311.7	350	329	330	1328	0.508845	0.507886
6	YPW2857	m75.m63	SINGLE	A10	10	A	3	0.116805	0.525864	0.26861	0.480986	71217	54193	67393	63924	71132	54172	67321	63834	70760	53887	66831	62554	11860	6432	4860	3128	57844	47213	61453	58888	1056	242	518	538	13155.1	6718.66	5450.84	3728	60066.1	47782.8	62892	60593.2	372	285	490	1280	0.170148	0.119899
26	YPW2925	m75.m63.TATA.26	SINGLE	A11	11	A	3	0.0643	0.41275	0.166134	0.295217	72007	52161	55913	56751	71936	52126	55885	56637	71589	51860	55625	55201	11172	5086	3811	2503	59558	46306	51639	52290	859	468	175	408	12217	5631.55	4009.77	2955.63	61408.7	47480.1	52136.1	53630.4	347	266	260	1436	0.157953	0.0989648
13	YPW2883	TATA.135	SINGLE	A12	12	A	3	0.110237	0.613526	0.275255	0.450167	67117	62233	62779	67716	67037	62214	62729	67571	66652	61907	62372	66088	21636	17188	15134	14500	43559	43445	46043	50391	1457	1274	1195	1197	23606.4	18862.7	16671.6	16018	46049.7	45731.7	48280.2	52703.7	385	307	357	1483	0.331866	0.283476
8	YPW2863	m75.m90	SINGLE	B01	1	B	3	0.195799	0.795387	0.321907	0.599369	71930	57920	69471	67638	71846	57906	69436	67564	71468	57680	69214	66270	14419	8726	7853	5589	55866	48133	60803	60094	1183	821	558	587	15902.5	9714.7	8503.83	6254.47	58213.3	49957.8	62201.2	61777	378	226	222	1294	0.20515	0.153467
1	YPW1001	WT	SINGLE	B02	2	B	3	0.222222	0.855763	0.372215	0.714179	68926	56102	67386	66154	68843	56091	67348	66039	68411	55895	67092	64519	35854	29433	36138	34997	30902	24909	29446	27940	1655	1553	1508	1582	38400.3	31830.1	38481.3	37464.3	33325.2	27176.3	31634.6	30228.8	432	196	256	1520	0.53709	0.541625
27	YPW2928	m76.m90.TATA.26	SINGLE	B03	3	B	3	0.166134	0.685129	0.308551	0.592311	69082	53571	63721	64732	69024	53528	63694	64626	68677	53142	63460	63175	12022	6519	4707	3327	55620	46357	58356	59346	1035	266	397	502	13297.6	6834.88	5160.38	3888.43	57768.1	46977.7	59451.9	60908.1	347	386	234	1451	0.17773	0.123288
16	YPW2888	m75.TATA.42	SINGLE	B04	4	B	3	0.162842	0.652733	0.255335	0.46384	69325	54378	62044	61748	69258	54299	61971	61658	68937	53440	61667	60340	19052	11082	9957	7249	48524	41364	50991	52311	1361	994	719	780	20839.4	12333.2	10834.9	8174.18	50971	43318.2	52523.5	54138.7	321	859	304	1318	0.281934	0.211303
24	YPW1215	m90	SINGLE	B05	5	B	3	0.199099	0.821659	0.405974	0.667095	68248	67734	67156	63411	68172	67693	67110	63318	67828	67355	66836	62114	30542	29924	30309	27662	35576	35642	34876	32818	1710	1789	1651	1634	33044.2	32532.6	32729.6	30046.1	38208.8	38407.2	37412.5	35341.9	344	338	274	1204	0.461932	0.456395
23	YPW1153	m89	SINGLE	B06	6	B	3	0.182608	0.81413	0.405974	0.706893	66796	57312	66918	65104	66725	57287	66878	64970	66363	56999	66621	63476	30376	25497	30070	28615	34277	29754	35006	33237	1710	1748	1545	1624	32890.9	28054.1	32331	30992.4	36895.2	32446.1	37384.5	35736.1	362	288	257	1494	0.469831	0.461476
9	YPW2865	m63.m90	SINGLE	B07	7	B	3	0.15955	0.588786	0.26529	0.46384	71144	60038	65600	63307	71049	60020	65518	63181	70657	59752	65079	61582	15721	9801	9314	6694	53695	48964	55533	54166	1241	987	232	722	17297.7	11008.8	9593.51	7542.91	56082.7	51054	56048.2	55914.9	392	268	439	1599	0.226475	0.166783
12	YPW2894	TATA.129	SINGLE	B08	8	B	3	0.2024	0.725137	0.405974	0.631296	69069	56382	67225	65808	68980	56321	67194	65665	68523	55539	66926	63996	25191	19211	21906	20063	41694	34882	43471	42453	1638	1446	1549	1480	27465.6	21193.6	24004.8	22051.7	44385.7	37302.2	46111	45009.4	457	782	268	1669	0.376632	0.355148
3	YPW1177	TDH3.Deletion	SINGLE	B09	9	B	3	0.133235	0.532808	0.255335	0.409361	70611	64513	64489	61935	70511	64477	64449	61793	70081	64149	64196	60414	10606	6009	4427	2876	58516	57579	59598	57269	959	561	171	269	11769.1	6660.62	4621.3	3175.14	60601.3	59008.3	60082.7	58138.2	430	328	253	1379	0.153439	0.094499
22	YPW1188	m63	SINGLE	B10	10	B	3	0.169428	0.76933	0.426326	0.699623	68327	66175	64007	64711	68246	66130	63980	64582	67842	65759	63727	63227	33526	31681	31032	30227	32487	32297	30921	31228	1829	1781	1774	1772	36284	34344	33694.6	32870.7	35216.2	34977.1	33580.4	33900.6	404	371	253	1355	0.50787	0.495186
5	YPW2855	m76.m63	SINGLE	B11	11	B	3	0.100387	0.529335	0.248704	0.395826	69091	55519	62200	63214	68994	55489	62173	63103	68630	55149	61925	61655	10338	5293	4191	2829	57287	49293	57350	58343	1005	563	384	483	11556.5	5948.24	4626.9	3365.18	59474.9	50715.1	58444.2	59922.7	364	340	248	1448	0.152872	0.0969663
2	YPW1189	REF	SINGLE	B12	12	B	3	0.136522	0.802871	0.405974	0.667095	67288	58956	68773	66096	67217	58914	68732	65931	66786	58419	68449	64629	34347	29747	35514	33602	30704	26993	31134	29237	1735	1679	1801	1790	36999.5	32307.3	38276.8	36351.5	33259.2	29471.7	33778.1	31861.8	431	495	283	1302	0.528001	0.524269
34	YPW3001	m75.m90.TATA.22	SINGLE	C01	1	C	3	0.156258	0.717828	0.301881	0.567704	71280	59226	69486	67283	71205	59209	69425	67139	70798	58952	69095	65780	12127	6197	5132	3382	57562	52060	63485	62132	1109	695	478	266	13490.5	7011.89	5677.95	3679.03	59879.1	53762.2	64803.6	62968.1	407	257	330	1359	0.174016	0.106373
29	YPW2934	m76.TATA.26	SINGLE	C02	2	C	3	0.156258	0.649151	0.238766	0.498194	71085	55350	58778	63171	71003	55328	58723	63079	70572	55012	58468	61775	12431	6545	4926	3832	57100	47802	53155	57664	1041	665	387	279	13714.9	7333.03	5371.91	4146.96	59256.5	49365.6	54177.6	58484.1	431	316	255	1304	0.178784	0.12043
15	YPW2885	TATA.2	SINGLE	C03	3	C	3	0.189202	0.844353	0.389071	0.784194	67473	56375	69645	63603	67398	56354	69601	63502	67037	56000	69308	62364	31343	25473	31561	27584	33940	28912	36143	33048	1754	1615	1604	1732	33939.8	27846	33914.4	30107.2	36606.6	31387.3	38605.2	35727.9	361	354	293	1138	0.48011	0.468383
31	YPW2940	m75.TATA.26	SINGLE	C04	4	C	3	0.110237	0.585265	0.235455	0.443344	70669	54433	61947	61906	70581	54395	61901	61794	70203	53870	61629	60397	14058	7740	6487	4468	55036	45341	54672	55318	1109	789	470	611	15447.2	8691.99	7037.95	5165.82	57242.1	47084.8	55824.2	57003.9	378	525	272	1397	0.203462	0.145815
7	YPW2860	m76.m90	SINGLE	C05	5	C	3	0.156258	0.685129	0.252019	0.536285	69225	59480	64825	64268	69156	59447	64772	64174	68790	59139	64475	62605	11574	7129	5967	4352	56180	51379	58007	57759	1036	631	501	494	12845.1	7872.29	6541.06	4903.69	58357.2	52899.1	59368.2	59308.6	366	308	297	1569	0.170824	0.121847
33	YPW2943	m76.m90.TATA.22	SINGLE	C06	6	C	3	0.143099	0.758226	0.311888	0.532808	67939	59910	65675	63119	67837	59887	65629	62823	67484	59594	65347	61313	7803	4569	3297	1936	58759	54824	61905	58698	922	201	145	679	8892.99	4799.01	3458.73	2676.66	60946	55373.1	62364.2	61246.4	353	293	282	1510	0.117229	0.0769283
2	YPW1189	REF	SINGLE	C07	7	C	3	0.172722	0.765624	0.338636	0.714179	68718	68354	68135	62599	68620	68329	68077	62475	68141	67981	67752	61075	34683	34308	34682	31112	31693	31928	31345	28315	1765	1745	1725	1648	37371.2	36957.4	37314.3	33623.7	34301.6	34514.7	33890	30749.1	479	348	325	1400	0.522523	0.517966
20	YPW1156	m76	SINGLE	C08	8	C	3	0.182608	0.656318	0.301881	0.553711	69781	54195	66612	63266	69716	54118	66518	63156	69365	53422	66087	61796	18031	10741	10403	7638	50039	41613	54841	53363	1295	1068	843	795	19714.7	12080.3	11429.6	8583.39	52412.7	43732.1	56651.8	55208.7	351	696	431	1360	0.264889	0.205161
13	YPW2883	TATA.135	SINGLE	C09	9	C	3	0.129948	0.592311	0.248704	0.456999	69993	60814	65768	63799	69940	60783	65737	63685	69646	60473	65527	62088	22580	16652	16240	12913	45579	42590	48240	48145	1487	1231	1047	1030	24590.3	18267.9	17590.7	14209.7	48122.3	44805.3	50189.3	50169.4	294	310	210	1597	0.331284	0.281084
19	YPW1200	m75	SINGLE	C10	10	C	3	0.143099	0.627735	0.311888	0.525864	68524	67047	64770	61670	68446	67029	64706	61557	68095	66828	64381	60284	26347	23801	21683	18940	40090	41446	41352	40029	1658	1581	1346	1315	28677.1	25981	23516.3	20707.3	42770.6	44070.1	43627.4	42299.9	351	201	325	1273	0.396571	0.364783
35	YPW2947	m76.TATA.22	SINGLE	C11	11	C	3	0.110237	0.560701	0.212307	0.389071	68718	54549	61044	60640	68635	54525	61018	60548	68253	54266	60758	59374	12963	7017	6106	4369	54164	46478	54468	54723	1126	771	184	282	14364.4	7937.79	6320.8	4690.84	56440.8	48241.1	54926.8	55504	382	259	260	1174	0.193112	0.131171
17	YPW2889	TATA.42	SINGLE	C12	12	C	3	0.106953	0.652733	0.295217	0.515467	68976	59719	66432	65739	68906	59673	66400	65656	68464	59296	66159	64387	20131	14593	14080	11675	46786	43486	50938	51561	1547	1217	1141	1151	22185.4	16162.5	15520.9	13099.9	49512.2	45753.4	53164.1	53921.4	442	377	241	1269	0.300835	0.251261
2	YPW1189	REF	SINGLE	D01	1	D	3	0.2024	0.913453	0.453582	0.780471	70435	58863	70633	67098	70388	58846	70603	66988	70026	58613	70378	65981	35303	28911	35325	33185	32848	27998	33212	30932	1875	1704	1841	1864	38149.9	31480.8	38115.3	36014.3	35627.3	30540.4	35945.5	33695.8	362	233	225	1007	0.518011	0.508022
23	YPW1153	m89	SINGLE	D02	2	D	3	0.215611	0.984153	0.606441	1.10167	66755	55666	63838	66195	66585	54408	56279	57514	66124	52728	47106	45517	31158	24112	21458	21137	33138	27132	24642	23464	1828	1484	1006	916	33872.3	26295.5	22933.4	22487.7	35908.6	29403.1	26187	24862.6	461	1680	9173	11997	0.484602	0.470533
12	YPW2894	TATA.129	SINGLE	D03	3	D	3	0.149677	0.710534	0.33194	0.641998	69830	54696	64726	63508	69763	54641	64619	63233	69391	54161	64268	61572	24487	17858	20000	17823	43289	34982	42893	42364	1615	1321	1375	1385	26709.3	19650.9	21844.5	19657.2	45977.7	37227.4	45274.8	44816.6	372	480	351	1661	0.361293	0.337964
36	YPW2951	m63.m89.TATA.22	SINGLE	D05	5	D	3	0.162842	0.73613	0.301881	0.602903	70012	57158	65399	62793	69920	57057	65359	62663	69532	56109	65100	61135	11177	6523	5761	3952	57274	48799	59123	56853	1081	787	216	330	12496.8	7453.87	6010.71	4325.5	59578.5	50662.3	59685	57808.8	388	948	259	1528	0.163285	0.11791
10	YPW2868	m63.m89	SINGLE	D06	6	D	3	0.179312	0.844353	0.368849	0.599369	66855	58328	66139	63293	66765	58288	66099	63172	66400	57826	65830	61564	18304	13604	13371	10355	46532	42879	51288	50129	1564	1343	1171	1080	20358.5	15325.2	14841	11680.4	49342.8	45414.2	53605.7	52397.1	365	462	269	1608	0.282312	0.240851
37	YPW2952	m75.TATA.22	SINGLE	D07	7	D	3	0.129948	0.585265	0.255335	0.470691	69304	58150	64472	62201	69235	58113	64443	62088	68935	57871	64173	60833	15901	10440	9599	6808	51747	46459	54357	53259	1287	972	217	766	17544.7	11642.4	9861.59	7710.93	54194.9	48456.2	54832.2	55096.2	300	242	270	1255	0.235055	0.183483
30	YPW2939	m63.m89.TATA.26	SINGLE	D08	8	D	3	0.166134	0.627735	0.321907	0.557205	70203	53735	66356	63662	70079	53696	66300	63545	69641	53195	66016	61939	11800	6293	5396	3764	56779	46131	60079	57638	1062	771	541	537	13104.1	7206.38	6018.07	4369.61	59005.8	47945.7	61522.6	59225.7	438	501	284	1606	0.172064	0.12004
2	YPW1189	REF	SINGLE	D09	9	D	3	0.195799	0.747159	0.372215	0.63486	66283	63283	62135	62557	66212	63254	62097	62402	65858	62939	61815	60888	32557	30965	31566	30756	31477	30208	28568	28460	1824	1766	1681	1672	35308.5	33625	34130.5	33297.1	34197.7	32846.1	31048.6	30936.2	354	315	282	1514	0.508433	0.506187
14	YPW2884	TATA.22	SINGLE	D10	10	D	3	0.179312	0.776753	0.40259	0.688747	63888	63919	59246	61612	63818	63869	59226	61529	63439	63532	59009	60431	24133	22281	19192	17659	37631	39529	38326	41250	1675	1722	1491	1522	26478.7	24649.4	21210.5	19678.9	40351.8	42397.8	40870.5	43935.1	379	337	217	1098	0.390729	0.360476
11	YPW2879	TATA.26	SINGLE	D11	11	D	3	0.0971047	0.609982	0.298548	0.46384	69043	57863	64465	64842	68937	57836	64425	64730	68486	57522	64153	63201	16101	10117	9203	6646	51029	46460	54133	55764	1356	945	817	791	17837.8	11282.5	10188.4	7573.54	53592	48417.5	55940.7	57700.6	451	314	272	1529	0.239848	0.178818
32	YPW2941	m75.m63.TATA.22	SINGLE	D12	12	D	3	0.10367	0.649151	0.295217	0.546732	67755	56709	68035	67108	67686	56667	67989	66989	67261	56314	67712	65730	9605	5133	4175	2888	56601	50524	63060	62534	1055	657	477	308	10877.3	5894.71	4713.37	3229.09	58936.5	52211.6	64463.9	63558.6	425	353	277	1259	0.145077	0.0922256
35	YPW2947	m76.TATA.22	SINGLE	E01	1	E	3	0.146388	0.688747	0.275255	0.553711	72396	59433	68661	64773	72331	59411	68568	64698	71784	59088	68220	63645	13591	8026	6308	4307	57009	50233	61378	58827	1184	829	534	511	15064.1	9020.68	6927.6	4887.13	59405.5	52099	62744.9	60282.3	547	323	348	1053	0.192507	0.137764
17	YPW2889	TATA.42	SINGLE	E02	2	E	3	0.182608	0.754533	0.305215	0.617073	68428	54584	64540	63644	68340	54558	64480	63522	67979	54292	64107	62010	21236	14350	14720	11810	45252	38694	48349	49210	1491	1248	1038	990	23237.7	15978	16044.4	13042.5	47831.3	40966.7	50327.6	51210.4	361	266	373	1512	0.319396	0.27053
3	YPW1177	TDH3.Deletion	SINGLE	E04	4	E	3	0.149677	0.732461	0.278579	0.620623	69937	60327	67264	62463	69819	60300	67231	62366	69365	60047	66971	61163	9858	5215	4159	2270	58517	54210	62651	58439	990	622	161	454	11051.2	5933.46	4340.74	2768.74	60713	55834.7	63124.4	60044.8	454	253	260	1203	0.144176	0.0877577
16	YPW2888	m75.TATA.42	SINGLE	E05	5	E	3	0.245391	1.02819	0.419533	0.863393	65768	56846	66179	61609	65696	56801	66089	61493	65256	56375	65701	60235	10096	6185	5587	4026	54084	49315	59422	55500	1076	875	692	709	11404.4	7214.94	6385.09	4830.48	56405.2	51425.4	61242.4	57525.2	440	426	388	1258	0.157308	0.111441
2	YPW1189	REF	SINGLE	E06	6	E	3	0.228837	1.08929	0.525864	0.897962	63745	56060	66321	60768	63658	56014	66265	60665	63243	55574	65895	59440	30726	26492	32072	29059	30622	27408	32049	28551	1895	1674	1774	1830	33570.1	28988.9	34733.3	31812.1	33462.9	29933.3	34709.7	31288	415	440	370	1225	0.500848	0.491503
14	YPW2884	TATA.22	SINGLE	E07	7	E	3	0.162842	0.717828	0.291887	0.699623	70605	61529	64479	61953	70539	61501	64442	61829	70113	61268	64234	60346	25087	19914	19851	17421	43376	39874	43063	41548	1650	1480	1320	1377	27364.4	21917	21619.1	19243.8	46110.8	42401.1	45355.1	43988.3	426	233	208	1483	0.366432	0.333077
21	YPW1209	m66	SINGLE	E08	8	E	3	0.199099	0.674297	0.385696	0.717828	68532	62254	64144	61856	68467	62217	64122	61751	68090	61918	63919	60392	30374	26616	27133	24266	35916	33577	35047	34460	1800	1725	1739	1666	33001.7	29108.9	29637.1	26631	38694.7	36270.7	37774.2	37118.7	377	299	203	1359	0.458199	0.442178
24	YPW1215	m90	SINGLE	E09	9	E	3	0.212307	0.784194	0.385696	0.677904	66867	56621	62598	60785	66803	56570	62565	60694	66416	56067	62333	59465	32788	26996	30400	28331	31812	27488	30251	29461	1816	1583	1682	1673	35525.8	29363.4	32925.1	30824.3	34522.4	29869.7	32771.9	31987	387	503	232	1229	0.507554	0.495485
36	YPW2951	m63.m89.TATA.22	SINGLE	E10	10	E	3	0.129948	0.567704	0.305215	0.536285	70205	54075	63369	63128	70143	54044	63317	63010	69772	53775	63005	61447	14695	7980	7036	4987	53816	44978	55342	55878	1261	817	627	582	16285.5	8969.07	7774.78	5655.93	56283.6	46764.8	56848.2	57434.1	371	269	312	1563	0.214491	0.150685
19	YPW1200	m75	SINGLE	E11	11	E	3	0.13981	0.681515	0.328594	0.536285	66907	57781	64341	63853	66866	57748	64302	63756	66550	57487	64073	62421	26816	21647	22436	20530	38004	34351	40132	40411	1730	1489	1505	1480	29272.6	23727	24503.6	22537.4	40763.8	36777.9	42643.4	42929.2	316	261	229	1335	0.413699	0.386567
25	YPW1217	m91	SINGLE	E12	12	E	3	0.149677	0.732461	0.399207	0.739802	64770	66050	67842	67061	64697	66023	67797	66958	64250	65713	67476	65813	30816	31242	32112	31560	31630	32655	33439	32395	1804	1816	1925	1858	33510.3	33946.1	34980.2	34334.9	34347.8	35399.3	36346.2	35194.2	447	310	321	1145	0.493482	0.488943
30	YPW2939	m63.m89.TATA.26	SINGLE	F01	1	F	3	0.100387	0.659907	0.271932	0.501644	71426	54635	70200	66394	71387	54612	70165	66297	70983	54359	69915	65152	11409	5905	5744	3667	58497	47813	63959	61208	1077	641	212	277	12723.8	6658.63	5987.77	3977.9	60793.4	49366	64524.7	62050.8	404	253	250	1145	0.163205	0.109926
28	YPW2930	m75.m90.TATA.26	SINGLE	F02	2	F	3	0.149677	0.645573	0.255335	0.467265	70540	53788	66649	61846	70449	53769	66590	61763	69985	53487	66342	60582	11076	5300	4421	2826	57892	47584	61513	57349	1017	603	408	407	12315.4	6003.62	4883.69	3278.17	60071.5	49090.4	62681.9	58672.7	464	282	248	1181	0.160596	0.100219
5	YPW2855	m76.m63	SINGLE	F04	4	F	3	0.106953	0.602903	0.228837	0.439936	70286	53888	66496	61026	70224	53810	66456	60955	69829	53062	66205	59733	10805	5272	4197	2769	58020	47141	61575	56742	1004	649	433	222	12025.6	6029.52	4686.52	3015.52	60187.3	48760.3	62837.3	57466.5	395	748	251	1222	0.156992	0.100586
22	YPW1188	m63	SINGLE	F05	5	F	3	0.156258	0.780471	0.348692	0.725137	68514	64944	68480	63283	68465	64905	68432	63168	68070	64561	68154	61741	31787	29385	31167	27356	34543	33426	35299	32684	1740	1750	1688	1701	34361.6	31955.4	33648.1	29835.1	37189.9	36109.2	37885.2	35314.6	395	344	278	1427	0.479225	0.467832
20	YPW1156	m76	SINGLE	F06	6	F	3	0.113521	0.674297	0.275255	0.51893	68913	64227	62262	62165	68821	64196	62234	62044	68399	63894	62010	60658	20856	14976	12261	9295	46018	47643	48694	50408	1525	1275	1055	955	22894.3	16608.4	13580.7	10455	48675.6	50055.1	50800.2	52475	422	302	224	1386	0.31187	0.239161
34	YPW3001	m75.m90.TATA.22	SINGLE	F07	7	F	3	0.106953	0.564201	0.222222	0.470691	69817	54790	63669	62314	69753	54767	63591	62225	69395	54482	63164	60718	10791	5602	4337	3067	57541	48195	58376	57401	1063	685	451	250	12084.2	6403.77	4849.46	3345.89	59831.3	49884.6	59654.3	58191.8	358	285	427	1507	0.15792	0.104132
7	YPW2860	m76.m90	SINGLE	F08	8	F	3	0.133235	0.529335	0.271932	0.501644	71279	53188	67136	65324	71218	53110	67107	65193	70885	52383	66857	63708	12205	6577	6367	4560	57554	45150	59960	58641	1126	656	530	507	13590.3	7352.24	6975.46	5127.31	59902.6	46707.2	61383.5	60209.3	333	727	250	1485	0.17496	0.127148
26	YPW2925	m75.m63.TATA.26	SINGLE	F09	9	F	3	0.12009	0.606441	0.26529	0.456999	68677	57050	65713	62678	68564	57012	65677	62582	68177	56668	65429	61116	10524	5394	4402	2836	56644	50703	60596	57833	1009	571	431	447	11750.5	6058.12	4891.08	3332.49	58823.4	52149.3	61826.5	59289.3	387	344	248	1466	0.156682	0.0961549
8	YPW2863	m75.m90	SINGLE	F10	10	F	3	0.106953	0.585265	0.271932	0.487862	70817	54068	65269	60994	70747	54043	65233	60898	70268	53795	65011	59567	13181	7423	6893	5031	55991	45595	57537	53988	1096	777	581	548	14542.9	8350.03	7566.55	5652.68	58216.4	47377.7	59031.3	55557.6	479	248	222	1331	0.190554	0.140009
2	YPW1189	REF	SINGLE	F11	11	F	3	0.156258	0.810373	0.433126	0.703257	65889	58081	65480	62582	65834	58057	65448	62461	65465	57682	65237	61146	32301	28482	32631	30377	31325	27458	30840	29052	1839	1742	1766	1717	35073.7	31111.1	35305.3	32971.9	34069.5	30055.2	33464.4	31608.6	369	375	211	1315	0.50767	0.509153
33	YPW2943	m76.m90.TATA.22	SINGLE	F12	12	F	3	0.100387	0.63486	0.281904	0.525864	69705	64190	67882	64954	69632	64150	67837	64845	69150	63807	67551	63783	10036	5863	4405	2684	58066	57299	62994	60857	1048	645	152	242	11301.8	6611.16	4577.1	2951.41	60374.4	58952.2	63433.4	61675.2	482	343	286	1062	0.147367	0.0928248
23	YPW1153	m89	SINGLE	G01	1	G	3	0.205701	1.04031	0.460418	0.848152	67214	58891	70975	67542	67172	58874	70941	67456	66771	58656	70664	66512	33606	28770	35557	33386	31202	28128	33317	31229	1963	1758	1790	1897	36587.6	31417	38271.6	36263.7	34110.7	30755.1	35973.4	34043.3	401	218	277	944	0.518547	0.505642
2	YPW1189	REF	SINGLE	G02	2	G	3	0.26861	1.00009	0.453582	0.810373	69284	59082	66900	64571	69216	59012	66848	64469	68743	58300	66631	63455	35322	29615	34625	32995	31544	27009	30351	28682	1877	1676	1655	1778	38192.1	32168.5	37163.8	35726.5	34307.9	29485.3	32780.7	31288.9	473	712	217	1014	0.528251	0.523011
15	YPW2885	TATA.2	SINGLE	G03	3	G	3	0.225529	0.996098	0.446754	0.851955	65056	65983	64040	67964	64975	65958	63981	67866	64535	65727	63641	66699	31376	31042	29633	30801	31376	32771	32355	34064	1783	1914	1653	1834	34050.5	33887.4	32077	33507	34050.5	35668.3	34871.6	36862.4	440	231	340	1167	0.5	0.486453
25	YPW1217	m91	SINGLE	G04	4	G	3	0.185904	0.867215	0.382323	0.765624	69868	61925	63229	61084	69763	61901	63189	61010	69369	61606	62959	60040	34859	30476	31676	30148	32625	29415	29656	28194	1885	1715	1627	1698	37718.2	33063.8	34143.7	32723.9	35421.8	31972.4	32070.1	30713	394	295	230	970	0.516552	0.508858
11	YPW2879	TATA.26	SINGLE	G05	5	G	3	0.166134	0.750844	0.26861	0.613526	70560	56963	65432	61067	70504	56935	65380	60968	70071	56600	65115	59970	17011	10146	9140	6269	51731	45448	55202	53043	1329	1006	773	658	18721.1	11389.7	10070.3	7040.1	54218.8	47518.6	56924.8	54658	433	335	265	998	0.247462	0.182502
1	YPW1001	WT	SINGLE	G06	6	G	3	0.179312	0.948597	0.429725	0.728797	65975	56743	64140	63111	65900	56713	64094	62965	65541	56368	63854	61684	33011	28270	32979	31829	30697	26454	29124	28159	1833	1644	1751	1696	35794.4	30763.7	35661.6	34426.6	33413.8	28893.2	31697.7	30652.6	359	345	240	1281	0.518161	0.516592
13	YPW2883	TATA.135	SINGLE	G07	7	G	3	0.15955	0.652733	0.258652	0.522395	70683	54607	64367	62571	70626	54536	64302	62483	70279	53827	64028	61227	21470	13660	13980	11200	47245	39065	49004	48992	1564	1102	1044	1035	23561.2	15087.8	15302.8	12482.4	49969	41098.8	51025.3	51109.3	347	709	274	1256	0.31245	0.25908
18	YPW2891	TATA.81	SINGLE	G08	8	G	3	0.189202	0.72148	0.368849	0.588786	68377	55511	63820	62297	68269	55483	63784	62169	67840	55190	63492	60943	22159	16058	17712	15634	44117	37830	44448	44085	1564	1302	1332	1224	24277.2	17784.1	19464.4	17222.5	46784.4	40131.2	46835	46336.7	429	293	292	1226	0.334344	0.297988
4	YPW2854	m76.m66	SINGLE	G09	9	G	3	0.143099	0.695994	0.298548	0.505095	70465	55766	62286	61851	70361	55740	62256	61764	69997	55482	62033	60582	10949	5597	4299	2832	57939	49227	57577	57506	1109	658	157	244	12299	6365.94	4477.45	3103.07	60323.6	50860.7	58021.3	58299.8	364	258	223	1182	0.158939	0.10209
21	YPW1209	m66	SINGLE	G10	10	G	3	0.176016	0.714179	0.362123	0.585265	71342	65454	64111	61937	71244	65432	64052	61834	70826	65194	63733	60614	30924	27144	26705	23563	38157	36406	35534	35526	1745	1644	1494	1525	33454.5	29497.8	28846.6	25709	40871.2	39002	37889.7	37987.3	418	238	319	1220	0.447648	0.427128
29	YPW2934	m76.TATA.26	SINGLE	G11	11	G	3	0.152968	0.63486	0.291887	0.470691	69010	60757	64142	62907	68962	60727	64108	62827	68584	60456	63842	61822	11881	6949	5316	3704	55508	52781	58031	57887	1195	726	495	231	13352.4	7806.71	5885.91	3964.22	57994.5	54507.4	59343.7	58574.6	378	271	266	1005	0.176305	0.11634
16	YPW2888	m75.TATA.42	SINGLE	G12	12	G	3	0.12009	0.659907	0.318566	0.585265	69657	57758	67081	64482	69560	57718	67030	64388	69040	57360	66706	63330	15201	9133	9032	6015	52513	47301	57430	56602	1326	926	244	713	16883.7	10262.4	9324.38	6844.21	55071.3	49280.7	57981.6	58408.6	520	358	324	1058	0.224488	0.161835
12	YPW2894	TATA.129	SINGLE	H01	1	H	3	0.162842	0.810373	0.338636	0.613526	69407	56835	66640	64116	69365	56798	66512	64009	68811	56377	65909	62975	25127	18729	21204	18775	41975	36205	43289	42701	1709	1443	1416	1499	27497.1	20690.9	23115.5	20771	44788.4	38651.1	45716.6	45330.3	554	421	603	1034	0.37446	0.340936
37	YPW2952	m75.TATA.22	SINGLE	H02	2	H	3	0.162842	0.717828	0.298548	0.581746	70871	56850	64880	62466	70775	56765	64840	62383	70227	56180	64585	61397	16462	10021	9226	6422	52416	45153	54593	54211	1349	1006	766	764	18189	11264	10149.4	7317.48	54968.6	47226.7	56290.7	56084.9	548	585	255	986	0.239002	0.181625
19	YPW1200	m75	SINGLE	H03	3	H	3	0.172722	0.802871	0.362123	0.76933	70065	59383	64441	60821	69946	59359	64387	60705	69433	59128	64087	59791	25665	19739	20211	17314	42099	37792	42439	40999	1669	1597	1437	1478	27985.6	21913.1	22143.8	19272.2	44836.8	40493.9	44917.2	43614.2	513	231	300	914	0.378741	0.343102
10	YPW2868	m63.m89	SINGLE	H04	4	H	3	0.113521	0.63486	0.252019	0.553711	71262	57542	66314	63109	71215	57511	66266	63002	70691	57143	66011	61769	21436	14415	14712	11459	47752	41445	50247	49290	1503	1283	1052	1020	23442.5	16076.3	16048.6	12724.9	50376.6	43815.7	52271.1	51367.7	524	368	255	1233	0.309823	0.258056
32	YPW2941	m75.m63.TATA.22	SINGLE	H05	5	H	3	0.126662	0.606441	0.252019	0.55022	71544	55469	63090	62632	71485	55430	63061	62500	71064	54980	62822	61387	10869	5396	4339	2528	59160	48955	58339	58453	1035	629	144	406	12125.8	6129.41	4502.64	2976.22	61402.3	50531.3	58747	59835.1	421	450	239	1113	0.155207	0.0992806
17	YPW2889	TATA.42	SINGLE	H06	6	H	3	0.129948	0.714179	0.33194	0.602903	69723	57746	62669	62529	69664	57712	62641	62428	69201	57260	62426	61444	21934	15162	14037	11680	45605	40754	47234	48621	1662	1344	1155	1143	24172.3	16915.9	15506.8	13103.1	48465.3	43199.7	49448.4	50930	463	452	215	984	0.324761	0.271157
31	YPW2940	m75.TATA.26	SINGLE	H07	7	H	3	0.123376	0.617073	0.252019	0.553711	69954	63309	64344	61697	69895	63269	64287	61611	69489	62912	64021	60565	14209	8831	6950	4676	54060	53220	56442	55242	1220	861	629	647	15741.7	9867.36	7689.36	5417.12	56469.8	55137.8	57967.3	57000.9	406	357	266	1046	0.208133	0.142318
24	YPW1215	m90	SINGLE	H08	8	H	3	0.209004	0.773039	0.419533	0.776753	69266	67188	66582	61740	69209	67159	66536	61617	68753	66795	66288	60586	32876	31902	31770	28472	33960	33115	32752	30275	1917	1778	1766	1839	35736.1	34552.6	34405.7	31202.7	36851.2	35798.7	35414.5	33062.2	456	364	248	1031	0.491891	0.490672
2	YPW1189	REF	SINGLE	H09	9	H	3	0.1925	0.840559	0.450167	0.784194	67124	57679	64534	61156	67047	57649	64484	61022	66601	57382	64142	60002	34000	28844	32629	30528	30701	26808	29873	27699	1900	1730	1640	1775	36899.7	31471.2	35126	33234.7	33503.7	29371.9	32297.6	30319.4	446	267	342	1020	0.525494	0.518292
22	YPW1188	m63	SINGLE	H10	10	H	3	0.179312	0.714179	0.378952	0.681515	69690	57781	63720	63519	69649	57736	63687	63429	69344	57329	63449	62406	33355	26018	28917	28341	34117	29683	32846	32306	1872	1628	1686	1759	36152.5	28408.1	31394	30923.8	36935.6	32180.4	35430.4	35004	305	407	238	1023	0.494353	0.467101
14	YPW2884	TATA.22	SINGLE	H11	11	H	3	0.149677	0.773039	0.395826	0.617073	65690	60950	63990	62621	65630	60922	63941	62518	65274	60661	63663	61599	23630	20136	20059	18380	39905	39055	42228	41684	1739	1470	1376	1535	26038.1	22133.8	21909.2	20424.6	42773.9	41548.6	44602.2	44374.8	356	261	278	919	0.371921	0.340187
27	YPW2928	m76.m90.TATA.26	SINGLE	H12	12	H	3	0.0774181	0.581746	0.26197	0.47412	71333	64043	66717	1084	71287	64012	66671	NA	70819	63682	66402	NA	11436	6516	4867	NA	58234	56525	61365	NA	1149	641	170	NA	12839.6	7265.82	5060.94	NA	60679.4	58110	61836.8	NA	468	330	269	NA	0.164145	0.103361
38	YPW3041	m63.m90_m63.m90	DOUBLE	A01	1	A	4	0.222222	0.656318	0.399207	0.51893	68192	57409	65663	65875	68124	57375	65617	65610	67632	57096	65414	63955	28441	23370	27612	27154	37401	32200	36174	35337	1790	1526	1628	1464	31011.5	25546	29951.2	29259.7	40217.3	34621.6	38733.7	37636	492	279	203	1655	0.431958	0.420551
42	YPW3048	TATA.42_TATA.42	DOUBLE	A02	2	A	4	0.232146	0.670694	0.426326	0.512007	66528	56356	63717	61468	66452	56312	63662	61166	66081	55963	63394	59303	28431	24130	28356	26583	35906	30337	33540	31248	1744	1496	1498	1472	30950.9	26293.1	30542.7	28733.8	38630	32671.7	35852.6	33518	371	349	268	1863	0.441907	0.443021
51	YPW2682	URA3	SINGLE	A03	3	A	4	0.26197	0.82543	0.553711	0.706893	65536	60871	57544	60616	65446	60831	57518	60354	65013	60497	57319	58620	30765	29746	30526	32795	32440	28978	25181	24384	1808	1773	1612	1441	33453.4	32417.2	33025.4	35071.6	35176.3	31626	27525	26446.3	433	334	199	1734	0.486749	0.506539
44	YPW3055	m75_m75	DOUBLE	A04	4	A	4	0.222222	0.667095	0.392448	0.51893	65811	53959	62181	59416	65726	53938	62147	59106	65321	53715	61892	57421	31490	27269	33666	32528	32073	24948	26765	23626	1758	1498	1461	1267	34119	29550.1	35946.3	34538.3	34718.1	27162.4	28877.3	25432.9	405	223	255	1685	0.495414	0.522225
40	YPW3045	m63.m90_TATA.26	DOUBLE	A05	5	A	4	0.172722	0.505095	0.305215	0.385696	67480	53321	57620	51947	67415	53270	57579	51784	67113	52753	57374	50028	25037	19422	21938	19350	40434	32075	34283	29713	1642	1256	1153	965	27325	21166.7	23552.2	20704.4	43119.3	34138	36156.7	31275.9	302	517	205	1756	0.382414	0.377148
39	YPW3043	TATA.26_TATA.26	DOUBLE	A07	7	A	4	0.156258	0.529335	0.315226	0.358763	66105	54583	59912	58572	66044	54559	59807	58322	65677	54230	59346	56643	21711	16942	18042	16941	42371	36031	40003	38620	1595	1257	1301	1082	23876.9	18630	19779.9	18381.3	45080.1	38204.6	42272.6	40518.8	367	329	461	1679	0.3388	0.319823
49	YPW3064	m66_TATA.129	DOUBLE	A08	8	A	4	0.225529	0.670694	0.467265	0.560701	64567	54955	60003	59242	64498	54921	59955	59046	64162	54545	59722	57554	32046	28423	33185	33498	30313	24681	24864	22500	1803	1441	1673	1556	34775.9	30637.2	35824.4	36003.3	32992.8	26793.4	27261.1	24693.6	336	376	233	1492	0.513895	0.535233
45	YPW3056	TATA.81_TATA.81	DOUBLE	A09	9	A	4	0.199099	0.624177	0.40259	0.501644	67448	57360	55832	61723	67370	57280	55800	61537	66975	56595	55611	59886	30164	26680	27945	31427	35040	28311	26056	26964	1771	1604	1610	1495	32756.6	29062.6	30388.7	33729	37765.4	30741.2	28443.3	29151.4	395	685	189	1651	0.46261	0.48517
48	YPW3062	TATA.129_TATA.129	DOUBLE	A10	10	A	4	0.176016	0.560701	0.345338	0.446754	65378	63433	62293	60389	65288	63386	62178	60199	64913	63043	61738	58555	25503	25738	27170	26668	37589	35713	32905	30592	1821	1592	1663	1295	28074	28005.8	29588.6	28567.5	40515.4	38242.6	35483.1	32580.5	375	343	440	1644	0.404219	0.418838
41	YPW3047	m63.m89_m63.m89	DOUBLE	A11	11	A	4	0.205701	0.620623	0.399207	0.574719	64460	67229	62171	60698	64375	67198	62128	60531	64008	66874	61903	58794	30392	33294	33390	33133	31768	31747	26779	24095	1848	1833	1734	1566	33143.8	36065.6	36092.1	35617.2	34560.7	34475	29289.4	26328.7	367	324	225	1737	0.488932	0.511892
50	YPW2679	URA3	DOUBLE	A12	12	A	4	0.162842	0.564201	0.328594	0.395826	64602	57169	62430	61599	64523	57103	62392	61364	64136	56384	62142	59589	25280	23149	26558	26691	37126	31740	34028	31503	1730	1495	1556	1395	27723.8	25282.4	28801.3	28728	39904.3	34110.3	36464.6	33655.8	387	719	250	1775	0.405089	0.421742
48	YPW3062	TATA.129_TATA.129	DOUBLE	B01	1	B	4	0.189202	0.57121	0.362123	0.515467	71893	62229	61992	62237	71837	62205	61962	61997	71540	61919	61745	60369	30476	27154	28839	29537	38998	33412	31549	29541	2066	1353	1357	1291	33455.2	29116.9	30844.7	31473.5	42232.5	35515.4	33615.7	31477.5	297	286	217	1628	0.438668	0.448337
43	YPW3051	m63.m89_TATA.42	DOUBLE	B02	2	B	4	0.235455	0.649151	0.443344	0.620623	68667	57868	62313	61517	68606	57817	62270	61259	68261	57444	62025	59553	35740	31158	35946	36468	30320	24788	24531	21762	2201	1498	1548	1323	39135.8	33495.7	38430.9	38647.3	33534.6	26954.1	26718.4	23596	345	373	245	1706	0.541023	0.55693
39	YPW3043	TATA.26_TATA.26	DOUBLE	B03	3	B	4	0.195799	0.557205	0.291887	0.40259	67924	52922	56477	53056	67838	52889	56447	52808	67483	52542	56219	51229	22893	17216	17879	15667	42610	34122	37284	34635	1980	1204	1056	927	25598.7	18847.6	19300.6	16905.7	45940.6	36173.5	39102.5	36251.2	355	347	228	1579	0.349495	0.335346
41	YPW3047	m63.m89_m63.m89	DOUBLE	B04	4	B	4	0.218916	0.667095	0.378952	0.588786	67697	53748	62185	60950	67608	53716	62139	60697	67247	53390	61951	58708	34767	28553	35736	35156	30219	23416	24828	22260	2261	1421	1387	1292	38240.6	30758.6	37955	37259.8	33534	25480.4	26793	24066	361	326	188	1989	0.534992	0.549424
38	YPW3041	m63.m90_m63.m90	DOUBLE	B05	5	B	4	0.162842	0.480986	0.26861	0.389071	69370	55184	56241	53253	69276	55145	56202	52976	68886	54821	55968	51135	21600	17503	18602	16973	45492	36229	36457	33231	1794	1089	909	931	24012.1	18970.5	19835.7	18236.7	48587.8	38101.4	38002.3	34813.3	390	324	234	1841	0.321946	0.325746
50	YPW2679	URA3	DOUBLE	B06	6	B	4	0.1925	0.55022	0.328594	0.477552	65595	53933	59840	60033	65464	53875	59812	59719	65090	53539	59620	57687	26155	22174	25987	26210	36710	29968	32415	30233	2225	1397	1218	1244	29319	24171.8	27750.3	28033.1	40253	32177	34313.2	32145	374	336	192	2032	0.41605	0.425262
44	YPW3055	m75_m75	DOUBLE	B07	7	B	4	0.176016	0.592311	0.392448	0.564201	65543	67377	65434	60711	65460	67346	65320	60505	65128	67005	64862	58947	30643	33382	34536	33338	32174	31902	28730	24161	2311	1721	1596	1448	34081.7	35983.2	37006.9	35636.5	35669	34464.2	31053.8	26225.3	332	341	458	1558	0.487814	0.511335
51	YPW2682	URA3	SINGLE	B08	8	B	4	0.232146	0.588786	0.453582	0.567704	67873	54262	62544	60309	67810	54225	62509	60109	67498	53797	62304	58444	32078	27297	34231	33573	32965	24975	26494	23459	2455	1525	1579	1412	35743.9	29619.2	36707.4	35829.6	36664.4	27229.3	28767.6	25461.2	312	428	205	1665	0.493181	0.522211
40	YPW3045	m63.m90_TATA.26	DOUBLE	B09	9	B	4	0.162842	0.470691	0.295217	0.40259	68869	62617	60423	61232	68806	62570	60352	60984	68461	62261	60008	59010	25831	23629	23521	23547	40533	37220	35168	34221	2097	1412	1319	1242	28765	25603.5	25379.3	25304.1	43943.4	39518.1	37293.4	36211.6	345	309	344	1974	0.389232	0.388322
47	YPW3059	m66_m66	DOUBLE	B10	10	B	4	0.172722	0.560701	0.362123	0.546732	67903	63918	62052	63045	67833	63883	62023	62839	67444	63603	61817	60911	32699	32320	33871	34935	32469	29601	26411	24493	2276	1682	1535	1483	36117	34880.8	36275.2	37303.6	35879	32087.8	28623.7	26596.9	389	280	206	1928	0.501765	0.521955
45	YPW3056	TATA.81_TATA.81	DOUBLE	B11	11	B	4	0.1925	0.567704	0.378952	0.55022	67649	57590	63118	61974	67583	57563	63078	61749	67221	57317	62827	59879	30732	27024	31413	30760	34004	28665	29810	27633	2485	1628	1604	1486	34398.2	29442.4	33840.3	33029.9	37796	31131.4	32195.3	29823.2	362	246	251	1870	0.474728	0.485266
42	YPW3048	TATA.42_TATA.42	DOUBLE	B12	12	B	4	0.176016	0.51893	0.328594	0.47412	64422	56696	67207	61444	64349	56672	67170	61228	63957	56396	66916	59464	27264	24483	30201	27113	34340	30366	35044	30778	2353	1547	1671	1573	30665.3	26724.5	32647.6	29424.2	38013.4	32774.4	37615	33189	392	276	254	1764	0.442569	0.446371
47	YPW3059	m66_m66	DOUBLE	C01	1	C	4	0.235455	0.681515	0.43653	0.692369	69141	60718	65302	65274	69042	60685	65274	64983	68615	60352	65089	63345	32754	30548	35187	36203	34032	28196	28319	25544	1829	1608	1583	1598	35480.2	32992.9	37652.3	38752.2	36793.2	30576.4	30612.1	27813.1	427	333	185	1638	0.490432	0.520019
41	YPW3047	m63.m89_m63.m89	DOUBLE	C02	2	C	4	0.26529	0.677904	0.477552	0.717828	65625	55580	64611	61309	65568	55548	64534	61079	65270	55305	64179	59631	32395	28519	35398	34217	31030	25205	27226	23830	1845	1581	1555	1584	35182.6	30940.9	37839.5	36750	33777.9	27529.2	29462.9	26074.9	298	243	355	1448	0.510761	0.530843
38	YPW3041	m63.m90_m63.m90	DOUBLE	C03	3	C	4	0.179312	0.553711	0.321907	0.416141	69482	54036	58183	60376	69401	53979	58154	60134	69060	53536	57939	58052	26687	20573	22891	22915	40717	31641	33904	33963	1656	1322	1144	1174	29013.3	22428	24505	24571.2	43395.7	33782.7	35744.1	35851.6	341	443	215	2082	0.395926	0.394013
50	YPW2679	URA3	DOUBLE	C04	4	C	4	0.185904	0.494747	0.298548	0.395826	69299	51799	58237	55126	69240	51741	58187	54907	68888	51232	57955	53377	27389	20736	24116	23110	39837	29316	32764	29123	1662	1180	1075	1144	29740	22412.2	25652.1	24763.5	42501.2	31197.5	34465.5	30909.1	352	509	232	1530	0.407417	0.414289
45	YPW3056	TATA.81_TATA.81	DOUBLE	C05	5	C	4	0.195799	0.574719	0.355404	0.498194	67103	66155	58243	58645	67015	66110	58190	58359	66692	65786	57920	56694	31748	32005	30170	30380	33251	32129	26407	25041	1693	1652	1343	1273	34268.1	34481.4	32230.8	32354.1	35810.3	34608.6	28378.2	26891.9	323	324	270	1665	0.488438	0.499033
48	YPW3062	TATA.129_TATA.129	DOUBLE	C07	7	C	4	0.156258	0.536285	0.338636	0.467265	68431	62240	60300	59127	68364	62199	60250	58883	68019	61918	59975	57237	30056	27424	28559	28578	36266	32992	29970	27354	1697	1502	1446	1305	32525.4	29610.7	30710.8	30549.9	38895	35317.7	32156.6	29297.4	345	281	275	1646	0.453183	0.453919
39	YPW3043	TATA.26_TATA.26	DOUBLE	C08	8	C	4	0.116805	0.338636	0.1925	0.245391	70394	48931	51558	45338	70331	48891	51515	45143	70075	48552	51219	43382	24192	16130	16460	13205	44527	31394	33955	29431	1356	1028	804	746	26047.8	17526.4	17543.9	14200.8	46802.8	33139.1	35336.4	30733.9	256	339	296	1761	0.352042	0.339407
42	YPW3048	TATA.42_TATA.42	DOUBLE	C09	9	C	4	0.1925	0.536285	0.335287	0.46384	68459	63477	61227	60914	68371	63428	61197	60720	67964	63073	60947	58696	29384	27801	27743	27353	36821	33661	31767	29925	1759	1611	1437	1418	31928.7	30144	29851.5	29448.8	39564.5	36158.3	33972.8	32084.6	407	355	250	2024	0.443834	0.452328
44	YPW3055	m75_m75	DOUBLE	C10	10	C	4	0.172722	0.512007	0.348692	0.498194	67160	52639	63142	57955	67020	52604	63094	57765	66634	52208	62817	56384	33294	26716	34483	32552	31589	24116	26888	22437	1751	1376	1446	1395	35943.8	28816.1	36747.8	34787.1	34192.8	26145.7	28972.4	24411.1	386	396	277	1381	0.513139	0.525574
51	YPW2682	URA3	SINGLE	C11	11	C	4	0.166134	0.55022	0.335287	0.578231	65402	54208	60524	59700	65310	54175	60489	59519	64945	53819	60296	57966	31552	27188	33020	33076	31627	25111	25767	23357	1766	1520	1509	1533	34200	29498.8	35383.1	35521.1	34277	27361.4	27942.5	25534.1	365	356	193	1553	0.499406	0.519857
49	YPW3064	m66_TATA.129	DOUBLE	C12	12	C	4	0.182608	0.602903	0.382323	0.546732	66905	57861	67150	62535	66816	57825	67077	62285	66394	57495	66732	60383	32767	29613	36963	35045	31774	26269	28083	23797	1853	1613	1686	1541	35560.9	32082.3	39616.1	37521	34539.4	28641.6	30503.8	25972.9	422	330	345	1902	0.507693	0.52992
45	YPW3056	TATA.81_TATA.81	DOUBLE	D01	1	D	4	0.222222	0.645573	0.433126	0.688747	68892	64210	68061	66198	68853	64187	67988	65958	68496	63902	67662	63997	32236	31032	34677	33861	34361	31176	31275	28519	1899	1694	1710	1617	35054.7	33571	37287.3	36359	37240.3	33719	33797	30878	357	285	326	1961	0.484046	0.498843
39	YPW3043	TATA.26_TATA.26	DOUBLE	D02	2	D	4	0.199099	0.536285	0.301881	0.419533	69928	60614	61342	56581	69877	60572	61306	56307	69519	60289	61088	54711	26180	21750	22089	19054	41692	37297	37818	34543	1647	1242	1181	1114	28479.6	23466.2	23721.3	20581.7	44378.2	39352.2	39771.6	36407	358	283	218	1596	0.385726	0.368351
42	YPW3048	TATA.42_TATA.42	DOUBLE	D04	4	D	4	0.225529	0.652733	0.358763	0.553711	66399	64769	60434	60479	66329	64738	60391	60197	65977	64441	60190	58341	34569	34660	33055	32178	29573	28166	25728	24711	1835	1615	1407	1452	37396	37170.8	35259.4	34458.5	32256.6	30508.9	27755.7	26799.2	352	297	201	1856	0.538945	0.551682
51	YPW2682	URA3	SINGLE	D05	5	D	4	0.2024	0.631296	0.389071	0.578231	68962	52166	59057	59256	68884	52121	59024	59068	68517	51746	58800	57584	33268	25998	32431	33061	33430	24335	24954	23012	1819	1413	1415	1511	35994.3	28141.2	34652.6	35477.6	36160.7	26431.5	26989.6	25153.3	367	375	224	1484	0.498786	0.51652
46	YPW3058	m75_TATA.81	DOUBLE	D07	7	D	4	0.301881	1.04031	0.848152	1.51211	64483	64025	61534	57302	64380	64002	61480	57093	63938	63726	61105	55366	33755	35505	41009	40701	28427	26562	18619	13227	1756	1659	1477	1438	36467.7	38123	43582	43400.2	30988.7	28938.5	20593.6	15074.9	442	276	375	1727	0.542842	0.572043
48	YPW3062	TATA.129_TATA.129	DOUBLE	D08	8	D	4	0.185904	0.50855	0.365485	0.501644	69347	62376	61631	58863	69298	62344	61575	58640	68969	62035	61342	57063	28808	26028	27521	27091	38463	34481	32311	28573	1698	1526	1510	1399	31240.8	28216.9	29727.8	29171.1	41142	36885.2	34639.1	30690.4	329	309	233	1577	0.428238	0.430151
50	YPW2679	URA3	DOUBLE	D09	9	D	4	0.172722	0.491303	0.298548	0.419533	69639	52569	61187	59442	69578	52530	61073	59171	69212	52161	60691	57524	27122	20958	25864	24971	40407	29808	33465	31186	1683	1395	1362	1367	29494.4	22937.9	27824.7	26949.6	43117.1	32034.8	35601.6	33316.8	366	369	382	1647	0.401635	0.412835
43	YPW3051	m63.m89_TATA.42	DOUBLE	D10	10	D	4	0.166134	0.592311	0.419533	0.595838	68331	59495	61927	57751	68278	59463	61881	57530	67918	59212	61540	55952	32003	29594	32823	31073	34103	27880	27134	23366	1812	1738	1583	1513	34692.7	32227.3	35276.5	33458.4	36850.3	30461.5	29436.6	25535	360	251	341	1578	0.484116	0.514911
38	YPW3041	m63.m90_m63.m90	DOUBLE	D11	11	D	4	0.13981	0.467265	0.26861	0.433126	69575	64484	62124	58517	69499	64447	62063	58321	69112	64112	61655	56902	26129	24007	23285	20764	41235	38552	36923	34755	1748	1553	1447	1383	28572.7	26172.8	25306.6	22681.5	44081	41089	39281.1	37032.6	387	335	408	1419	0.387878	0.38375
41	YPW3047	m63.m89_m63.m89	DOUBLE	D12	12	D	4	0.166134	0.581746	0.395826	0.564201	69256	61511	66283	62340	69214	61460	66243	62045	68797	61205	65961	60428	34798	32392	37554	35955	32098	27206	26701	22916	1901	1607	1706	1557	37688.7	34875.7	40271.6	38487.1	34911.9	29549.4	29126.3	25094.5	417	255	282	1617	0.520181	0.543508
42	YPW3048	TATA.42_TATA.42	DOUBLE	E01	1	E	4	0.242078	0.606441	0.389071	0.585265	69514	63021	67785	65392	69416	62998	67746	65092	69016	62709	67538	63389	29691	27442	31054	29053	37421	33636	34852	32763	1904	1631	1632	1573	32443	29809.6	33456.3	31366.6	40393.8	36169.9	37348.5	35171.2	400	289	208	1703	0.44241	0.449294
44	YPW3055	m75_m75	DOUBLE	E02	2	E	4	0.26861	0.652733	0.456999	0.663499	69090	53402	66514	61311	69043	53350	66480	60922	68673	52997	66280	59006	34868	27628	36762	34277	31974	23926	27960	23237	1831	1443	1558	1492	37655	29846.3	39213.2	36675	34681.7	26040.4	30197.4	25343.2	370	353	200	1916	0.521648	0.535904
40	YPW3045	m63.m90_TATA.26	DOUBLE	E03	3	E	4	0.258652	0.681515	0.41275	0.585265	69523	65363	63413	61509	69429	65320	63379	61197	69050	64994	63099	59463	29087	27271	27205	25731	38178	36137	34475	32295	1785	1586	1419	1437	31651	29545.9	29254.3	27809.3	40985.5	38635.8	36692.7	34536.9	379	326	280	1734	0.432424	0.430088
45	YPW3056	TATA.81_TATA.81	DOUBLE	E04	4	E	4	0.271932	0.674297	0.416141	0.627735	65390	55739	59569	61024	65313	55702	59533	60790	64966	55438	59343	59259	31075	27267	31182	32042	32091	26593	26664	25747	1800	1578	1497	1470	33760.6	29643.9	33488.4	34331.9	34805.6	28950.2	28853.2	27875.9	347	264	190	1531	0.491958	0.506257
50	YPW2679	URA3	DOUBLE	E05	5	E	4	0.245391	0.585265	0.385696	0.51893	69544	63170	60566	60600	69446	63148	60516	60275	69075	62877	60236	58222	22541	20100	19931	20003	44928	41410	39063	36981	1606	1367	1242	1238	24715.8	21943.2	21616.6	21696.2	47667.7	43758.1	41174.4	39060.7	371	271	280	2053	0.334094	0.326776
48	YPW3062	TATA.129_TATA.129	DOUBLE	E06	6	E	4	0.395826	0.932927	0.595838	0.851955	65988	55787	60300	59982	65934	55746	60253	59757	65571	55306	60022	58185	26996	23603	26771	27149	36679	30018	31524	29310	1896	1685	1727	1726	29705.3	26035.1	29293.7	29705.6	39680	32653.1	34188	31932.7	363	440	231	1572	0.423965	0.440182
41	YPW3047	m63.m89_m63.m89	DOUBLE	E07	7	E	4	0.2024	0.543246	0.399207	0.564201	67312	65595	62302	61440	67227	65555	62236	61172	66882	65271	61942	59482	33425	33912	35014	34729	31671	29695	25427	23208	1786	1664	1501	1545	36128.4	36465.1	37395.7	37219	34326.3	32137.6	27567.6	25384.5	345	284	294	1690	0.513472	0.533149
38	YPW3041	m63.m90_m63.m90	DOUBLE	E08	8	E	4	0.242078	0.578231	0.395826	0.512007	69061	61443	63846	60937	68997	61418	63800	60676	68608	61182	63506	59126	24400	21511	22739	21263	42484	38214	39341	36417	1724	1457	1426	1446	26777.3	23514.6	24707.1	23261.5	45345.4	40642	41704.8	38809.2	389	236	294	1550	0.364811	0.360167
39	YPW3043	TATA.26_TATA.26	DOUBLE	E09	9	E	4	0.222222	0.539764	0.338636	0.443344	68512	54801	60481	61428	68435	54772	60447	61223	68087	54422	60205	59444	22289	17524	19210	18144	44101	35520	39701	39982	1697	1378	1294	1318	24589.2	19385.9	20954.1	19905.9	46991.5	37878.9	41925.1	42278.3	348	350	242	1779	0.335728	0.330367
49	YPW3064	m66_TATA.129	DOUBLE	E10	10	E	4	0.199099	0.609982	0.41275	0.656318	67284	54594	56499	57971	67219	54508	56461	57747	66907	53906	56271	56224	32498	27571	30218	31816	32527	24806	24446	22925	1882	1529	1607	1483	35320.6	29906	32718.3	34172.5	35350.4	27060.2	26775.7	25037.4	312	602	190	1523	0.499777	0.526395
47	YPW3059	m66_m66	DOUBLE	E11	11	E	4	0.222222	0.617073	0.409361	0.620623	68229	58117	57225	60780	68162	58079	57190	60531	67793	57757	57020	58799	32727	28967	30472	33593	33086	27129	24878	23584	1980	1661	1670	1622	35691.6	31486.2	33066.1	36182.9	36061.4	29593.7	27302.5	25885.5	369	322	170	1732	0.497273	0.516383
51	YPW2682	URA3	SINGLE	E12	12	E	4	0.205701	0.588786	0.40259	0.574719	66794	57899	65340	64523	66716	57853	65305	64252	66285	57449	65024	62704	32055	29266	36419	36263	32304	26567	26967	24850	1926	1616	1638	1591	34940.3	31730.1	39008.8	38815	35196.7	28952.8	29309.8	27099.5	431	404	281	1548	0.498066	0.52417
49	YPW3064	m66_TATA.129	DOUBLE	F01	1	F	4	0.235455	0.773039	0.501644	0.795387	68910	68077	66920	65161	68830	68034	66884	64978	68274	67712	66665	63734	34856	36338	39018	38949	31463	29527	25869	23033	1955	1847	1778	1752	37839.9	39209.5	41887.8	41840.1	34346.7	32206.5	28370.9	25458.6	556	322	219	1244	0.525581	0.551704
51	YPW2682	URA3	SINGLE	F02	2	F	4	0.232146	0.703257	0.512007	0.750844	67938	57376	57534	62437	67869	57330	57501	62262	67487	56877	57286	61001	37720	32865	35183	38730	27912	22388	20460	20746	1855	1624	1643	1525	40653.2	35472.8	37903.3	41296.8	30564.9	24682.2	22729.5	22829.1	382	453	215	1261	0.57472	0.594809
38	YPW3041	m63.m90_m63.m90	DOUBLE	F04	4	F	4	0.218916	0.670694	0.392448	0.50855	67838	55264	62034	59665	67773	55244	62001	59437	67422	55008	61776	57857	36947	29742	33773	31099	28606	23722	26450	25323	1869	1544	1553	1435	39878	32150.4	36203.4	33329.1	31297.3	25955.5	28690.2	27405.5	351	236	225	1580	0.56362	0.5563
41	YPW3047	m63.m89_m63.m89	DOUBLE	F05	5	F	4	0.218916	0.699623	0.443344	0.681515	66913	64445	61564	61915	66817	64403	61533	61677	66456	64074	61347	60204	32479	32765	33740	34133	32099	29540	26019	24478	1878	1769	1588	1593	35301.5	35465.5	36232.2	36666.6	34910.5	32148.8	28304.3	26745.5	361	329	186	1473	0.502942	0.525881
39	YPW3043	TATA.26_TATA.26	DOUBLE	F06	6	F	4	0.162842	0.501644	0.291887	0.433126	69861	55384	63670	58779	69824	55358	63622	58529	69422	54996	63377	56864	22938	17313	19335	16158	44786	36344	42881	39597	1698	1339	1161	1109	25243.6	19114.1	20885.8	17621.2	47670.3	38653	44906.5	41574	402	362	245	1665	0.338698	0.322661
42	YPW3048	TATA.42_TATA.42	DOUBLE	F07	7	F	4	0.162842	0.567704	0.389071	0.515467	68620	57336	65500	60876	68550	57293	65464	60613	68155	56963	65205	58980	27499	23381	27779	25436	38832	32110	35828	32091	1824	1472	1598	1453	30090.5	25481	30080.5	27535.8	41739.8	34444.5	38333.4	34360	395	330	259	1633	0.414572	0.421348
45	YPW3056	TATA.81_TATA.81	DOUBLE	F09	9	F	4	0.215611	0.609982	0.399207	0.567704	69799	55998	61639	59026	69727	55970	61617	58792	69384	55681	61433	57212	30920	26349	30761	30143	36610	27727	29071	25512	1854	1605	1601	1557	33625.9	28736.3	33185.4	32546.2	39472.7	30155.2	31450.2	27785.2	343	289	184	1580	0.457871	0.487259
50	YPW2679	URA3	DOUBLE	F10	10	F	4	0.172722	0.484423	0.311888	0.456999	67425	53169	58419	59793	67321	53124	58383	59558	66900	52786	58137	58219	25284	20712	23878	24953	39903	30684	32854	31879	1713	1390	1405	1387	27678.8	22673	25881.9	26953.6	42692	32919.9	35083	34049.9	421	338	246	1339	0.387869	0.402989
44	YPW3055	m75_m75	DOUBLE	F11	11	F	4	0.199099	0.645573	0.43653	0.677904	68852	64261	57201	60857	68783	64233	57160	60713	68388	63965	56941	59324	33821	33241	31341	33814	32683	28931	23924	23776	1884	1793	1676	1734	36663.3	35995	33976.1	36581.9	35493	31560.4	26332.2	26237	395	268	219	1389	0.508556	0.534662
47	YPW3059	m66_m66	DOUBLE	F12	12	F	4	0.182608	0.585265	0.405974	0.602903	66027	59421	65789	64244	65952	59395	65763	64041	65548	59102	65532	62388	31633	29872	35717	35701	32032	27623	28044	25057	1883	1607	1771	1630	34451.6	32314.6	38487.3	38303.8	34862.4	30002.7	30599.6	27369.8	404	293	231	1653	0.496866	0.519558
41	YPW3047	m63.m89_m63.m89	DOUBLE	G01	1	G	4	0.255335	0.765624	0.498194	0.728797	69267	62204	67447	64786	69224	62177	67415	64585	68810	61862	67211	63352	33586	31240	36621	35924	33338	28991	28795	25721	1886	1631	1795	1707	36418.5	33717.5	39428.1	38639.7	36163.5	31407.6	31385.8	28150.2	414	315	204	1233	0.501853	0.51867
50	YPW2679	URA3	DOUBLE	G02	2	G	4	0.238766	0.649151	0.405974	0.55022	70954	53052	63361	59514	70896	53006	63321	59288	70487	52667	63064	57697	28316	22039	27175	25521	40466	29311	34563	30865	1705	1317	1326	1311	30734.1	23927	29088.9	27428.1	43190.1	31387.4	36636.7	32896.9	409	339	257	1591	0.411677	0.429192
45	YPW3056	TATA.81_TATA.81	DOUBLE	G03	3	G	4	0.232146	0.728797	0.453582	0.649151	69002	55865	65218	60436	68918	55795	65190	60236	68571	55298	64967	58971	33281	27700	34424	31895	33496	26049	28996	25504	1794	1549	1547	1572	35969.1	30047.7	36813.8	34346	36189.9	28349.1	31252.9	27778.9	347	497	223	1265	0.49839	0.515358
39	YPW3043	TATA.26_TATA.26	DOUBLE	G04	4	G	4	0.199099	0.57121	0.321907	0.405974	69014	56459	60902	59273	68933	56423	60866	59000	68573	56040	60623	57265	22798	17477	18697	16836	44128	37302	40798	39412	1647	1261	1128	1017	25036.9	19169.6	20206.8	18185.4	46920.7	39484.1	42759.1	41207	360	383	243	1735	0.340645	0.319046
47	YPW3059	m66_m66	DOUBLE	G05	5	G	4	0.248704	0.787921	0.450167	0.670694	69258	57024	59306	60804	69169	56970	59285	60567	68787	56600	59105	59272	31654	27548	31151	32434	35297	27452	26383	25306	1836	1600	1571	1532	34359.3	29949.4	33575.5	34833.2	38102.4	29850.6	28676.9	27514.6	382	370	180	1295	0.472794	0.500873
42	YPW3048	TATA.42_TATA.42	DOUBLE	G06	6	G	4	0.212307	0.613526	0.368849	0.553711	69354	55121	58958	60833	69280	55072	58923	60602	68961	54599	58692	59264	29338	23373	26700	26976	37840	29725	30556	30877	1783	1501	1436	1411	31906	25539.5	28807.2	29046.4	40635.5	32072.4	32760.1	33042.8	319	473	231	1338	0.43672	0.440186
40	YPW3045	m63.m90_TATA.26	DOUBLE	G07	7	G	4	0.1925	0.606441	0.33194	0.47412	70951	53996	58031	59917	70863	53912	58002	59633	70457	53380	57810	57789	27150	20842	22695	23298	41502	31117	33765	33152	1805	1421	1350	1339	29685	22844.5	24598.4	25198.2	44422.8	33406.1	35938.3	35289.6	406	532	192	1844	0.395473	0.401124
44	YPW3055	m75_m75	DOUBLE	G08	8	G	4	0.252019	0.732461	0.487862	0.699623	68759	64040	64190	61434	68683	63983	64153	61223	68242	63618	63947	59939	33496	32457	35299	34943	32843	29395	26928	23352	1903	1766	1720	1644	36359.9	35150.9	38003.6	37592.5	35688.2	32001.3	29399.1	25668	441	365	206	1284	0.504922	0.524753
46	YPW3058	m75_TATA.81	DOUBLE	G09	9	G	4	0.32525	1.09341	0.948597	1.5786	69317	60147	60527	59149	69219	60111	60499	58985	68706	59889	60276	57507	35035	33873	39966	41971	31946	24405	18697	14050	1725	1611	1613	1486	37663.2	36433	42758.1	44741.2	34494.6	26699.7	20861.6	15965.9	513	222	223	1478	0.523059	0.581231
51	YPW2682	URA3	SINGLE	G10	10	G	4	0.199099	0.588786	0.385696	0.609982	70000	55021	62769	60069	69939	54986	62748	59893	69573	54671	62543	58768	33293	27624	34386	33720	34362	25430	26553	23529	1918	1617	1604	1519	36155	30083.7	36902.7	36148.2	37254.3	27822.7	28861.8	25682.4	366	315	205	1125	0.4921	0.520677
48	YPW3062	TATA.129_TATA.129	DOUBLE	G11	11	G	4	0.195799	0.529335	0.288558	0.50855	67998	53049	59678	60373	67934	53029	59644	60150	67518	52775	59451	58761	28788	23244	27944	28615	36894	28121	30027	28639	1836	1410	1480	1507	31434.9	25295	30137.9	30875.2	39769.2	30306.4	32274.1	30899.8	416	254	193	1389	0.438294	0.452526
38	YPW3041	m63.m90_m63.m90	DOUBLE	G12	12	G	4	0.195799	0.588786	0.348692	0.467265	68297	58536	67129	62397	68217	58475	67079	62194	67723	57882	66822	61005	27053	22114	25552	23000	38824	34258	39707	36534	1846	1510	1563	1471	29669.5	24230.6	27741.9	25054.6	41775.7	36707.7	42244.2	38932	494	593	257	1189	0.410659	0.392287
44	YPW3055	m75_m75	DOUBLE	H01	1	H	4	0.215611	0.739802	0.446754	0.725137	68743	58172	66694	64105	68663	58150	66651	63912	68024	57854	66424	62632	33285	29798	36455	36097	32821	26441	28222	24884	1918	1615	1747	1651	36168.8	32270.2	39194.8	38742.2	35691.3	28816.7	30737.6	27220.4	639	296	227	1280	0.50351	0.529846
47	YPW3059	m66_m66	DOUBLE	H02	2	H	4	0.205701	0.663499	0.443344	0.663499	70398	56775	64979	62207	70305	56717	64951	62000	69805	56173	64721	60678	33652	28493	35122	33767	34294	26123	27965	25392	1859	1557	1634	1519	36431.8	30863	37671.6	36161.8	37091.3	28425.4	30328	27569.6	500	544	230	1322	0.495276	0.521697
46	YPW3058	m75_TATA.81	DOUBLE	H03	3	H	4	0.298548	1.09754	0.890247	1.7055	68429	64616	61971	58603	68329	64592	61941	58476	67761	64329	61728	57349	35184	36887	41631	41680	30881	25815	18529	14141	1696	1627	1568	1528	37785.2	39486.4	44374.2	44519.6	33371.5	28122.5	20620	16114	568	263	213	1127	0.532566	0.588291
51	YPW2682	URA3	SINGLE	H04	4	H	4	0.199099	0.627735	0.405974	0.624177	68929	65795	63529	62844	68891	65746	63479	62670	68413	65422	63239	61458	32220	32254	33588	33707	34370	31488	28057	26157	1823	1680	1594	1594	34925.5	34784.2	36054	36205.7	37134.4	33998	30379.4	28453.1	478	324	240	1212	0.483856	0.506009
48	YPW3062	TATA.129_TATA.129	DOUBLE	H05	5	H	4	0.199099	0.641998	0.389071	0.560701	69400	53484	63390	59909	69337	53460	63355	59705	68896	53159	63132	58362	28878	22595	28794	28170	38196	29059	32850	28688	1822	1505	1488	1504	31492.1	24763.5	30978.6	30419.2	41065.7	31417.4	35132.7	30950.9	441	301	223	1343	0.430539	0.43743
45	YPW3056	TATA.81_TATA.81	DOUBLE	H06	6	H	4	0.222222	0.72148	0.46384	0.714179	66921	57943	64432	61011	66830	57901	64349	60822	66402	57486	64010	59789	30890	27840	33220	31837	33641	27985	29054	26287	1871	1661	1736	1665	33657.4	30329.3	35884.1	34418.2	36488.3	30478.7	31601.8	28708.5	428	415	339	1033	0.478685	0.498701
38	YPW3041	m63.m90_m63.m90	DOUBLE	H07	7	H	4	0.179312	0.581746	0.372215	0.50855	68449	56136	65296	61289	68399	56098	65256	61098	68048	55672	64990	59705	26841	21607	26099	23761	39440	32560	37367	34478	1767	1505	1524	1466	29336.8	23725	28259.8	25835.5	42278	34988.7	39802.8	36827	351	426	266	1393	0.404958	0.398896
50	YPW2679	URA3	DOUBLE	H08	8	H	4	0.215611	0.631296	0.419533	0.599369	70167	55115	64371	60087	70109	55083	64331	59940	69693	54758	64053	58745	26913	22189	26660	24631	40927	31024	35799	32592	1853	1545	1594	1522	29517.3	24387.3	28941.8	26814.6	43922.5	33482.4	38316.6	34989.4	416	325	278	1195	0.396713	0.416985
41	YPW3047	m63.m89_m63.m89	DOUBLE	H09	9	H	4	0.235455	0.692369	0.484423	0.695994	69465	57927	61951	61123	69342	57889	61916	60906	68877	57439	61692	59561	33001	28661	33306	33776	33981	27151	26660	24198	1895	1627	1726	1587	35829.7	31123.8	35996.6	36300.5	36837.5	29569.8	29158.1	26456.6	465	450	224	1345	0.492685	0.513528
42	YPW3048	TATA.42_TATA.42	DOUBLE	H10	10	H	4	0.179312	0.617073	0.389071	0.609982	69169	66733	65138	61252	69052	66681	65091	61069	68556	66270	64769	59856	29257	28361	28870	27078	37400	36128	34140	31164	1899	1781	1759	1614	31995.8	30931	31437.8	29444.2	40372.5	38914.1	36855.4	33643.7	496	411	322	1213	0.438919	0.43978
39	YPW3043	TATA.26_TATA.26	DOUBLE	H11	11	H	4	0.182608	0.567704	0.311888	0.460418	68550	54013	63497	60528	68473	53948	63463	60422	67946	53481	63231	59470	22453	16623	19143	17126	43811	35522	42684	41034	1682	1336	1404	1310	24737.1	18416	21017.1	18859.2	46667.8	37834.5	45136.2	43357.9	527	467	232	952	0.338842	0.318784
43	YPW3051	m63.m89_TATA.42	DOUBLE	H12	12	H	4	0.1925	0.663499	0.43653	0.613526	68122	61057	67104	65639	68051	61008	67051	65523	67529	60539	66793	64569	33081	31209	36769	37334	32505	27548	28198	25460	1943	1782	1826	1775	36004.1	33939.4	39637.6	40183.7	35411	30167.1	30823.5	27967.9	522	469	258	954	0.504391	0.531154
[truncated: 44 more columns]

## Sheet: Dataset 4
ID	STRAIN	MUTATION	CLONE	YFP.CONSTRUCT	DAY	REP	PLATE	ROW	COL	POSITION	BLOCK	STACK	DEPTH	ORDER	FLOW.RUN	BLOCKxROW	COUNTS.INITIAL	COUNTS.GATES	COUNTS.SINGLES	COUNTS.FINAL	FSC.KURTOSIS	WIDTH	FSC.MEDIAN.INITIAL	FSC.MAD.INITIAL	FL1.MEDIAN.INITIAL	FL1.MAD.INITIAL	YFP.MEDIAN.INITIAL	YFP.MAD.INITIAL	YFP.SD.INITIAL	INTERCEPT.INITIAL	SLOPE.INITIAL	THETA	YFP.MEDIAN.ROT	YFP.MAD.ROT	YFP.SD.ROT	FSC.MEDIAN.FINAL	FSC.MAD.FINAL	YFP.MEDIAN.FINAL	YFP.MAD.FINAL	YFP.SD.FINAL	log.YFP.MEDIAN	log.YFP.MAD	log.YFP.SD	log.RNA.MEDIAN	log.RNA.SD	FSC.MEDIAN.CORRECT	log.RNA.MEDIAN.CORRECT	YFP.MEDIAN.CORRECT	log.RNA.SD.CORRECT
58	YPW1893	m89	2	HO	1	1	1	A	2	A02	1	1	1	1	1	1	10796	8512	3458	3246	-0.746729	53	5.72115	0.196898	5.05087	0.212835	0.884429	0.0181976	0.0189489	0.725686	0.0277466	0.0277395	0.883504	0.0177481	0.0183795	5.72139	0.197332	0.825941	0.0458258	0.0462896	-0.191232	0.0552473	0.0560025	-0.17025	0.141923	5.72139	-0.0705752	0.860127	0.143924
3	YPW1980	m131	1	FUSION	1	1	1	A	3	A03	1	1	1	1	1	1	4926	3824	1714	1640	-0.588797	52	5.6745	0.172854	5.34836	0.18692	0.942404	0.0173016	0.0170036	0.871313	0.0125282	0.0125275	0.942175	0.0172642	0.0168945	5.67439	0.172881	1.01583	0.0690036	0.0685499	0.0157056	0.0684967	0.066952	0.288563	0.132836	5.67439	0.388238	1.06992	0.134837
77	YPW1004	REF	2	ANCESTOR	1	1	1	A	4	A04	1	1	1	1	1	1	7365	5669	2123	1995	-0.724347	53	5.72311	0.191789	5.19055	0.210978	0.907022	0.0193148	0.0186432	0.806052	0.0176426	0.0176408	0.906536	0.0188075	0.0184152	5.72303	0.191432	0.890311	0.0573684	0.0558154	-0.116185	0.0646584	0.0625384	0.00986551	0.142923	5.72303	0.109541	0.931243	0.144924
63	YPW1999	m154	2	HO	1	1	1	A	5	A05	1	1	1	1	1	1	12869	9782	4314	3998	-0.810235	53	5.73717	0.209067	5.27675	0.220465	0.921529	0.0175551	0.0180757	0.77702	0.0251882	0.0251829	0.921025	0.0175144	0.0175459	5.73692	0.208949	0.937162	0.0593458	0.0592597	-0.0648995	0.0633895	0.0632593	0.123166	0.135488	5.73692	0.222841	0.983004	0.137489
CTRL	YPW1002	CONTROL	1	PLATE.CONTROL	1	1	1	A	6	A06	1	1	1	1	1	1	7266	5467	2151	1992	-0.741788	53	5.72296	0.192831	5.18571	0.198357	0.907319	0.0184623	0.0179408	0.812205	0.0166197	0.0166181	0.907178	0.0183785	0.0177309	5.72291	0.192939	0.892274	0.0562536	0.0538255	-0.113982	0.0634141	0.0602982	0.0148806	0.137138	5.72291	0.114556	0.933412	0.139139
40	YPW3172	m75.TATA.42	2	FUSION	1	1	1	A	7	A07	1	1	1	1	1	1	2013	1360	623	572	-0.501548	51	5.61029	0.12376	4.46124	0.149262	0.793718	0.0186282	0.0184086	0.634463	0.0283863	0.0283786	0.793624	0.0180228	0.018089	5.61087	0.124595	0.661286	0.0232701	0.0231478	-0.413569	0.0351337	0.0347341	-0.873109	0.143327	5.61087	-0.773434	0.678213	0.145328
72	YPW2651	TATA.129	1	HO	1	1	1	A	8	A08	1	1	1	1	1	1	11670	9003	3891	3609	-0.734409	53	5.72797	0.199254	4.86623	0.218391	0.851438	0.0191338	0.019442	0.643397	0.0363202	0.0363042	0.850427	0.0181087	0.018457	5.7273	0.199419	0.751604	0.0356398	0.0362495	-0.285545	0.0475637	0.0480017	-0.428913	0.143949	5.7273	-0.329237	0.777998	0.14595
7	YPW1970	m160	1	FUSION	1	1	1	A	9	A09	1	1	1	1	1	1	7272	5800	2658	2582	-0.625671	53	5.68715	0.180342	5.40033	0.19256	0.94943	0.0168724	0.0166026	0.881089	0.0120168	0.0120162	0.948743	0.016691	0.0164913	5.68702	0.180643	1.04303	0.0710379	0.0706168	0.0421277	0.0675104	0.067108	0.339926	0.129991	5.68702	0.439601	1.09997	0.131991
53	YPW1898	m75	1	HO	1	1	1	A	10	A10	1	1	1	1	1	1	10944	8384	3563	3323	-0.806122	53	5.73803	0.20408	4.51477	0.249456	0.786334	0.0292399	0.0288545	0.548543	0.0414412	0.0414175	0.785679	0.0283419	0.0279969	5.73768	0.204991	0.651557	0.0331999	0.0335323	-0.428391	0.0511596	0.0508635	-0.935239	0.220935	5.73768	-0.835564	0.667465	0.222936
CTRL	YPW1002	CONTROL	1	PLATE.CONTROL	1	1	1	A	11	A11	1	1	1	1	1	1	10868	8448	3471	3218	-0.776258	53	5.7422	0.199346	5.20792	0.211914	0.906936	0.0179032	0.0182961	0.805629	0.0176426	0.0176408	0.906502	0.0176043	0.0180543	5.74181	0.199553	0.890207	0.0537776	0.0544368	-0.116301	0.0606589	0.0611311	0.0096001	0.13943	5.74181	0.109275	0.931128	0.141431
8	YPW1988	m91	1	FUSION	1	1	1	A	12	A12	1	1	1	1	1	1	7297	5722	2460	2378	-0.73231	53	5.69436	0.19095	5.36011	0.201494	0.941216	0.0165709	0.0167476	0.879341	0.0108661	0.0108657	0.940905	0.0166107	0.0166491	5.69402	0.191207	1.01073	0.0666628	0.0659265	0.0106723	0.0660763	0.0652043	0.278631	0.129028	5.69402	0.378306	1.06428	0.131029
66	YPW1897	m66	1	HO	1	1	1	B	1	B01	1	1	1	1	1	2	13807	10591	4353	4075	-0.891347	53	5.74133	0.220557	4.82473	0.261864	0.841065	0.0260547	0.0263772	0.573724	0.0465644	0.0465308	0.840244	0.0242954	0.0250427	5.74081	0.220811	0.732329	0.0442459	0.0451756	-0.311525	0.0603838	0.0612371	-0.508542	0.194264	5.72909	-0.409897	0.756439	0.196822
43	YPW1949	m142	1	HO	1	1	1	B	2	B02	1	1	1	1	1	2	10771	8465	3400	3179	-0.76108	53	5.71187	0.194491	5.16304	0.209961	0.904267	0.0186187	0.0186272	0.764048	0.0245486	0.0245437	0.90346	0.0181187	0.0181603	5.71188	0.194653	0.881029	0.0542531	0.0531683	-0.126665	0.0616325	0.0604722	-0.0141887	0.139459	5.70016	0.0844564	0.920555	0.142017
CTRL	YPW1002	CONTROL	1	PLATE.CONTROL	1	1	1	B	3	B03	1	1	1	1	1	2	9000	6810	2626	2463	-0.760589	53	5.74379	0.199525	5.19674	0.210653	0.905373	0.0185546	0.0186583	0.790082	0.0200723	0.0200696	0.904811	0.0182859	0.0183642	5.74379	0.199635	0.885078	0.0555613	0.0544912	-0.122079	0.0628929	0.0616236	-0.00362327	0.141427	5.73207	0.0950218	0.925024	0.143984
21	YPW1982	m154	1	FUSION	1	1	1	B	4	B04	1	1	1	1	1	2	9101	7225	2963	2881	-0.719062	53	5.70857	0.193146	5.49278	0.197375	0.96319	0.0155028	0.0154589	0.890213	0.0127839	0.0127832	0.962688	0.015024	0.0153121	5.70856	0.193474	1.10562	0.071785	0.072453	0.100403	0.0646591	0.0653018	0.44897	0.119592	5.69684	0.547615	1.16843	0.12215
73	YPW2653	m75.TATA.42	1	HO	1	1	1	B	5	B05	1	1	1	1	1	2	11824	9192	3449	3248	-0.78488	53	5.73643	0.20201	3.96593	0.255223	0.692752	0.0319245	0.0332481	0.286562	0.0708089	0.0706909	0.690633	0.0288344	0.0310515	5.73608	0.20147	0.57196	0.0164448	0.0171889	-0.558686	0.0287561	0.0298813	-1.6785	0.238145	5.72437	-1.57985	0.579443	0.240703
76	YPW1002	REF	1	ANCESTOR	1	1	1	B	6	B06	1	1	1	1	1	2	13899	10725	4374	4108	-0.800943	54	5.73376	0.200383	5.19641	0.215808	0.906888	0.0173005	0.0178211	0.771266	0.0236533	0.0236489	0.906225	0.0167506	0.017367	5.73355	0.200154	0.88936	0.0511624	0.0520264	-0.117253	0.0575969	0.0586151	0.00742783	0.133546	5.72183	0.106073	0.929749	0.136103
14	YPW1978	m221	1	FUSION	1	1	1	B	7	B07	1	1	1	1	1	2	8354	6778	2951	2882	-0.766336	53	5.70962	0.195756	5.4525	0.210363	0.956027	0.0165906	0.0162594	0.874276	0.0143181	0.0143172	0.955643	0.0163278	0.0160748	5.70927	0.195964	1.07314	0.073159	0.0721136	0.0705911	0.0681643	0.0668852	0.393878	0.125774	5.69755	0.492524	1.13259	0.128331
CTRL	YPW1002	CONTROL	1	PLATE.CONTROL	1	1	1	B	8	B08	1	1	1	1	1	2	9229	7059	2846	2638	-0.775977	53	5.74758	0.204442	5.19589	0.220948	0.9063	0.0193278	0.0194562	0.770351	0.0236533	0.0236489	0.905855	0.0190351	0.0190291	5.747	0.204302	0.888234	0.0580274	0.0570533	-0.11852	0.0651691	0.0642017	0.00453392	0.146873	5.73528	0.103179	0.928507	0.149431
47	YPW1954	m160	1	HO	1	1	1	B	9	B09	1	1	1	1	1	2	14000	10844	4714	4451	-0.755802	53	5.72288	0.19942	5.14432	0.212776	0.900081	0.0181475	0.018356	0.73763	0.0283863	0.0283786	0.89959	0.0177739	0.0177294	5.72267	0.199364	0.869663	0.0511036	0.0508601	-0.139649	0.0589157	0.058372	-0.044454	0.137504	5.71095	0.0541911	0.908011	0.140062
2	YPW978	NULL	1	NULL	1	1	1	B	10	B10	1	1	1	1	1	2	11807	6609	2345	2169	-0.92188	53	5.76989	0.237722	3.20952	0.350948	0.554049	0.0595405	0.0669069	0.727431	-0.0300495	-0.0300405	0.554815	0.0599379	0.0666948	5.76883	0.238895	0.524736	0.0115596	0.0124327	-0.644859	0.022071	0.0233543	-2.7406	0.498224	5.75711	-2.64195	0.527323	0.500782
30	YPW1965	REF	2	FUSION	1	1	1	B	11	B11	1	1	1	1	1	2	9798	7786	3091	2980	-0.747117	53	5.70628	0.191899	5.44152	0.203071	0.953169	0.016058	0.0159738	0.884598	0.0120168	0.0120162	0.952574	0.0158822	0.0158507	5.7064	0.191777	1.05955	0.0700287	0.069956	0.0578396	0.065598	0.0654459	0.369877	0.124974	5.69468	0.468523	1.11758	0.127532
44	YPW1952	m184	1	HO	1	1	1	B	12	B12	1	1	1	1	1	2	13602	10390	4058	3906	-0.797692	53	5.74586	0.208447	4.09771	0.282413	0.711431	0.0405213	0.0415379	0.361375	0.0609231	0.0608479	0.709915	0.0386401	0.0402387	5.74669	0.208802	0.583707	0.0253965	0.0260259	-0.538356	0.0435401	0.0440592	-1.52771	0.310109	5.73497	-1.42907	0.592408	0.312667
10	YPW1986	m76	1	FUSION	1	1	1	C	1	C01	1	1	1	1	1	3	4120	3098	1308	1234	-0.623191	52	5.65681	0.15662	4.6029	0.21397	0.811495	0.0284608	0.0296753	0.70012	0.0196886	0.0196861	0.811238	0.0279564	0.0295403	5.65642	0.15625	0.685136	0.0400817	0.0423355	-0.378138	0.0585862	0.0611965	-0.735369	0.228404	5.65211	-0.647025	0.702256	0.230536
28	YPW1967	m156	2	FUSION	1	1	1	C	2	C02	1	1	1	1	1	3	6440	5299	2172	2126	-0.679042	53	5.69237	0.184739	5.4932	0.198465	0.964493	0.0160627	0.015882	0.914283	0.00882062	0.00882039	0.964157	0.0157259	0.0158178	5.69224	0.184535	1.11262	0.0760016	0.0762627	0.106715	0.0681795	0.0680083	0.46046	0.124443	5.68793	0.548803	1.16922	0.126575
71	YPW2605	TATA.81	1	HO	1	1	1	C	3	C03	1	1	1	1	1	3	11337	8677	3377	3168	-0.755702	54	5.72578	0.201663	4.59805	0.218542	0.803241	0.0191331	0.0196687	0.556425	0.043106	0.0430793	0.801832	0.0182729	0.0182796	5.72573	0.201958	0.671992	0.024518	0.0243816	-0.397508	0.0364112	0.0362015	-0.80892	0.14158	5.72142	-0.720576	0.687898	0.143713
49	YPW1903	m91	2	HO	1	1	1	C	4	C04	1	1	1	1	1	3	12249	9579	4400	4091	-0.870437	53	5.74808	0.224201	5.12906	0.246473	0.894965	0.0198439	0.0202485	0.69208	0.0352962	0.0352816	0.894237	0.0186722	0.0192101	5.74787	0.224442	0.854499	0.0523927	0.052509	-0.15724	0.0608462	0.0614289	-0.0863153	0.148031	5.74356	0.00202825	0.887262	0.150163
CTRL	YPW1002	CONTROL	1	PLATE.CONTROL	1	1	1	C	5	C05	1	1	1	1	1	3	9099	6850	2760	2501	-0.785478	53	5.74879	0.20369	5.21191	0.225558	0.908172	0.0178548	0.018802	0.756017	0.0264673	0.0264612	0.907249	0.0176673	0.0182527	5.74855	0.204296	0.892494	0.0539719	0.0549192	-0.113735	0.0606473	0.0617198	0.0154404	0.139846	5.74424	0.103784	0.928766	0.141978
11	YPW1987	m76	2	FUSION	1	1	1	C	6	C06	1	1	1	1	1	3	2906	2261	1001	972	-0.660641	52	5.68512	0.183818	4.64053	0.232722	0.815601	0.0282373	0.0293709	0.627307	0.0331205	0.0331084	0.815333	0.0281096	0.0288911	5.68561	0.183917	0.691168	0.042284	0.0435045	-0.369373	0.0610719	0.0620147	-0.703345	0.227314	5.6813	-0.615002	0.708845	0.229446
57	YPW1892	m89	1	HO	1	1	1	C	7	C07	1	1	1	1	1	3	8001	6125	2434	2272	-0.808953	53	5.71674	0.200709	5.05866	0.227205	0.885053	0.0198054	0.0202498	0.685469	0.0349122	0.0348981	0.883622	0.0187554	0.0193481	5.7164	0.20007	0.826243	0.0484387	0.048852	-0.190867	0.0584711	0.0590157	-0.169327	0.149641	5.71209	-0.0809831	0.856396	0.151774
24	YPW1924	m63	2	FUSION	1	1	1	C	8	C08	1	1	1	1	1	3	5811	4471	1894	1830	-0.684752	53	5.69718	0.186365	5.29803	0.203326	0.929427	0.0169157	0.0169014	0.824543	0.0184098	0.0184078	0.928676	0.0166936	0.0166264	5.69708	0.185998	0.964131	0.061003	0.0607755	-0.0365283	0.0628445	0.0625126	0.183	0.130883	5.69278	0.271344	1.00702	0.133016
68	YPW1992	m156	2	HO	1	1	1	C	9	C09	1	1	1	1	1	3	9704	7691	3231	3043	-0.873996	53	5.73459	0.2174	5.2865	0.222649	0.922788	0.01695	0.0175543	0.815016	0.0187935	0.0187913	0.922058	0.0166247	0.0172317	5.7339	0.217706	0.940709	0.0575253	0.0587592	-0.0611218	0.0615529	0.0624569	0.131242	0.133263	5.72959	0.219586	0.981434	0.135396
CTRL	YPW1002	CONTROL	1	PLATE.CONTROL	1	1	1	C	10	C10	1	1	1	1	1	3	11570	9101	3570	3355	-0.887933	53	5.77111	0.219008	5.23193	0.225494	0.907945	0.0183637	0.0182955	0.785464	0.0212233	0.0212201	0.90721	0.0177781	0.0179148	5.77029	0.219227	0.892374	0.054801	0.0545137	-0.11387	0.0615969	0.0609906	0.0151357	0.138856	5.76598	0.103479	0.928635	0.140988
25	YPW1927	m66	1	FUSION	1	1	1	C	12	C12	1	1	1	1	1	3	7073	5706	2647	2587	-0.750049	53	5.69708	0.189424	5.17236	0.204132	0.907666	0.0176927	0.0176465	0.799578	0.0205838	0.0205809	0.907149	0.017023	0.0173076	5.69723	0.189559	0.878504	0.0559501	0.0571379	-0.138198	0.0607586	0.0616517	-0.0208332	0.15087	5.69293	0.0675103	0.913484	0.153003
59	YPW1900	m90	1	HO	1	1	1	D	1	D01	1	1	1	1	1	4	13333	10487	4052	3847	-0.762913	53	5.72896	0.202136	5.01291	0.217898	0.875877	0.019588	0.020029	0.724247	0.0264673	0.0264612	0.875175	0.0190411	0.0195224	5.72848	0.201623	0.805375	0.045592	0.0461134	-0.216447	0.0565271	0.0571369	-0.235381	0.150898	5.73047	-0.139668	0.83607	0.14984
CTRL	YPW1002	CONTROL	1	PLATE.CONTROL	1	1	1	D	2	D02	1	1	1	1	1	4	10274	7754	3018	2812	-0.765755	53	5.73839	0.201094	5.20529	0.214768	0.908627	0.0191574	0.0197677	0.797113	0.0194329	0.0194304	0.907674	0.0186587	0.0194947	5.73839	0.201026	0.8938	0.0581386	0.0586361	-0.112274	0.0647858	0.06587	0.0187598	0.148816	5.74038	0.114473	0.933376	0.147758
31	YPW3163	TATA.26	1	FUSION	1	1	1	D	3	D03	1	1	1	1	1	4	3935	2974	1190	1127	-0.608246	52	5.63519	0.141465	4.57534	0.156931	0.811086	0.0176603	0.0172118	0.645972	0.0264673	0.0264612	0.810547	0.0170699	0.0168365	5.63479	0.140783	0.700007	0.0217314	0.0214093	-0.36244	0.0325268	0.0321983	-0.658196	0.106926	5.63678	-0.562483	0.720118	0.105868
74	YPW3016	m156	1	ANCESTOR	1	1	1	D	4	D04	1	1	1	1	1	4	10565	8619	3371	3159	-0.770015	53	5.73212	0.199795	5.27949	0.207042	0.921872	0.0160866	0.0165944	0.825873	0.0167475	0.016746	0.921373	0.0156232	0.0163567	5.732	0.199687	0.938354	0.0541057	0.0557195	-0.0636276	0.0577352	0.0592752	0.125889	0.127048	5.73399	0.221601	0.982406	0.125989
12	YPW1984	m75	1	FUSION	1	1	1	D	5	D05	1	1	1	1	1	4	4565	3489	1598	1559	-0.722841	53	5.6835	0.186383	4.98126	0.212182	0.876199	0.0217347	0.0211797	0.756105	0.0228859	0.0228819	0.875621	0.0212353	0.020831	5.68348	0.186814	0.793806	0.0548196	0.0549599	-0.234023	0.0659822	0.0651621	-0.273976	0.186924	5.68548	-0.178263	0.823338	0.185865
65	YPW1958	m63	2	HO	1	1	1	D	6	D06	1	1	1	1	1	4	9201	7094	2864	2681	-0.790184	53	5.72651	0.198009	4.96866	0.232361	0.867287	0.021461	0.0215485	0.699605	0.0292818	0.0292735	0.866342	0.0207913	0.0209694	5.72633	0.197915	0.784979	0.0467593	0.0463961	-0.242099	0.0593774	0.0588412	-0.304457	0.162681	5.72832	-0.208745	0.813625	0.161623
CTRL	YPW1002	CONTROL	1	PLATE.CONTROL	1	1	1	D	7	D07	1	1	1	1	1	4	8108	6262	2229	2069	-0.80596	53	5.74167	0.20128	5.19664	0.208862	0.90516	0.0200955	0.0196287	0.809736	0.0166197	0.0166181	0.904842	0.0195483	0.0194249	5.74187	0.201228	0.885171	0.0595467	0.0574245	-0.121975	0.0669148	0.0649981	-0.00338339	0.149004	5.74386	0.0923293	0.92388	0.147946
1	YPW1002	CONTROL	1	HO	1	1	1	D	8	D08	1	1	1	1	1	4	8980	6879	2478	2298	-0.841242	53	5.74752	0.217655	5.20386	0.235083	0.906478	0.0174132	0.0180083	0.745533	0.0280025	0.0279951	0.906218	0.0172694	0.0173404	5.74767	0.217253	0.889341	0.0526619	0.0521288	-0.117275	0.0591324	0.0586424	0.00737907	0.133815	5.74966	0.103092	0.928469	0.132757
34	YPW3166	TATA.81	1	FUSION	1	1	1	D	9	D09	1	1	1	1	1	4	4623	3637	1637	1591	-0.607171	52	5.67041	0.171019	4.93787	0.186836	0.870085	0.0172893	0.0171774	0.759168	0.0195607	0.0195583	0.869243	0.0169757	0.0169121	5.67	0.170449	0.791524	0.038287	0.0386818	-0.233795	0.048373	0.0486033	-0.281766	0.132589	5.672	-0.186053	0.820828	0.131531
62	YPW1998	m154	1	HO	1	1	1	D	10	D10	1	1	1	1	1	4	9969	7815	3119	2885	-0.785524	53	5.73527	0.198846	5.26737	0.203379	0.919263	0.0170266	0.0173523	0.832011	0.0152131	0.015212	0.918597	0.0170262	0.0171606	5.73496	0.198898	0.928938	0.0571984	0.0568695	-0.0737135	0.0613674	0.0612661	0.104184	0.132515	5.73696	0.199897	0.972043	0.131457
54	YPW1899	m75	2	HO	1	1	1	D	11	D11	1	1	1	1	1	4	13466	10432	4492	4223	-0.819494	54	5.74902	0.211483	4.62264	0.259846	0.805162	0.028109	0.0278116	0.520521	0.0495113	0.0494709	0.804089	0.0262571	0.026445	5.74841	0.212126	0.675058	0.0357887	0.0357159	-0.392956	0.0529491	0.0525947	-0.791273	0.203769	5.75041	-0.69556	0.692664	0.202711
CTRL	YPW1002	CONTROL	1	PLATE.CONTROL	1	1	1	D	12	D12	1	1	1	1	1	4	8829	6740	2758	2576	-0.766739	53	5.72908	0.200929	5.19472	0.212018	0.908062	0.0188425	0.0189529	0.789403	0.0207117	0.0207087	0.906787	0.018386	0.0186245	5.72892	0.200764	0.891077	0.0564377	0.0560935	-0.115325	0.0632629	0.0630159	0.0118244	0.143354	5.73091	0.107537	0.930379	0.142295
46	YPW2001	m184	3	HO	1	1	1	E	1	E01	2	1	1	1	2	1	13663	10678	4590	4297	-0.785032	54	5.76076	0.201331	5.21342	0.222035	0.905923	0.0185481	0.0189284	0.763031	0.0248044	0.0247994	0.904934	0.0184082	0.0184653	5.76043	0.201279	0.885447	0.0557131	0.0548502	-0.121663	0.0628794	0.0619916	-0.00266666	0.142222	5.73692	0.0910522	0.923339	0.138874
4	YPW1989	m142	1	FUSION	1	1	1	E	2	E02	2	1	1	1	2	1	9228	7436	3099	3031	-0.763547	53	5.71018	0.195732	5.42819	0.212295	0.950512	0.0163161	0.0163923	0.848309	0.0178984	0.0178964	0.949827	0.0158914	0.0161122	5.70992	0.195512	1.04765	0.068617	0.0690263	0.0465516	0.0650533	0.0655861	0.348402	0.12599	5.68641	0.442121	1.10148	0.122642
52	YPW1960	m76	2	HO	1	1	1	E	3	E03	2	1	1	1	2	1	10301	7931	3390	3220	-0.800255	53	5.74308	0.220542	4.08178	0.299818	0.70814	0.0404252	0.0425779	0.288934	0.0729933	0.0728641	0.705863	0.039344	0.0405768	5.74246	0.220313	0.581089	0.0246564	0.0258202	-0.542851	0.0425246	0.0437779	-1.5594	0.317564	5.71895	-1.46568	0.589078	0.314215
CTRL	YPW1002	CONTROL	1	PLATE.CONTROL	1	1	1	E	4	E04	2	1	1	1	2	1	8251	6270	2445	2246	-0.873787	53	5.75771	0.221406	5.21029	0.230355	0.907026	0.0198454	0.0195799	0.776729	0.0226301	0.0226262	0.906707	0.0196621	0.0191702	5.75738	0.221268	0.890831	0.0601288	0.0578346	-0.1156	0.0675656	0.0649071	0.0111979	0.147896	5.73388	0.104917	0.929252	0.144547
67	YPW1991	m156	1	HO	1	1	1	E	5	E05	2	1	1	1	2	1	5633	4336	1699	1584	-0.939276	53	5.74408	0.225807	5.3537	0.302087	0.927159	0.0260196	0.0376438	0.790558	0.0237812	0.0237767	0.926774	0.0257671	0.0374095	5.74403	0.225619	0.957273	0.0896561	0.167079	-0.0436665	0.0949386	0.153022	0.168122	0.365207	5.72052	0.26184	1.00222	0.361859
60	YPW1901	m90	2	HO	1	1	1	E	6	E06	2	1	1	1	2	1	9353	7293	2734	2544	-0.820411	53	5.72674	0.208407	5.00645	0.229938	0.875196	0.0198924	0.0194766	0.700179	0.0305613	0.0305518	0.874268	0.018615	0.0187502	5.72639	0.208669	0.803216	0.0439525	0.0441072	-0.219131	0.0547063	0.0547712	-0.242471	0.14536	5.70288	-0.148753	0.833029	0.142012
16	YPW1974	m89	1	FUSION	1	1	1	E	7	E07	2	1	1	1	2	1	6828	5424	2383	2306	-0.704782	53	5.70298	0.191515	5.35553	0.204376	0.939498	0.0165817	0.0168457	0.84107	0.017259	0.0172573	0.938814	0.0165255	0.0166025	5.70282	0.191189	1.00244	0.0640776	0.065467	0.00244027	0.0644416	0.0648725	0.26228	0.130241	5.67932	0.355999	1.05183	0.126892
18	YPW1976	m90	1	FUSION	1	1	1	E	8	E08	2	1	1	1	2	1	5669	4577	2128	2088	-0.754756	53	5.70195	0.197807	5.32549	0.212592	0.934416	0.0169825	0.0166952	0.818507	0.020328	0.0203252	0.934259	0.0162308	0.0163427	5.70179	0.197792	0.984851	0.0618291	0.0618338	-0.0152649	0.0626942	0.0625679	0.226655	0.127474	5.67828	0.320374	1.03251	0.124126
CTRL	YPW1002	CONTROL	1	PLATE.CONTROL	1	1	1	E	9	E09	2	1	1	1	2	1	8603	6486	2730	2481	-0.809175	54	5.7483	0.208437	5.2029	0.22591	0.907206	0.0194869	0.019519	0.760946	0.025444	0.0254385	0.906495	0.0189797	0.0190334	5.74767	0.207837	0.890185	0.0579455	0.0569647	-0.116326	0.0650966	0.0641615	0.00954362	0.145913	5.72416	0.103263	0.928543	0.142564
6	YPW1969	m184	2	FUSION	1	1	1	E	10	E10	2	1	1	1	2	1	9044	7208	3270	3168	-0.840074	53	5.7162	0.204679	5.46878	0.213539	0.957821	0.016417	0.0162198	0.886207	0.0125282	0.0125275	0.957371	0.0163117	0.016069	5.71608	0.20474	1.08094	0.0745868	0.0727274	0.0778341	0.0686945	0.0671257	0.407392	0.125141	5.69258	0.501111	1.13804	0.121793
27	YPW1966	m156	1	FUSION	1	1	1	E	11	E11	2	1	1	1	2	1	7797	6175	2637	2570	-0.706998	53	5.70108	0.18607	5.50031	0.189154	0.965384	0.0150719	0.0153102	0.933317	0.00562466	0.0056246	0.965236	0.0150601	0.0152814	5.70104	0.185933	1.11781	0.0733701	0.0734503	0.111372	0.0653252	0.0656353	0.468899	0.118846	5.67753	0.562618	1.17853	0.115498
50	YPW1961	V	1	HO	1	1	1	E	12	E12	2	1	1	1	2	1	12912	10245	4102	3882	-0.837829	53	5.74204	0.210419	5.30969	0.223005	0.926493	0.0173428	0.0178295	0.802425	0.0216069	0.0216036	0.92591	0.0167758	0.017435	5.74178	0.210265	0.954194	0.0600423	0.0610721	-0.0468886	0.062916	0.0640968	0.161367	0.134398	5.71827	0.255086	0.99884	0.13105
CTRL	YPW1002	CONTROL	1	PLATE.CONTROL	1	1	1	F	1	F01	2	1	1	1	2	2	9937	7642	2947	2732	-0.784292	53	5.74559	0.207825	5.20789	0.222516	0.908095	0.0183445	0.0190784	0.778807	0.0225022	0.0224984	0.907587	0.0177007	0.0186765	5.74542	0.207736	0.893532	0.055078	0.056743	-0.112573	0.0613761	0.0634788	0.0180801	0.144109	5.73588	0.11057	0.931687	0.143233
26	YPW1928	m66	2	FUSION	1	1	1	F	2	F02	2	1	1	1	2	2	7301	5810	2548	2460	-0.719679	52	5.67174	0.176105	5.1484	0.194474	0.90667	0.0183503	0.0181418	0.820137	0.0168754	0.0168738	0.905806	0.0177258	0.017937	5.67186	0.176255	0.874098	0.0581056	0.0587058	-0.142991	0.0634407	0.0635485	-0.032535	0.156835	5.66232	0.0599552	0.91037	0.155958
55	YPW1956	m221	1	HO	1	1	1	F	3	F03	2	1	1	1	2	2	11985	9388	3759	3517	-0.809842	54	5.74265	0.210599	5.23162	0.224603	0.912072	0.0169605	0.0176229	0.798272	0.0198165	0.0198139	0.911373	0.0168748	0.0172723	5.74265	0.210637	0.905363	0.0535114	0.0540901	-0.0994189	0.0592866	0.0597692	0.0476853	0.133364	5.73311	0.140175	0.944665	0.132488
2	YPW978	NULL	1	NULL	1	1	1	F	4	F04	2	1	1	1	2	2	12586	6770	2570	2442	-0.840289	54	5.76225	0.230899	3.21299	0.366888	0.557491	0.0615513	0.066962	0.802927	-0.0425937	-0.042568	0.557436	0.0626159	0.0665376	5.76283	0.232011	0.525253	0.0124789	0.0124047	-0.643875	0.0237285	0.023357	-2.7201	0.487016	5.7533	-2.62761	0.527721	0.486139
56	YPW1894	m123	1	HO	1	1	1	F	5	F05	2	1	1	1	2	2	13284	10161	4335	4069	-0.856828	53	5.74379	0.220964	5.18189	0.236222	0.905241	0.0188394	0.0190721	0.730438	0.0304333	0.030424	0.904408	0.0183244	0.0182799	5.74346	0.220952	0.883865	0.0555844	0.0541297	-0.12345	0.0623942	0.0612659	-0.00677637	0.140932	5.73392	0.0857138	0.921084	0.140056
CTRL	YPW1002	CONTROL	1	PLATE.CONTROL	1	1	1	F	6	F06	2	1	1	1	2	2	7462	5669	2146	1974	-0.80804	53	5.73785	0.200241	5.19313	0.210658	0.905169	0.0188241	0.0192167	0.806139	0.017259	0.0172573	0.904358	0.0186853	0.0189967	5.73789	0.200456	0.883715	0.0561211	0.0564183	-0.123621	0.0635321	0.0637241	-0.00716873	0.146948	5.72836	0.0853214	0.920919	0.146072
69	YPW1993	REF	1	HO	1	1	1	F	7	F07	2	1	1	1	2	2	12891	10066	4034	3755	-0.786983	54	5.74921	0.206248	5.3173	0.225855	0.926417	0.0173854	0.0179325	0.798518	0.0222464	0.0222427	0.925728	0.0169433	0.0175198	5.74916	0.206245	0.953546	0.0600351	0.0614095	-0.0475677	0.0625414	0.0644244	0.159941	0.135334	5.73962	0.252431	0.997517	0.134457
64	YPW1896	m63	1	HO	1	1	1	F	8	F08	2	1	1	1	2	2	9869	7593	3165	2963	-0.831118	53	5.75287	0.215152	4.97545	0.23951	0.866922	0.0224581	0.022132	0.660922	0.0358082	0.0357929	0.866737	0.0214036	0.0212269	5.7531	0.215104	0.785862	0.0477785	0.0475289	-0.240974	0.0605096	0.0600297	-0.301365	0.166139	5.74356	-0.208875	0.813584	0.165262
29	YPW1964	REF	1	FUSION	1	1	1	F	9	F09	2	1	1	1	2	2	7488	5885	2305	2194	-0.640097	52	5.66998	0.174923	5.36735	0.187654	0.945708	0.0177525	0.0170979	0.900045	0.00805357	0.0080534	0.945361	0.0171232	0.0170531	5.66999	0.174811	1.02885	0.0709519	0.0702557	0.028439	0.0687034	0.068089	0.313476	0.132792	5.66045	0.405966	1.08011	0.131915
23	YPW1923	m63	1	FUSION	1	1	1	F	10	F10	2	1	1	1	2	2	8137	6529	2855	2755	-0.767819	52	5.68828	0.190861	5.28283	0.21052	0.928585	0.0175629	0.0171963	0.804951	0.0217348	0.0217314	0.927676	0.0174381	0.0168003	5.68829	0.191065	0.960514	0.0626222	0.0606465	-0.0402872	0.0654746	0.0627769	0.175179	0.131631	5.67875	0.26767	1.00516	0.130754
CTRL	YPW1002	CONTROL	1	PLATE.CONTROL	1	1	1	F	11	F11	2	1	1	1	2	2	8688	6663	2633	2471	-0.921065	54	5.76328	0.225032	5.2328	0.22143	0.909666	0.0184408	0.0181749	0.80725	0.0177705	0.0177686	0.909538	0.0179462	0.0179013	5.7632	0.224848	0.899585	0.0556863	0.0556317	-0.105821	0.0628749	0.0616657	0.0333363	0.139148	5.75366	0.125826	0.938327	0.138271
37	YPW3169	TATA.129	1	FUSION	1	1	1	F	12	F12	2	1	1	1	2	2	7997	6404	2803	2717	-0.693446	52	5.68441	0.186898	5.1986	0.195628	0.913003	0.0159165	0.0161559	0.819257	0.0164918	0.0164903	0.912174	0.0159764	0.0159299	5.68459	0.186833	0.907913	0.0506275	0.0511432	-0.0966063	0.0560134	0.0559284	0.0539531	0.125311	5.67505	0.146443	0.947462	0.124434
22	YPW1983	m154	2	FUSION	1	1	1	G	1	G01	2	1	1	1	2	3	8194	6431	2738	2649	-0.721536	53	5.69776	0.195538	5.48126	0.207639	0.962229	0.0158967	0.0160812	0.879919	0.014446	0.014445	0.961682	0.0158877	0.0158932	5.69761	0.195363	1.10087	0.0748406	0.0748263	0.096101	0.0682494	0.0676073	0.441106	0.124485	5.68372	0.534239	1.15954	0.122734
13	YPW1985	m75	2	FUSION	1	1	1	G	2	G02	2	1	1	1	2	3	5170	4077	1933	1884	-0.714311	53	5.69527	0.194747	4.99152	0.205054	0.876252	0.0204153	0.019907	0.765358	0.0212233	0.0212201	0.875407	0.0200822	0.0195867	5.69479	0.194465	0.793252	0.0521153	0.0508722	-0.23469	0.0627097	0.0607603	-0.275862	0.173347	5.6809	-0.182729	0.821897	0.171597
CTRL	YPW1002	CONTROL	1	PLATE.CONTROL	1	1	1	G	3	G03	2	1	1	1	2	3	7142	5288	2066	1868	-0.756105	54	5.74713	0.207415	5.20816	0.228314	0.908207	0.0195015	0.0189656	0.785499	0.0213511	0.0213479	0.907614	0.0185162	0.0185896	5.74659	0.207916	0.893616	0.057061	0.056137	-0.112479	0.0638188	0.0629774	0.018294	0.14254	5.73271	0.111427	0.932057	0.140789
39	YPW3171	m75.TATA.42	1	FUSION	1	1	1	G	4	G04	2	1	1	1	2	3	5391	4313	2011	1936	-0.63651	53	5.68285	0.184248	4.51462	0.201977	0.793643	0.0203044	0.0205812	0.61924	0.0306892	0.0306796	0.793089	0.0196257	0.0199644	5.68309	0.183986	0.660612	0.0248015	0.0249251	-0.414589	0.037413	0.0375969	-0.877292	0.154979	5.6692	-0.784159	0.67631	0.153228
70	YPW2550	TATA.26	1	HO	1	1	1	G	5	G05	2	1	1	1	2	3	13106	10267	4092	3884	-0.741128	53	5.72155	0.194713	4.19917	0.211207	0.734036	0.0212943	0.0218578	0.462485	0.0474612	0.0474256	0.732913	0.0202401	0.0203922	5.72049	0.1948	0.600243	0.0159624	0.0156923	-0.510421	0.0264423	0.0261241	-1.34787	0.156203	5.7066	-1.25473	0.610049	0.154452
5	YPW1968	m184	1	FUSION	1	1	1	G	6	G06	2	1	1	1	2	3	7457	5809	2622	2503	-0.775042	53	5.70593	0.196267	5.47348	0.204166	0.958472	0.0165574	0.0159969	0.91106	0.00830925	0.00830906	0.958248	0.0163983	0.0159348	5.70585	0.196317	1.08494	0.0749793	0.0728259	0.081529	0.0688211	0.0668885	0.414254	0.124454	5.69196	0.507387	1.14206	0.122704
38	YPW3170	TATA.129	2	FUSION	1	1	1	G	7	G07	2	1	1	1	2	3	5567	4408	1779	1711	-0.781918	53	5.69398	0.188876	5.19352	0.188712	0.911341	0.0165343	0.0169637	0.88077	0.00536898	0.00536893	0.91124	0.0162584	0.0169401	5.69393	0.188752	0.904942	0.0513211	0.0536158	-0.0998841	0.0565373	0.0589602	0.0466466	0.132332	5.68004	0.139779	0.944489	0.130582
CTRL	YPW1002	CONTROL	1	PLATE.CONTROL	1	1	1	G	8	G08	2	1	1	1	2	3	8050	6204	2403	2209	-0.859825	53	5.75952	0.22057	5.20366	0.23291	0.906165	0.0199367	0.0200433	0.756673	0.0259557	0.0259498	0.905455	0.019435	0.01949	5.75922	0.22013	0.887022	0.0597286	0.0582195	-0.119885	0.0670051	0.0655869	0.00140936	0.150345	5.74533	0.0945422	0.92482	0.148594
48	YPW1902	m91	1	HO	1	1	1	G	9	G09	2	1	1	1	2	3	12065	9321	3766	3503	-0.794605	53	5.72996	0.20756	5.10473	0.232236	0.892126	0.0197115	0.0197105	0.711146	0.0315849	0.0315744	0.891498	0.0184137	0.0189367	5.72953	0.207741	0.846982	0.0501669	0.0505314	-0.166075	0.0589869	0.0597211	-0.107734	0.14554	5.71564	-0.0146009	0.880872	0.143789
20	YPW1972	m153	1	FUSION	1	1	1	G	10	G10	2	1	1	1	2	3	9956	7963	3254	3159	-0.762865	53	5.7072	0.186366	5.5041	0.189388	0.963484	0.0157247	0.0154933	0.927005	0.00639167	0.00639159	0.963407	0.0156612	0.0154586	5.70733	0.186239	1.10903	0.0745328	0.0733791	0.103488	0.0674708	0.0660226	0.454593	0.120442	5.69344	0.547726	1.1685	0.118691
9	YPW2002	V	1	FUSION	1	1	1	G	11	G11	2	1	1	1	2	3	13301	10564	4415	4171	-0.821194	53	5.73937	0.209421	5.29074	0.220318	0.923269	0.0172463	0.0177736	0.80146	0.0212233	0.0212201	0.92281	0.0171476	0.017397	5.73914	0.209441	0.94331	0.0592161	0.0597187	-0.05836	0.0628897	0.0632654	0.137126	0.134645	5.72525	0.230258	0.986602	0.132894
75	YPW1141	m156	2	ANCESTOR	1	1	1	G	12	G12	2	1	1	1	2	3	7821	5937	2339	2144	-0.813125	53	5.73882	0.20241	5.26644	0.216608	0.920745	0.0188902	0.0189588	0.814361	0.0185377	0.0185356	0.920298	0.0186561	0.0186951	5.73875	0.202721	0.934684	0.0639388	0.0622455	-0.0675463	0.0682391	0.0668641	0.117486	0.143125	5.72486	0.210618	0.977134	0.141375
35	YPW3167	TATA.81	2	FUSION	1	1	1	H	2	H02	2	1	1	1	2	4	5145	4063	1907	1849	-0.682128	53	5.68615	0.195818	4.96105	0.189138	0.871741	0.0179679	0.0174245	0.807774	0.0112497	0.0112492	0.87155	0.0180135	0.0173232	5.68605	0.195279	0.796834	0.0417872	0.0404392	-0.227109	0.0521907	0.0504196	-0.263729	0.136135	5.67312	-0.173347	0.824933	0.133629
19	YPW1977	m90	2	FUSION	1	1	1	H	3	H03	2	1	1	1	2	4	6580	5175	2181	2115	-0.761551	52	5.68358	0.193901	5.31495	0.195144	0.934732	0.0169912	0.0169451	0.858441	0.0134231	0.0134223	0.934362	0.0168394	0.0167916	5.68323	0.193324	0.985242	0.0639571	0.0640967	-0.0148676	0.0652533	0.0645612	0.227462	0.132033	5.6703	0.317843	1.03116	0.129527
45	YPW2000	m184	2	HO	1	1	1	H	4	H04	2	1	1	1	2	4	9135	7132	2914	2725	-0.824	53	5.72176	0.206486	5.24068	0.216682	0.915819	0.0191172	0.0186509	0.794385	0.0212233	0.0212201	0.91492	0.0184203	0.0182734	5.72157	0.206832	0.916773	0.0603969	0.0592539	-0.0868958	0.0654698	0.0644326	0.0754276	0.142099	5.70864	0.165809	0.956216	0.139593
CTRL	YPW1002	CONTROL	1	PLATE.CONTROL	1	1	1	H	5	H05	2	1	1	1	2	4	9262	6999	2909	2672	-0.83368	54	5.75816	0.211581	5.21904	0.225126	0.908286	0.0194171	0.0198232	0.789761	0.0205838	0.0205809	0.907625	0.019834	0.0194955	5.75799	0.211141	0.893648	0.0603514	0.0590871	-0.112443	0.0681019	0.0661591	0.0183754	0.150018	5.74505	0.108757	0.930905	0.147512
42	YPW1895	m131	1	HO	1	1	1	H	6	H06	2	1	1	1	2	4	11648	8972	3621	3395	-0.80822	53	5.72358	0.202165	5.13355	0.231985	0.898432	0.0229636	0.0233119	0.73889	0.0278745	0.0278673	0.897524	0.0221698	0.0228126	5.72364	0.202448	0.863735	0.0639032	0.062718	-0.14649	0.0735455	0.0730471	-0.0606121	0.172325	5.71071	0.0297692	0.898162	0.169819
61	YPW1996	m153	1	HO	1	1	1	H	7	H07	2	1	1	1	2	4	11291	8532	3212	2955	-0.807294	53	5.74056	0.216373	5.26184	0.219471	0.918494	0.0173673	0.0180408	0.81428	0.0181541	0.0181521	0.918123	0.0172265	0.0177485	5.74043	0.216026	0.927347	0.0579567	0.0586412	-0.0754276	0.0622717	0.0632286	0.10047	0.137152	5.7275	0.190851	0.967791	0.134645
15	YPW1962	m123	1	FUSION	1	1	1	H	8	H08	2	1	1	1	2	4	8091	6303	2697	2606	-0.663214	53	5.69732	0.182611	5.43011	0.192191	0.953082	0.0160166	0.0159447	0.901372	0.0090763	0.00907605	0.95282	0.015748	0.0158782	5.69729	0.182462	1.06063	0.0689252	0.0695648	0.058859	0.0649966	0.0653356	0.371806	0.124036	5.68436	0.462188	1.11368	0.12153
51	YPW1953	m76	1	HO	1	1	1	H	9	H09	2	1	1	1	2	4	13046	10406	4249	4037	-0.84927	53	5.74178	0.213893	5.23324	0.234913	0.912956	0.0180984	0.0185428	0.770534	0.0248044	0.0247994	0.912467	0.0175128	0.0180204	5.74164	0.214429	0.908851	0.0560459	0.0570128	-0.0955743	0.0616514	0.0626686	0.0562472	0.139372	5.7287	0.146629	0.947545	0.136866
CTRL	YPW1002	CONTROL	1	PLATE.CONTROL	1	1	1	H	10	H10	2	1	1	1	2	4	11770	9285	3780	3594	-0.85219	54	5.76104	0.207743	5.22386	0.216088	0.908232	0.0190374	0.019041	0.766069	0.0246765	0.0246715	0.907655	0.0187214	0.0185473	5.76106	0.207813	0.893742	0.0576138	0.0563264	-0.112339	0.0647605	0.0630517	0.0186122	0.142975	5.74813	0.108994	0.931007	0.140469
32	YPW3164	TATA.26	2	FUSION	1	1	1	H	11	H11	2	1	1	1	2	4	4960	3905	1813	1713	-0.666114	52	5.66702	0.178335	4.6022	0.184117	0.811902	0.0182629	0.0178398	0.647396	0.0262115	0.0262055	0.810977	0.0180177	0.0173462	5.66651	0.178525	0.700555	0.02304	0.0220671	-0.361613	0.0347217	0.0331813	-0.655462	0.109911	5.65357	-0.56508	0.719546	0.107404
17	YPW1975	m89	2	FUSION	1	1	1	H	12	H12	2	1	1	1	2	4	9639	7685	3182	3066	-0.738275	53	5.69109	0.19234	5.33762	0.20435	0.937885	0.016923	0.0164309	0.860037	0.0136788	0.013678	0.937518	0.0167242	0.0162718	5.69094	0.192448	0.997372	0.0645251	0.0633727	-0.00263139	0.0652748	0.0632176	0.252141	0.127359	5.67801	0.342522	1.04444	0.124853
58	YPW1893	m89	2	HO	1	2	2	A	2	A02	1	1	1	1	3	1	15602	12241	5387	5047	-0.765332	53	5.72252	0.197483	5.06422	0.219916	0.885821	0.0196115	0.0194996	0.711665	0.0304333	0.030424	0.884917	0.0189445	0.0188288	5.72251	0.197617	0.829566	0.0489768	0.047941	-0.186852	0.0590198	0.0577469	-0.159197	0.145371	5.71559	-0.0845711	0.855118	0.146011
3	YPW1980	m131	1	FUSION	1	2	2	A	3	A03	1	1	1	1	3	1	8864	6876	3033	2931	-0.66709	52	5.67898	0.174214	5.36066	0.186545	0.943246	0.0165446	0.0163144	0.880085	0.0111218	0.0111214	0.943053	0.0163807	0.0162175	5.67887	0.174311	1.01938	0.0667636	0.0659013	0.0191972	0.0657127	0.0643428	0.295425	0.126831	5.67194	0.37005	1.05964	0.127471
77	YPW1004	REF	2	ANCESTOR	1	2	2	A	4	A04	1	1	1	1	3	1	10014	7467	3181	2890	-0.796139	53	5.74094	0.200262	5.20867	0.22021	0.909007	0.0202451	0.0202006	0.755591	0.0267232	0.0267168	0.908013	0.0195282	0.0196889	5.74047	0.199931	0.894848	0.0605005	0.0602725	-0.111102	0.0670432	0.0671694	0.0214161	0.152563	5.73354	0.0960419	0.925458	0.153203
63	YPW1999	m154	2	HO	1	2	2	A	5	A05	1	1	1	1	3	1	15940	12625	5465	5128	-0.789433	52	5.71215	0.194607	5.26992	0.203589	0.923816	0.0180696	0.0179201	0.802585	0.0212233	0.0212201	0.923026	0.0178696	0.0175605	5.71201	0.194774	0.94406	0.0621533	0.0600792	-0.0575658	0.066078	0.0637584	0.138814	0.135229	5.70508	0.21344	0.978483	0.135869
CTRL	YPW1002	CONTROL	1	PLATE.CONTROL	1	2	2	A	6	A06	1	1	1	1	3	1	8768	6717	2668	2482	-0.746894	53	5.74641	0.20192	5.21089	0.209694	0.908824	0.019217	0.0197489	0.79642	0.0195607	0.0195583	0.908379	0.0191671	0.0194762	5.74655	0.202301	0.895979	0.0587676	0.0594083	-0.109839	0.0661919	0.0663383	0.0242743	0.149947	5.73963	0.0989	0.926676	0.150587
40	YPW3172	m75.TATA.42	2	FUSION	1	2	2	A	7	A07	1	1	1	1	3	1	2709	1930	977	916	-0.391973	51	5.60446	0.132572	4.48266	0.171935	0.799357	0.018219	0.018559	0.66751	0.0235254	0.023521	0.798046	0.0177477	0.0182958	5.6045	0.132433	0.666968	0.0233929	0.0240389	-0.405013	0.0349437	0.0358278	-0.838531	0.143786	5.59757	-0.763905	0.679922	0.144426
72	YPW2651	TATA.129	1	HO	1	2	2	A	8	A08	1	1	1	1	3	1	14529	11669	5116	4864	-0.81883	53	5.72871	0.204358	4.87945	0.222595	0.853333	0.0202258	0.0202319	0.626198	0.0396486	0.0396278	0.852375	0.0194483	0.0190979	5.72826	0.204059	0.755471	0.0386775	0.0376657	-0.280413	0.0514436	0.0498034	-0.413673	0.147311	5.72133	-0.339047	0.775282	0.147951
7	YPW1970	m160	1	FUSION	1	2	2	A	9	A09	1	1	1	1	3	1	10319	8274	3884	3698	-0.672691	52	5.68432	0.18114	5.42261	0.194905	0.952595	0.0169866	0.0165077	0.866846	0.0150853	0.0150841	0.95222	0.0167121	0.0163285	5.68418	0.181147	1.058	0.0720551	0.0715003	0.0563781	0.0687232	0.0671737	0.367109	0.128087	5.67726	0.441735	1.10125	0.128727
53	YPW1898	m75	1	HO	1	2	2	A	10	A10	1	1	1	1	3	1	14385	11349	4440	4180	-0.690221	53	5.71473	0.174971	4.50557	0.228475	0.787658	0.0281383	0.0280529	0.573514	0.0374722	0.0374547	0.786897	0.0277622	0.0274812	5.71483	0.175407	0.65301	0.0329381	0.0329323	-0.426163	0.0506776	0.0499449	-0.925711	0.214924	5.70791	-0.851085	0.664882	0.215564
CTRL	YPW1002	CONTROL	1	PLATE.CONTROL	1	2	2	A	11	A11	1	1	1	1	3	1	12594	9546	3419	3158	-0.763717	53	5.74424	0.192175	5.21037	0.199949	0.907103	0.0178379	0.0181668	0.80429	0.0178984	0.0178964	0.906488	0.0179521	0.0179382	5.74402	0.191701	0.890162	0.0542885	0.0539377	-0.116352	0.0612527	0.0606568	0.00948508	0.138167	5.7371	0.0841109	0.920409	0.138807
8	YPW1988	m91	1	FUSION	1	2	2	A	12	A12	1	1	1	1	3	1	10950	8508	3926	3830	-0.663627	52	5.67987	0.174526	5.37421	0.184299	0.945453	0.0163085	0.0159196	0.889544	0.00984336	0.00984304	0.945296	0.0161617	0.0158479	5.67977	0.174599	1.02858	0.066943	0.0654083	0.0281788	0.0651603	0.0633792	0.31297	0.123693	5.67284	0.387595	1.06955	0.124333
66	YPW1897	m66	1	HO	1	2	2	B	1	B01	1	1	1	1	3	2	13576	10589	4301	4024	-0.775833	53	5.73398	0.200096	4.82321	0.23502	0.841893	0.0264194	0.0261426	0.623358	0.0381123	0.0380939	0.841209	0.0255812	0.0253836	5.733	0.200633	0.734091	0.046505	0.0460558	-0.309122	0.0636851	0.0623211	-0.500994	0.19656	5.71435	-0.427399	0.751986	0.197757
43	YPW1949	m142	1	HO	1	2	2	B	2	B02	1	1	1	1	3	2	15067	11683	4809	4499	-0.822661	53	5.72795	0.198667	5.19497	0.222366	0.90737	0.0179534	0.0182779	0.744042	0.0285142	0.0285065	0.906324	0.0172144	0.0176355	5.72781	0.198548	0.889664	0.0523498	0.0531218	-0.116911	0.0586208	0.059687	0.00820852	0.136251	5.70917	0.0818041	0.91944	0.137448
CTRL	YPW1002	CONTROL	1	PLATE.CONTROL	1	2	2	B	3	B03	1	1	1	1	3	2	9687	7623	3094	2912	-0.83419	53	5.74681	0.202644	5.21864	0.215977	0.908788	0.018168	0.0185602	0.794906	0.0198165	0.0198139	0.907766	0.0178823	0.0182549	5.74679	0.202903	0.894086	0.0548665	0.0553274	-0.111954	0.0615025	0.0619914	0.0194855	0.140317	5.72814	0.0930811	0.924199	0.141514
21	YPW1982	m154	1	FUSION	1	2	2	B	4	B04	1	1	1	1	3	2	12268	9898	4435	4318	-0.72595	53	5.70822	0.185784	5.50494	0.192476	0.964978	0.0157658	0.0159762	0.931412	0.00588033	0.00588026	0.964666	0.0158622	0.0159487	5.70814	0.185754	1.11506	0.0762347	0.076559	0.108911	0.0682449	0.0684537	0.464443	0.124429	5.68949	0.538039	1.16205	0.125626
73	YPW2653	m75.TATA.42	1	HO	1	2	2	B	5	B05	1	1	1	1	3	2	14935	11041	4816	4527	-0.79662	53	5.73554	0.206844	4.00698	0.265283	0.699099	0.0325064	0.0344188	0.249473	0.078393	0.078233	0.696216	0.0303644	0.0317451	5.73434	0.206283	0.575181	0.0179238	0.0182173	-0.55307	0.0311772	0.0315068	-1.63484	0.241612	5.7157	-1.56124	0.58094	0.242809
76	YPW1002	REF	1	ANCESTOR	1	2	2	B	6	B06	1	1	1	1	3	2	11971	9453	3840	3594	-0.746051	53	5.72306	0.18873	5.19194	0.206736	0.907935	0.0186172	0.018696	0.768174	0.0244207	0.0244159	0.906965	0.0180777	0.0182849	5.72302	0.188529	0.891621	0.0554397	0.0553841	-0.114714	0.0620541	0.0620727	0.0132155	0.141344	5.70437	0.0868111	0.921547	0.142541
14	YPW1978	m221	1	FUSION	1	2	2	B	7	B07	1	1	1	1	3	2	12011	9571	4157	4066	-0.641019	53	5.70051	0.176614	5.46531	0.185266	0.958104	0.0163267	0.0160275	0.92094	0.00651951	0.00651942	0.958093	0.0163117	0.0159958	5.70033	0.176632	1.08423	0.0738569	0.0726525	0.080872	0.0685835	0.0669441	0.413035	0.124309	5.68169	0.486631	1.12887	0.125506
CTRL	YPW1002	CONTROL	1	PLATE.CONTROL	1	2	2	B	8	B08	1	1	1	1	3	2	9637	7453	2850	2673	-0.845504	53	5.75693	0.212503	5.22693	0.22659	0.909696	0.0191552	0.0192896	0.801504	0.0187935	0.0187913	0.909193	0.0192494	0.019023	5.75689	0.212351	0.898509	0.0600429	0.0588899	-0.107019	0.0666956	0.0653402	0.0306402	0.147695	5.73824	0.104236	0.92896	0.148892
47	YPW1954	m160	1	HO	1	2	2	B	9	B09	1	1	1	1	3	2	12874	9909	4179	3876	-0.794099	53	5.71634	0.200206	5.16532	0.2236	0.903942	0.0184369	0.0189094	0.732169	0.0300495	0.0300405	0.903454	0.0176974	0.0182012	5.71649	0.200086	0.881011	0.053021	0.0532275	-0.126685	0.0601093	0.0605697	-0.0142348	0.139621	5.69785	0.0593608	0.910126	0.140818
2	YPW978	NULL	1	NULL	1	2	2	B	10	B10	1	1	1	1	3	2	14301	7905	2882	2763	-0.848905	54	5.76189	0.216507	3.2003	0.348561	0.554255	0.0580326	0.0662645	0.717077	-0.0282583	-0.0282508	0.555787	0.058167	0.0660998	5.76184	0.21655	0.524927	0.0115411	0.012678	-0.644497	0.021959	0.0237579	-2.733	0.504205	5.74319	-2.6594	0.526847	0.505402
30	YPW1965	REF	2	FUSION	1	2	2	B	11	B11	1	1	1	1	3	2	12458	9914	4217	4092	-0.684871	52	5.70326	0.188543	5.46034	0.194658	0.957178	0.015304	0.0150963	0.885726	0.0125282	0.0125275	0.956884	0.0153748	0.0149646	5.7034	0.188935	1.07874	0.0698548	0.0678068	0.07579	0.0646433	0.0625896	0.403587	0.11712	5.68476	0.477183	1.12295	0.118317
44	YPW1952	m184	1	HO	1	2	2	B	12	B12	1	1	1	1	3	2	12248	9179	3730	3566	-0.686106	53	5.70286	0.17769	4.07105	0.286256	0.712351	0.0411591	0.04307	0.292416	0.0736359	0.0735032	0.710256	0.0397387	0.0415811	5.70277	0.177459	0.583931	0.0256375	0.0268741	-0.537973	0.0439828	0.0454325	-1.52505	0.319364	5.68412	-1.45145	0.590357	0.320561
10	YPW1986	m76	1	FUSION	1	2	2	C	1	C01	1	1	1	1	3	3	8257	6761	3162	3074	-0.630573	52	5.66523	0.164228	4.62801	0.220073	0.814841	0.0293852	0.029612	0.637355	0.031329	0.0313188	0.814193	0.0290401	0.0292461	5.66478	0.164288	0.689469	0.0432281	0.0433542	-0.371833	0.0627764	0.0621452	-0.712261	0.228556	5.65355	-0.648966	0.701863	0.229328
28	YPW1967	m156	2	FUSION	1	2	2	C	2	C02	1	1	1	1	3	3	8593	6884	2968	2894	-0.764462	52	5.69872	0.18662	5.52359	0.195012	0.969041	0.0161831	0.0158671	0.923874	0.00792573	0.00792557	0.968776	0.0159385	0.0158159	5.6986	0.18645	1.13516	0.0800877	0.0783711	0.126772	0.0703884	0.0688558	0.496581	0.123346	5.68737	0.559875	1.17667	0.124118
71	YPW2605	TATA.81	1	HO	1	2	2	C	3	C03	1	1	1	1	3	3	14726	11042	4537	4187	-0.786462	53	5.73475	0.206031	4.60279	0.221511	0.804627	0.0200669	0.0204979	0.532449	0.0474612	0.0474256	0.803877	0.0184827	0.0188949	5.73453	0.20638	0.674768	0.0252115	0.025545	-0.393387	0.0374656	0.0377885	-0.792931	0.145984	5.7233	-0.729637	0.686201	0.146755
49	YPW1903	m91	2	HO	1	2	2	C	4	C04	1	1	1	1	3	3	14629	11657	4955	4684	-0.782094	53	5.73748	0.198231	5.12696	0.209247	0.894949	0.0186512	0.0187168	0.757771	0.0239091	0.0239045	0.894136	0.0181861	0.0182957	5.73753	0.197952	0.85422	0.0503903	0.0498905	-0.157567	0.0589801	0.0584676	-0.0871028	0.140759	5.7263	-0.0238087	0.877379	0.141531
CTRL	YPW1002	CONTROL	1	PLATE.CONTROL	1	2	2	C	5	C05	1	1	1	1	3	3	10199	7522	3294	3014	-0.756263	54	5.75678	0.205076	5.2371	0.225106	0.911748	0.0193424	0.0194383	0.737286	0.0303054	0.0302961	0.910969	0.018505	0.0187443	5.75648	0.205162	0.904084	0.0585816	0.0583564	-0.100833	0.0648095	0.0646098	0.0445263	0.144339	5.74524	0.10782	0.930501	0.14511
11	YPW1987	m76	2	FUSION	1	2	2	C	6	C06	1	1	1	1	3	3	3336	2490	1093	1065	-0.863735	53	5.73619	0.221409	4.69296	0.277062	0.818854	0.0307001	0.0296841	0.539993	0.0486143	0.0485761	0.818597	0.0283518	0.0283688	5.73731	0.221307	0.696116	0.0430524	0.0435968	-0.362239	0.0614291	0.0618771	-0.67782	0.222054	5.72608	-0.614526	0.708944	0.222826
57	YPW1892	m89	1	HO	1	2	2	C	7	C07	1	1	1	1	3	3	17266	12899	5569	5142	-0.774466	53	5.73432	0.20208	5.09823	0.221827	0.890736	0.0190239	0.0187262	0.703747	0.0326086	0.0325971	0.889809	0.0179673	0.017907	5.73374	0.202033	0.842427	0.0479136	0.047398	-0.171468	0.0569911	0.0562374	-0.120942	0.13833	5.7225	-0.0576476	0.864815	0.139102
24	YPW1924	m63	2	FUSION	1	2	2	C	8	C08	1	1	1	1	3	3	7950	6582	2965	2909	-0.786398	52	5.6953	0.197508	5.31526	0.204235	0.933201	0.0170124	0.0167617	0.830536	0.0180262	0.0180243	0.932937	0.0165646	0.0164847	5.69502	0.197656	0.979864	0.0619145	0.0618355	-0.0203419	0.0633965	0.0628292	0.21632	0.128802	5.68379	0.279614	1.01123	0.129574
68	YPW1992	m156	2	HO	1	2	2	C	9	C09	1	1	1	1	3	3	11932	9364	3979	3766	-0.778414	53	5.73582	0.198537	5.30602	0.209994	0.926297	0.0179555	0.0178869	0.814834	0.0194329	0.0194304	0.925787	0.0178179	0.0175886	5.73576	0.198653	0.953757	0.0629414	0.061312	-0.0473461	0.0662515	0.0645048	0.160407	0.135056	5.72453	0.223701	0.98342	0.135828
CTRL	YPW1002	CONTROL	1	PLATE.CONTROL	1	2	2	C	10	C10	1	1	1	1	3	3	9070	6674	2699	2474	-0.786774	53	5.75084	0.200819	5.23914	0.217083	0.912427	0.019269	0.0188106	0.78302	0.0225022	0.0224984	0.911911	0.0186736	0.0184315	5.75065	0.200839	0.907075	0.0596008	0.0576098	-0.0975297	0.0656348	0.0636857	0.0518976	0.141445	5.73942	0.115192	0.933688	0.142217
25	YPW1927	m66	1	FUSION	1	2	2	C	12	C12	1	1	1	1	3	3	8790	6951	3166	3073	-0.549734	52	5.68107	0.172246	5.1771	0.178209	0.910424	0.0176512	0.0173844	0.855693	0.0112497	0.0112492	0.910177	0.0176592	0.0173036	5.68108	0.172153	0.888601	0.059362	0.0584151	-0.127297	0.0637743	0.0623964	0.00547906	0.150237	5.66985	0.0687731	0.914007	0.151009
59	YPW1900	m90	1	HO	1	2	2	D	1	D01	1	1	1	1	3	4	13557	10658	4652	4380	-0.867863	53	5.74444	0.221277	5.06332	0.236663	0.883186	0.0191284	0.0195172	0.703218	0.031329	0.0313188	0.882231	0.0181766	0.0187008	5.74459	0.221194	0.822712	0.0461106	0.0464014	-0.19515	0.0560842	0.0564495	-0.180202	0.143689	5.73966	-0.109539	0.846356	0.14127
CTRL	YPW1002	CONTROL	1	PLATE.CONTROL	1	2	2	D	2	D02	1	1	1	1	3	4	13826	11060	4467	4151	-0.824672	53	5.74215	0.203638	5.2241	0.208576	0.910667	0.0183811	0.0188414	0.805689	0.018282	0.0182799	0.910009	0.0180322	0.0185984	5.74187	0.203605	0.901062	0.056812	0.0576185	-0.104181	0.0626156	0.0639157	0.0370243	0.143587	5.73694	0.107688	0.930444	0.141168
31	YPW3163	TATA.26	1	FUSION	1	2	2	D	3	D03	1	1	1	1	3	4	4476	3458	1531	1446	-0.658475	53	5.71386	0.190334	4.67608	0.191684	0.818583	0.0179698	0.0177088	0.621415	0.0317129	0.0317023	0.818068	0.0171404	0.0169345	5.71435	0.190148	0.709867	0.0233938	0.0226331	-0.347668	0.0346928	0.0336219	-0.610125	0.107733	5.70942	-0.539461	0.725249	0.105314
74	YPW3016	m156	1	ANCESTOR	1	2	2	D	4	D04	1	1	1	1	3	4	13712	10658	4732	4384	-0.868785	53	5.73754	0.209874	5.30581	0.219709	0.92656	0.0172624	0.0174559	0.794518	0.0230138	0.0230097	0.925945	0.017184	0.0169905	5.73742	0.209774	0.954317	0.0610317	0.0598743	-0.0467591	0.0638867	0.0626838	0.161639	0.131727	5.73249	0.232303	0.987598	0.129308
12	YPW1984	m75	1	FUSION	1	2	2	D	5	D05	1	1	1	1	3	4	7956	6492	2884	2811	-0.627256	52	5.67481	0.17101	4.99324	0.191281	0.879126	0.0203445	0.0198602	0.75923	0.0228859	0.0228819	0.87855	0.0198392	0.0195511	5.67424	0.171005	0.801484	0.053086	0.0521712	-0.224829	0.0630959	0.0616346	-0.248198	0.172923	5.66931	-0.177535	0.823574	0.170504
65	YPW1958	m63	2	HO	1	2	2	D	6	D06	1	1	1	1	3	4	13722	10814	4595	4332	-0.856023	53	5.73305	0.207174	4.99257	0.227585	0.871742	0.0201501	0.0204315	0.694332	0.0309452	0.0309353	0.871353	0.0195465	0.0197534	5.73296	0.206685	0.796376	0.0454443	0.0453644	-0.227683	0.0570685	0.0568083	-0.265271	0.152951	5.72803	-0.194608	0.818093	0.150532
CTRL	YPW1002	CONTROL	1	PLATE.CONTROL	1	2	2	D	7	D07	1	1	1	1	3	4	9841	7501	2965	2737	-0.81241	53	5.74632	0.198748	5.22851	0.214715	0.911452	0.0194895	0.0197222	0.79758	0.0198165	0.0198139	0.910713	0.0196757	0.0194428	5.74622	0.19856	0.903275	0.0624014	0.0599267	-0.101728	0.0688578	0.066614	0.0425236	0.14852	5.74129	0.113187	0.932819	0.146101
1	YPW1002	CONTROL	1	HO	1	2	2	D	8	D08	1	1	1	1	3	4	11989	9394	3862	3654	-0.823732	53	5.72744	0.204887	5.21323	0.215606	0.912014	0.0173109	0.0178619	0.784599	0.0222464	0.0222427	0.911006	0.0171191	0.0174658	5.72744	0.204565	0.904203	0.0547618	0.0545171	-0.100702	0.060497	0.0603194	0.0448196	0.134803	5.72251	0.115483	0.933814	0.132384
34	YPW3166	TATA.81	1	FUSION	1	2	2	D	9	D09	1	1	1	1	3	4	6470	5170	2320	2250	-0.553784	52	5.65758	0.152258	4.95473	0.169209	0.874692	0.0169585	0.0169988	0.776325	0.0173869	0.0173851	0.874016	0.0166589	0.0168164	5.65752	0.152326	0.802619	0.0399966	0.0398641	-0.219876	0.0497168	0.0494174	-0.244443	0.131636	5.65259	-0.17378	0.824792	0.129217
62	YPW1998	m154	1	HO	1	2	2	D	10	D10	1	1	1	1	3	4	14569	11261	4383	4115	-0.722206	53	5.73434	0.199025	5.30117	0.201409	0.925263	0.0159917	0.0166588	0.846091	0.0138067	0.0138058	0.92494	0.0160362	0.0165081	5.73443	0.19908	0.950759	0.0563872	0.0574238	-0.0504949	0.0597201	0.0605032	0.15378	0.127332	5.7295	0.224443	0.983779	0.124913
54	YPW1899	m75	2	HO	1	2	2	D	11	D11	1	1	1	1	3	4	13481	10614	4526	4237	-0.811106	52	5.72875	0.20525	4.6327	0.251403	0.808587	0.0276314	0.0274014	0.52862	0.0488706	0.0488317	0.807611	0.0263257	0.0261432	5.72841	0.205407	0.679954	0.0372089	0.0366579	-0.385731	0.0546692	0.0534784	-0.763727	0.203461	5.72348	-0.693064	0.693146	0.201042
CTRL	YPW1002	CONTROL	1	PLATE.CONTROL	1	2	2	D	12	D12	1	1	1	1	3	4	10879	8254	3004	2805	-0.741971	54	5.74607	0.200404	5.22634	0.207707	0.910532	0.0185947	0.0184799	0.816504	0.0163639	0.0163625	0.910419	0.0182999	0.0182866	5.74612	0.200356	0.902351	0.0578932	0.0568808	-0.102752	0.0636727	0.0630124	0.0402298	0.141295	5.74119	0.110893	0.931827	0.138876
46	YPW2001	m184	3	HO	1	2	2	E	1	E01	2	1	1	1	4	1	18317	14735	6241	5845	-0.385549	52	5.68804	0.140574	5.18329	0.154331	0.910679	0.016872	0.0172361	0.867778	0.00754222	0.00754207	0.910475	0.0168419	0.0172089	5.68807	0.140618	0.902528	0.0529984	0.0532474	-0.102556	0.05857	0.0591603	0.0406689	0.132211	5.68336	0.105759	0.929614	0.132213
4	YPW1989	m142	1	FUSION	1	2	2	E	2	E02	2	1	1	1	4	1	11425	8905	3876	3755	-0.617974	53	5.6963	0.17618	5.44077	0.191454	0.955117	0.0168785	0.0166212	0.870643	0.0148296	0.0148285	0.954912	0.0163625	0.0164639	5.69622	0.176084	1.06988	0.0735695	0.0731053	0.0675433	0.0685666	0.0681491	0.388166	0.128234	5.69151	0.453257	1.10822	0.128236
52	YPW1960	m76	2	HO	1	2	2	E	3	E03	2	1	1	1	4	1	15884	12197	4910	4739	-0.703481	53	5.72482	0.193598	4.10298	0.304378	0.716095	0.0418811	0.0437049	0.313668	0.0702951	0.0701796	0.713949	0.0405496	0.0422981	5.72332	0.194205	0.586397	0.0273485	0.0281296	-0.533758	0.0466707	0.0473056	-1.49617	0.324767	5.71861	-1.43108	0.592222	0.324769
CTRL	YPW1002	CONTROL	1	PLATE.CONTROL	1	2	2	E	4	E04	2	1	1	1	4	1	12760	9599	3652	3323	-0.736233	53	5.74084	0.197351	5.21352	0.212682	0.909378	0.018676	0.0190002	0.79121	0.0205838	0.0205809	0.908692	0.0185453	0.0187084	5.74096	0.197371	0.896951	0.0577326	0.0571588	-0.108754	0.0649633	0.0638085	0.0267269	0.143916	5.73625	0.0918174	0.923663	0.143918
67	YPW1991	m156	1	HO	1	2	2	E	5	E05	2	1	1	1	4	1	7623	5955	2455	2330	-0.817814	53	5.73918	0.203295	5.39536	0.306641	0.932486	0.0256772	0.038862	0.772509	0.0278745	0.0278673	0.931922	0.0260367	0.0385889	5.7394	0.204225	0.976069	0.0956884	0.182062	-0.0242222	0.0984877	0.161932	0.208384	0.382254	5.73469	0.273475	1.0081	0.382256
60	YPW1901	m90	2	HO	1	2	2	E	6	E06	2	1	1	1	4	1	12584	9812	4021	3729	-0.670357	53	5.72206	0.183424	5.03023	0.21108	0.88033	0.0187615	0.0195622	0.701796	0.0312011	0.0311909	0.879383	0.0179951	0.0189422	5.72165	0.183553	0.8156	0.0446073	0.0464459	-0.203832	0.0546868	0.0567321	-0.202472	0.147066	5.71694	-0.137381	0.83684	0.147068
16	YPW1974	m89	1	FUSION	1	2	2	E	7	E07	2	1	1	1	4	1	10056	7963	3405	3306	-0.62737	52	5.68497	0.180534	5.35208	0.192692	0.941157	0.0171237	0.016731	0.84304	0.017259	0.0172573	0.940798	0.0167394	0.0165147	5.68486	0.180192	1.0103	0.0666176	0.0658139	0.010248	0.0661912	0.0648948	0.277791	0.128916	5.68015	0.342882	1.04464	0.128918
18	YPW1976	m90	1	FUSION	1	2	2	E	8	E08	2	1	1	1	4	1	10022	7742	3326	3223	-0.649172	52	5.68654	0.182653	5.32567	0.191277	0.936628	0.01671	0.0163029	0.848664	0.0154689	0.0154676	0.936217	0.0164436	0.0161181	5.68652	0.182716	0.992335	0.0632935	0.0623934	-0.00769498	0.0642783	0.0624409	0.241965	0.126674	5.68181	0.307056	1.02546	0.126676
CTRL	YPW1002	CONTROL	1	PLATE.CONTROL	1	2	2	E	9	E09	2	1	1	1	4	1	12783	9823	3852	3586	-0.697438	53	5.73545	0.19334	5.21603	0.201786	0.910931	0.0178771	0.0186346	0.790673	0.0209675	0.0209644	0.910378	0.0176562	0.0183276	5.73555	0.193264	0.902222	0.055388	0.0571395	-0.102894	0.0613986	0.0632191	0.0399108	0.141983	5.73084	0.105001	0.929289	0.141985
6	YPW1969	m184	2	FUSION	1	2	2	E	10	E10	2	1	1	1	4	1	12527	10083	4363	4282	-0.672531	53	5.69328	0.177198	5.47408	0.187167	0.961622	0.0152883	0.0154246	0.920138	0.00728654	0.00728641	0.961294	0.0154492	0.0153827	5.69332	0.177153	1.09905	0.0726599	0.0720734	0.0944448	0.0661627	0.0653143	0.43807	0.120269	5.68861	0.503161	1.13935	0.120271
27	YPW1966	m156	1	FUSION	1	2	2	E	11	E11	2	1	1	1	4	1	10177	7967	3401	3305	-0.600406	52	5.67023	0.1642	5.50626	0.174834	0.969428	0.0151471	0.0153547	0.930287	0.00690302	0.00690291	0.969165	0.0151487	0.0153203	5.67022	0.164139	1.13709	0.0754023	0.0765467	0.128476	0.0663578	0.0669472	0.499623	0.120109	5.66551	0.564713	1.17996	0.120111
50	YPW1961	V	1	HO	1	2	2	E	12	E12	2	1	1	1	4	1	14570	11113	4543	4158	-0.698911	53	5.71219	0.182382	5.31317	0.19286	0.930393	0.0177376	0.0179833	0.818658	0.0195607	0.0195583	0.929628	0.0173867	0.0177172	5.71209	0.18239	0.967601	0.0636537	0.0641417	-0.0329352	0.0660528	0.0662496	0.190446	0.137108	5.70738	0.255537	0.999065	0.13711
CTRL	YPW1002	CONTROL	1	PLATE.CONTROL	1	2	2	F	1	F01	2	1	1	1	4	2	13169	10067	3980	3693	-0.727056	53	5.73237	0.191911	5.21449	0.204968	0.911572	0.0183117	0.0192333	0.767918	0.0250603	0.025055	0.910733	0.0181596	0.0188046	5.73228	0.191836	0.90334	0.0574118	0.0580013	-0.101656	0.0634337	0.0644673	0.042685	0.143725	5.74155	0.106547	0.929953	0.146198
26	YPW1928	m66	2	FUSION	1	2	2	F	2	F02	2	1	1	1	4	2	10316	8163	3601	3509	-0.570867	53	5.68762	0.178153	5.1852	0.182726	0.911243	0.0171408	0.0170419	0.856439	0.0112497	0.0112492	0.911	0.0172021	0.0169546	5.68771	0.178203	0.891389	0.0585731	0.0574514	-0.124309	0.0627191	0.0612666	0.012623	0.146707	5.69697	0.0764848	0.917214	0.14918
55	YPW1956	m221	1	HO	1	2	2	F	3	F03	2	1	1	1	4	2	16554	13436	5689	5391	-0.652512	52	5.69599	0.172079	5.21415	0.18636	0.915253	0.0170714	0.0176428	0.811848	0.0181541	0.0181521	0.914682	0.0167228	0.0174362	5.69581	0.172028	0.915998	0.0545455	0.0558593	-0.0877412	0.0595544	0.0610842	0.0735681	0.134208	5.70507	0.13743	0.943445	0.136681
2	YPW978	NULL	1	NULL	1	2	2	F	4	F04	2	1	1	1	4	2	15292	7822	3171	3048	-0.712827	53	5.71407	0.180689	3.22363	0.363372	0.560881	0.0628359	0.0712729	0.826953	-0.0465644	-0.0465308	0.563364	0.0628105	0.0709505	5.71538	0.181383	0.526462	0.0129408	0.0154649	-0.641577	0.0245468	0.0285552	-2.67374	0.579657	5.72464	-2.60988	0.528221	0.582131
56	YPW1894	m123	1	HO	1	2	2	F	5	F05	2	1	1	1	4	2	13319	9872	4212	3785	-0.759026	53	5.72368	0.202568	5.19573	0.218859	0.908371	0.0171906	0.0176699	0.764934	0.0250603	0.025055	0.90796	0.0168172	0.0171848	5.72343	0.202087	0.894683	0.0515759	0.0522676	-0.111286	0.0578033	0.0585098	0.020998	0.132356	5.73269	0.0848598	0.920724	0.13483
CTRL	YPW1002	CONTROL	1	PLATE.CONTROL	1	2	2	F	6	F06	2	1	1	1	4	2	10363	8148	3076	2904	-0.748886	53	5.72526	0.191278	5.2124	0.189893	0.911557	0.018154	0.0182123	0.842026	0.0121446	0.012144	0.91102	0.0181386	0.0181115	5.72513	0.191337	0.904245	0.0576833	0.0565983	-0.100655	0.0633447	0.0625697	0.0449251	0.139934	5.73439	0.108787	0.930918	0.142408
69	YPW1993	REF	1	HO	1	2	2	F	7	F07	2	1	1	1	4	2	12815	9853	4069	3730	-0.65297	53	5.71492	0.182763	5.30468	0.192437	0.929945	0.0173849	0.0174229	0.832042	0.0171311	0.0171295	0.92947	0.0175038	0.0172167	5.71459	0.182629	0.967021	0.0640693	0.0617766	-0.0335346	0.0660818	0.0641119	0.189206	0.132216	5.72385	0.253068	0.997834	0.13469
64	YPW1896	m63	1	HO	1	2	2	F	8	F08	2	1	1	1	4	2	13946	10754	4571	4259	-0.42311	52	5.66736	0.144057	4.93016	0.17939	0.867567	0.0209498	0.021556	0.774102	0.0164918	0.0164903	0.866967	0.0208997	0.0214474	5.66718	0.143983	0.786377	0.0468509	0.0480353	-0.240319	0.0598789	0.0606154	-0.299565	0.167607	5.67644	-0.235703	0.805277	0.170081
29	YPW1964	REF	1	FUSION	1	2	2	F	9	F09	2	1	1	1	4	2	12199	9781	4303	4181	-0.622162	52	5.68443	0.172997	5.4171	0.182436	0.951849	0.0164571	0.0162202	0.914063	0.00664735	0.00664725	0.951767	0.0163882	0.0161883	5.68438	0.172854	1.05602	0.0714346	0.0699855	0.0545113	0.0675345	0.0661913	0.363568	0.125818	5.69364	0.42743	1.09271	0.128292
23	YPW1923	m63	1	FUSION	1	2	2	F	10	F10	2	1	1	1	4	2	10739	8530	3561	3468	-0.595834	53	5.69153	0.172811	5.32595	0.183992	0.935696	0.0158475	0.0156996	0.846199	0.0157246	0.0157233	0.935225	0.0156218	0.0155177	5.6915	0.172853	0.988532	0.0598545	0.0594521	-0.0115346	0.0605525	0.0598176	0.234214	0.121641	5.70076	0.298076	1.02076	0.124115
CTRL	YPW1002	CONTROL	1	PLATE.CONTROL	1	2	2	F	11	F11	2	1	1	1	4	2	10100	7527	2997	2761	-0.802668	54	5.74311	0.202859	5.2262	0.221969	0.911741	0.0195863	0.0196604	0.790588	0.0210954	0.0210922	0.910867	0.0193975	0.0193159	5.74279	0.202814	0.903764	0.0608573	0.0602707	-0.101187	0.0676801	0.0666291	0.0437353	0.149192	5.75205	0.107597	0.930405	0.151665
37	YPW3169	TATA.129	1	FUSION	1	2	2	F	12	F12	2	1	1	1	4	2	10624	8588	3838	3740	-0.693435	52	5.67665	0.184543	5.20781	0.202266	0.917249	0.0172542	0.0168674	0.789512	0.0225022	0.0224984	0.915939	0.0167269	0.0164667	5.67663	0.184562	0.920109	0.0546038	0.0541972	-0.0832635	0.0594954	0.0585917	0.083396	0.128941	5.68589	0.147258	0.947827	0.131414
22	YPW1983	m154	2	FUSION	1	2	2	G	1	G01	2	1	1	1	4	3	11778	9382	3948	3828	-0.712107	52	5.69946	0.189926	5.51429	0.196459	0.968485	0.0156341	0.0156598	0.916755	0.0090763	0.00907605	0.96843	0.0155283	0.0155896	5.69952	0.189765	1.13344	0.076593	0.0768597	0.125258	0.0677388	0.0677198	0.493875	0.121295	5.70443	0.55838	1.17566	0.122895
13	YPW1985	m75	2	FUSION	1	2	2	G	2	G02	2	1	1	1	4	3	7856	6300	2669	2590	-0.581921	52	5.67029	0.171681	4.99428	0.189674	0.879422	0.0191055	0.019286	0.800962	0.0155967	0.0155955	0.879008	0.0189518	0.0191408	5.67043	0.171929	0.8027	0.0505193	0.0511605	-0.223379	0.0599835	0.0603995	-0.244173	0.168892	5.67534	-0.179668	0.822884	0.170492
CTRL	YPW1002	CONTROL	1	PLATE.CONTROL	1	2	2	G	3	G03	2	1	1	1	4	3	11233	8725	3204	3034	-0.69794	54	5.72883	0.178689	5.2118	0.189946	0.910006	0.01753	0.0184074	0.831643	0.0136788	0.013678	0.909511	0.0173868	0.0182868	5.72863	0.178625	0.899502	0.0546158	0.0561443	-0.105914	0.0607337	0.0625343	0.0331271	0.140459	5.73354	0.0976316	0.926135	0.14206
39	YPW3171	m75.TATA.42	1	FUSION	1	2	2	G	4	G04	2	1	1	1	4	3	8268	6666	3144	3034	-0.510206	52	5.66998	0.165531	4.53164	0.179749	0.798106	0.0207874	0.0205889	0.629902	0.0296657	0.029657	0.797133	0.0205132	0.0201242	5.67005	0.165469	0.665778	0.0266704	0.0262912	-0.406799	0.040054	0.0392165	-0.845671	0.158385	5.67496	-0.781167	0.676839	0.159985
70	YPW2550	TATA.26	1	HO	1	2	2	G	5	G05	2	1	1	1	4	3	18141	14177	5952	5560	-0.693366	52	5.69701	0.181324	4.20568	0.202197	0.738521	0.0207035	0.0215394	0.442582	0.0519463	0.0518997	0.736683	0.0187996	0.0199611	5.6966	0.181447	0.603249	0.0151359	0.015902	-0.505426	0.0251931	0.0263148	-1.31839	0.153692	5.7015	-1.25388	0.610143	0.155292
5	YPW1968	m184	1	FUSION	1	2	2	G	6	G06	2	1	1	1	4	3	9782	7771	2983	2901	-0.720355	52	5.69598	0.186715	5.47645	0.195444	0.960867	0.0167082	0.0161577	0.907712	0.00933199	0.00933172	0.96062	0.0165143	0.0160875	5.6961	0.186571	1.0959	0.0771315	0.0748416	0.0915747	0.0706345	0.0680641	0.4328	0.125549	5.70101	0.497305	1.13562	0.127149
38	YPW3170	TATA.129	2	FUSION	1	2	2	G	7	G07	2	1	1	1	4	3	7151	5611	2386	2329	-0.563147	53	5.67955	0.168171	5.21438	0.184484	0.917618	0.0170717	0.016744	0.8225	0.0167475	0.016746	0.917082	0.0173708	0.0165502	5.67937	0.168105	0.923883	0.0573438	0.0549405	-0.0791698	0.0623301	0.0591604	0.0923356	0.129546	5.68428	0.15684	0.952141	0.131146
CTRL	YPW1002	CONTROL	1	PLATE.CONTROL	1	2	2	G	8	G08	2	1	1	1	4	3	14643	11027	4355	3966	-0.69481	53	5.73058	0.190035	5.23232	0.19549	0.913757	0.0176449	0.0178927	0.813387	0.0175147	0.0175129	0.913255	0.0176587	0.0176746	5.73046	0.189916	0.911376	0.05644	0.0558808	-0.0927994	0.0622692	0.0614734	0.0624021	0.135767	5.73537	0.126907	0.938801	0.137367
48	YPW1902	m91	1	HO	1	2	2	G	9	G09	2	1	1	1	4	3	18926	14964	6280	5952	-0.738204	53	5.71709	0.194597	5.12404	0.20338	0.896851	0.0177506	0.0183991	0.749192	0.0258278	0.025822	0.895861	0.017458	0.0179202	5.71693	0.194555	0.859032	0.0495356	0.0500143	-0.151949	0.057157	0.0580534	-0.0736184	0.139219	5.72184	-0.00911385	0.882969	0.140819
20	YPW1972	m153	1	FUSION	1	2	2	G	10	G10	2	1	1	1	4	3	11646	9153	3912	3762	-0.662422	52	5.68635	0.182397	5.50573	0.184622	0.968392	0.0154893	0.015408	0.934228	0.00600816	0.00600809	0.968063	0.0153926	0.0153782	5.68631	0.182278	1.13163	0.0766654	0.0755873	0.123655	0.0675267	0.0667216	0.491006	0.11963	5.69121	0.55551	1.17373	0.12123
9	YPW2002	V	1	FUSION	1	2	2	G	11	G11	2	1	1	1	4	3	19884	15599	6755	6399	-0.646697	53	5.70521	0.179735	5.28609	0.188161	0.926849	0.0164325	0.0170034	0.822546	0.018282	0.0182799	0.926309	0.0162122	0.0167677	5.70504	0.17958	0.955614	0.057844	0.0594159	-0.0454012	0.0604077	0.0620364	0.164488	0.130346	5.70995	0.228993	0.985986	0.131946
75	YPW1141	m156	2	ANCESTOR	1	2	2	G	12	G12	2	1	1	1	4	3	12471	9015	3459	3062	-0.671487	54	5.73053	0.183455	5.28922	0.193915	0.9239	0.0184995	0.0185219	0.83379	0.0157246	0.0157233	0.923502	0.018405	0.0183546	5.73043	0.183324	0.945717	0.0640345	0.0630773	-0.0558121	0.0674028	0.0667659	0.142537	0.14145	5.73533	0.207041	0.97543	0.14305
35	YPW3167	TATA.81	2	FUSION	1	2	2	H	2	H02	2	1	1	1	4	4	9034	7241	3157	3094	-0.53278	52	5.66326	0.156628	4.95799	0.174031	0.873966	0.0176899	0.0171831	0.771155	0.0181541	0.0181521	0.873373	0.0174842	0.0169858	5.66315	0.156473	0.801099	0.0412966	0.0401648	-0.221771	0.0511472	0.0498374	-0.249474	0.133298	5.66901	-0.187721	0.820292	0.134142
19	YPW1977	m90	2	FUSION	1	2	2	H	3	H03	2	1	1	1	4	4	9874	7979	3609	3527	-0.566361	52	5.67646	0.166562	5.32082	0.174522	0.937173	0.0159242	0.015824	0.87912	0.0102269	0.0102265	0.93682	0.0158464	0.01575	5.6763	0.166746	0.994666	0.0617668	0.0609253	-0.00534805	0.061741	0.0610011	0.246688	0.12311	5.68216	0.308441	1.02619	0.123955
45	YPW2000	m184	2	HO	1	2	2	H	4	H04	2	1	1	1	4	4	15664	12177	4700	4413	-0.723711	53	5.71284	0.193044	5.24726	0.203317	0.919853	0.0173194	0.0176017	0.805914	0.0199444	0.0199418	0.919215	0.0170484	0.0173014	5.71289	0.192981	0.931016	0.0578408	0.0573523	-0.0714792	0.0619217	0.0617702	0.109014	0.132996	5.71876	0.170767	0.958485	0.13384
CTRL	YPW1002	CONTROL	1	PLATE.CONTROL	1	2	2	H	5	H05	2	1	1	1	4	4	12658	9665	4030	3717	-0.711819	53	5.72777	0.191943	5.20886	0.204336	0.911182	0.0182409	0.0187821	0.799875	0.0194329	0.0194304	0.910726	0.0180532	0.018517	5.72736	0.191535	0.903319	0.0569153	0.057289	-0.10168	0.0629546	0.0635939	0.0426319	0.141967	5.73322	0.104385	0.929024	0.142812
42	YPW1895	m131	1	HO	1	2	2	H	6	H06	2	1	1	1	4	4	13356	10408	4315	4063	-0.715532	53	5.718	0.19278	5.13789	0.209869	0.899656	0.0225736	0.0223747	0.77172	0.0223743	0.0223706	0.898998	0.0219518	0.022092	5.71766	0.192951	0.867954	0.0639785	0.0616145	-0.141616	0.0733735	0.0713804	-0.0490856	0.167352	5.72352	0.0126675	0.891407	0.168197
61	YPW1996	m153	1	HO	1	2	2	H	7	H07	2	1	1	1	4	4	14137	10957	4649	4346	-0.81598	53	5.72701	0.208776	5.28313	0.227415	0.924312	0.0190422	0.0188344	0.764674	0.0278745	0.0278673	0.92318	0.0184456	0.0182132	5.72711	0.208707	0.944596	0.0643744	0.062401	-0.0569978	0.0680705	0.0661502	0.14002	0.140286	5.73297	0.201773	0.972931	0.14113
15	YPW1962	m123	1	FUSION	1	2	2	H	8	H08	2	1	1	1	4	4	10487	8223	3590	3462	-0.638519	52	5.68109	0.178065	5.43959	0.187841	0.957336	0.0150117	0.0154247	0.91594	0.00728654	0.00728641	0.957055	0.0151127	0.0153822	5.68116	0.178221	1.07951	0.0682456	0.0695971	0.0765077	0.0632282	0.0642647	0.404924	0.120051	5.68703	0.466677	1.11644	0.120896
51	YPW1953	m76	1	HO	1	2	2	H	9	H09	2	1	1	1	4	4	17109	13145	5400	5061	-0.695936	53	5.70097	0.18534	5.2182	0.201795	0.915647	0.018097	0.0184906	0.790279	0.0219906	0.0219871	0.915009	0.0177792	0.0181541	5.701	0.185303	0.917061	0.0581674	0.0585009	-0.0865809	0.0633671	0.0637799	0.0761199	0.140196	5.70686	0.137873	0.943642	0.14104
CTRL	YPW1002	CONTROL	1	PLATE.CONTROL	1	2	2	H	10	H10	2	1	1	1	4	4	11476	8700	3596	3319	-0.80395	53	5.74404	0.207586	5.23464	0.225421	0.913451	0.0190372	0.0191346	0.757747	0.027107	0.0271003	0.912361	0.018649	0.0185702	5.74418	0.207919	0.908511	0.0595542	0.0589684	-0.0959481	0.0660043	0.0647069	0.0554166	0.144273	5.75004	0.11717	0.934547	0.145117
32	YPW3164	TATA.26	2	FUSION	1	2	2	H	11	H11	2	1	1	1	4	4	5472	4321	1844	1754	-0.53704	52	5.668	0.163376	4.62277	0.180264	0.815904	0.0182389	0.0184769	0.582467	0.0383683	0.0383495	0.814717	0.0181401	0.0175703	5.66796	0.163175	0.705402	0.0237536	0.023022	-0.35433	0.0356984	0.0343551	-0.631608	0.111964	5.67382	-0.569855	0.7185	0.112808
17	YPW1975	m89	2	FUSION	1	2	2	H	12	H12	2	1	1	1	4	4	10174	8084	3514	3418	-0.525272	53	5.67354	0.163539	5.34832	0.174785	0.942636	0.0157743	0.0155586	0.901296	0.00728654	0.00728641	0.942323	0.0157529	0.0155212	5.67355	0.163423	1.01642	0.0636123	0.0625021	0.0162911	0.0625518	0.061341	0.289715	0.120977	5.67941	0.351468	1.04933	0.121822
CTRL	YPW1002	CONTROL	1	PLATE.CONTROL	1	3	3	A	1	A01	1	1	1	1	5	1	13338	10141	4081	3791	-0.770687	53	5.74302	0.197676	5.22714	0.206045	0.911685	0.017345	0.0173988	0.788331	0.021479	0.0214757	0.911037	0.0169775	0.0170292	5.74317	0.197619	0.904299	0.0538653	0.0533751	-0.100595	0.0594979	0.058967	0.0450575	0.131948	5.76266	0.109526	0.931237	0.136458
58	YPW1893	m89	2	HO	1	3	3	A	2	A02	1	1	1	1	5	1	14629	11487	4660	4331	-0.591419	53	5.69435	0.161032	5.059	0.182161	0.888497	0.0178238	0.0180581	0.781481	0.0187935	0.0187913	0.888252	0.017377	0.0178527	5.69428	0.16112	0.83828	0.0465102	0.0466863	-0.176403	0.0553901	0.055656	-0.133118	0.137922	5.71378	-0.0686498	0.860821	0.142432
3	YPW1980	m131	1	FUSION	1	3	3	A	3	A03	1	1	1	1	5	1	11357	9379	3930	3803	-0.645663	52	5.68281	0.180398	5.39089	0.190556	0.948229	0.0165296	0.0161366	0.888659	0.0104826	0.0104822	0.947889	0.0161858	0.0160529	5.68283	0.18085	1.03941	0.068146	0.0677383	0.0386534	0.0653826	0.0648786	0.333244	0.125528	5.70232	0.397713	1.07535	0.130038
77	YPW1004	REF	2	ANCESTOR	1	3	3	A	4	A04	1	1	1	1	5	1	13829	10733	4430	4177	-0.755475	53	5.73313	0.194352	5.21952	0.205906	0.911359	0.0179997	0.0185388	0.806546	0.018282	0.0182799	0.911113	0.0180361	0.0182975	5.73295	0.193792	0.904542	0.057415	0.0574277	-0.100326	0.0629937	0.063348	0.0456589	0.141881	5.75245	0.110127	0.931496	0.146391
63	YPW1999	m154	2	HO	1	3	3	A	5	A05	1	1	1	1	5	1	18503	14228	5878	5497	-0.643756	53	5.70769	0.178322	5.27607	0.189647	0.925327	0.0166179	0.0170313	0.819519	0.0185377	0.0185356	0.924845	0.0165203	0.0167849	5.70768	0.178312	0.950424	0.058242	0.0584467	-0.0508473	0.0611517	0.0615346	0.153037	0.129697	5.72717	0.217505	0.980433	0.134207
CTRL	YPW1002	CONTROL	1	PLATE.CONTROL	1	3	3	A	6	A06	1	1	1	1	5	1	14693	11106	4170	3867	-0.633869	53	5.70173	0.169402	5.19622	0.184455	0.910751	0.0184337	0.0184573	0.808699	0.0178984	0.0178964	0.910162	0.0182533	0.0182642	5.70141	0.169059	0.901542	0.0571371	0.0566977	-0.103649	0.0632962	0.0628587	0.0382189	0.141123	5.7209	0.102687	0.928296	0.145634
40	YPW3172	m75.TATA.42	2	FUSION	1	3	3	A	7	A07	1	1	1	1	5	1	4469	3376	1500	1432	-0.238083	51	5.61634	0.133691	4.50697	0.15386	0.802134	0.0177469	0.018165	0.672881	0.0230138	0.0230097	0.802015	0.0173324	0.0179324	5.61608	0.133573	0.672239	0.0230125	0.0239482	-0.397142	0.0343845	0.0355466	-0.807491	0.138865	5.63557	-0.743022	0.683723	0.143375
72	YPW2651	TATA.129	1	HO	1	3	3	A	8	A08	1	1	1	1	5	1	18632	14131	5888	5415	-0.757441	53	5.70954	0.194358	4.87905	0.215278	0.855401	0.0183562	0.0190023	0.661914	0.0338884	0.0338754	0.854647	0.017796	0.0181603	5.70919	0.194571	0.760053	0.0359964	0.0365283	-0.274367	0.0474209	0.0479932	-0.395911	0.140347	5.72868	-0.331443	0.777385	0.144857
7	YPW1970	m160	1	FUSION	1	3	3	A	9	A09	1	1	1	1	5	1	14824	12308	5275	5156	-0.655327	52	5.68487	0.175318	5.43195	0.185205	0.95528	0.0155253	0.015317	0.901502	0.00945983	0.00945955	0.955066	0.0154433	0.015249	5.68475	0.175354	1.07056	0.0684215	0.0680409	0.0681842	0.0640707	0.0633156	0.389369	0.119207	5.70424	0.453837	1.10857	0.123717
53	YPW1898	m75	1	HO	1	3	3	A	10	A10	1	1	1	1	5	1	19162	14660	6119	5695	-0.72601	53	5.70764	0.1868	4.52389	0.233746	0.792503	0.0280433	0.0284955	0.566934	0.0395206	0.0395	0.791363	0.0279899	0.0277957	5.70736	0.186455	0.658455	0.0344708	0.0343833	-0.417858	0.052469	0.0517282	-0.890789	0.216692	5.72685	-0.82632	0.669022	0.221203
CTRL	YPW1002	CONTROL	1	PLATE.CONTROL	1	3	3	A	11	A11	1	1	1	1	5	1	15567	11724	4547	4240	-0.726457	53	5.71989	0.186726	5.20612	0.211663	0.911526	0.0188946	0.0190512	0.771842	0.0244207	0.0244159	0.911062	0.0182092	0.0186491	5.71961	0.186524	0.90438	0.0572371	0.0579621	-0.100506	0.0632734	0.0642128	0.045258	0.143258	5.73911	0.109727	0.931323	0.147769
8	YPW1988	m91	1	FUSION	1	3	3	A	12	A12	1	1	1	1	5	1	16057	12721	5441	5319	-0.558847	52	5.67864	0.172411	5.37725	0.186933	0.947376	0.0163225	0.0163165	0.86389	0.0147017	0.0147006	0.947073	0.0160562	0.0161635	5.67858	0.172264	1.03598	0.0677631	0.0676125	0.035345	0.0653026	0.0650461	0.326862	0.126097	5.69807	0.39133	1.07168	0.130607
66	YPW1897	m66	1	HO	1	3	3	B	1	B01	1	1	1	1	5	2	22968	17470	6849	6442	-0.755243	53	5.70957	0.19132	4.81901	0.228323	0.843831	0.0254485	0.0260044	0.642305	0.0352962	0.0352816	0.843506	0.0249238	0.0253698	5.70918	0.191326	0.738339	0.0464351	0.0469648	-0.303353	0.0630441	0.063107	-0.48303	0.196871	5.71695	-0.419592	0.753962	0.201938
43	YPW1949	m142	1	HO	1	3	3	B	2	B02	1	1	1	1	5	2	19428	15798	6404	6016	-0.533594	52	5.66966	0.14566	5.15664	0.169279	0.907978	0.016814	0.0172538	0.838397	0.0122725	0.0122718	0.907607	0.0169049	0.0171765	5.66945	0.145587	0.893594	0.0517551	0.0525584	-0.112504	0.0580062	0.0586713	0.0182372	0.133461	5.67722	0.0816755	0.919386	0.138528
CTRL	YPW1002	CONTROL	1	PLATE.CONTROL	1	3	3	B	3	B03	1	1	1	1	5	2	16079	12312	4774	4455	-0.750342	53	5.72708	0.191352	5.21705	0.202899	0.911382	0.0176595	0.0178772	0.79423	0.0204559	0.0204531	0.910674	0.0172283	0.0175681	5.72678	0.191204	0.903154	0.0546588	0.054907	-0.101862	0.0600257	0.0607073	0.0422236	0.13612	5.73456	0.105662	0.929573	0.141187
21	YPW1982	m154	1	FUSION	1	3	3	B	4	B04	1	1	1	1	5	2	18988	15625	6357	6231	-0.644104	52	5.68997	0.178011	5.503	0.186503	0.967243	0.0152681	0.0151587	0.930147	0.00651951	0.00651942	0.967144	0.0152998	0.015125	5.68992	0.177895	1.1271	0.0745806	0.0741497	0.119647	0.0663569	0.0655562	0.483815	0.118201	5.69769	0.547254	1.16818	0.123269
73	YPW2653	m75.TATA.42	1	HO	1	3	3	B	5	B05	1	1	1	1	5	2	19917	14359	5491	5143	-0.709568	53	5.72194	0.194981	3.99752	0.254662	0.698567	0.0314145	0.0341811	0.278697	0.0733789	0.0732476	0.6963	0.0297025	0.0320859	5.72144	0.195421	0.575231	0.0176458	0.0183161	-0.552984	0.0306913	0.0316892	-1.63418	0.242762	5.72922	-1.57074	0.580172	0.24783
76	YPW1002	REF	1	ANCESTOR	1	3	3	B	6	B06	1	1	1	1	5	2	19252	15353	6104	5755	-0.595303	52	5.68755	0.160832	5.18225	0.174568	0.910624	0.0158281	0.0165125	0.822644	0.0154689	0.0154676	0.910159	0.0157088	0.0163628	5.68757	0.160698	0.901532	0.0492431	0.0510184	-0.10366	0.0546386	0.056505	0.0381929	0.126991	5.69534	0.101631	0.927844	0.132058
14	YPW1978	m221	1	FUSION	1	3	3	B	7	B07	1	1	1	1	5	2	12606	10317	4377	4247	-0.580199	52	5.67602	0.160584	5.46315	0.17304	0.961314	0.0153169	0.0154208	0.936644	0.00434631	0.00434628	0.961177	0.0154529	0.0154079	5.67596	0.160567	1.0985	0.0715049	0.0722111	0.0939448	0.0653634	0.0654193	0.437153	0.12061	5.68373	0.500592	1.13771	0.125677
CTRL	YPW1002	CONTROL	1	PLATE.CONTROL	1	3	3	B	8	B08	1	1	1	1	5	2	15418	11699	4780	4444	-0.726566	53	5.72935	0.195056	5.22449	0.208639	0.912379	0.018291	0.0181414	0.784189	0.0223743	0.0223706	0.911955	0.0177969	0.0177768	5.72917	0.194866	0.907215	0.056085	0.0560588	-0.0973758	0.0621766	0.0617389	0.0522404	0.13759	5.73694	0.115679	0.933899	0.142657
47	YPW1954	m160	1	HO	1	3	3	B	9	B09	1	1	1	1	5	2	15924	12055	4624	4322	-0.68502	53	5.71501	0.184653	5.16431	0.200739	0.904243	0.0171202	0.0174366	0.77345	0.0228859	0.0228819	0.903678	0.016851	0.0170625	5.71481	0.184917	0.881679	0.0502591	0.0502338	-0.125927	0.0570145	0.0570367	-0.0124843	0.131538	5.72258	0.050954	0.906691	0.136605
2	YPW978	NULL	1	NULL	1	3	3	B	10	B10	1	1	1	1	5	2	20471	10319	4114	3946	-0.785121	53	5.71869	0.194806	3.23729	0.36359	0.563679	0.0639128	0.0678903	0.859277	-0.05169	-0.051644	0.565912	0.0635908	0.0673889	5.71856	0.194498	0.526999	0.0133539	0.0143165	-0.640557	0.0253255	0.026637	-2.65382	0.526023	5.72633	-2.59038	0.528781	0.53109
30	YPW1965	REF	2	FUSION	1	3	3	B	11	B11	1	1	1	1	5	2	20914	17006	7196	7038	-0.643541	52	5.67746	0.168713	5.44562	0.179957	0.958403	0.0153561	0.0154493	0.925743	0.00575249	0.00575243	0.958132	0.0154011	0.0154246	5.67741	0.168796	1.08441	0.0702533	0.0703944	0.081038	0.064873	0.0647028	0.413343	0.120409	5.68519	0.476782	1.1227	0.125476
44	YPW1952	m184	1	HO	1	3	3	B	12	B12	1	1	1	1	5	2	20311	15826	6310	6048	-0.665534	52	5.69197	0.175769	4.05304	0.285235	0.710878	0.0413603	0.0446044	0.280769	0.0755641	0.0754207	0.708928	0.0402561	0.0431903	5.69136	0.175471	0.583062	0.0260677	0.0281013	-0.539462	0.044769	0.0473253	-1.53543	0.337433	5.69913	-1.47199	0.588516	0.3425
10	YPW1986	m76	1	FUSION	1	3	3	C	1	C01	1	1	1	1	5	3	6361	5032	2061	2001	-0.691041	53	5.69326	0.188057	4.64829	0.237797	0.815305	0.030288	0.0301219	0.609254	0.0361922	0.0361764	0.814535	0.0296501	0.0295473	5.69395	0.188531	0.689978	0.0434782	0.0436679	-0.371096	0.0632955	0.0626239	-0.709582	0.229594	5.70914	-0.656445	0.700358	0.234236
28	YPW1967	m156	2	FUSION	1	3	3	C	2	C02	1	1	1	1	5	3	16344	13069	5298	5179	-0.613265	52	5.67885	0.167705	5.51144	0.178588	0.969719	0.0150094	0.014998	0.95883	0.00191748	0.00191748	0.969645	0.0150415	0.014995	5.67888	0.167766	1.13949	0.0751731	0.0749192	0.130579	0.066127	0.065539	0.503373	0.117115	5.69407	0.55651	1.1744	0.121757
71	YPW2605	TATA.81	1	HO	1	3	3	C	3	C03	1	1	1	1	5	3	17992	13898	5906	5484	-0.709146	53	5.71176	0.188063	4.60414	0.205723	0.807102	0.0199101	0.0202336	0.56528	0.0423376	0.0423123	0.805732	0.0188672	0.0190862	5.71142	0.188002	0.677324	0.0261863	0.0261727	-0.389605	0.0386474	0.038574	-0.778428	0.147417	5.7266	-0.725291	0.687013	0.152059
49	YPW1903	m91	2	HO	1	3	3	C	4	C04	1	1	1	1	5	3	15000	11629	4755	4467	-0.734218	53	5.71156	0.194607	5.11666	0.210875	0.897019	0.0176752	0.0180747	0.755347	0.0248044	0.0247994	0.896323	0.0176256	0.0176156	5.71144	0.194526	0.860334	0.0494536	0.0493503	-0.150434	0.0577357	0.0572063	-0.0699989	0.136874	5.72663	-0.0168621	0.880011	0.141516
CTRL	YPW1002	CONTROL	1	PLATE.CONTROL	1	3	3	C	5	C05	1	1	1	1	5	3	10433	8013	3226	2976	-0.613216	53	5.7119	0.173537	5.20242	0.185936	0.912246	0.017965	0.0181938	0.801978	0.019305	0.0193026	0.91208	0.01799	0.0179582	5.71174	0.173493	0.907612	0.0574029	0.0563679	-0.0969378	0.0632161	0.0621979	0.0532153	0.138214	5.72692	0.106352	0.929869	0.142856
11	YPW1987	m76	2	FUSION	1	3	3	C	6	C06	1	1	1	1	5	3	8929	7054	3233	3158	-0.659138	52	5.67185	0.17649	4.64321	0.235712	0.817565	0.0293155	0.0293299	0.584696	0.041057	0.041034	0.816333	0.0290895	0.0286305	5.67167	0.176644	0.692671	0.043634	0.0434941	-0.3672	0.0630183	0.0619412	-0.695522	0.225488	5.68686	-0.642385	0.703198	0.23013
57	YPW1892	m89	1	HO	1	3	3	C	7	C07	1	1	1	1	5	3	20394	15864	6491	6142	-0.695856	53	5.70588	0.18377	5.07394	0.198453	0.890134	0.0178032	0.0181662	0.752252	0.0241649	0.0241602	0.889427	0.0175952	0.0177651	5.70577	0.183917	0.841404	0.0468156	0.0472684	-0.172683	0.0558693	0.0559632	-0.123931	0.138365	5.72096	-0.0707942	0.860048	0.143007
24	YPW1924	m63	2	FUSION	1	3	3	C	8	C08	1	1	1	1	5	3	12057	9602	4177	4056	-0.651414	53	5.68823	0.178138	5.31839	0.19009	0.934453	0.0159369	0.0161231	0.857372	0.013551	0.0135502	0.933989	0.0154685	0.0159826	5.68811	0.178445	0.983831	0.0584613	0.0606633	-0.0163016	0.0595926	0.0612888	0.224549	0.125325	5.70329	0.277686	1.01025	0.129967
68	YPW1992	m156	2	HO	1	3	3	C	9	C09	1	1	1	1	5	3	15882	12122	4849	4536	-0.617168	53	5.69228	0.16866	5.27255	0.174738	0.925842	0.0164877	0.016704	0.861806	0.0112497	0.0112492	0.925319	0.0164512	0.0166199	5.69224	0.168533	0.9521	0.0577273	0.058363	-0.0490849	0.0609503	0.0612015	0.15675	0.129031	5.70743	0.209887	0.976785	0.133673
CTRL	YPW1002	CONTROL	1	PLATE.CONTROL	1	3	3	C	10	C10	1	1	1	1	5	3	13613	10319	4086	3800	-0.78083	53	5.7477	0.205924	5.22777	0.218434	0.912288	0.0191359	0.0194205	0.768984	0.0249324	0.0249272	0.911745	0.0190571	0.0189474	5.7472	0.205384	0.906547	0.0600326	0.0593019	-0.098112	0.0667703	0.0654853	0.0506005	0.145789	5.76238	0.103737	0.928746	0.150431
25	YPW1927	m66	1	FUSION	1	3	3	C	12	C12	1	1	1	1	5	3	12877	10493	4573	4466	-0.606759	52	5.67306	0.173418	5.16982	0.188738	0.911385	0.0172794	0.0176174	0.816125	0.0184098	0.0184078	0.910987	0.0169609	0.0173902	5.67313	0.17353	0.891345	0.0573672	0.059229	-0.124356	0.0613305	0.0629761	0.0125104	0.151263	5.68831	0.0656471	0.912714	0.155905
59	YPW1900	m90	1	HO	1	3	3	D	1	D01	1	1	1	1	5	4	16134	12360	5136	4792	-0.675954	53	5.71388	0.186759	5.02838	0.208389	0.881283	0.01882	0.0192193	0.715432	0.029026	0.0290178	0.880499	0.0181447	0.0186445	5.71393	0.186863	0.818368	0.0452817	0.0459295	-0.200444	0.0553548	0.0560355	-0.193745	0.144167	5.73542	-0.133239	0.838239	0.145618
CTRL	YPW1002	CONTROL	1	PLATE.CONTROL	1	3	3	D	2	D02	1	1	1	1	5	4	15441	11445	4512	4063	-0.709497	53	5.71392	0.184144	5.20682	0.20544	0.912228	0.0176518	0.0182834	0.77269	0.0244207	0.0244159	0.911526	0.017216	0.0178721	5.71362	0.183998	0.905851	0.0551866	0.0558838	-0.0988808	0.0606146	0.0617683	0.0488861	0.137622	5.73511	0.109392	0.931179	0.139073
31	YPW3163	TATA.26	1	FUSION	1	3	3	D	3	D03	1	1	1	1	5	4	7752	6011	2647	2530	-0.636481	52	5.65852	0.167207	4.62724	0.179323	0.81749	0.0184354	0.0185802	0.635833	0.0292818	0.0292735	0.81599	0.0181342	0.018034	5.65813	0.166511	0.707085	0.0243482	0.0237488	-0.351814	0.0362271	0.0353883	-0.623457	0.114561	5.67961	-0.562951	0.720015	0.116012
74	YPW3016	m156	1	ANCESTOR	1	3	3	D	4	D04	1	1	1	1	5	4	20264	15821	6422	6069	-0.689822	53	5.70979	0.182688	5.28624	0.189003	0.926395	0.0160345	0.0163543	0.843911	0.014446	0.014445	0.925987	0.0159636	0.0161956	5.70974	0.18296	0.954468	0.0572089	0.0568926	-0.0466007	0.05962	0.0596712	0.161972	0.125125	5.73123	0.222478	0.982829	0.126576
12	YPW1984	m75	1	FUSION	1	3	3	D	5	D05	1	1	1	1	5	4	8355	6585	2800	2721	-0.549304	53	5.68711	0.179182	4.99182	0.199554	0.878548	0.0202389	0.0199932	0.775827	0.0198165	0.0198139	0.87806	0.020275	0.0197632	5.68679	0.179382	0.800186	0.0530329	0.0520326	-0.226376	0.0636389	0.0618079	-0.252507	0.173209	5.70828	-0.192001	0.818924	0.17466
65	YPW1958	m63	2	HO	1	3	3	D	6	D06	1	1	1	1	5	4	18010	13890	5646	5353	-0.621812	53	5.68967	0.168736	4.94737	0.198418	0.868783	0.0209208	0.0208548	0.720376	0.0260836	0.0260777	0.868284	0.0203409	0.0204838	5.68933	0.168535	0.789344	0.0459656	0.0462282	-0.236553	0.0581678	0.0582281	-0.289267	0.159649	5.71082	-0.228761	0.807405	0.1611
CTRL	YPW1002	CONTROL	1	PLATE.CONTROL	1	3	3	D	7	D07	1	1	1	1	5	4	13362	9963	4080	3701	-0.686588	53	5.71659	0.185554	5.21063	0.198491	0.91166	0.017971	0.0185895	0.78668	0.0218627	0.0218592	0.910726	0.0177041	0.0182654	5.71656	0.185604	0.903319	0.0558003	0.0571438	-0.10168	0.0618248	0.0631362	0.0426317	0.141608	5.73805	0.103138	0.928489	0.143059
1	YPW1002	CONTROL	1	HO	1	3	3	D	8	D08	1	1	1	1	5	4	17791	14429	5962	5699	-0.657541	52	5.68716	0.163366	5.18584	0.17653	0.911489	0.0168163	0.0169611	0.830787	0.0141903	0.0141893	0.911049	0.016521	0.0168316	5.68706	0.163279	0.904337	0.0521396	0.0529194	-0.100553	0.0577221	0.0583791	0.0451526	0.130809	5.70854	0.105659	0.929571	0.13226
34	YPW3166	TATA.81	1	FUSION	1	3	3	D	9	D09	1	1	1	1	5	4	11417	9087	3741	3635	-0.613976	52	5.66502	0.166019	4.96211	0.186413	0.874488	0.0178487	0.0179129	0.72455	0.0264673	0.0264612	0.87325	0.0176013	0.0174749	5.66497	0.166085	0.800811	0.0412695	0.0415402	-0.22213	0.0514855	0.0514146	-0.25043	0.137994	5.68645	-0.189924	0.819587	0.139445
62	YPW1998	m154	1	HO	1	3	3	D	10	D10	1	1	1	1	5	4	21674	17643	6942	6533	-0.472043	52	5.66407	0.131827	5.23404	0.141412	0.922934	0.0150495	0.0155203	0.930899	-0.00140615	-0.00140615	0.922954	0.0150778	0.0155193	5.66409	0.131848	0.943811	0.052476	0.0534173	-0.0578292	0.0555889	0.0565834	0.138254	0.120301	5.68557	0.19876	0.971507	0.121753
54	YPW1899	m75	2	HO	1	3	3	D	11	D11	1	1	1	1	5	4	23925	19130	7953	7527	-0.55569	52	5.67341	0.154076	4.58265	0.208381	0.806943	0.0268156	0.0262691	0.635008	0.0303054	0.0302961	0.806352	0.0259991	0.0259328	5.67322	0.154058	0.678187	0.0361579	0.0360086	-0.388332	0.0532881	0.0526777	-0.773578	0.201836	5.6947	-0.713072	0.689315	0.203287
CTRL	YPW1002	CONTROL	1	PLATE.CONTROL	1	3	3	D	12	D12	1	1	1	1	5	4	16837	12908	5108	4864	-0.772929	53	5.72148	0.191253	5.20321	0.211988	0.910555	0.0186736	0.0191236	0.762782	0.0258278	0.025822	0.909547	0.0184276	0.0186463	5.72142	0.191298	0.899615	0.0577423	0.0578098	-0.105788	0.0640435	0.0641073	0.033411	0.144585	5.74291	0.093917	0.924554	0.146036
46	YPW2001	m184	3	HO	1	3	3	E	1	E01	2	1	1	1	6	1	20290	16345	6605	6205	-0.551554	52	5.69189	0.153413	5.19749	0.167433	0.912383	0.0158241	0.0163355	0.835979	0.0134231	0.0134223	0.911873	0.0157855	0.0162294	5.6919	0.153305	0.906953	0.0500264	0.0514689	-0.0976641	0.0554	0.0565763	0.0515983	0.126406	5.70678	0.110971	0.93186	0.131135
4	YPW1989	m142	1	FUSION	1	3	3	E	2	E02	2	1	1	1	6	1	14614	11597	5082	4953	-0.624699	53	5.67373	0.169856	5.42579	0.180165	0.955406	0.0158362	0.0155248	0.910437	0.00792573	0.00792557	0.955235	0.0156783	0.0154776	5.67382	0.169828	1.07132	0.070337	0.0692808	0.0688902	0.065437	0.0643399	0.390692	0.121219	5.6887	0.450065	1.10628	0.125947
52	YPW1960	m76	2	HO	1	3	3	E	3	E03	2	1	1	1	6	1	20860	15406	6272	5977	-0.797119	53	5.71642	0.201714	4.08679	0.290469	0.713595	0.0406128	0.0434894	0.326443	0.0677263	0.067623	0.710837	0.0398614	0.0420469	5.71564	0.201065	0.584314	0.0265189	0.0279081	-0.537317	0.0453332	0.0469207	-1.52051	0.330149	5.73052	-1.46113	0.589485	0.334878
CTRL	YPW1002	CONTROL	1	PLATE.CONTROL	1	3	3	E	4	E04	2	1	1	1	6	1	13832	10199	3836	3513	-0.754316	53	5.74049	0.202134	5.23717	0.210861	0.913824	0.0186665	0.0187571	0.764825	0.0259557	0.0259498	0.912828	0.0178726	0.0182576	5.74018	0.202719	0.910005	0.0579186	0.0576986	-0.0943051	0.063315	0.0634619	0.059065	0.140652	5.75506	0.118437	0.935099	0.145381
67	YPW1991	m156	1	HO	1	3	3	E	5	E05	2	1	1	1	6	1	11624	8893	3744	3458	-0.735793	53	5.70383	0.187195	5.33669	0.263134	0.930172	0.0233309	0.0353077	0.831	0.0173869	0.0173851	0.929704	0.0228311	0.0352048	5.70428	0.187452	0.967878	0.0823937	0.162066	-0.032649	0.0852753	0.146234	0.191038	0.346224	5.71916	0.25041	0.996512	0.350953
60	YPW1901	m90	2	HO	1	3	3	E	6	E06	2	1	1	1	6	1	12713	9443	3759	3489	-0.689373	53	5.70781	0.177722	5.02286	0.194563	0.879963	0.0180096	0.018594	0.725242	0.027107	0.0271003	0.87901	0.0175581	0.0181039	5.7077	0.17749	0.814678	0.0428503	0.0444105	-0.204962	0.0528228	0.0542839	-0.205393	0.141032	5.72258	-0.146021	0.83394	0.145761
16	YPW1974	m89	1	FUSION	1	3	3	E	7	E07	2	1	1	1	6	1	12742	10286	4464	4350	-0.574266	52	5.66898	0.155534	5.35167	0.163376	0.94311	0.0157817	0.0156649	0.917022	0.00460197	0.00460194	0.942907	0.0157668	0.0156511	5.66905	0.155517	1.01879	0.0639942	0.0636914	0.0186149	0.0629837	0.0621591	0.294282	0.122718	5.68393	0.353654	1.05054	0.127447
18	YPW1976	m90	1	FUSION	1	3	3	E	8	E08	2	1	1	1	6	1	14460	11526	4819	4707	-0.550481	52	5.66152	0.155917	5.30432	0.170306	0.936449	0.0158221	0.0158574	0.893748	0.00754222	0.00754207	0.93622	0.0157999	0.0158203	5.66155	0.155682	0.992349	0.0608426	0.0609993	-0.00768068	0.0615181	0.0611675	0.241994	0.12384	5.67643	0.301366	1.02248	0.128568
CTRL	YPW1002	CONTROL	1	PLATE.CONTROL	1	3	3	E	9	E09	2	1	1	1	6	1	13070	10001	3950	3684	-0.709283	53	5.71607	0.186905	5.20341	0.195092	0.91136	0.0177869	0.0179383	0.806859	0.018282	0.0182799	0.911078	0.017242	0.0176999	5.71618	0.187084	0.90443	0.0549269	0.055255	-0.100451	0.0607467	0.0611189	0.0453809	0.136551	5.73106	0.104753	0.929182	0.14128
6	YPW1969	m184	2	FUSION	1	3	3	E	10	E10	2	1	1	1	6	1	11389	9073	3860	3773	-0.702442	53	5.6975	0.183651	5.47643	0.186575	0.961821	0.01603	0.0159209	0.926861	0.006136	0.00613592	0.961656	0.0160185	0.0158907	5.69748	0.18377	1.10075	0.0750914	0.0746758	0.0959893	0.0686939	0.0675486	0.440901	0.12426	5.71236	0.500274	1.13751	0.128989
27	YPW1966	m156	1	FUSION	1	3	3	E	11	E11	2	1	1	1	6	1	18679	15262	6629	6485	-0.523521	52	5.66841	0.154936	5.4868	0.164011	0.967414	0.0159569	0.0161535	0.947849	0.00345147	0.00345146	0.967319	0.0159263	0.016146	5.6684	0.154875	1.12796	0.0783671	0.079121	0.12041	0.0693687	0.0699225	0.485187	0.125953	5.68328	0.544559	1.16639	0.130682
50	YPW1961	V	1	HO	1	3	3	E	12	E12	2	1	1	1	6	1	22693	18254	7851	7346	-0.649963	53	5.68823	0.170963	5.29682	0.180851	0.930561	0.015778	0.0163533	0.864389	0.0116332	0.0116327	0.930146	0.0157648	0.0162583	5.6883	0.170974	0.969497	0.0578444	0.0593088	-0.0309774	0.0597506	0.0610815	0.194491	0.126265	5.70318	0.253863	0.99823	0.130994
CTRL	YPW1002	CONTROL	1	PLATE.CONTROL	1	3	3	F	1	F01	2	1	1	1	6	2	21118	16355	6469	6024	-0.614282	53	5.69672	0.166782	5.1975	0.174141	0.911932	0.016519	0.0170715	0.867509	0.00779789	0.00779774	0.911749	0.0163823	0.0170329	5.69675	0.16694	0.906558	0.0522523	0.0536463	-0.0981005	0.0576477	0.0591262	0.050626	0.131882	5.7256	0.10877	0.93091	0.139082
26	YPW1928	m66	2	FUSION	1	3	3	F	2	F02	2	1	1	1	6	2	15146	12004	5551	5383	-0.634739	53	5.68564	0.175982	5.19203	0.188123	0.912624	0.0167516	0.0172591	0.814224	0.0189214	0.0189191	0.912209	0.0166753	0.0170034	5.6856	0.175813	0.895518	0.0569368	0.0584613	-0.119899	0.0608487	0.06191	0.0231106	0.147728	5.71445	0.0812543	0.919209	0.154929
55	YPW1956	m221	1	HO	1	3	3	F	3	F03	2	1	1	1	6	2	15211	12234	5004	4688	-0.437104	52	5.6643	0.13727	5.1849	0.146995	0.914248	0.0164603	0.0166005	0.906283	0.00140615	0.00140615	0.914218	0.0164313	0.0165996	5.66428	0.137298	0.914488	0.0537141	0.0535163	-0.0893908	0.0584591	0.0583898	0.069934	0.129046	5.69313	0.128078	0.939315	0.136247
2	YPW978	NULL	1	NULL	1	3	3	F	4	F04	2	1	1	1	6	2	20133	10318	3983	3837	-0.82202	53	5.73339	0.20176	3.25358	0.35443	0.564229	0.0607396	0.0701316	0.768063	-0.0355522	-0.0355372	0.565516	0.0602492	0.0698985	5.73462	0.202071	0.526914	0.0129477	0.0157985	-0.640717	0.0245049	0.0291003	-2.65692	0.582279	5.76347	-2.59877	0.528539	0.58948
56	YPW1894	m123	1	HO	1	3	3	F	5	F05	2	1	1	1	6	2	23219	17905	7172	6716	-0.726346	53	5.70438	0.177739	5.17949	0.194563	0.908551	0.0163442	0.0167048	0.78092	0.0223743	0.0223706	0.907791	0.0161261	0.0163361	5.70432	0.17754	0.894162	0.0496137	0.050013	-0.111868	0.0555756	0.0558473	0.0196796	0.126814	5.73317	0.0778233	0.917773	0.134015
CTRL	YPW1002	CONTROL	1	PLATE.CONTROL	1	3	3	F	6	F06	2	1	1	1	6	2	15298	11225	4325	4024	-0.731874	53	5.72391	0.184736	5.21728	0.194221	0.912344	0.0171373	0.0173113	0.80404	0.0189214	0.0189191	0.9115	0.0169358	0.0170472	5.72375	0.184766	0.905767	0.0535651	0.0540362	-0.0989733	0.059076	0.0593917	0.0486798	0.133099	5.7526	0.106823	0.930072	0.1403
69	YPW1993	REF	1	HO	1	3	3	F	7	F07	2	1	1	1	6	2	17017	12658	5148	4678	-0.690749	53	5.71733	0.187761	5.31121	0.192796	0.929825	0.0161625	0.0168016	0.851619	0.0136788	0.013678	0.929443	0.0162225	0.0166578	5.71745	0.188101	0.966925	0.0591803	0.0601594	-0.0336346	0.0611118	0.0622459	0.188999	0.128782	5.7463	0.247142	0.994891	0.135982
64	YPW1896	m63	1	HO	1	3	3	F	8	F08	2	1	1	1	6	2	20448	15876	6459	6033	-0.657806	53	5.69617	0.169208	4.96177	0.199453	0.870597	0.0208444	0.021309	0.70526	0.029026	0.0290178	0.869689	0.0202433	0.0208655	5.69595	0.169185	0.792542	0.0466648	0.0475037	-0.232509	0.058686	0.0596128	-0.278282	0.162261	5.7248	-0.220138	0.810069	0.169462
29	YPW1964	REF	1	FUSION	1	3	3	F	9	F09	2	1	1	1	6	2	10644	8202	3324	3199	-0.593142	52	5.68171	0.170828	5.41435	0.186295	0.951813	0.016037	0.0166579	0.909686	0.00741438	0.00741424	0.951572	0.0160229	0.0166199	5.68167	0.171043	1.05518	0.0694772	0.0720043	0.0537087	0.0657563	0.0679725	0.362044	0.129645	5.71052	0.420188	1.08843	0.136846
23	YPW1923	m63	1	FUSION	1	3	3	F	10	F10	2	1	1	1	6	2	13857	11027	4794	4677	-0.675447	52	5.67407	0.17791	5.30468	0.188756	0.933825	0.0168338	0.016594	0.873621	0.0106104	0.01061	0.933566	0.0168239	0.0165095	5.67391	0.177528	0.982232	0.0635559	0.0625254	-0.0179278	0.0645875	0.0632343	0.221241	0.1296	5.70276	0.279385	1.01111	0.1368
CTRL	YPW1002	CONTROL	1	PLATE.CONTROL	1	3	3	F	11	F11	2	1	1	1	6	2	15871	12164	4992	4698	-0.649386	53	5.71584	0.181617	5.21171	0.188218	0.911973	0.017557	0.0178132	0.842556	0.0121446	0.012144	0.911647	0.0174944	0.0177128	5.71583	0.181654	0.906234	0.0553562	0.0557996	-0.0984573	0.0611164	0.0614777	0.0498307	0.137285	5.74468	0.107974	0.930568	0.144485
37	YPW3169	TATA.129	1	FUSION	1	3	3	F	12	F12	2	1	1	1	6	2	12080	9439	4030	3938	-0.685117	52	5.67784	0.179326	5.20455	0.194703	0.917175	0.0168076	0.0165092	0.779245	0.0242928	0.024288	0.916447	0.0162542	0.0160441	5.67789	0.179301	0.921781	0.0536228	0.0532709	-0.0814481	0.0579965	0.0573677	0.0873658	0.126235	5.70674	0.145509	0.947044	0.133436
22	YPW1983	m154	2	FUSION	1	3	3	G	1	G01	2	1	1	1	6	3	15064	11786	5074	4935	-0.720397	52	5.68542	0.188776	5.50203	0.194567	0.96801	0.0155274	0.0154032	0.909139	0.0103547	0.0103544	0.967565	0.0155315	0.0153076	5.68518	0.188409	1.12917	0.0764744	0.075259	0.121484	0.0675197	0.0664194	0.487114	0.119575	5.70968	0.5459	1.16728	0.125902
13	YPW1985	m75	2	FUSION	1	3	3	G	2	G02	2	1	1	1	6	3	11470	9086	4016	3880	-0.642615	52	5.67159	0.179984	4.99436	0.194361	0.880628	0.0191687	0.0193071	0.770237	0.0212233	0.0212201	0.879957	0.0188801	0.0190185	5.67143	0.180027	0.805237	0.0503733	0.0510207	-0.220365	0.0598751	0.0601511	-0.235835	0.167032	5.69593	-0.177049	0.823731	0.173359
CTRL	YPW1002	CONTROL	1	PLATE.CONTROL	1	3	3	G	3	G03	2	1	1	1	6	3	16206	12222	5133	4893	-0.61163	53	5.70208	0.164301	5.19855	0.183971	0.911264	0.0183449	0.0185633	0.805561	0.0185377	0.0185356	0.910684	0.0184638	0.0183632	5.70201	0.164204	0.903186	0.058096	0.0575069	-0.101827	0.0644624	0.0635055	0.0423023	0.142554	5.72651	0.101089	0.927612	0.148881
39	YPW3171	m75.TATA.42	1	FUSION	1	3	3	G	4	G04	2	1	1	1	6	3	6383	4989	2141	2054	-0.683565	53	5.70846	0.196987	4.55904	0.228291	0.799392	0.0211451	0.0209796	0.550399	0.0436183	0.0435906	0.798572	0.0198501	0.0196868	5.70864	0.19783	0.667657	0.025855	0.0260475	-0.403981	0.0388537	0.0387242	-0.834419	0.155161	5.73314	-0.775633	0.677821	0.161488
70	YPW2550	TATA.26	1	HO	1	3	3	G	5	G05	2	1	1	1	6	3	20879	16126	6559	6157	-0.754355	53	5.7144	0.190415	4.21415	0.205013	0.739041	0.0204836	0.0212381	0.455382	0.0496394	0.0495987	0.737649	0.018931	0.0196541	5.71375	0.190269	0.604033	0.0154039	0.0157056	-0.504126	0.025541	0.0259839	-1.31083	0.150652	5.73825	-1.25205	0.610345	0.156979
5	YPW1968	m184	1	FUSION	1	3	3	G	6	G06	2	1	1	1	6	3	17399	13644	6069	5913	-0.706887	52	5.68889	0.178932	5.48024	0.184074	0.963525	0.0155677	0.0157786	0.900255	0.0111218	0.0111214	0.963155	0.0155279	0.0156772	5.68895	0.178951	1.10783	0.0741733	0.0745075	0.102405	0.0666984	0.0669765	0.452621	0.122535	5.71345	0.511408	1.14465	0.128862
38	YPW3170	TATA.129	2	FUSION	1	3	3	G	7	G07	2	1	1	1	6	3	14764	12100	5273	5165	-0.699257	52	5.6745	0.17568	5.21507	0.183441	0.917923	0.016045	0.0162178	0.846832	0.0125282	0.0125275	0.91758	0.0162336	0.0161003	5.67449	0.17568	0.925537	0.0539562	0.0539745	-0.0773813	0.0584609	0.0578668	0.0962277	0.126774	5.69899	0.155014	0.951316	0.133101
CTRL	YPW1002	CONTROL	1	PLATE.CONTROL	1	3	3	G	8	G08	2	1	1	1	6	3	16906	13101	5154	4804	-0.695822	53	5.72391	0.182399	5.21144	0.197147	0.911752	0.017659	0.0181826	0.782219	0.0226301	0.0226262	0.911184	0.0173879	0.0178339	5.72398	0.182429	0.904767	0.0547324	0.0556502	-0.100078	0.0608341	0.0615718	0.0462142	0.137413	5.74848	0.105001	0.929288	0.14374
48	YPW1902	m91	1	HO	1	3	3	G	9	G09	2	1	1	1	6	3	19827	15473	6325	5837	-0.527559	52	5.66446	0.143282	5.07089	0.163221	0.894665	0.0166917	0.0167064	0.820803	0.0130396	0.0130388	0.894444	0.0163203	0.0166168	5.66451	0.143398	0.855075	0.0454278	0.0460241	-0.156566	0.0529548	0.0536306	-0.0846927	0.129538	5.68901	-0.0259063	0.876588	0.135865
20	YPW1972	m153	1	FUSION	1	3	3	G	10	G10	2	1	1	1	6	3	17513	13474	5719	5543	-0.654759	53	5.68701	0.177518	5.50925	0.182548	0.968808	0.0153872	0.015556	0.934639	0.00600816	0.00600809	0.968697	0.0152836	0.015527	5.68699	0.177597	1.13476	0.0757455	0.0769852	0.126424	0.066772	0.0676054	0.49596	0.12124	5.71149	0.554746	1.17321	0.127567
9	YPW2002	V	1	FUSION	1	3	3	G	11	G11	2	1	1	1	6	3	22706	18311	7639	7204	-0.595469	52	5.6778	0.16029	5.26123	0.166628	0.926351	0.0151393	0.0154274	0.892238	0.00600816	0.00600809	0.926125	0.0150999	0.0154027	5.6778	0.160266	0.95496	0.0535743	0.0545443	-0.0460856	0.0563409	0.0570118	0.163053	0.119831	5.7023	0.221839	0.982521	0.126158
75	YPW1141	m156	2	ANCESTOR	1	3	3	G	12	G12	2	1	1	1	6	3	18050	14189	5557	5140	-0.698866	53	5.71482	0.18456	5.28002	0.186275	0.924907	0.0170419	0.0175298	0.848196	0.0134231	0.0134223	0.924597	0.0169048	0.0174021	5.71476	0.184534	0.949552	0.0593183	0.0603912	-0.0517652	0.062791	0.0636517	0.1511	0.134271	5.73926	0.209886	0.976785	0.140598
35	YPW3167	TATA.81	2	FUSION	1	3	3	H	2	H02	2	1	1	1	6	4	10049	7647	3282	3198	-0.569694	53	5.68296	0.163637	4.96831	0.178139	0.873663	0.0171652	0.0168388	0.790113	0.0147017	0.0147006	0.873353	0.0169652	0.0166942	5.68272	0.163586	0.801053	0.0398646	0.0391748	-0.221828	0.0499616	0.0487542	-0.249626	0.130032	5.70817	-0.193591	0.818417	0.135603
19	YPW1977	m90	2	FUSION	1	3	3	H	3	H03	2	1	1	1	6	4	14676	11636	5010	4856	-0.561125	52	5.66067	0.165978	5.3117	0.177483	0.938309	0.0164732	0.016652	0.87897	0.0104826	0.0104822	0.9378	0.0164604	0.0165793	5.66065	0.165921	0.998472	0.0641043	0.064577	-0.0015292	0.0641079	0.0643956	0.254349	0.129493	5.6861	0.310383	1.02721	0.135065
45	YPW2000	m184	2	HO	1	3	3	H	4	H04	2	1	1	1	6	4	16845	13245	5710	5374	-0.654542	52	5.68459	0.174629	5.22854	0.181451	0.919882	0.0155421	0.0159871	0.853752	0.0116332	0.0116327	0.919452	0.0156779	0.0158885	5.68451	0.174476	0.931814	0.0527382	0.053312	-0.0706218	0.0567572	0.0571333	0.110864	0.123398	5.70997	0.166899	0.956714	0.12897
CTRL	YPW1002	CONTROL	1	PLATE.CONTROL	1	3	3	H	5	H05	2	1	1	1	6	4	14627	11341	4399	4141	-0.777918	53	5.72055	0.195565	5.20373	0.20925	0.912102	0.0189716	0.0189393	0.787035	0.0218627	0.0218592	0.911424	0.0184236	0.0185943	5.72057	0.196099	0.905526	0.0585759	0.0576925	-0.0992391	0.0643461	0.0639753	0.0480868	0.142189	5.74602	0.104122	0.928911	0.147761
42	YPW1895	m131	1	HO	1	3	3	H	6	H06	2	1	1	1	6	4	22389	17624	7314	6841	-0.531144	53	5.68197	0.155453	5.12975	0.183319	0.90325	0.0201024	0.0205557	0.813903	0.0157246	0.0157233	0.902798	0.0199835	0.0204388	5.68183	0.15533	0.879059	0.059697	0.0588397	-0.128904	0.067537	0.0673229	-0.0193703	0.155137	5.70728	0.0366646	0.900918	0.160708
61	YPW1996	m153	1	HO	1	3	3	H	7	H07	2	1	1	1	6	4	24806	19563	8313	7873	-0.634585	52	5.69577	0.17309	5.27173	0.174979	0.925675	0.0151395	0.0155474	0.871066	0.00958767	0.00958738	0.925424	0.0150832	0.0154793	5.69572	0.173006	0.952468	0.0534353	0.0543135	-0.0486983	0.0561236	0.057013	0.157564	0.11998	5.72117	0.213598	0.978559	0.125552
15	YPW1962	m123	1	FUSION	1	3	3	H	8	H08	2	1	1	1	6	4	13782	10255	4417	4218	-0.593118	52	5.67128	0.1701	5.43061	0.175284	0.956978	0.0154904	0.0151463	0.923629	0.00588033	0.00588026	0.956632	0.0154376	0.0151197	5.67138	0.170034	1.07759	0.0696723	0.0679503	0.0747303	0.0647716	0.0629898	0.401612	0.117599	5.69683	0.457647	1.1109	0.123171
51	YPW1953	m76	1	HO	1	3	3	H	9	H09	2	1	1	1	6	4	19125	14739	6064	5631	-0.54998	52	5.67696	0.156885	5.19583	0.169274	0.91469	0.0162659	0.016989	0.856632	0.0102269	0.0102265	0.914418	0.0165485	0.0169282	5.67688	0.156812	0.915137	0.0539363	0.0544899	-0.0886812	0.0587724	0.0594765	0.0714982	0.131189	5.70233	0.127533	0.939076	0.13676
CTRL	YPW1002	CONTROL	1	PLATE.CONTROL	1	3	3	H	10	H10	2	1	1	1	6	4	14647	10986	4573	4227	-0.550305	52	5.67764	0.154163	5.17591	0.163581	0.911499	0.0168549	0.0176091	0.891177	0.0035793	0.00357929	0.911367	0.0168042	0.0176024	5.67772	0.15432	0.905345	0.0536344	0.0553114	-0.0994395	0.0590107	0.0610021	0.0476395	0.136382	5.70317	0.103674	0.928719	0.141953
32	YPW3164	TATA.26	2	FUSION	1	3	3	H	11	H11	2	1	1	1	6	4	10122	7979	3722	3551	-0.582702	52	5.66117	0.170095	4.61655	0.179559	0.815252	0.0176718	0.0180668	0.648002	0.0267232	0.0267168	0.814304	0.0170779	0.0175918	5.66114	0.170138	0.70486	0.0222861	0.0229895	-0.355142	0.0334321	0.0343254	-0.634248	0.112101	5.6866	-0.578213	0.716679	0.117673
17	YPW1975	m89	2	FUSION	1	3	3	H	12	H12	2	1	1	1	6	4	16005	12586	5484	5314	-0.605399	52	5.66848	0.167838	5.35005	0.181776	0.943033	0.0161209	0.0162279	0.885062	0.0102269	0.0102265	0.942717	0.0161477	0.0161553	5.66847	0.167727	1.01802	0.0652886	0.0654892	0.0178611	0.0641992	0.064027	0.292802	0.126369	5.69392	0.348836	1.04789	0.13194
CTRL	YPW1002	CONTROL	1	PLATE.CONTROL	1	4	4	A	1	A01	1	1	1	1	7	1	15729	13124	5613	5294	-0.467934	49	5.48915	0.17742	5.20402	0.191099	0.947668	0.0192775	0.0190991	0.871179	0.0139346	0.0139337	0.947097	0.0191548	0.0189766	5.48915	0.177258	1.03608	0.080507	0.0788442	0.0354437	0.077481	0.0759846	0.327053	0.147016	5.74556	0.089668	0.922753	0.143355
58	YPW1893	m89	2	HO	1	4	4	A	2	A02	1	1	1	1	7	1	20815	17488	7885	7377	-0.456481	49	5.48337	0.193924	5.07624	0.212373	0.927328	0.0192002	0.0194406	0.785004	0.0259557	0.0259498	0.926525	0.0185268	0.0189695	5.48305	0.193606	0.956386	0.0664412	0.0671882	-0.0445936	0.0694371	0.0700653	0.16618	0.147148	5.73946	-0.0712041	0.8599	0.143486
3	YPW1980	m131	1	FUSION	1	4	4	A	3	A03	1	1	1	1	7	1	13381	11412	5269	5130	-0.342836	48	5.44106	0.168974	5.3792	0.184199	0.988909	0.0171605	0.0174467	0.978476	0.00191748	0.00191748	0.988882	0.0172362	0.0174444	5.44105	0.168973	1.24334	0.0996596	0.100773	0.217798	0.0800806	0.0809472	0.653806	0.135529	5.69746	0.416421	1.08621	0.131868
77	YPW1004	REF	2	ANCESTOR	1	4	4	A	4	A04	1	1	1	1	7	1	12872	10559	4428	4109	-0.638562	50	5.50426	0.206802	5.23561	0.2149	0.953017	0.01809	0.0179464	0.851684	0.0184098	0.0184078	0.952534	0.018015	0.0176682	5.50418	0.20692	1.05937	0.0783825	0.0768254	0.0576767	0.0744919	0.0723702	0.369569	0.137289	5.76059	0.132185	0.941124	0.133627
63	YPW1999	m154	2	HO	1	4	4	A	5	A05	1	1	1	1	7	1	21485	18455	8379	7998	-0.501799	49	5.46474	0.186148	5.26398	0.192658	0.964374	0.0174554	0.0174628	0.914775	0.0090763	0.00907605	0.964103	0.0173919	0.0174005	5.46475	0.186116	1.11236	0.0835667	0.082728	0.106481	0.0750444	0.0742776	0.460034	0.13505	5.72116	0.22265	0.982912	0.131388
CTRL	YPW1002	CONTROL	1	PLATE.CONTROL	1	4	4	A	6	A06	1	1	1	1	7	1	15996	13243	5518	5179	-0.439393	49	5.47439	0.181023	5.19831	0.197064	0.95021	0.0189529	0.0193825	0.900523	0.0090763	0.00907605	0.949825	0.0190253	0.0193285	5.47412	0.181313	1.04764	0.0817045	0.0813414	0.0465436	0.0781186	0.0778519	0.348387	0.148471	5.73053	0.111002	0.931874	0.144809
40	YPW3172	m75.TATA.42	2	FUSION	1	4	4	A	7	A07	1	1	1	1	7	1	3848	3053	1574	1505	0.129357	47	5.38247	0.132229	4.48841	0.154651	0.832706	0.0195246	0.0198681	0.739121	0.0173869	0.0173851	0.832379	0.0191653	0.019746	5.38213	0.132139	0.718459	0.0329094	0.0339722	-0.330647	0.0456305	0.0469148	-0.570042	0.155354	5.63854	-0.807427	0.67225	0.151692
72	YPW2651	TATA.129	1	HO	1	4	4	A	8	A08	1	1	1	1	7	1	16847	14574	6161	5740	-0.439592	49	5.45362	0.168397	4.84946	0.184989	0.88891	0.0182171	0.0190962	0.776653	0.0205838	0.0205809	0.888168	0.0179233	0.0188573	5.45358	0.168168	0.838058	0.047542	0.0494475	-0.176668	0.0565933	0.0588359	-0.133775	0.146175	5.70999	-0.37116	0.766576	0.142514
7	YPW1970	m160	1	FUSION	1	4	4	A	9	A09	1	1	1	1	7	1	16039	13872	6348	6197	-0.285952	48	5.44639	0.176409	5.42373	0.183492	0.995554	0.0172047	0.0167088	0.962135	0.006136	0.00613592	0.99548	0.0171716	0.0166822	5.44634	0.17637	1.28271	0.105228	0.102387	0.248973	0.0819334	0.0793353	0.705402	0.130775	5.70275	0.468017	1.11727	0.127114
53	YPW1898	m75	1	HO	1	4	4	A	10	A10	1	1	1	1	7	1	14106	11915	4855	4570	-0.0434862	47	5.39984	0.118707	4.44168	0.188367	0.82141	0.030539	0.0313225	0.791037	0.00562466	0.0056246	0.821343	0.0305552	0.0313167	5.3998	0.118646	0.700378	0.047631	0.0495082	-0.356136	0.0682454	0.0694348	-0.656345	0.246806	5.6562	-0.89373	0.657989	0.243145
CTRL	YPW1002	CONTROL	1	PLATE.CONTROL	1	4	4	A	11	A11	1	1	1	1	7	1	15346	12790	5217	4872	-0.634583	50	5.50171	0.204451	5.21711	0.223286	0.950676	0.0193818	0.019838	0.824764	0.0228859	0.0228819	0.94974	0.0190957	0.0194488	5.50126	0.203921	1.04728	0.0811699	0.0825736	0.0461927	0.0779736	0.0786709	0.347716	0.150821	5.75767	0.110331	0.931584	0.14716
8	YPW1988	m91	1	FUSION	1	4	4	A	12	A12	1	1	1	1	7	1	14748	12676	5974	5822	-0.533877	49	5.4457	0.183014	5.38398	0.194994	0.988616	0.017066	0.0168811	0.933619	0.0100991	0.0100987	0.988248	0.0168968	0.0168032	5.44575	0.183005	1.23966	0.0969455	0.0970387	0.214838	0.0788276	0.0779906	0.648851	0.131155	5.70216	0.411467	1.08332	0.127493
66	YPW1897	m66	1	HO	1	4	4	B	1	B01	1	1	1	1	7	2	19718	16832	7371	6977	-0.420623	48	5.44871	0.174965	4.77794	0.22449	0.87645	0.0276676	0.0280648	0.706444	0.0312011	0.0311909	0.875514	0.0273947	0.0276647	5.44848	0.174994	0.806187	0.0654164	0.0665354	-0.21544	0.0813019	0.0813234	-0.232729	0.217149	5.69317	-0.471144	0.741191	0.214044
43	YPW1949	m142	1	HO	1	4	4	B	2	B02	1	1	1	1	7	2	22364	19748	8779	8317	-0.443842	48	5.45065	0.169537	5.16557	0.18203	0.947265	0.0177622	0.0178216	0.903368	0.00805357	0.0080534	0.946997	0.0177353	0.0177818	5.45053	0.169477	1.03566	0.0742154	0.0738052	0.0350383	0.0717395	0.0712153	0.326269	0.137728	5.69522	0.0878546	0.921987	0.134623
CTRL	YPW1002	CONTROL	1	PLATE.CONTROL	1	4	4	B	3	B03	1	1	1	1	7	2	14050	11518	4757	4453	-0.577977	50	5.51444	0.202944	5.22714	0.219488	0.950702	0.0185459	0.019042	0.849887	0.018282	0.0182799	0.950168	0.0183436	0.0187873	5.51422	0.203231	1.04911	0.0796142	0.0793018	0.0479432	0.0750727	0.0758271	0.351062	0.144361	5.75891	0.112647	0.932585	0.141257
21	YPW1982	m154	1	FUSION	1	4	4	B	4	B04	1	1	1	1	7	2	13781	11862	5239	5122	-0.0736899	48	5.41081	0.138314	5.45689	0.151927	1.00683	0.0168976	0.0166453	1.06148	-0.0100991	-0.0100987	1.00718	0.0167572	0.0165953	5.41077	0.138414	1.3577	0.112572	0.11093	0.305792	0.0830321	0.0815229	0.796873	0.129301	5.65546	0.558458	1.17572	0.126197
73	YPW2653	m75.TATA.42	1	HO	1	4	4	B	5	B05	1	1	1	1	7	2	21243	17877	7938	7540	-0.492788	49	5.47681	0.189152	3.96572	0.256196	0.724248	0.0345869	0.0369998	0.355434	0.067341	0.0672395	0.722001	0.0330081	0.0354276	5.47634	0.189429	0.592026	0.0239294	0.0252249	-0.524205	0.0403684	0.0421442	-1.4332	0.27346	5.72103	-1.67162	0.572459	0.270356
76	YPW1002	REF	1	ANCESTOR	1	4	4	B	6	B06	1	1	1	1	7	2	19609	16497	7476	7009	-0.49146	49	5.45799	0.180845	5.18428	0.193785	0.950015	0.0176749	0.0178134	0.876751	0.0134231	0.0134223	0.949521	0.0176299	0.0176826	5.45788	0.180682	1.04634	0.0754145	0.075301	0.0452999	0.0721858	0.0717066	0.346007	0.137773	5.70257	0.107593	0.930403	0.134668
14	YPW1978	m221	1	FUSION	1	4	4	B	7	B07	1	1	1	1	7	2	13417	11139	4976	4831	-0.217136	48	5.43683	0.155775	5.46943	0.165865	1.00452	0.0150509	0.0153693	1.02259	-0.00332364	-0.00332363	1.00466	0.0149038	0.0153621	5.43691	0.155729	1.34098	0.0978606	0.100996	0.293401	0.0729388	0.0750347	0.777191	0.120063	5.6816	0.538776	1.16254	0.116958
CTRL	YPW1002	CONTROL	1	PLATE.CONTROL	1	4	4	B	8	B08	1	1	1	1	7	2	17977	14851	6486	6114	-0.491752	50	5.51543	0.20253	5.23702	0.214707	0.951201	0.0182772	0.0188046	0.844726	0.019305	0.0193026	0.950819	0.0180649	0.0185315	5.51536	0.202481	1.05192	0.0780834	0.0798699	0.0506145	0.0737935	0.0755212	0.356157	0.144656	5.76005	0.117742	0.934796	0.141552
47	YPW1954	m160	1	HO	1	4	4	B	9	B09	1	1	1	1	7	2	14569	12095	5088	4717	-0.48448	49	5.47494	0.191042	5.14889	0.206419	0.942276	0.0184859	0.0188379	0.860385	0.0149574	0.0149563	0.941939	0.0181975	0.0186806	5.47506	0.191073	1.01488	0.0737509	0.0737343	0.0147686	0.0724417	0.0729362	0.286718	0.143147	5.71975	0.048303	0.905614	0.140042
2	YPW978	NULL	1	NULL	1	4	4	B	10	B10	1	1	1	1	7	2	19368	10510	4438	4267	-0.482053	49	5.47288	0.185189	3.22246	0.358787	0.586504	0.0666825	0.0727463	0.95154	-0.066699	-0.0666003	0.587983	0.0659669	0.0720907	5.47263	0.187893	0.532126	0.0166171	0.018132	-0.630876	0.0312959	0.0332419	-2.48122	0.560607	5.71732	-2.71964	0.525265	0.557502
30	YPW1965	REF	2	FUSION	1	4	4	B	11	B11	1	1	1	1	7	2	17555	15174	6551	6380	-0.339182	48	5.44718	0.171728	5.4385	0.177014	0.998572	0.0160503	0.0162165	0.994394	0.000766991	0.00076699	0.998591	0.0160518	0.0162161	5.44719	0.171715	1.30199	0.100704	0.101696	0.263896	0.0773104	0.0777763	0.729736	0.12677	5.69188	0.491321	1.13182	0.123666
44	YPW1952	m184	1	HO	1	4	4	B	12	B12	1	1	1	1	7	2	20110	16735	7173	6817	-0.452249	48	5.44136	0.170975	4.04214	0.279838	0.741647	0.0431723	0.04604	0.454106	0.0528436	0.0527945	0.739853	0.0430611	0.0453848	5.4414	0.170392	0.605846	0.0354792	0.0374299	-0.50113	0.0589647	0.0603901	-1.2936	0.352901	5.68609	-1.53201	0.583347	0.349796
10	YPW1986	m76	1	FUSION	1	4	4	C	1	C01	1	1	1	1	7	3	8736	7396	3375	3278	-0.395201	49	5.43527	0.175073	4.63008	0.236086	0.850756	0.0311986	0.0323642	0.698555	0.0280025	0.0279951	0.849821	0.0311525	0.0320731	5.43521	0.175634	0.750414	0.0613665	0.063058	-0.28713	0.0817944	0.0825819	-0.43365	0.251596	5.68731	-0.682366	0.695225	0.248066
28	YPW1967	m156	2	FUSION	1	4	4	C	2	C02	1	1	1	1	7	3	19172	16442	7696	7515	-0.348061	48	5.43994	0.169455	5.50633	0.18071	1.01204	0.0167533	0.0165233	0.991874	0.00370714	0.00370712	1.01188	0.0167693	0.016514	5.43991	0.169493	1.38982	0.116686	0.115095	0.329176	0.083973	0.0823806	0.833631	0.129314	5.69202	0.584915	1.19384	0.125785
71	YPW2605	TATA.81	1	HO	1	4	4	C	3	C03	1	1	1	1	7	3	18807	15821	6387	5915	-0.316358	48	5.43871	0.150397	4.55025	0.169119	0.836816	0.019378	0.0199972	0.701912	0.0248044	0.0247994	0.836073	0.0187196	0.0197066	5.43862	0.150259	0.724867	0.0329643	0.0344761	-0.321767	0.04546	0.0473496	-0.54116	0.153169	5.69072	-0.789876	0.675303	0.14964
49	YPW1903	m91	2	HO	1	4	4	C	4	C04	1	1	1	1	7	3	18246	15503	6560	6217	-0.46717	49	5.48499	0.193683	5.11189	0.215463	0.933215	0.019269	0.0195559	0.792252	0.0256998	0.0256942	0.932438	0.0186276	0.0191022	5.48472	0.193527	0.977993	0.070011	0.0710396	-0.0222526	0.0715439	0.0723546	0.212416	0.148553	5.73682	-0.0362999	0.872692	0.145023
CTRL	YPW1002	CONTROL	1	PLATE.CONTROL	1	4	4	C	5	C05	1	1	1	1	7	3	11350	9565	3831	3542	-0.46561	48	5.44121	0.153074	5.16532	0.166656	0.950136	0.0190044	0.0192234	0.907706	0.00779789	0.00779774	0.950016	0.0191141	0.019193	5.4411	0.152837	1.04846	0.082314	0.0809884	0.0473236	0.0784258	0.0774116	0.349878	0.147606	5.6932	0.101162	0.927643	0.144076
11	YPW1987	m76	2	FUSION	1	4	4	C	6	C06	1	1	1	1	7	3	9348	7678	3475	3374	-0.298686	49	5.4492	0.176263	4.64187	0.2352	0.850908	0.031652	0.0310936	0.693437	0.028898	0.02889	0.84982	0.030983	0.0307724	5.44906	0.17607	0.750413	0.0600561	0.060171	-0.287131	0.0803932	0.0790717	-0.433653	0.240078	5.70116	-0.68237	0.695225	0.236548
57	YPW1892	m89	1	HO	1	4	4	C	7	C07	1	1	1	1	7	3	21839	18533	8235	7853	-0.553905	49	5.48845	0.20224	5.07807	0.220651	0.927487	0.0199515	0.0196806	0.778711	0.027107	0.0271003	0.926823	0.0189863	0.0191509	5.48838	0.202304	0.957449	0.0680952	0.0680349	-0.043483	0.0708961	0.0708469	0.168505	0.148656	5.74048	-0.080211	0.856671	0.145126
24	YPW1924	m63	2	FUSION	1	4	4	C	8	C08	1	1	1	1	7	3	15383	13331	6200	6026	-0.417303	48	5.45321	0.176799	5.30792	0.192347	0.973797	0.0179055	0.0178217	0.89502	0.014446	0.014445	0.973406	0.01775	0.0176782	5.45318	0.176512	1.15859	0.0914506	0.0909227	0.1472	0.0788078	0.0781222	0.532789	0.138012	5.70528	0.284073	1.01352	0.134482
68	YPW1992	m156	2	HO	1	4	4	C	9	C09	1	1	1	1	7	3	20263	16902	7171	6721	-0.571345	49	5.48386	0.199721	5.28801	0.211163	0.966117	0.017058	0.0176552	0.879185	0.0158525	0.0158511	0.965589	0.0170153	0.0174553	5.48382	0.199647	1.11952	0.0826012	0.0835913	0.112897	0.0737981	0.0747456	0.471656	0.134882	5.73592	0.222939	0.983052	0.131353
CTRL	YPW1002	CONTROL	1	PLATE.CONTROL	1	4	4	C	10	C10	1	1	1	1	7	3	13407	11181	4420	4086	0.0362802	48	5.43382	0.129795	5.15358	0.152308	0.947549	0.0188799	0.0187652	0.992005	-0.00818141	-0.00818123	0.947713	0.0185712	0.0187398	5.43395	0.129665	1.03867	0.0790543	0.0774309	0.0379385	0.0755408	0.0748623	0.331867	0.143687	5.68605	0.0831506	0.920005	0.140157
25	YPW1927	m66	1	FUSION	1	4	4	C	12	C12	1	1	1	1	7	3	13228	11180	5083	4938	-0.487471	48	5.43865	0.180512	5.17563	0.199969	0.951734	0.0191286	0.0186645	0.893473	0.0124003	0.0123997	0.95135	0.018921	0.0185593	5.43862	0.180414	1.05255	0.0882731	0.0868517	0.0348399	0.0804098	0.0785986	0.357294	0.157123	5.69072	0.108578	0.930828	0.153593
59	YPW1900	m90	1	HO	1	4	4	D	1	D01	1	1	1	1	7	4	17841	14920	6501	6024	-0.286388	48	5.43402	0.158429	4.97078	0.181386	0.91448	0.0188334	0.0189213	0.842928	0.0131674	0.0131667	0.914205	0.0187342	0.0188301	5.43404	0.158385	0.914446	0.060484	0.0608679	-0.0894366	0.0663061	0.0662387	0.0698331	0.146788	5.69244	-0.171514	0.825529	0.140068
CTRL	YPW1002	CONTROL	1	PLATE.CONTROL	1	4	4	D	2	D02	1	1	1	1	7	4	19256	16079	7104	6688	-0.439226	49	5.46928	0.178822	5.19196	0.198465	0.950257	0.0198979	0.0197634	0.843974	0.0194329	0.0194304	0.949274	0.0196125	0.0195246	5.46921	0.178625	1.04529	0.0836914	0.0824587	0.0442898	0.0799447	0.0787855	0.344073	0.151161	5.72761	0.102726	0.928312	0.14444
31	YPW3163	TATA.26	1	FUSION	1	4	4	D	3	D03	1	1	1	1	7	4	1273	631	286	253	-0.668884	49	5.45872	0.18588	4.66855	0.194742	0.853384	0.0210548	0.019816	0.634965	0.0370882	0.0370712	0.852567	0.0194363	0.0189036	5.45875	0.184719	0.763333	0.0343187	0.0339059	-0.271159	0.0472536	0.0462143	-0.38339	0.128651	5.71715	-0.624737	0.706819	0.12193
74	YPW3016	m156	1	ANCESTOR	1	4	4	D	4	D04	1	1	1	1	7	4	17279	14524	6222	5850	-0.5129	49	5.4641	0.178352	5.26528	0.188408	0.964452	0.017007	0.017283	0.912064	0.00958767	0.00958738	0.964092	0.0170236	0.0172177	5.46409	0.178384	1.11231	0.0812298	0.0819254	0.106436	0.0728473	0.0735362	0.459954	0.13375	5.7225	0.218606	0.980963	0.12703
12	YPW1984	m75	1	FUSION	1	4	4	D	5	D05	1	1	1	1	7	4	9467	8042	3689	3597	-0.544695	49	5.45201	0.191	5.01412	0.204886	0.919536	0.02035	0.0203719	0.822868	0.0195607	0.0195583	0.919082	0.0200544	0.020119	5.45191	0.190941	0.927966	0.0731566	0.0729384	-0.0843985	0.075823	0.0751685	0.101918	0.170344	5.71031	-0.139429	0.83615	0.163623
65	YPW1958	m63	2	HO	1	4	4	D	6	D06	1	1	1	1	7	4	19821	16776	7566	7234	-0.454867	49	5.48878	0.192845	4.9817	0.221725	0.90876	0.0223346	0.022023	0.745931	0.0296657	0.029657	0.907808	0.0215156	0.0214728	5.48889	0.192786	0.894214	0.066222	0.0662317	-0.111811	0.0741381	0.0734687	0.0198098	0.167917	5.74729	-0.221537	0.809635	0.161196
CTRL	YPW1002	CONTROL	1	PLATE.CONTROL	1	4	4	D	7	D07	1	1	1	1	7	4	17158	14370	6250	5788	-0.538608	50	5.49947	0.200439	5.21883	0.213818	0.950889	0.0194312	0.0195576	0.832062	0.0216069	0.0216036	0.950301	0.0190591	0.0192159	5.4994	0.200447	1.04968	0.0824589	0.0813181	0.0484883	0.0784087	0.0776209	0.352102	0.147878	5.75781	0.110755	0.931767	0.141157
1	YPW1002	CONTROL	1	HO	1	4	4	D	8	D08	1	1	1	1	7	4	18769	15813	6838	6431	-0.463918	49	5.47955	0.188076	5.18807	0.204666	0.948385	0.0181654	0.0180166	0.832792	0.0210954	0.0210922	0.947762	0.0175202	0.0177009	5.47965	0.187807	1.03888	0.073632	0.0743854	0.0381387	0.0707729	0.0713265	0.332253	0.137982	5.73806	0.0909055	0.923277	0.131262
34	YPW3166	TATA.81	1	FUSION	1	4	4	D	9	D09	1	1	1	1	7	4	10121	8664	3768	3667	-0.44494	49	5.45258	0.18233	4.96883	0.198752	0.911365	0.0188301	0.0183446	0.792854	0.0217348	0.0217314	0.910648	0.0183997	0.0180132	5.45283	0.182277	0.903073	0.0576996	0.057137	-0.101952	0.0644204	0.0627558	0.0420218	0.141677	5.71123	-0.199325	0.816595	0.134957
62	YPW1998	m154	1	HO	1	4	4	D	10	D10	1	1	1	1	7	4	18504	15741	6757	6399	-0.370519	48	5.44964	0.163115	5.24863	0.173672	0.963863	0.0171566	0.0170507	0.930424	0.006136	0.00613592	0.963692	0.0171334	0.017027	5.44967	0.163068	1.11039	0.0815884	0.0806984	0.104714	0.0734039	0.0726031	0.456824	0.13216	5.70807	0.215477	0.979459	0.12544
54	YPW1899	m75	2	HO	1	4	4	D	11	D11	1	1	1	1	7	4	17962	15185	6575	6156	-0.274863	48	5.43858	0.151174	4.57191	0.201902	0.8395	0.0278024	0.0281681	0.701816	0.0253161	0.0253107	0.838724	0.0273778	0.027954	5.43867	0.15111	0.729581	0.0494708	0.0503095	-0.315284	0.0677303	0.0680908	-0.520429	0.218928	5.69708	-0.761776	0.680305	0.212207
CTRL	YPW1002	CONTROL	1	PLATE.CONTROL	1	4	4	D	12	D12	1	1	1	1	7	4	15543	13389	5536	5197	-0.48533	49	5.47766	0.184127	5.19774	0.194267	0.949315	0.0197147	0.019693	0.894696	0.00997121	0.00997088	0.948867	0.0195938	0.0196294	5.47759	0.184133	1.04355	0.0838425	0.0821801	0.0426303	0.0803136	0.078862	0.34089	0.15113	5.736	0.0995433	0.926951	0.14441
46	YPW2001	m184	3	HO	1	4	4	E	1	E01	2	1	1	1	8	1	18986	16294	7411	6943	-0.33401	49	5.4573	0.156601	5.19554	0.170938	0.95122	0.0170571	0.0173914	0.911455	0.00728654	0.00728641	0.95102	0.017056	0.0173608	5.45734	0.156672	1.05278	0.0737492	0.0743405	0.0514389	0.0697502	0.0705976	0.357727	0.134431	5.71683	0.114604	0.933433	0.127564
4	YPW1989	m142	1	FUSION	1	4	4	E	2	E02	2	1	1	1	8	1	17219	14647	6512	6362	-0.380932	49	5.45607	0.179406	5.43955	0.186533	0.997272	0.0168276	0.016457	0.984717	0.00230098	0.00230097	0.997201	0.0169118	0.0164529	5.45606	0.179427	1.29332	0.103988	0.102069	0.257213	0.0807417	0.078578	0.718866	0.128625	5.71554	0.475743	1.12206	0.121758
52	YPW1960	m76	2	HO	1	4	4	E	3	E03	2	1	1	1	8	1	17248	14569	6313	6068	-0.353094	48	5.43575	0.154248	4.02082	0.271886	0.737485	0.0431434	0.0457615	0.424452	0.0575878	0.0575243	0.735933	0.0432048	0.0450823	5.43586	0.154591	0.602643	0.0342913	0.0363925	-0.50643	0.0573355	0.0590524	-1.32426	0.353802	5.69535	-1.56738	0.580443	0.346935
CTRL	YPW1002	CONTROL	1	PLATE.CONTROL	1	4	4	E	4	E04	2	1	1	1	8	1	15930	13175	5770	5400	-0.514552	49	5.49397	0.201245	5.21695	0.212216	0.951898	0.0197195	0.019656	0.85216	0.0181541	0.0181521	0.951165	0.019314	0.0194179	5.49396	0.201637	1.05341	0.0837378	0.0829533	0.052034	0.0793947	0.0787801	0.35886	0.149835	5.75345	0.115737	0.933925	0.142969
67	YPW1991	m156	1	HO	1	4	4	E	5	E05	2	1	1	1	8	1	11589	9645	4255	3957	-0.529184	49	5.48663	0.19718	5.35974	0.283563	0.971826	0.0249796	0.0371438	0.878536	0.0170033	0.0170016	0.971497	0.024821	0.0370414	5.48701	0.197242	1.14882	0.123009	0.23731	0.138736	0.108103	0.176543	0.517856	0.365633	5.7465	0.274733	1.00874	0.358766
60	YPW1901	m90	2	HO	1	4	4	E	6	E06	2	1	1	1	8	1	15653	12832	5838	5437	-0.454939	49	5.47086	0.193861	5.02122	0.223335	0.918367	0.0203293	0.0206978	0.75607	0.0296657	0.029657	0.916933	0.0196258	0.0200868	5.47081	0.193668	0.923387	0.0654758	0.0661026	-0.0797066	0.0707529	0.0712886	0.0911658	0.156048	5.7303	-0.151957	0.831963	0.149181
16	YPW1974	m89	1	FUSION	1	4	4	E	7	E07	2	1	1	1	8	1	14122	12218	5507	5390	-0.492154	49	5.45983	0.188372	5.36625	0.200754	0.983383	0.0171078	0.0169773	0.921962	0.0112497	0.0112492	0.983037	0.0172479	0.0168785	5.45976	0.188201	1.21012	0.0943338	0.0936954	0.190718	0.0788138	0.0770847	0.608103	0.131903	5.71925	0.36498	1.05681	0.125036
18	YPW1976	m90	1	FUSION	1	4	4	E	8	E08	2	1	1	1	8	1	17897	15393	7000	6852	-0.3789	49	5.4484	0.18176	5.32066	0.196859	0.976977	0.0179638	0.0177135	0.905932	0.0130396	0.0130388	0.976605	0.0179469	0.0175891	5.44838	0.181641	1.17527	0.0950547	0.0927669	0.161501	0.0805001	0.0785875	0.557806	0.137332	5.70786	0.314683	1.02949	0.130466
CTRL	YPW1002	CONTROL	1	PLATE.CONTROL	1	4	4	E	9	E09	2	1	1	1	8	1	10576	8577	3519	3309	-0.466812	49	5.48892	0.190552	5.21035	0.203921	0.950322	0.0196848	0.0198085	0.887872	0.0113775	0.011377	0.950078	0.0198816	0.0197199	5.489	0.190572	1.04873	0.084761	0.0837257	0.0475764	0.081222	0.0797537	0.350361	0.152521	5.74849	0.107238	0.930251	0.145654
6	YPW1969	m184	2	FUSION	1	4	4	E	10	E10	2	1	1	1	8	1	11298	9576	4177	4072	-0.550715	49	5.47882	0.19966	5.49435	0.214831	1.00391	0.0177673	0.0171163	0.942277	0.0112497	0.0112492	1.00349	0.0173999	0.0170114	5.47882	0.199515	1.33333	0.113036	0.11043	0.287681	0.0847103	0.0826466	0.768058	0.132482	5.73831	0.524935	1.15343	0.125615
27	YPW1966	m156	1	FUSION	1	4	4	E	11	E11	2	1	1	1	8	1	19238	16555	7558	7404	-0.420186	49	5.45685	0.1801	5.52231	0.187908	1.01198	0.0162569	0.0160115	0.992444	0.0035793	0.00357929	1.01191	0.0162562	0.0160012	5.45679	0.180105	1.39007	0.113118	0.111549	0.329358	0.0813468	0.0798602	0.833915	0.125295	5.71628	0.590792	1.19793	0.118428
50	YPW1961	V	1	HO	1	4	4	E	12	E12	2	1	1	1	8	1	18937	15905	7126	6647	-0.355259	48	5.44294	0.169121	5.27456	0.180818	0.969708	0.0176457	0.0178827	0.932135	0.00690302	0.00690291	0.969488	0.0177282	0.0178529	5.44293	0.169081	1.13871	0.088158	0.0888073	0.129892	0.077632	0.0777424	0.502149	0.138995	5.70241	0.259026	1.00081	0.132128
CTRL	YPW1002	CONTROL	1	PLATE.CONTROL	1	4	4	F	1	F01	2	1	1	1	8	2	16435	13694	5881	5487	-0.291633	49	5.45485	0.161478	5.1848	0.17969	0.950067	0.019206	0.0193953	0.906136	0.00805357	0.0080534	0.94987	0.0191538	0.0193607	5.45478	0.161522	1.04784	0.0819634	0.0823178	0.0467274	0.0779765	0.0783545	0.348738	0.1502	5.72824	0.104387	0.929025	0.145805
26	YPW1928	m66	2	FUSION	1	4	4	F	2	F02	2	1	1	1	8	2	15236	13124	6102	5971	-0.312571	48	5.45221	0.1831	5.18914	0.198467	0.952038	0.0182938	0.0185236	0.906155	0.0100991	0.0100987	0.951598	0.0183291	0.018454	5.45206	0.182974	1.0537	0.0854579	0.0861627	0.0358973	0.0779365	0.078083	0.359388	0.15555	5.72552	0.115037	0.933621	0.151155
55	YPW1956	m221	1	HO	1	4	4	F	3	F03	2	1	1	1	8	2	21427	18050	7942	7397	-0.381656	49	5.47146	0.17954	5.21652	0.189891	0.954022	0.0178254	0.0181075	0.868685	0.0155967	0.0155955	0.953543	0.0178112	0.0179447	5.47134	0.17938	1.0638	0.078547	0.0784422	0.0618498	0.0738518	0.0736667	0.377455	0.139077	5.7448	0.133103	0.94153	0.134682
2	YPW978	NULL	1	NULL	1	4	4	F	4	F04	2	1	1	1	8	2	15449	7972	3337	3198	-0.151729	48	5.42573	0.141828	3.1784	0.385115	0.582494	0.0728449	0.0792221	1.27142	-0.126974	-0.126298	0.586631	0.0705113	0.0779812	5.42713	0.143576	0.531786	0.0175038	0.0200647	-0.631515	0.0329605	0.0364543	-2.49179	0.626954	5.70059	-2.73614	0.524848	0.622559
56	YPW1894	m123	1	HO	1	4	4	F	5	F05	2	1	1	1	8	2	18389	15474	7208	6858	-0.54929	49	5.48692	0.203622	5.18249	0.227097	0.94715	0.0200705	0.0197597	0.781568	0.0301774	0.0301683	0.946715	0.019143	0.0190924	5.4868	0.203594	1.03448	0.0800142	0.0788099	0.0338982	0.077359	0.0761942	0.324065	0.147392	5.76026	0.0797132	0.918563	0.142997
[truncated: 30 more rows]
[truncated: 23 more columns]

## Sheet: Dataset 5
SORT	POSITION	ROW	COLUMN	PAIR	UNIQUE.PAIR	STRAIN.1	STRAIN.2	MUT.1	MUT.2	PYRO	ALLELE.1	ALLELE.2	FREQ.ALLELE.1_T1	FREQ.ALLELE.1_T2	FREQ.ALLELE.1_T3	FREQ.ALLELE.1_T4	QUALITY_T1	QUALITY_T2	QUALITY_T3	QUALITY_T4	OD620.T_T1	OD620.T_T2	OD620.T_T3	OD620.T_T4	OD620.I_T1	OD620.I_T2	OD620.I_T3	OD620.I_T4	VOL.T_T1	VOL.T_T2	VOL.T_T3	VOL.T_T4	VOL.I_T1	VOL.I_T2	VOL.I_T3	VOL.I_T4	DENSITY.T_T1	DENSITY.T_T2	DENSITY.T_T3	DENSITY.T_T4	DENSITY.I_T1	DENSITY.I_T2	DENSITY.I_T3	DENSITY.I_T4	G.T_T1	G.I_T1	G.T_T2	G.I_T2	G.T_T3
[truncated: 95 more rows]
[truncated: 5 more columns]

[truncated: 1 more sheets: Dataset 6]
