# Supplementary material for: Fitness effects of altering gene expression noise in Saccharomyces cerevisiae
Source: eLife. 2018 Aug 20;7:e37272. doi: 10.7554/eLife.37272 (PMC6133559; doi:10.7554/eLife.37272)
Supplement: Supplementary file 2. [file elife-37272-supp2.xlsx]

## Sheet: Primers
Supplementary File 2
List of oligonucleotides used in this study.
PRIMER.ID	SORT	PURPOSE	SEQUENCE 5'->3'
1951	1	Insert CORE-UH cassette upstream of YFP coding sequence at HO	ACTTTTATTACATACAACTTTTTAAACTAATATACACATTTTCGTACGCTGCAGGTCGAC
1926	2	Insert CORE-UH cassette upstream of YFP coding sequence at HO	TTGGGACAACACCAGTGAATAATTCTTCACCTTTAGACATCCGCGCGTTGGCCGATTCAT
2276	3	Insert PTDH3 upstream of YFP coding sequence at HO	TTTTCATCCAAAATATTAAATTTTACTTTTATTACATACAACTTTTTAAACTAATATACACATTGTTCGAGTTTATCATTATCAATACTG
2277	4	Insert PTDH3 upstream of YFP coding sequence at HO	ATTAACATCACCATCTAATTCAACCAAAATTGGGACAACACCAGTGAATAATTCTTCACCTTTAGACATTTTGTTTGTTTATGTGTGTTT
2425	5	Confirm insertion of PTDH3 upstream of YFP coding sequence at HO	CAAATCAGTGCCGGTAACGC
1208	6	Confirm insertion of PTDH3 upstream of YFP coding sequence at HO	GCAAAACACATTAAACCATAACC
P4E8	7	Insert mutation RAP1(G505a) in PTDH3	AACTGTTCACTCAGACACCTAC
P4E5	8	Insert mutation RAP1(G510a) in PTDH3	TCACCCAGATACCTACGATG
P4G8	9	Insert mutation GCR1.2(C444t) in PTDH3	TTTTTTTCTGAATGCCAGCTT
P4G7	10	Insert mutation GCR1.2(C447t) in PTDH3	TTTTCTGGATACCAGCTTAA
P1E8	11	Insert mutation RAP1(G505a) in PTDH3	GTAGGTGTCTGAGTGAACAGTT
P1E5	12	Insert mutation RAP1(G510a) in PTDH3	CATCGTAGGTATCTGGGTGA
P1G8	13	Insert mutation GCR1.2(C444t) in PTDH3	AAGCTGGCATTCAGAAAAAAA
P1G7	14	Insert mutation GCR1.2(C447t) in PTDH3	TTAAGCTGGTATCCAGAAAA
104	15	Amplify region upstream of YFP	TTTTAAGGTCAATTTACCGTAAGTAGC
1305	16	Amplify region upstream of YFP	GGTGAAGGTGAAGGTGATGC
1891	17	Confirm insertion of PTDH3 upstream of YFP coding sequence at HO	CATGTCTTCTCGTTAAGACTGCAT
2481	18	Create GCN4 binding site in PTDH3	GTAGGTGTCTGGGTGAACAGTTGACTCATGGCATCCACTAAATATAATG
2482	19	Create GCN4 binding site in PTDH3	CATTATATTTAGTGGATGCCATGAGTCAACTGTTCACCCAGACACCTAC
2483	20	Create GCN4 binding site in PTDH3	CCAGCACCAAAATATTGTTTGACTCACCAACCATCAGTTCATAG
2484	21	Create GCN4 binding site in PTDH3	CTATGAACTGATGGTTGGTGAGTCAAACAATATTTTGGTGCTGG
2485	22	Create GCN4 binding site in PTDH3	CAGTTCATAGGTCCATTCTCTTGACTCAACTACAGAGAACAGGGGC
2486	23	Create GCN4 binding site in PTDH3	GCCCCTGTTCTCTGTAGTTGAGTCAAGAGAATGGACCTATGAACTG
2487	24	Create GCN4 binding site in PTDH3	ACAGGCAAAAAACGGGCACTGACTCAATGGAGTGATGCAACC
2488	25	Create GCN4 binding site in PTDH3	GGTTGCATCACTCCATTGAGTCAGTGCCCGTTTTTTGCCTGT
2489	26	Create GCN4 binding site in PTDH3	CTGCCTGGAGTAAATGATGACTCAAGGCAATTGACTCACGCATG
2490	27	Create GCN4 binding site in PTDH3	CATGCGTGAGTCAATTGCCTTGAGTCATCATTTACTCCAGGCAG
2491	28	Create GCN4 binding site in PTDH3	GATGACTCAAGGCAATTGACTCACGCATGTATCTGACTCAT
2492	29	Create GCN4 binding site in PTDH3	ATGAGTCAGATACATGCGTGAGTCAATTGCCTTGAGTCATC
2493	30	Create GCN4 binding site in PTDH3	CAATTGACTCACGCATGTATCTGACTCATTTTCTTACACCTTCT
2494	31	Create GCN4 binding site in PTDH3	AGAAGGTGTAAGAAAATGAGTCAGATACATGCGTGAGTCAATTG
2495	32	Create GCN4 binding site in PTDH3	GCTGAAAAAAAAGGTTGACTCAAGTTCCCTGAAATTATTCCC
2496	33	Create GCN4 binding site in PTDH3	GGGAATAATTTCAGGGAACTTGAGTCAACCTTTTTTTTCAGC
2497	34	Create GCN4 binding site in PTDH3	AATTATTCCCCTACTTGACTCATAAGTATATAAAGACGGTAG
2498	35	Create GCN4 binding site in PTDH3	CTACCGTCTTTATATACTTATGAGTCAAGTAGGGGAATAATT
2499	36	Create GCN4 binding site in PTDH3	ATAAAGACGGTAGGTATTGACTCAAATTCTGTAAATCTATTTC
2500	37	Create GCN4 binding site in PTDH3	GAAATAGATTTACAGAATTTGAGTCAATACCTACCGTCTTTAT
2478	38	Random mutagenesis of TATA box in PTDH3	CCCTACTTGACTAATAAG(N1:09090973)(N2:73090909)(N1)(N2)(N1)(N2)(N2)(N2)GACGGTAGGTATTGATTGTAATTCTG
2479	39	Amplify left fragment of PTDH3 for TATA box mutagenesis	CTTATTAGTCAAGTAGGGGA
2788	40	Amplify left fragment of PTDH3 for combining TFBS and TATA box mutations	GATGACACAAGGCAATTGACCCACGCATGTATCTATCTC
2787	41	Amplify right fragment of PTDH3 for combining TFBS and TATA box mutations	GAGATAGATACATGCGTGGGTCAATTGCCTTGTGTCATC
2688	42	Amplify URA3 from pCORE-UK plasmid	TTCGTACGCTGCAGGTCGAC
2686	43	Amplify URA3 from pCORE-UK plasmid to be fused with PTDH3	ATGGCAGTATTGATAATGATAAACTCGAACCCTTACCATTAAGTTGATCCATTGTGTGCT
2687	44	Amplify PTDH3-YFP-TCYC1 to be fused with URA3	AGCACACAATGGATCAACTTAATGGTAAGGGTTCGAGTTTATCATTATCAATACTGCCAT
1893	45	Amplify PTDH3-YFP-TCYC1	CCTCGACATCATCTGCCCAGAT
2684	46	Insert URA3-PTDH3-YFP-TCYC1 downstream of PTDH3-YFP-TCYC1 at HO	TTTACACTTGGCAAAGCAAGGTCCATGTTTTCTTGAAAGGTAAGAAGTGATCGATGAATTCGAGCTCGTTAGCTCGGAATTAACCCTCAC
2683	47	Insert URA3-PTDH3-YFP-TCYC1 downstream of PTDH3-YFP-TCYC1 at HO	CTATTGCTACTCAAATGAGGTTTGCAGAAGCTTGTTGAAGCATGATGAAGCGTTCTAAACGCACTATTCAAGTGTAAACGCGAAGCTTGC
2685	48	Insert URA3 downstream of PTDH3-YFP-TCYC1 at HO	GCTATTGCTACTCAAATGAGGTTTGCAGAAGCTTGTTGAAGCATGATGAAGCGTTCTAAACGCACTATTCCCTTACCATTAAGTTGATCC
2480	49	Amplify double-copy constructs at HO	TGGCGTATTACTACTCCAGC
1499	50	Amplify double-copy constructs at HO	TTCAATAGCTCATCAGTCGA
1872	51	Amplify double-copy constructs at HO	AAGTGATCGATGAATTCGAG
2635	52	Amplify double-copy constructs at HO	GGTTTACGAAATGATCCACG
1204	53	Sequence double-copy constructs at HO	TGTTGTCCCAATTTTGGTTG
2635	54	Sequence double-copy constructs at HO	GGTTTACGAAATGATCCACG
601	55	Sequence double-copy constructs at HO	GGTTGAAACCAGTTCCCTGA
2268	56	Pyrosequencing to quantify allele frequency at position -293 in PTDH3	TAGCGCAACTACAGAGAACAGGG
3094	57	Pyrosequencing to quantify allele frequency at position -293 in PTDH3	/5Biosg/GAGATAGATACATGCGTGGG
2270	58	Pyrosequencing to quantify allele frequency at position -293 in PTDH3	ATGCAACCTGCCTGG
1909	59	Replace native PTDH3 with CORE-UK cassette	GGGAGTTAGAATCATTTTGAATAAAAAACACGCTTTTTCATTCGTACGCTGCAGGTCGAC
1910	60	Replace native PTDH3 with CORE-UK cassette	TACCGATTCTACCGAAACCGTTAATAGCAACTCTAACCATCCGCGCGTTGGCCGATTCAT
1914	61	Insert PTDH3 variants at the native TDH3 locus	GGAGTTAGAATCATTTTGAATAAAAAACACGCTTTTTCAGTTCGAGTTTATCATTATCAA
1900	62	Insert PTDH3 variants at the native TDH3 locus	AAACACACATAAACAAACAAAATGGTTAGAGTTGCTATTAACGGTTTCGGTAGAATCGGT
1345	63	Confirm insertion of PTDH3 variants at native TDH3 locus	CTCATCAGTAAGACCCGTTG
1342	64	Confirm insertion of PTDH3 variants at native TDH3 locus	GATGAATGGGTCGTTCAAAG
2696	65	Insert URA3-PTDH3-TDH3 downstream of PTDH3-TDH3 at TDH3 locus	GACTTAGTTTCAATTTATATACTATTTTAATGACATTTTCGATTCATTGATTGAAAGCTTTGTGTTTTTTCGGAGACAATCATATGGGAG
2693	66	Insert URA3-PTDH3-TDH3 downstream of PTDH3-TDH3 at TDH3 locus	CTTCAGAATCGTTATCCTGGC
2697	67	Insert URA3 downstream of PTDH3-TDH3 at TDH3 locus	ATGTATCAGGTATCTACTACAGATATTACATGTGGCGAAAAAGACAAGAACAATGCAATAGCGCATCAAGTGGAGGAAGTTTGAGAGGGC
2694	68	Amplify TDH3 duplication	ACACGTTGCCAAGGCTTAAG
2670	69	Amplify TDH3 duplication	TATCATCATTGTTGGCAGAG
2695	70	Amplify TDH3 duplication	AGATGATACTGACTGCACGC
2691	71	Sequence TDH3 duplication	CTACTCAAAAGACTGTTGAC
2053	72	Sequence TDH3 duplication	CATTTCAACTATCTAAGATG
3095	73	Pyrosequencing to quantify allele frequency at position -293 in native PTDH3	/5Biosg/GACCAATCTACCGATTCTAC
1962	74	Delete TDH3 promoter and coding sequence	GAAAATTTATTTAAATGCAAGATTTAAAGTAAATTCACGAATAAAAAACACGCTTTTTCA
2444	75	Confirm TDH3 deletion	CAATGCAATAGCGCATCAAG
2049	76	Amplify GFP to be fused with KanMX4	CTATTTGTACAATTCATCCATACC
2050	77	Amplify KanMX4 to be fused with GFP	GGTATGGATGAATTGTACAAATAG
2723	78	Pyrosequencing to quantify YFP vs GFP allele frequency	/5Biosg/TGGTGATGGTCCAGTCTTGTTAC
2725	79	Pyrosequencing to quantify YFP vs GFP allele frequency	GGATCTTTGGATAAGGCAGATTG
2726	80	Pyrosequencing to quantify YFP vs GFP allele frequency	TCTTTGGATAAGGCAGAT
3166	81	Pyrosequencing to quantify frequency of mutations G510a, G505a, C444t and C485t in PTDH3	/5Biosg/AGAAGTTTAATGACGCGGAGGC
3168	82	Pyrosequencing to quantify frequency of mutation G510a, G505a and C444t in PTDH3	TGCGCTAAGAGAATGGACCTATG
3172	83	Pyrosequencing to quantify frequency of mutation G510a in PTDH3	GAATAAACTGTTCACCCA
3173	84	Pyrosequencing to quantify frequency of mutation G505a in PTDH3	CCAGGAATAAACTGTTCAC
3174	85	Pyrosequencing to quantify frequency of mutation C444t in PTDH3	GGGATTCTTTTTTTTTCTG
3171	86	Pyrosequencing to quantify frequency of mutation C485t in PTDH3	CTTAAAAAGCGGGCTCCATTATAT
3175	87	Pyrosequencing to quantify frequency of mutation C485t in PTDH3	CTCCATTATATTTAGTGGAT
3176	88	Pyrosequencing to quantify frequency of mutation G220a in PTDH3	TGACCCACGCATGTATCTATCT
3167	89	Pyrosequencing to quantify frequency of mutation G220a in PTDH3	/5Biosg/CGAAACCGTTAATAGCAACTCT
3177	90	Pyrosequencing to quantify frequency of mutation G220a in PTDH3	TCTTACACCTTCTATTACCT
3415	91	Fuse coding sequences of TDH3 and YFP	TACCAGAGTTGTCGACTTGGTTGAACACGTTGCCAAGGCTGGTCGACGGATCCCCGGGTTAATTAACAGTAAAGGTGAAGAATTATTCAC
3416	92	Fuse coding sequences of TDH3 and YFP	AAGAAAATTTATTTAAATGCAAGATTTAAAGTAAATTCACCGTACGCTGCAGGTCGACGG
1344	93	Amplify native TDH3 promoter	TGTTAGCGTCAACAACAAGAAG
1952	94	Amplify native TDH3 promoter	CAGCGTATCTACCGTGAGTG
1890	95	Amplify cassette inserted at HO	TATTAGGTGTGAAACCACGAAAAGT
