# Supplementary figures and images for: Fitness effects of altering gene expression noise in Saccharomyces cerevisiae
Source: eLife journal article supplement (doi:10.7554/elife.37272), 2018-08-20

Figure 1 - figure supplement 1

**A**

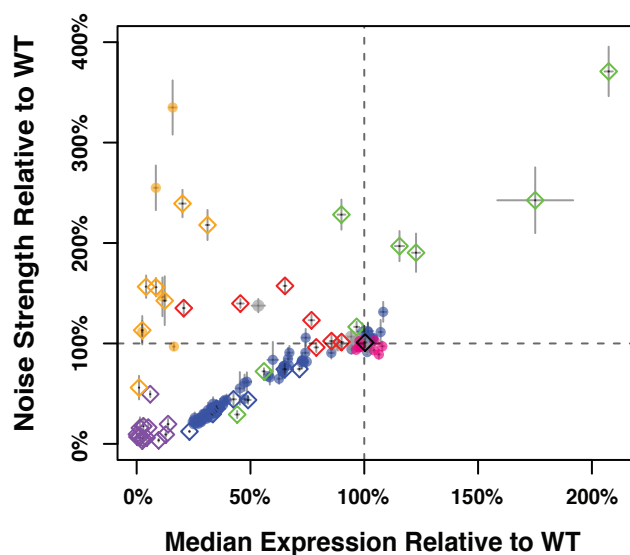

**C**

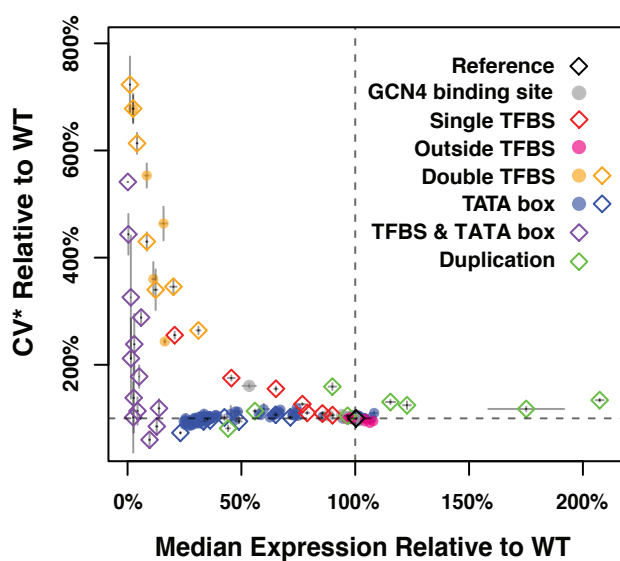

**B**

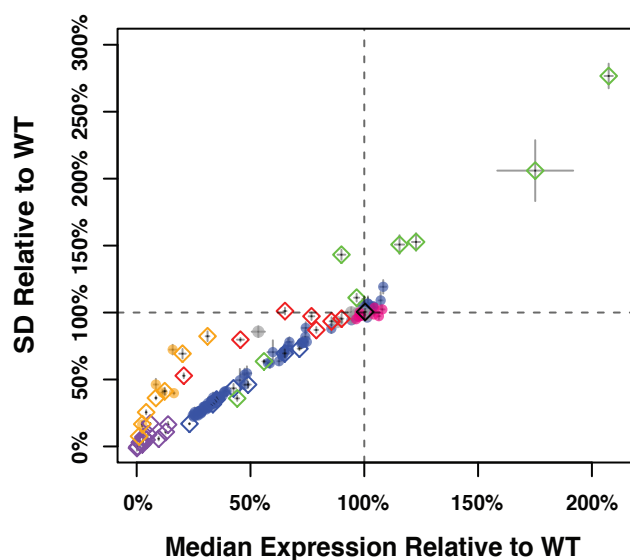

**D**

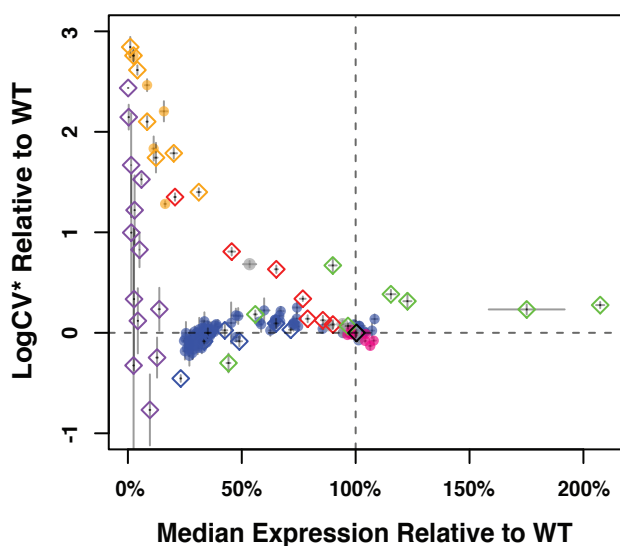

Supplement: supp [file elife_poa_e37272_Figure_1_figure_supplement_1.pdf › elife_poa_e37272_Figure_1_figure_supplement_1.pdf]

Figure 2 - figure supplement 1

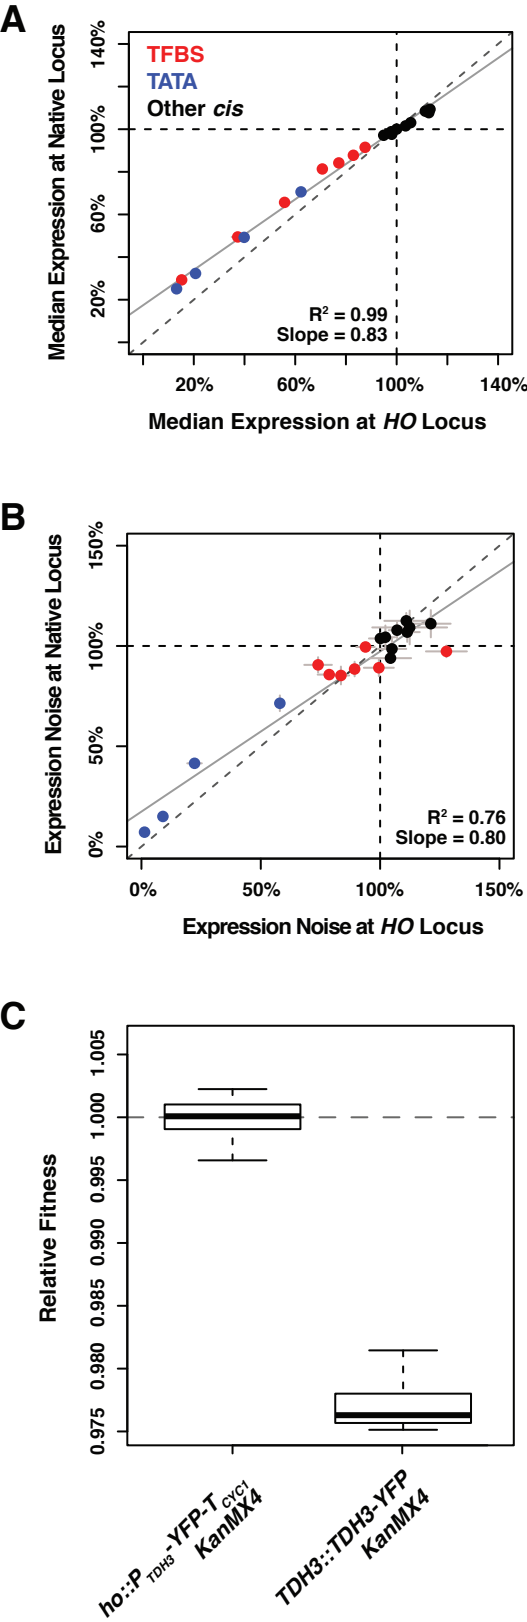

Supplement: supp [file elife_poa_e37272_Figure_2_figure_supplement_1.pdf › elife_poa_e37272_Figure_2_figure_supplement_1.pdf]

Figure 2 - figure supplement 2

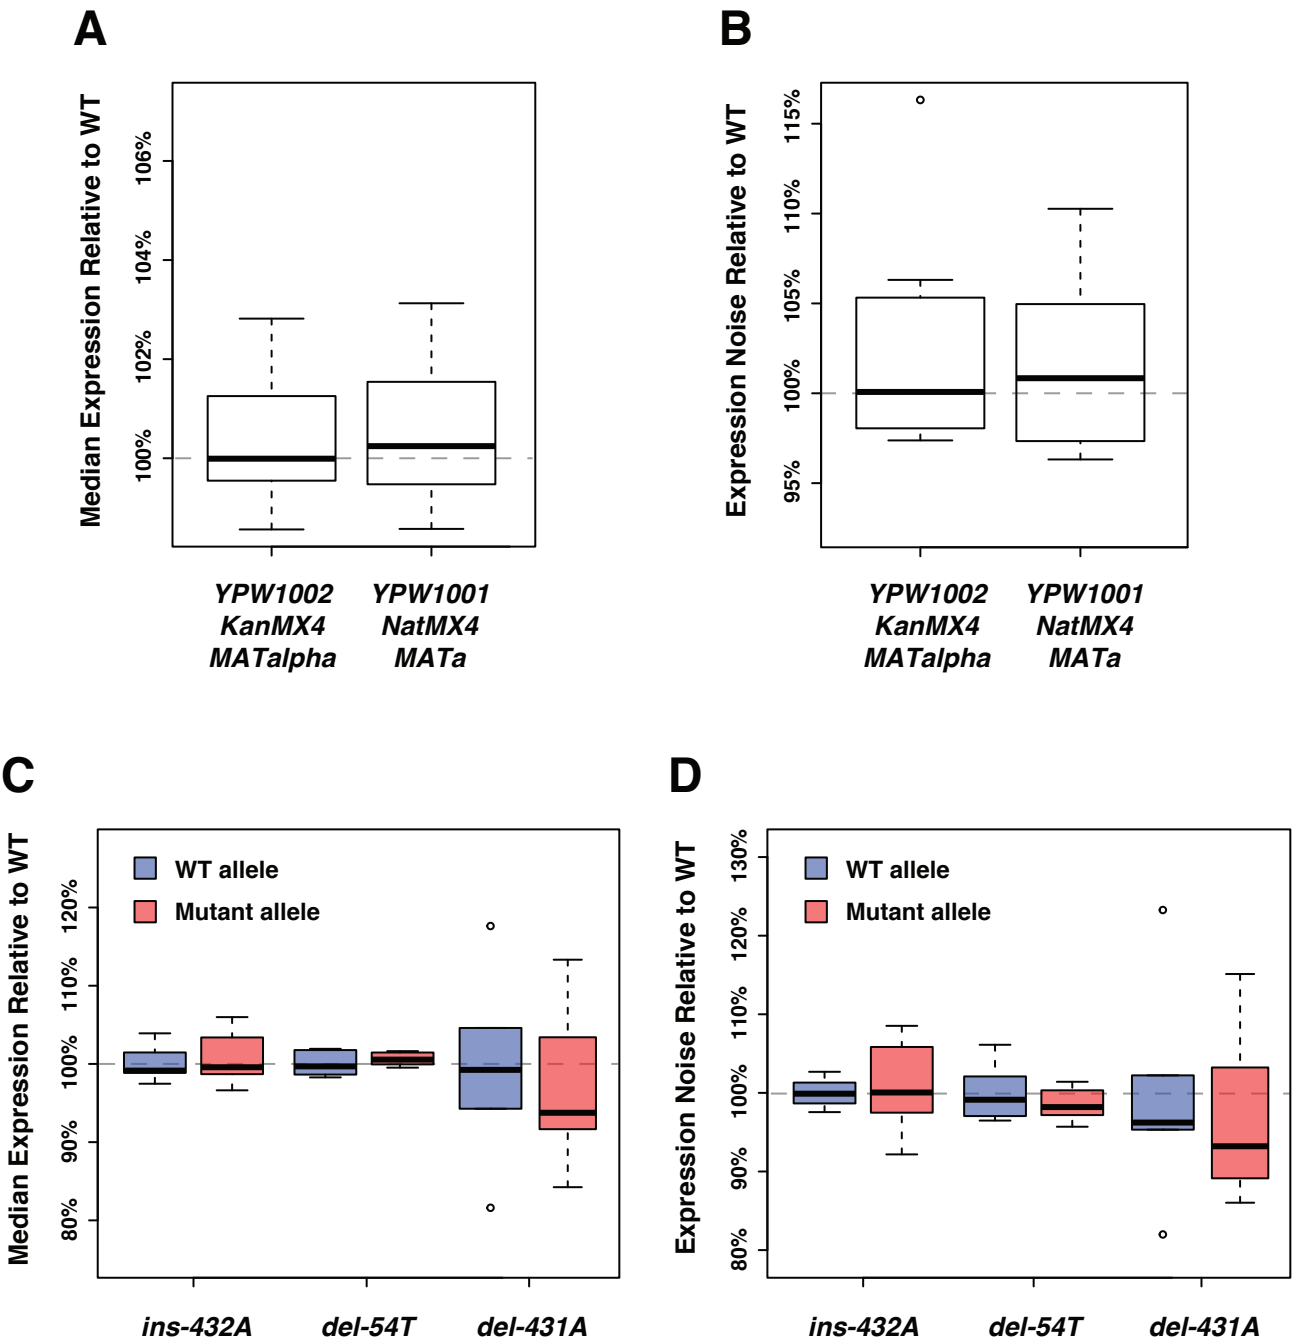

Supplement: supp [file elife_poa_e37272_Figure_2_figure_supplement_2.pdf › elife_poa_e37272_Figure_2_figure_supplement_2.pdf]

Figure 3 - figure supplement 1

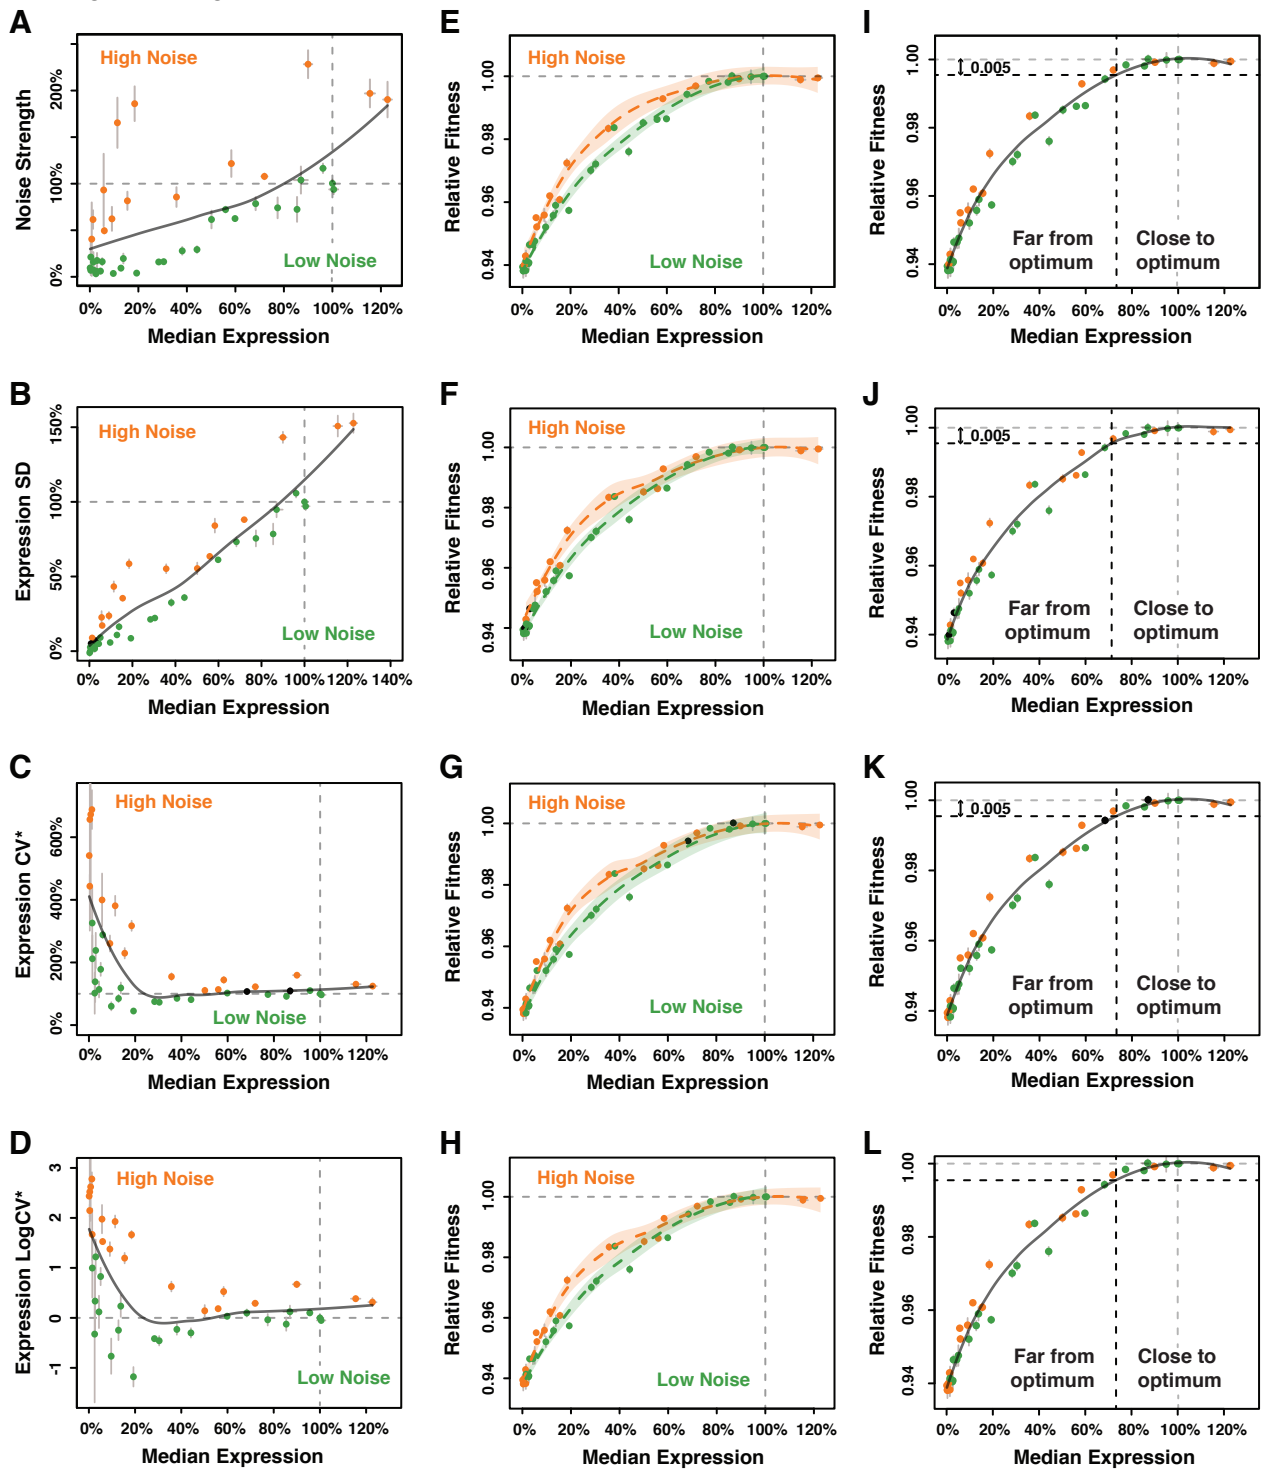

Supplement: supp [file elife_poa_e37272_Figure_3_figure_supplement_1.pdf › elife_poa_e37272_Figure_3_figure_supplement_1.pdf]

Figure 3 - figure supplement 2

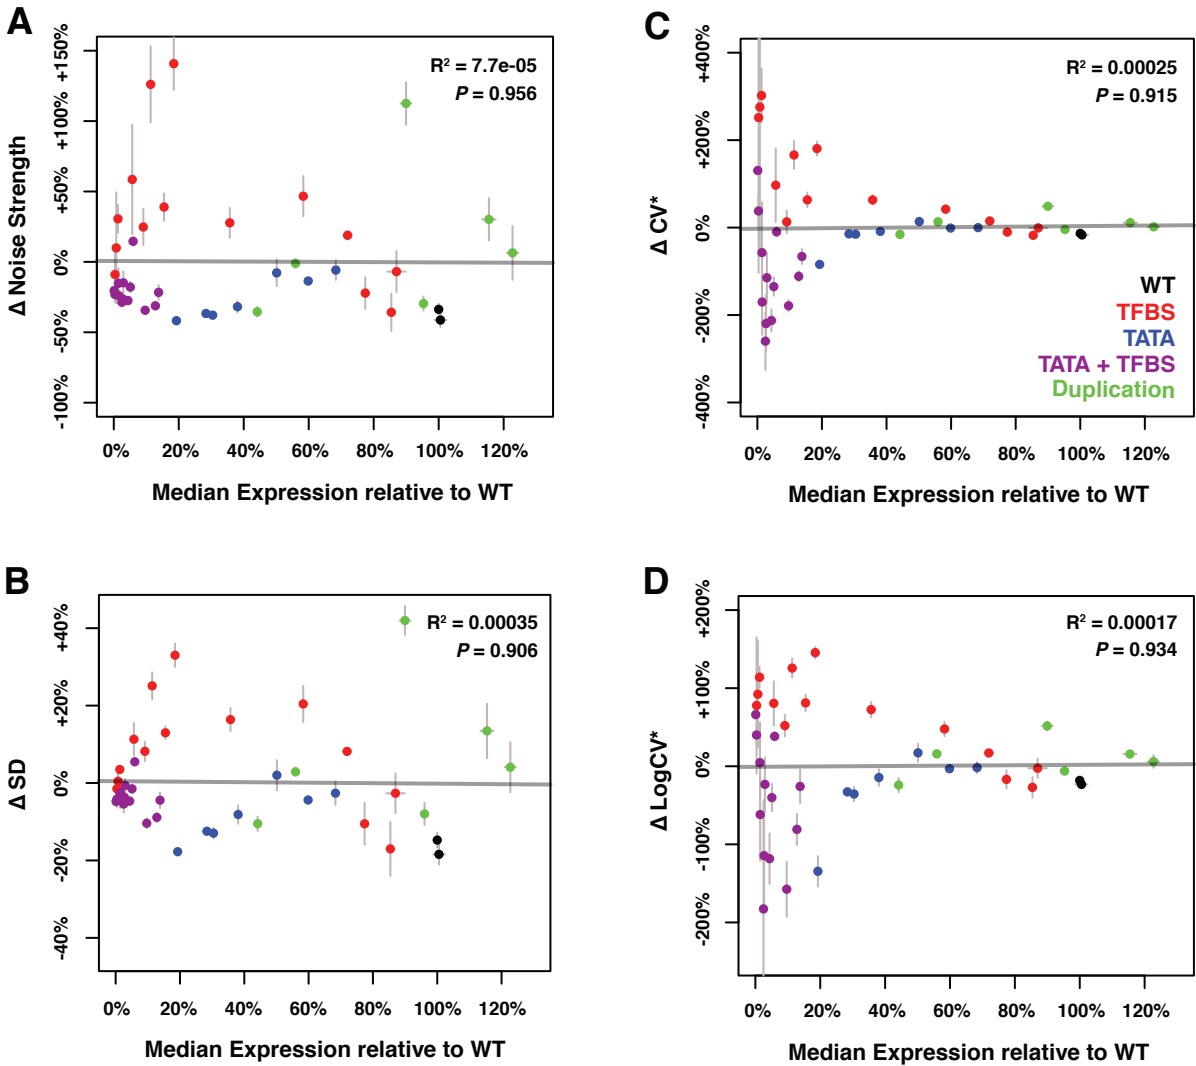

Supplement: supp [file elife_poa_e37272_Figure_3_figure_supplement_2.pdf › elife_poa_e37272_Figure_3_figure_supplement_2.pdf]

Figure 3 - figure supplement 3

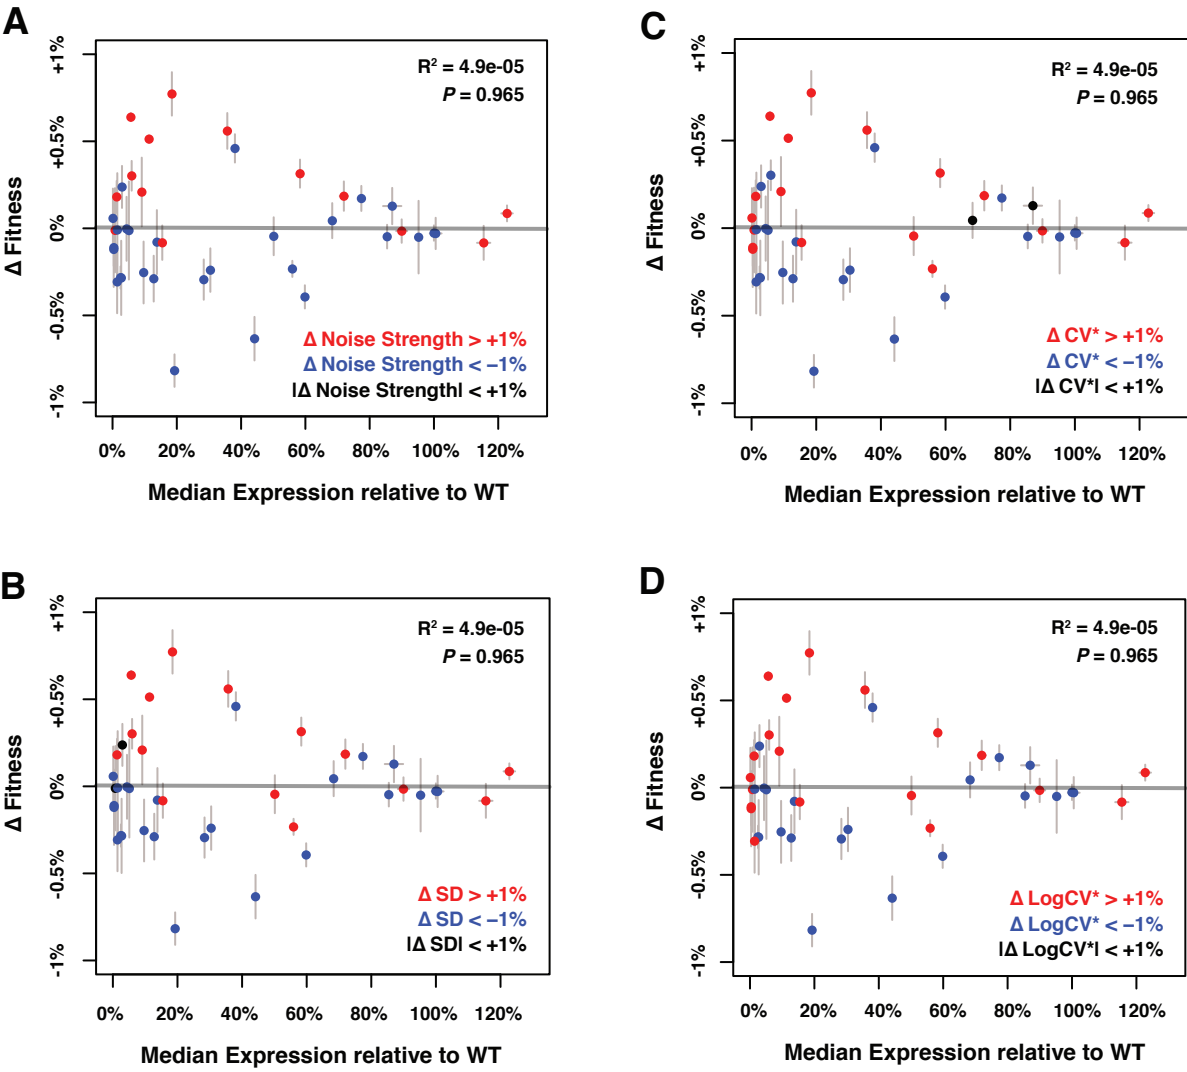

Supplement: supp [file elife_poa_e37272_Figure_3_figure_supplement_3.pdf › elife_poa_e37272_Figure_3_figure_supplement_3.pdf]

Figure 3 - figure supplement 4

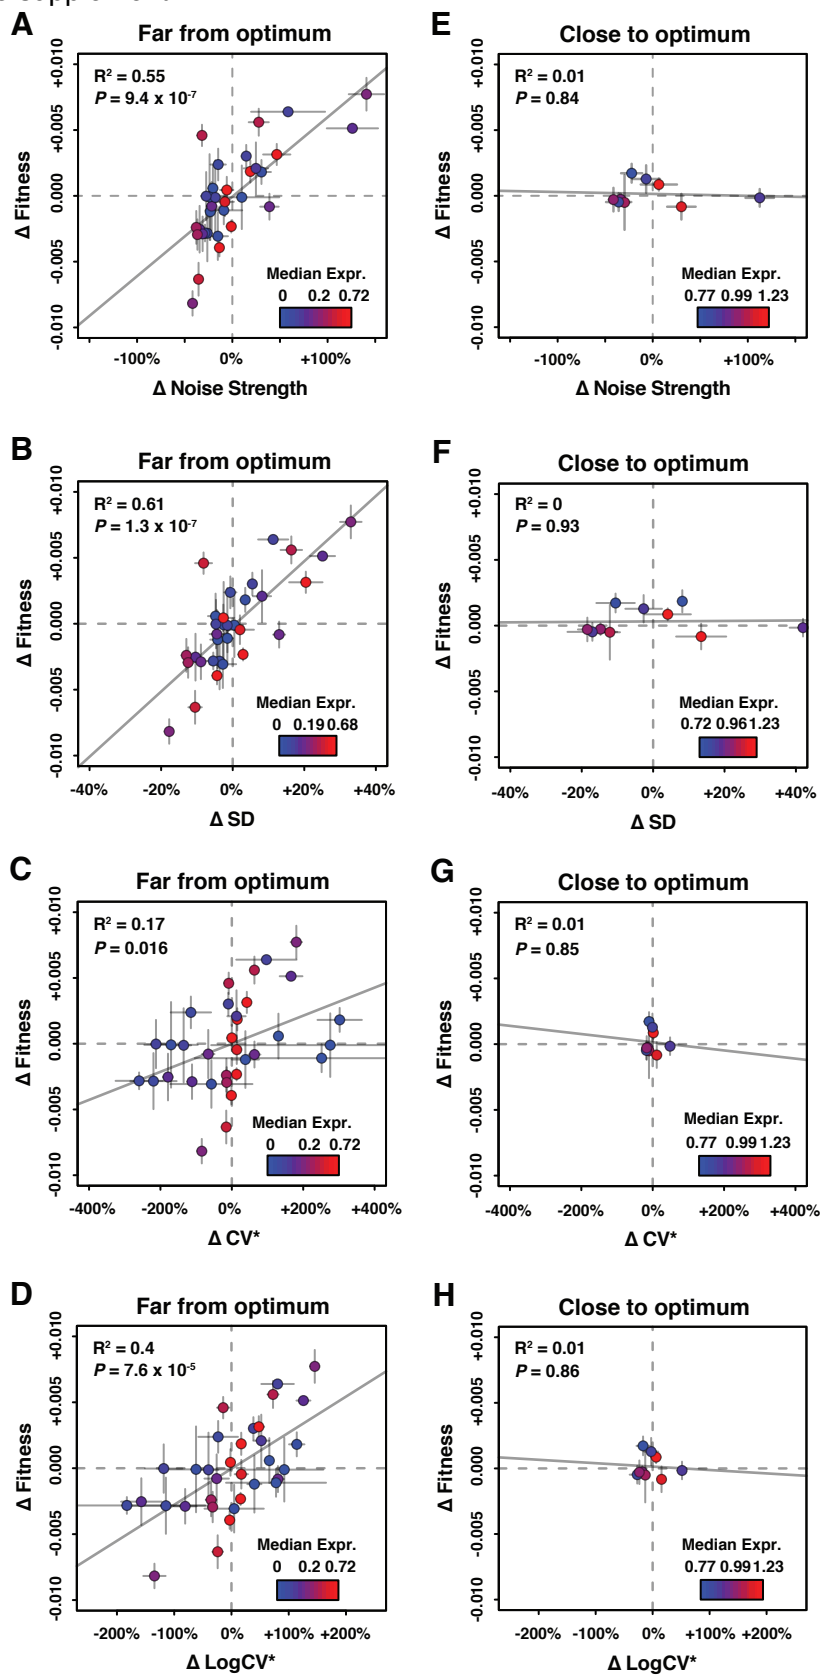

Supplement: supp [file elife_poa_e37272_Figure_3_figure_supplement_4.pdf › elife_poa_e37272_Figure_3_figure_supplement_4.pdf]

Figure 3 - figure supplement 5

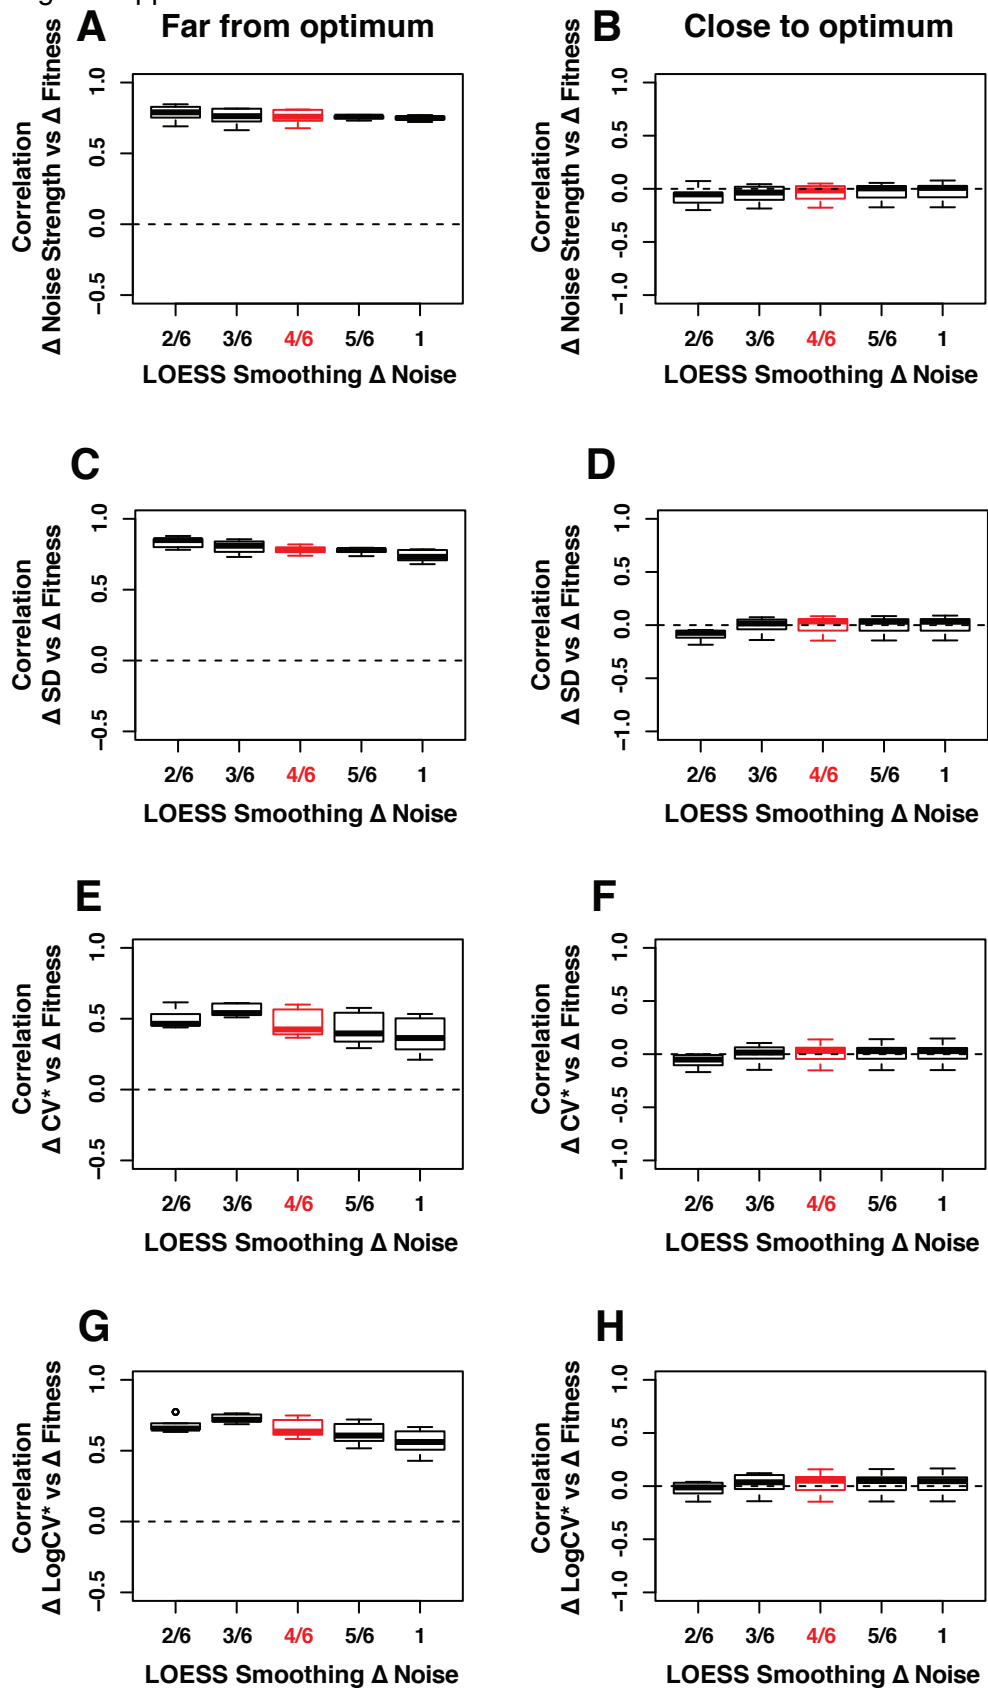

Supplement: supp [file elife_poa_e37272_Figure_3_figure_supplement_5.pdf › elife_poa_e37272_Figure_3_figure_supplement_5.pdf]

Figure 3 - figure supplement 6

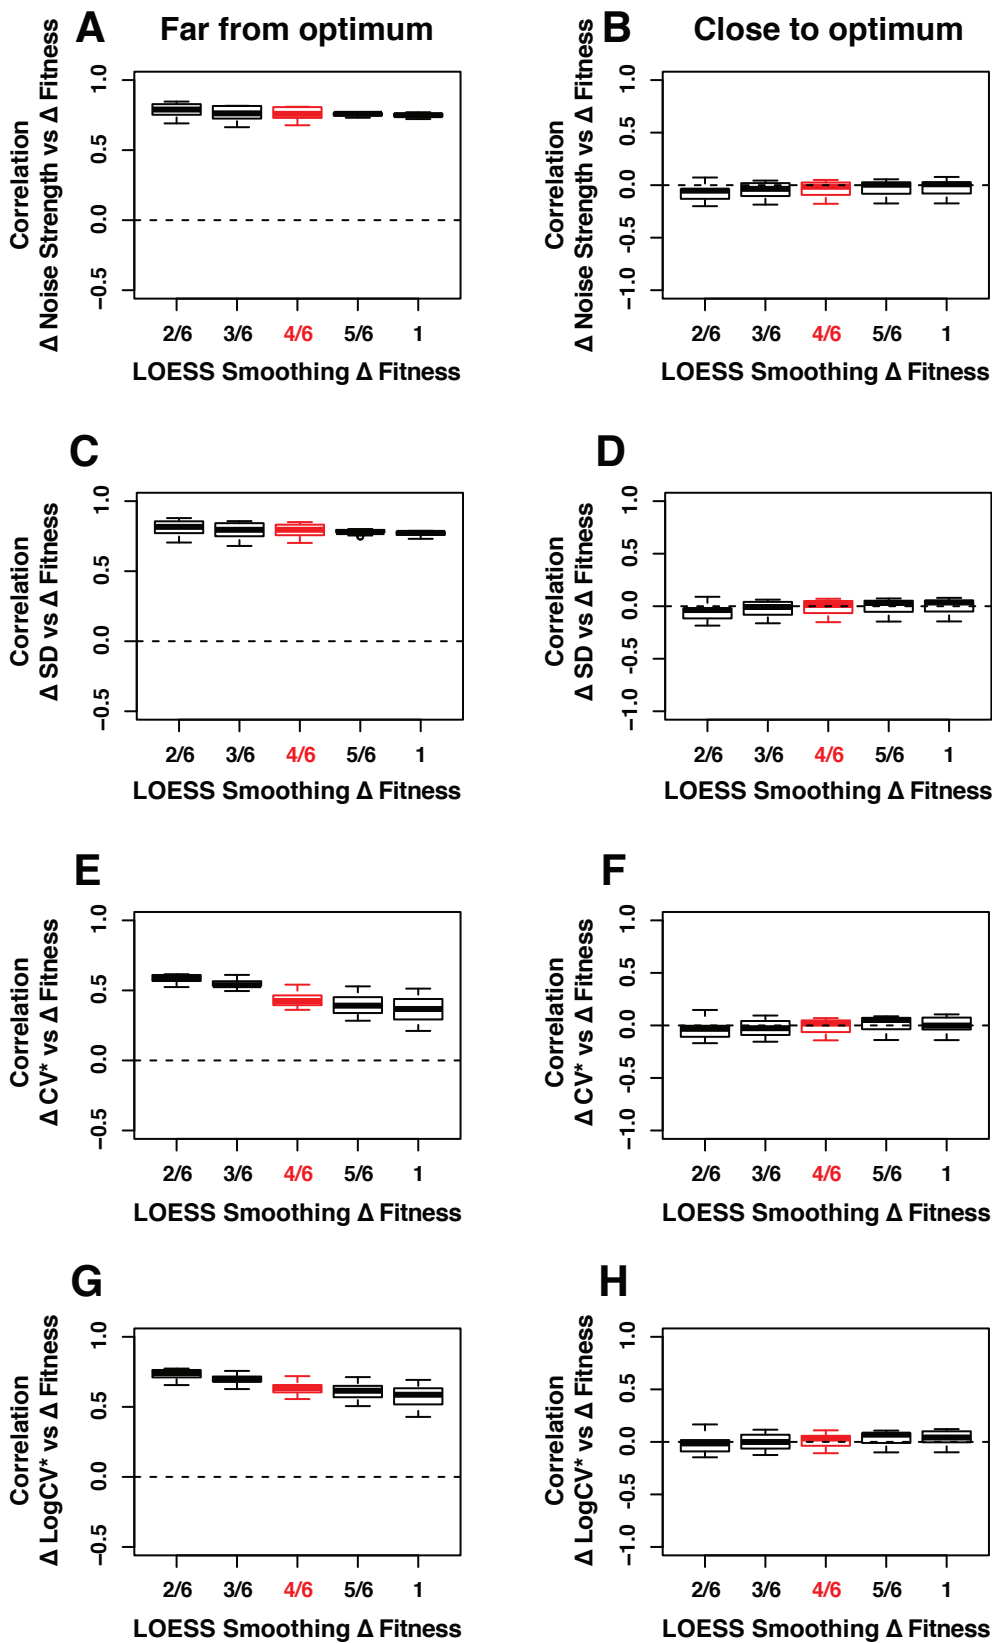

Supplement: supp [file elife_poa_e37272_Figure_3_figure_supplement_6.pdf › elife_poa_e37272_Figure_3_figure_supplement_6.pdf]

Figure 3 - figure supplement 7

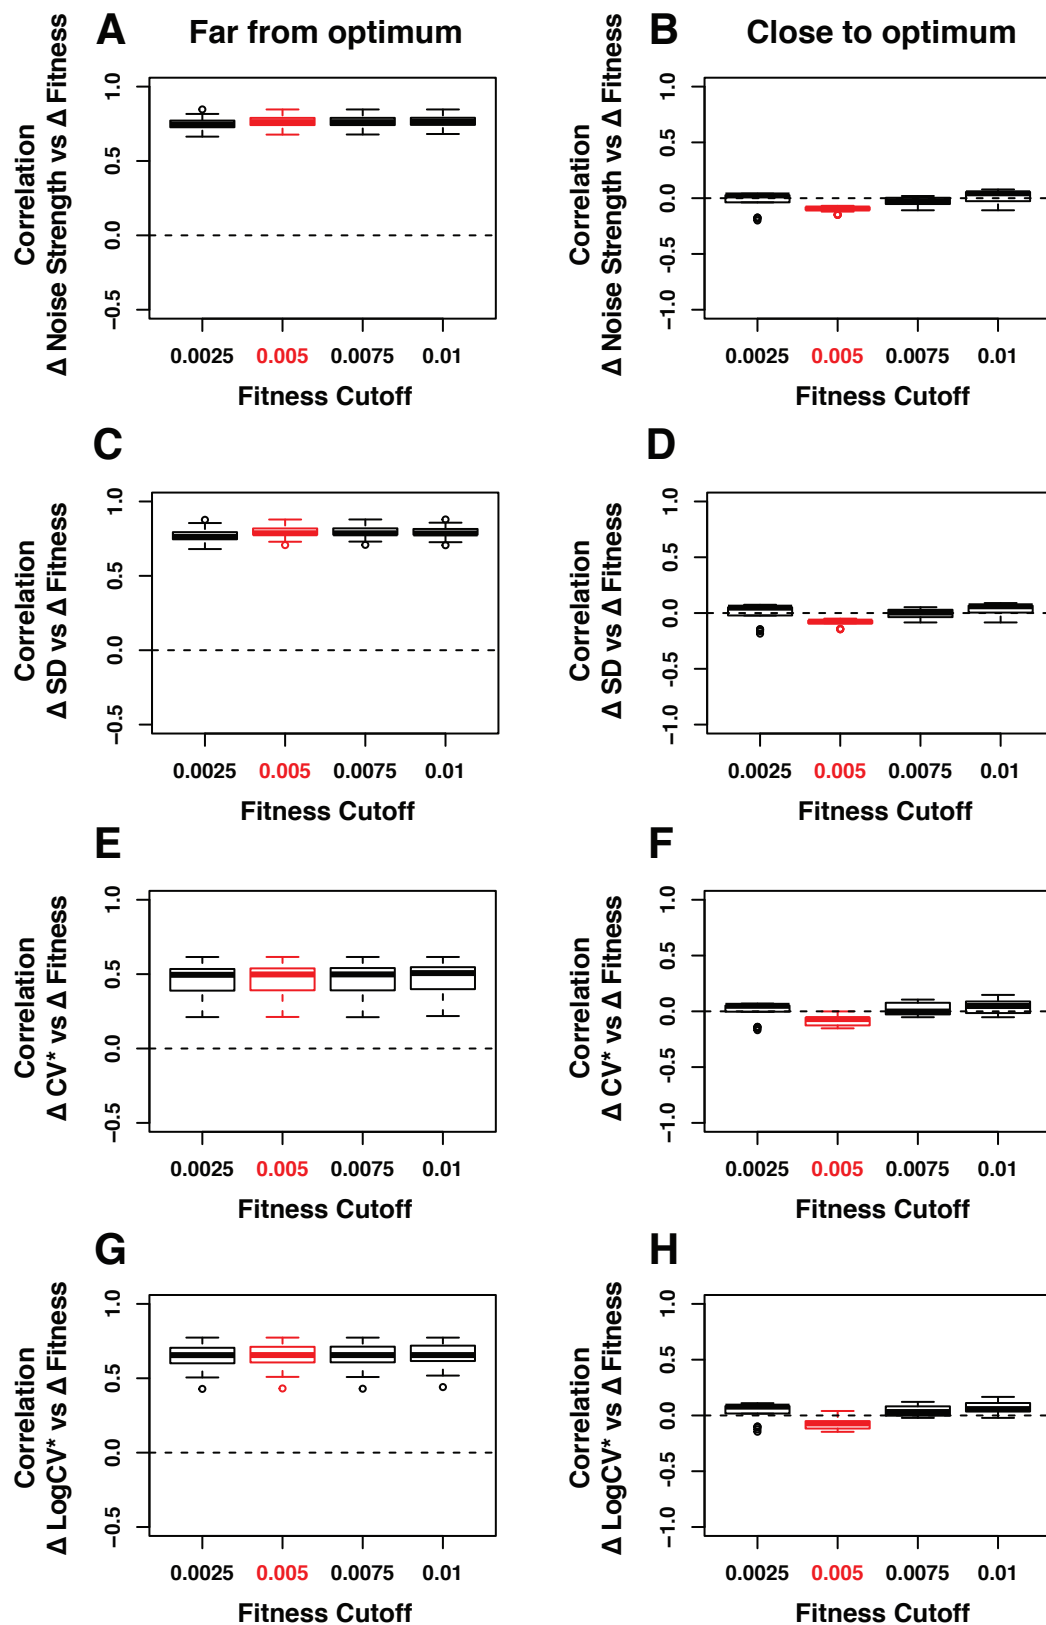

Supplement: supp [file elife_poa_e37272_Figure_3_figure_supplement_7.pdf › elife_poa_e37272_Figure_3_figure_supplement_7.pdf]

Figure 3 - figure supplement 8

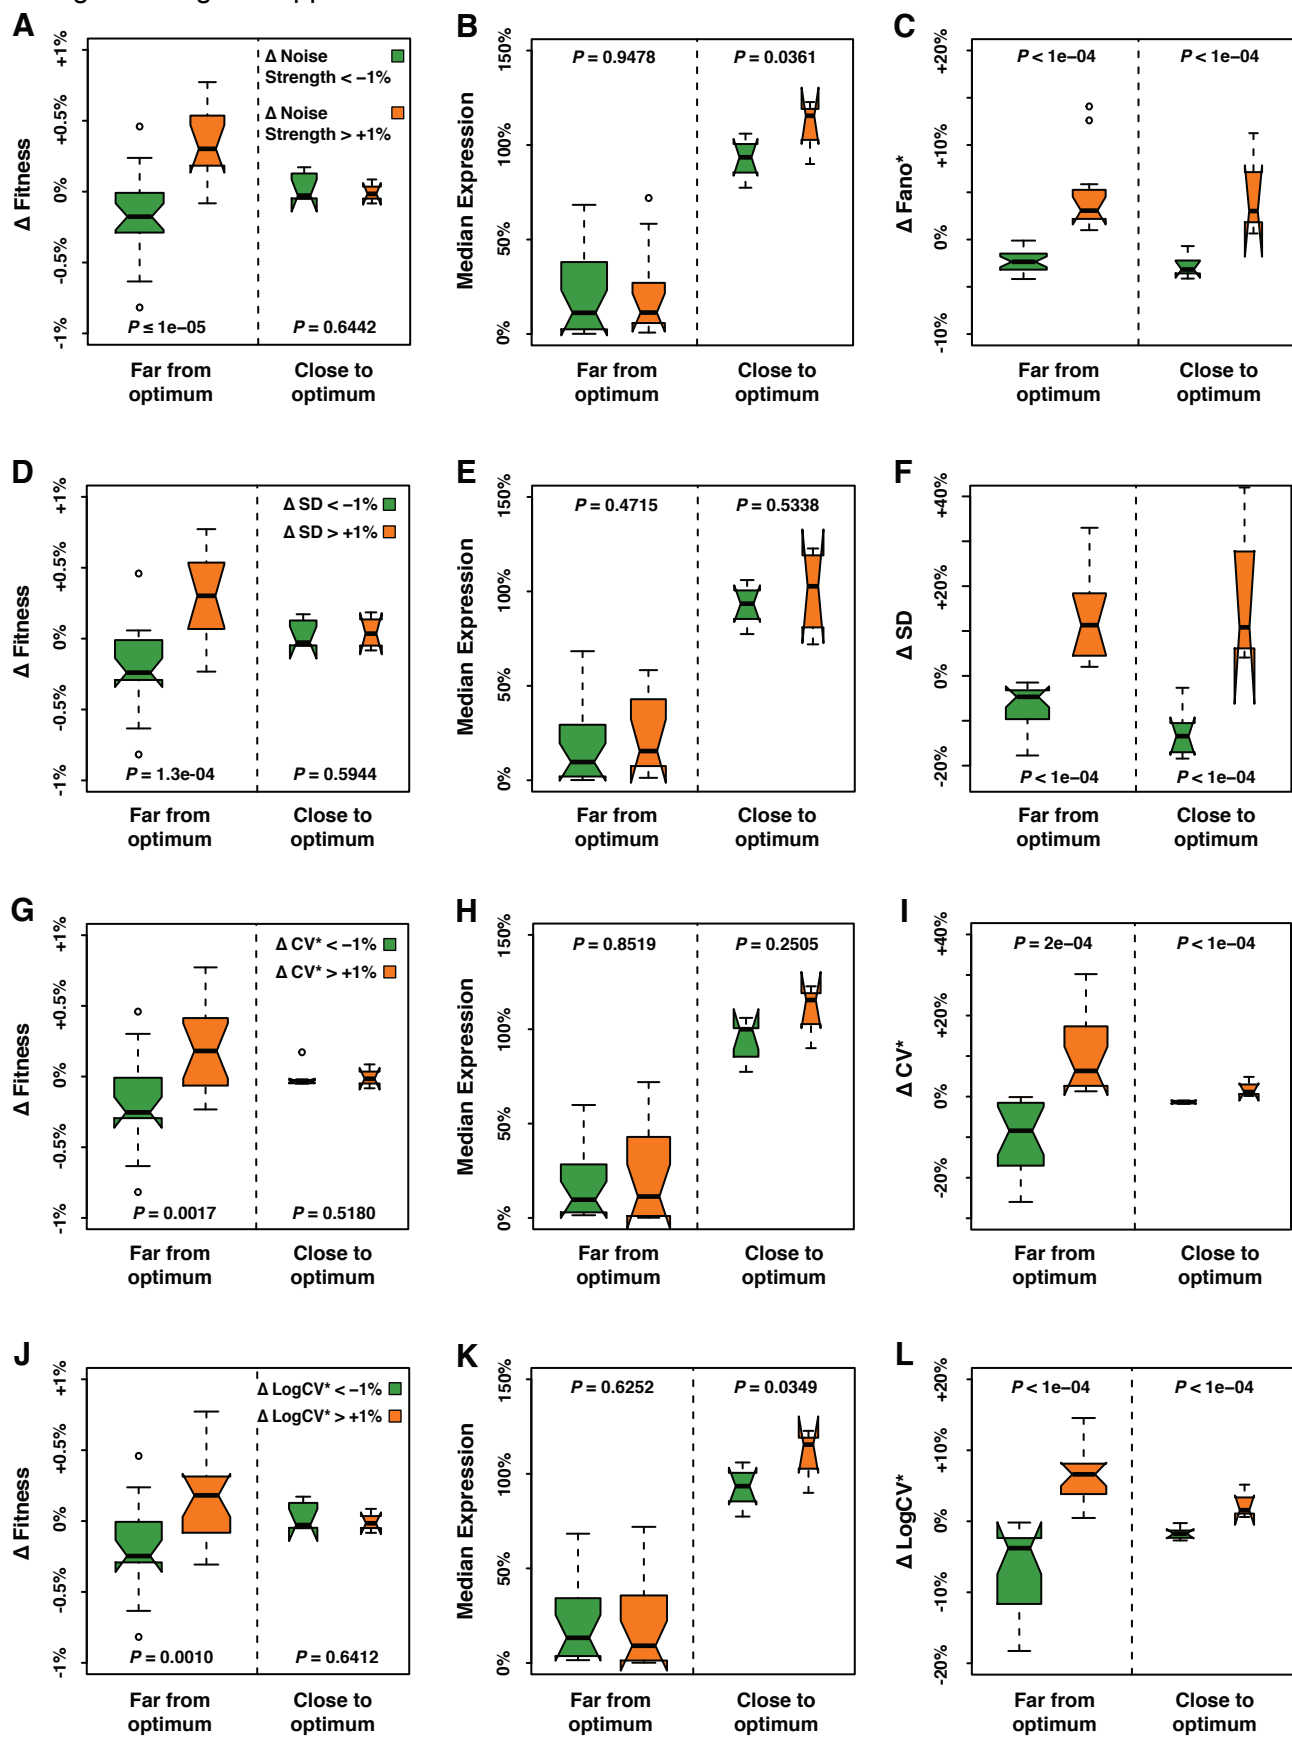

Supplement: supp [file elife_poa_e37272_Figure_3_figure_supplement_8.pdf › elife_poa_e37272_Figure_3_figure_supplement_8.pdf]

Figure 4 - figure supplement 1

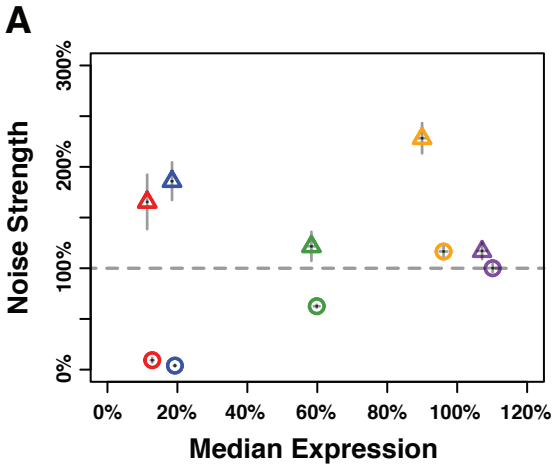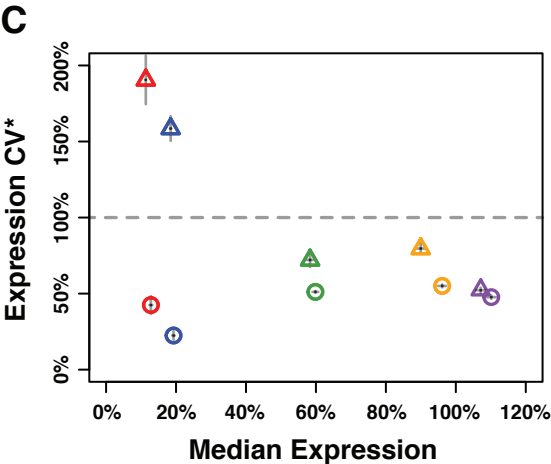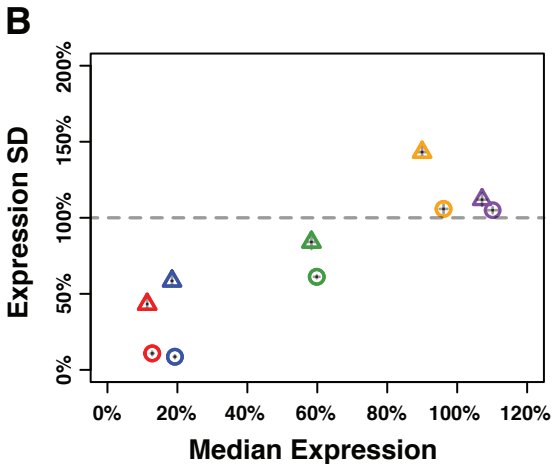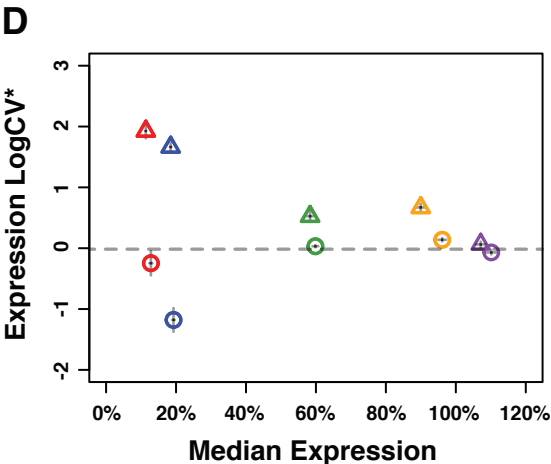

Supplement: supp [file elife_poa_e37272_Figure_4_figure_supplement_1.pdf › elife_poa_e37272_Figure_4_figure_supplement_1.pdf]

Figure 5 - figure supplement 1

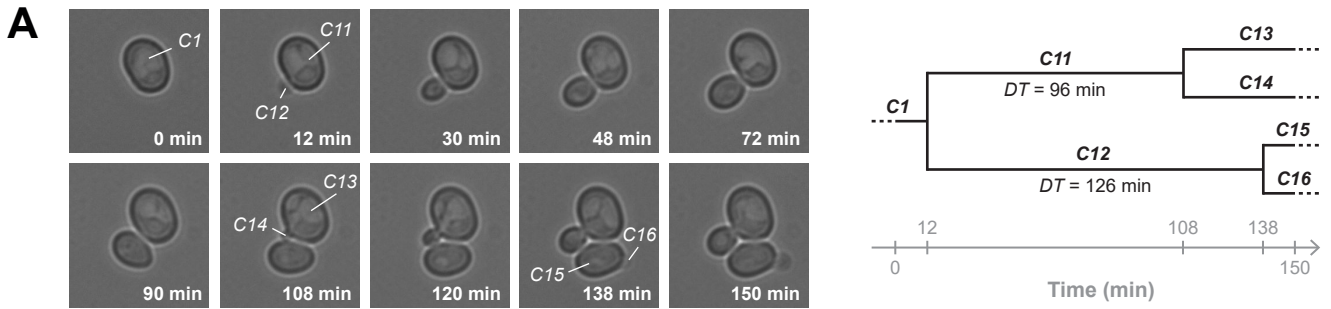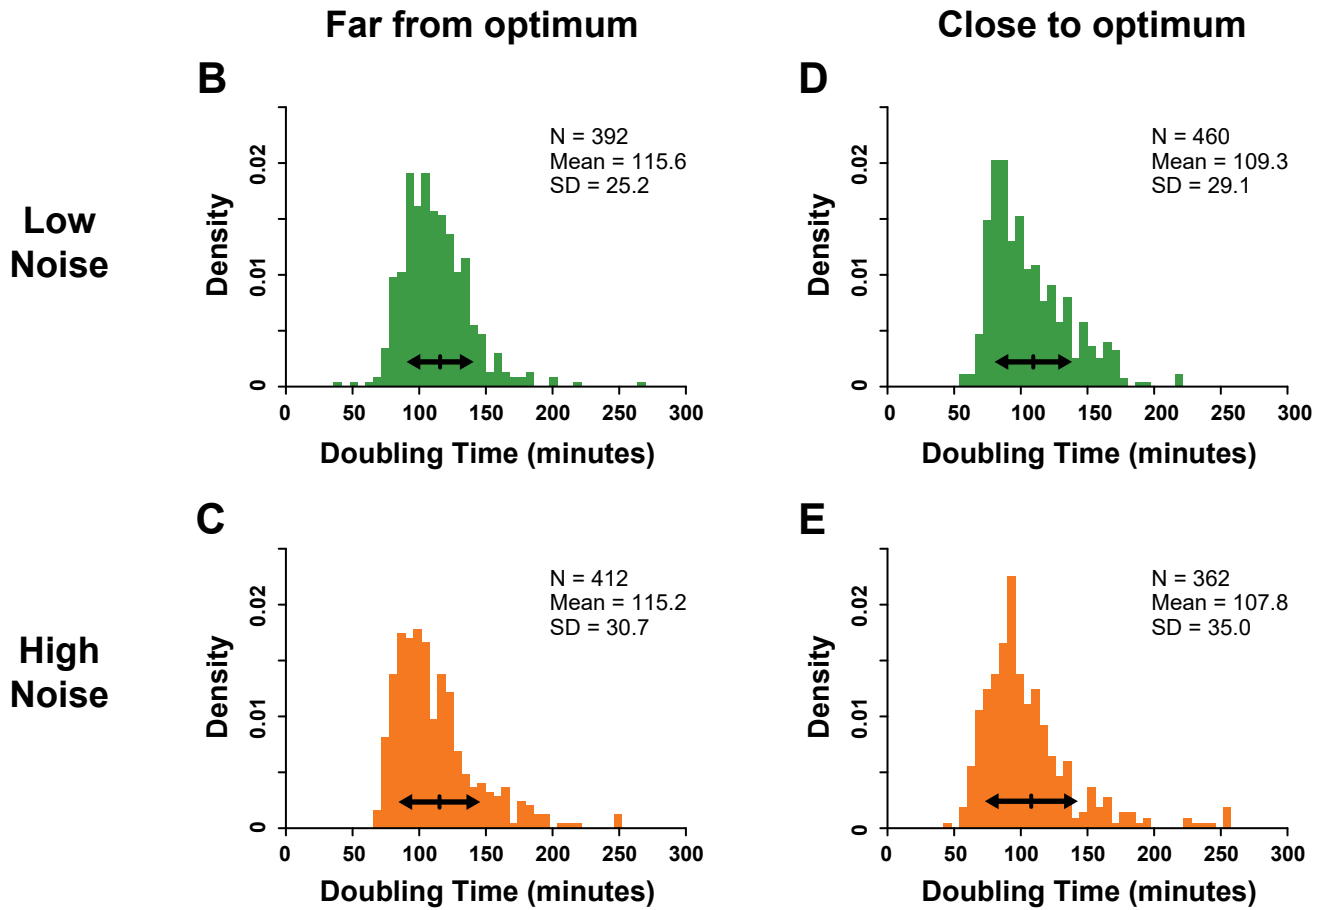

Supplement: supp [file elife_poa_e37272_Figure_5_figure_supplement_1.pdf › elife_poa_e37272_Figure_5_figure_supplement_1.pdf]

Figure 6 - figure supplement 1

**A**

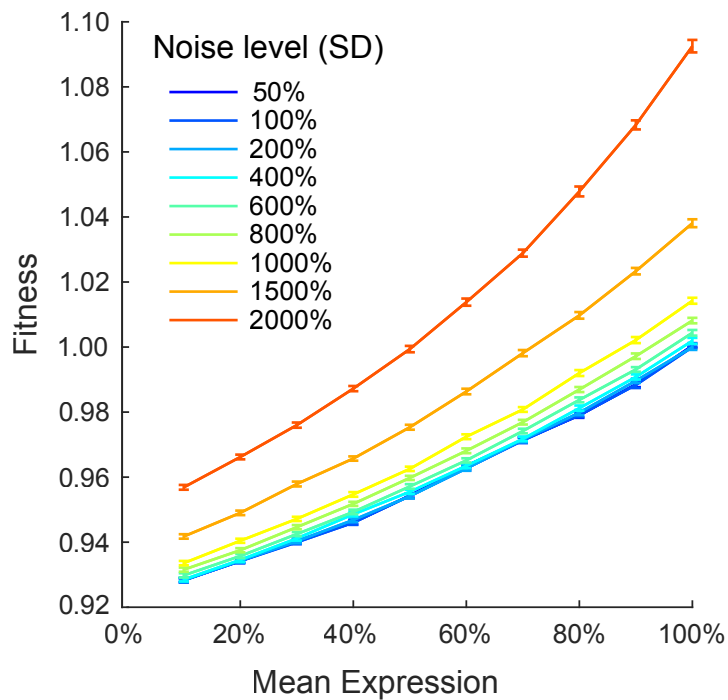

**B**

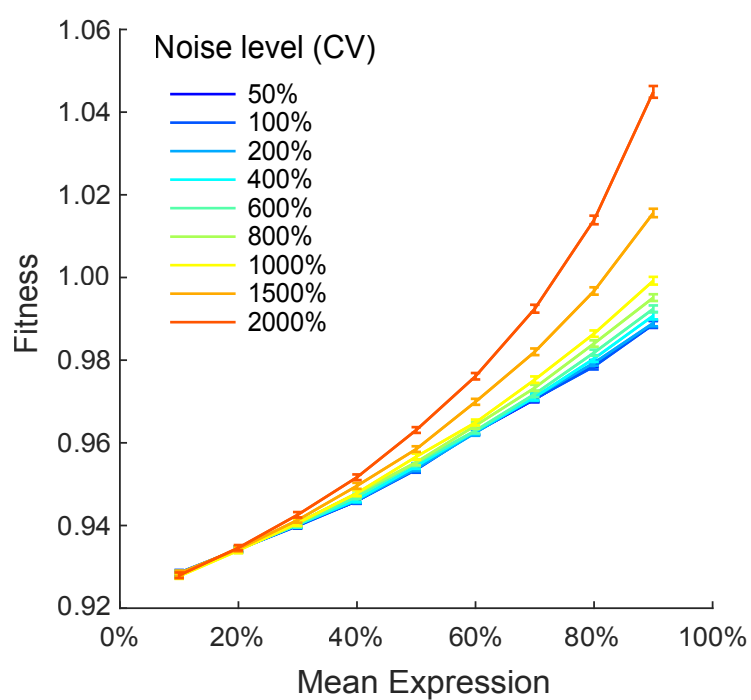

**C**

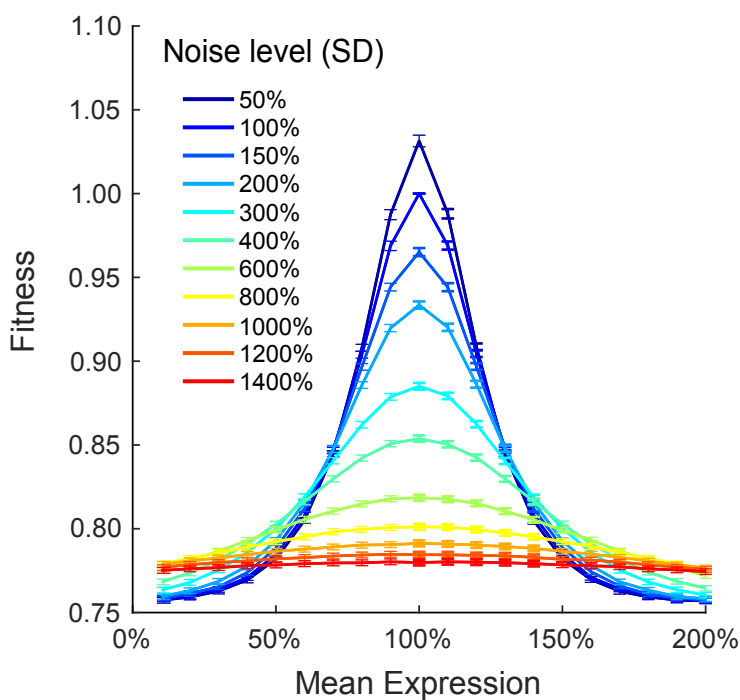

**D**

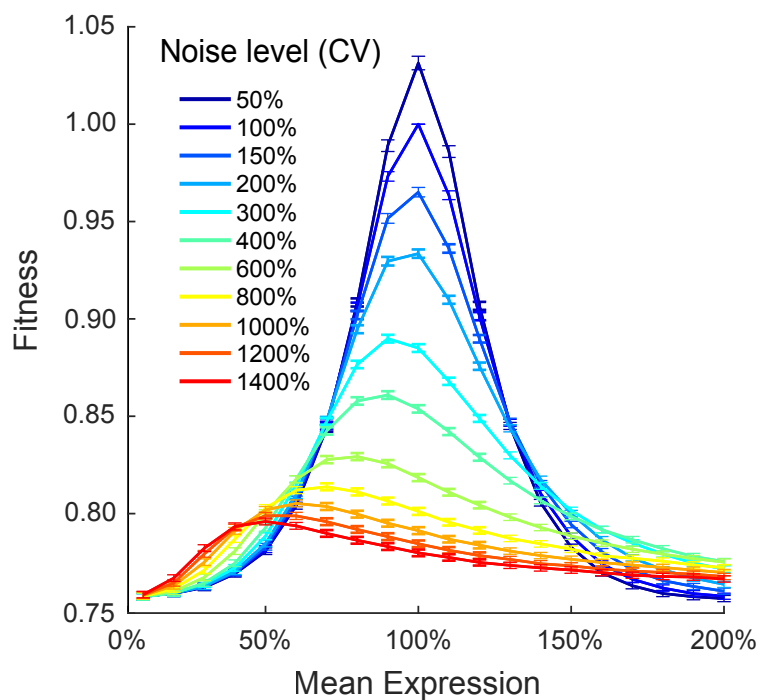

Supplement: supp [file elife_poa_e37272_Figure_6_figure_supplement_1.pdf › elife_poa_e37272_Figure_6_figure_supplement_1.pdf]

Figure 6 - figure supplement 2

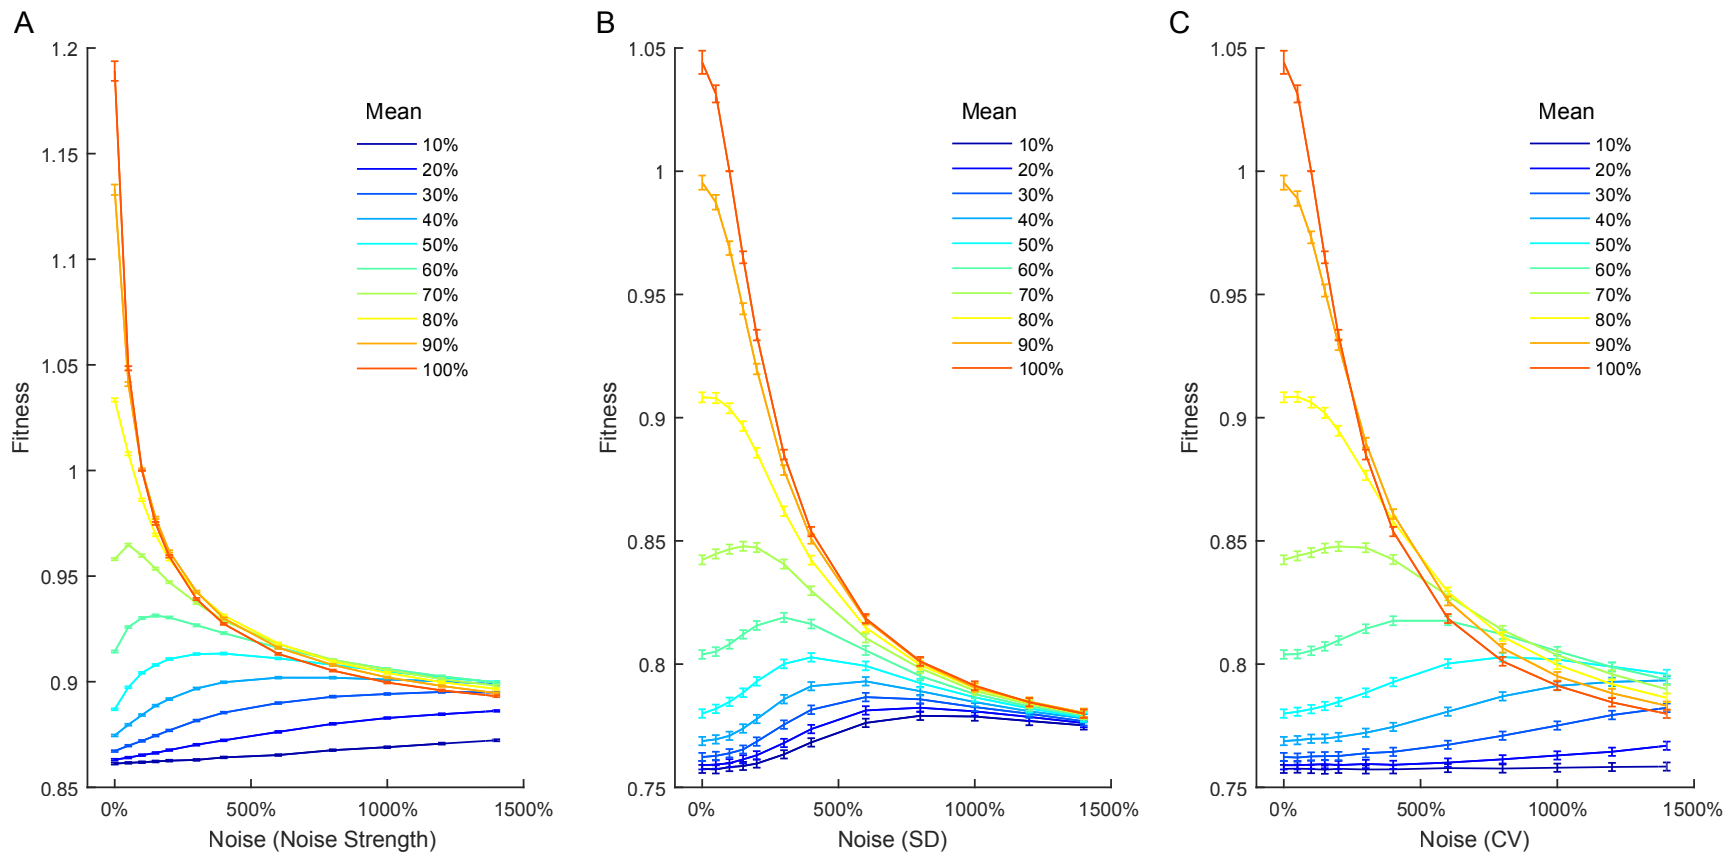

Supplement: supp [file elife_poa_e37272_Figure_6_figure_supplement_2.pdf › elife_poa_e37272_Figure_6_figure_supplement_2.pdf]
